# Supplementary material for: Transcriptome analysis of 20 taxonomically related benzylisoquinoline alkaloid-producing plants
Source: PubMed Central journal article supplement (PMC4575454; doi:10.1186/s12870-015-0596-0), 2015-09-18
Supplement: 12870_2015_596_MOESM1_ESM.pdf [file 12870_2015_596_MOESM1_ESM.pdf]

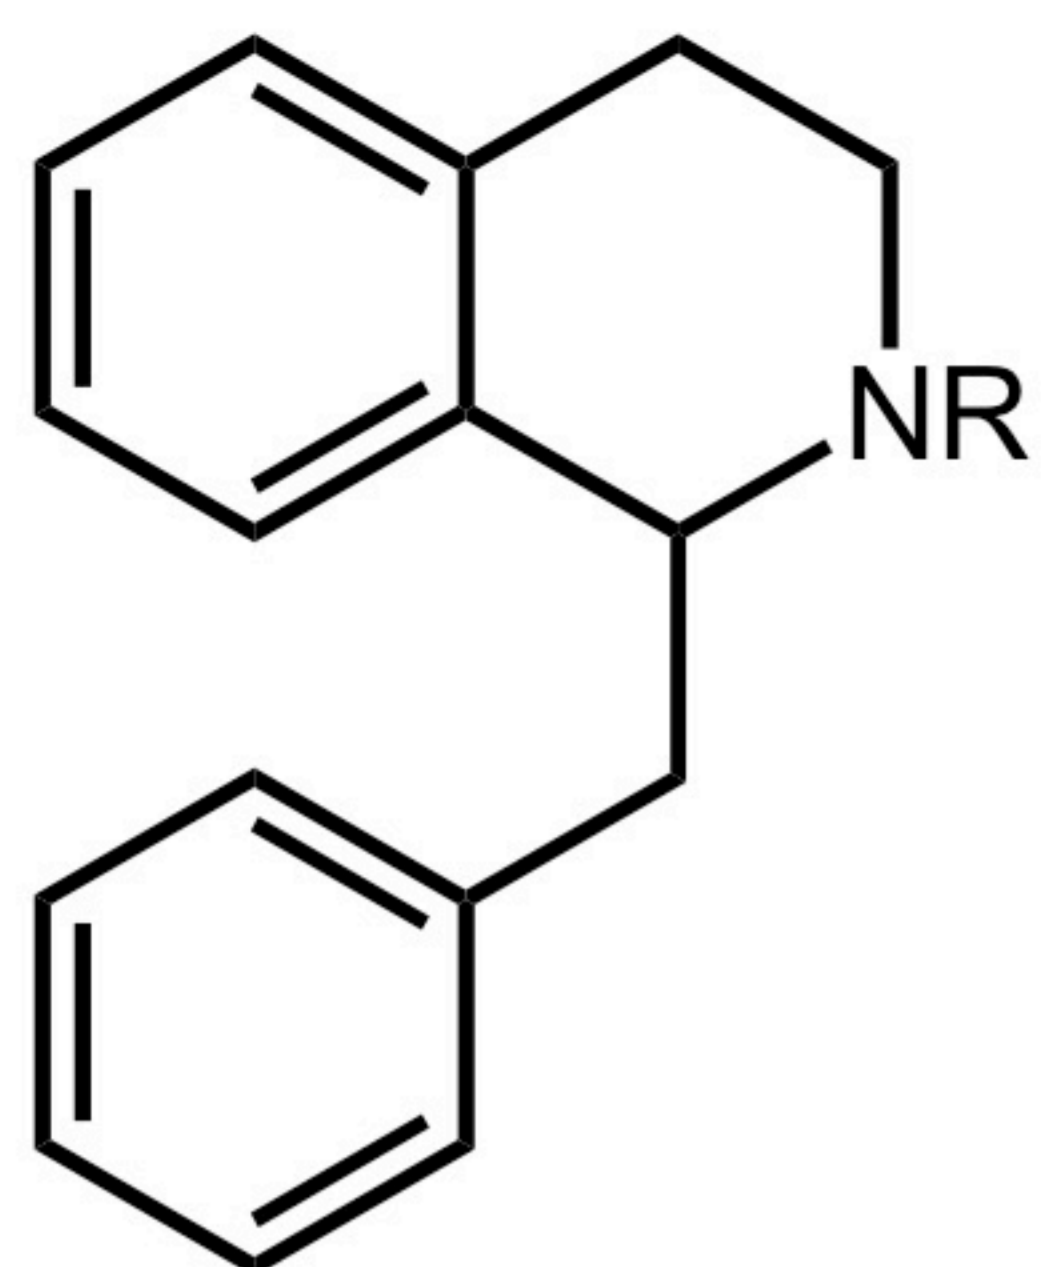

1-Benzylisoquinoline

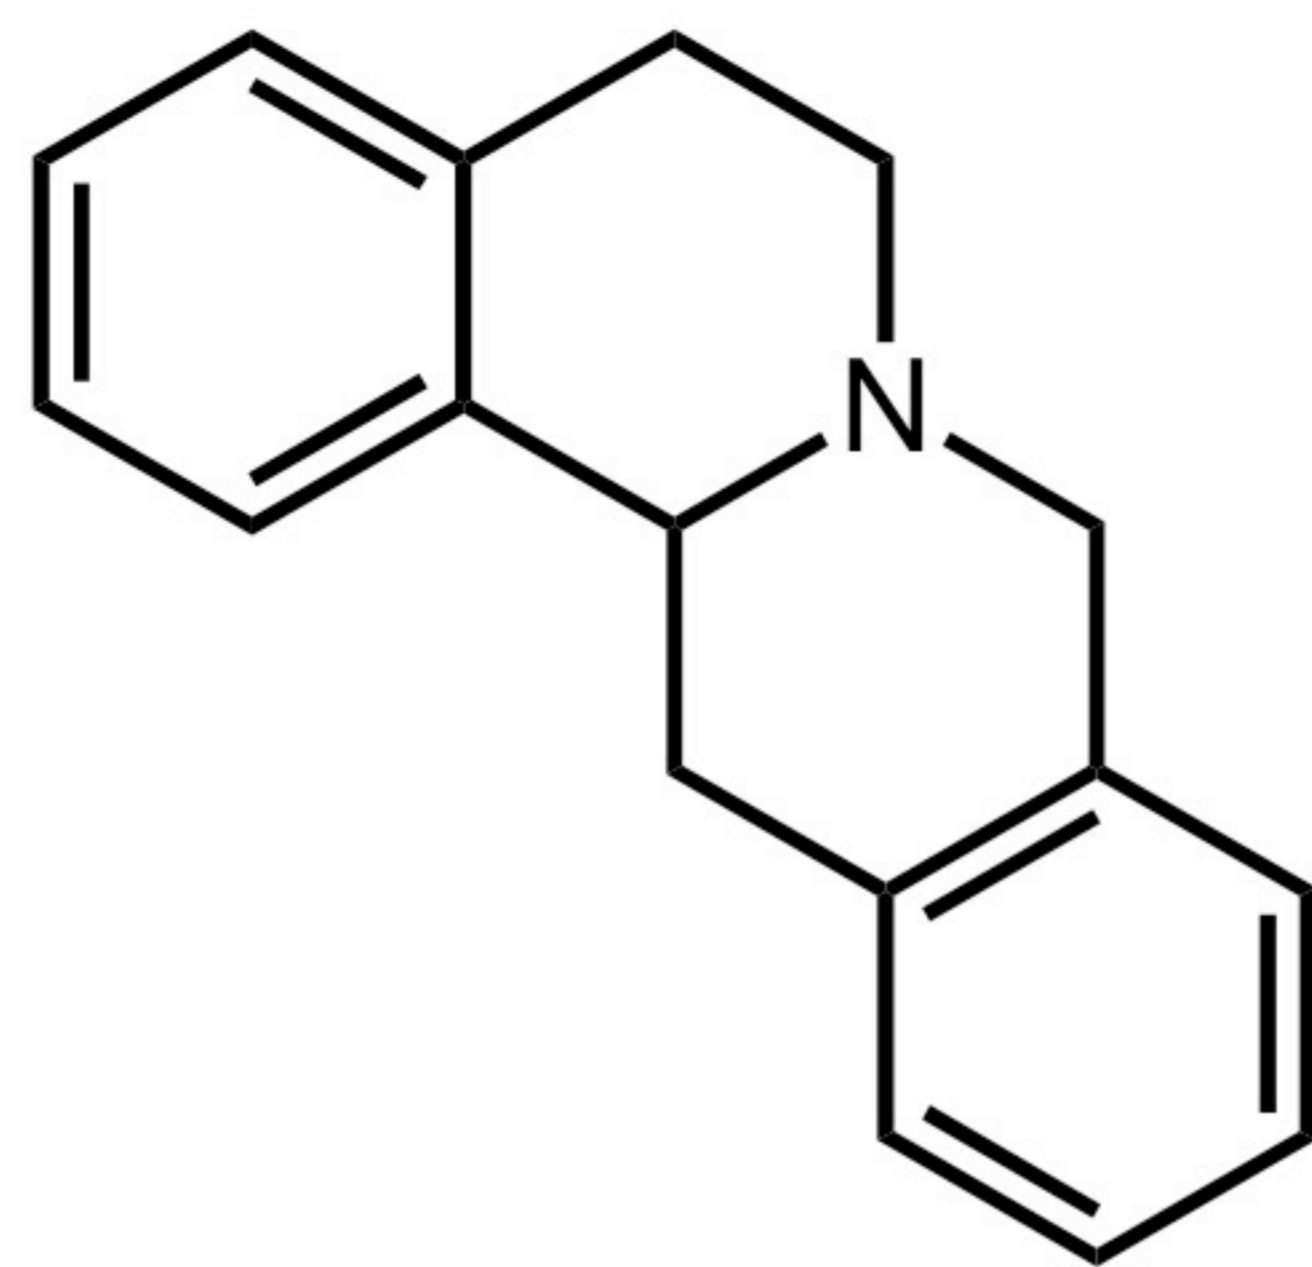

Protoberberine

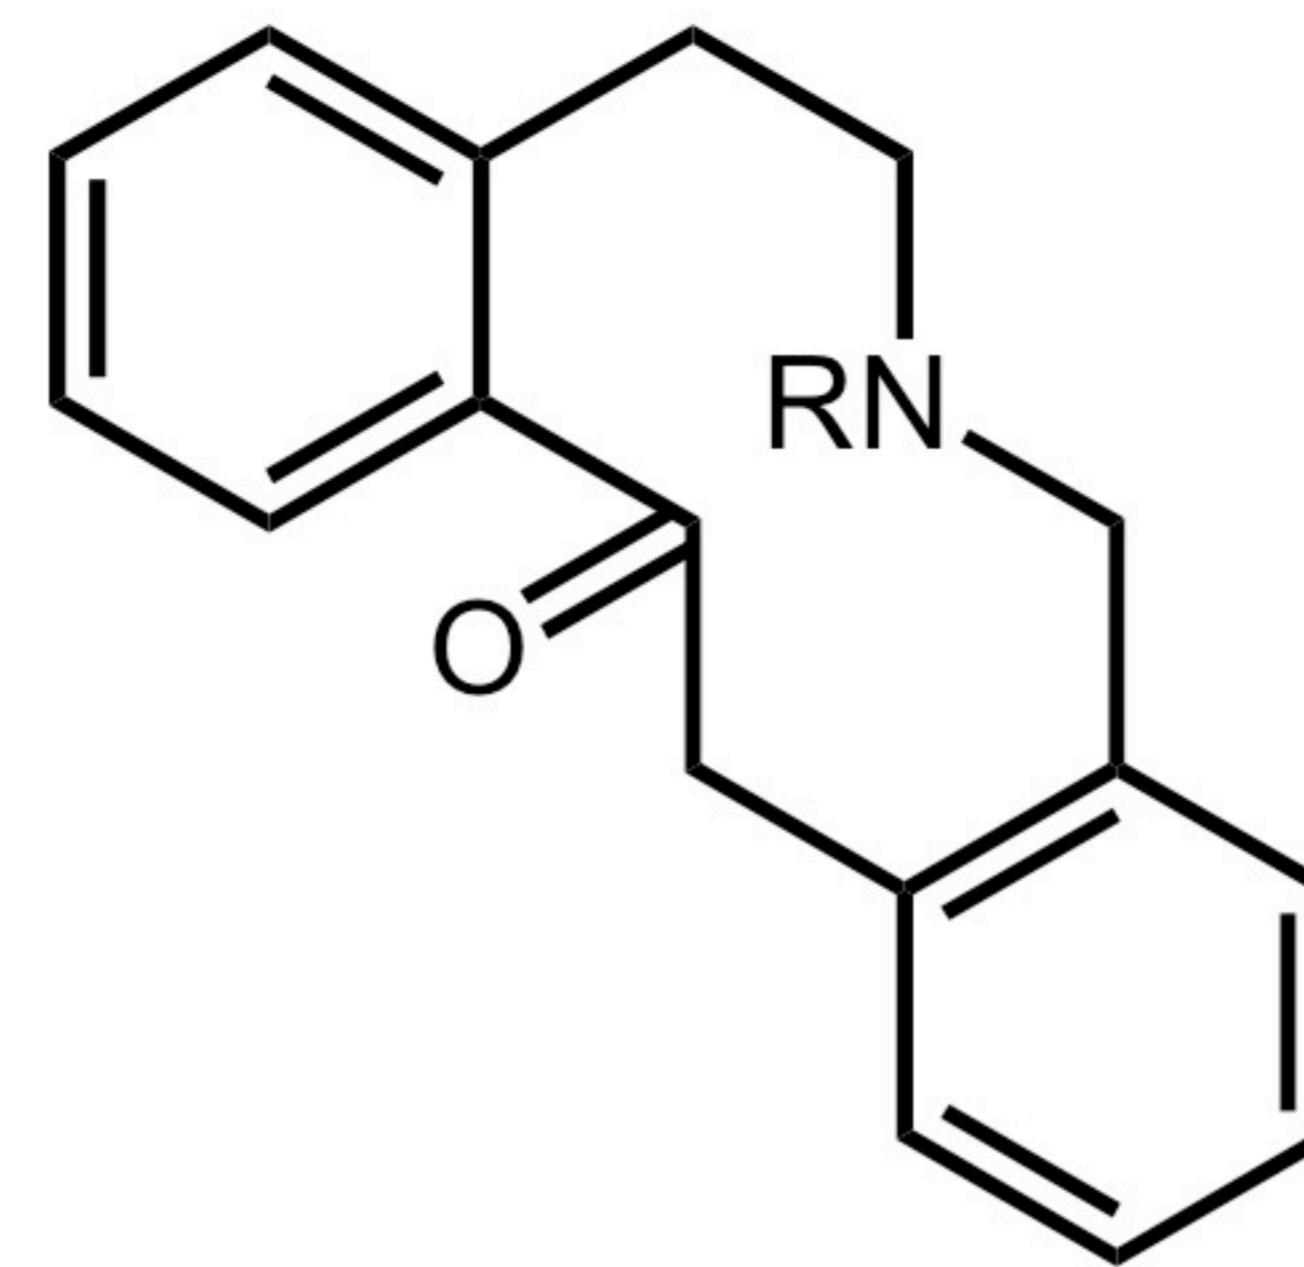

Protopine

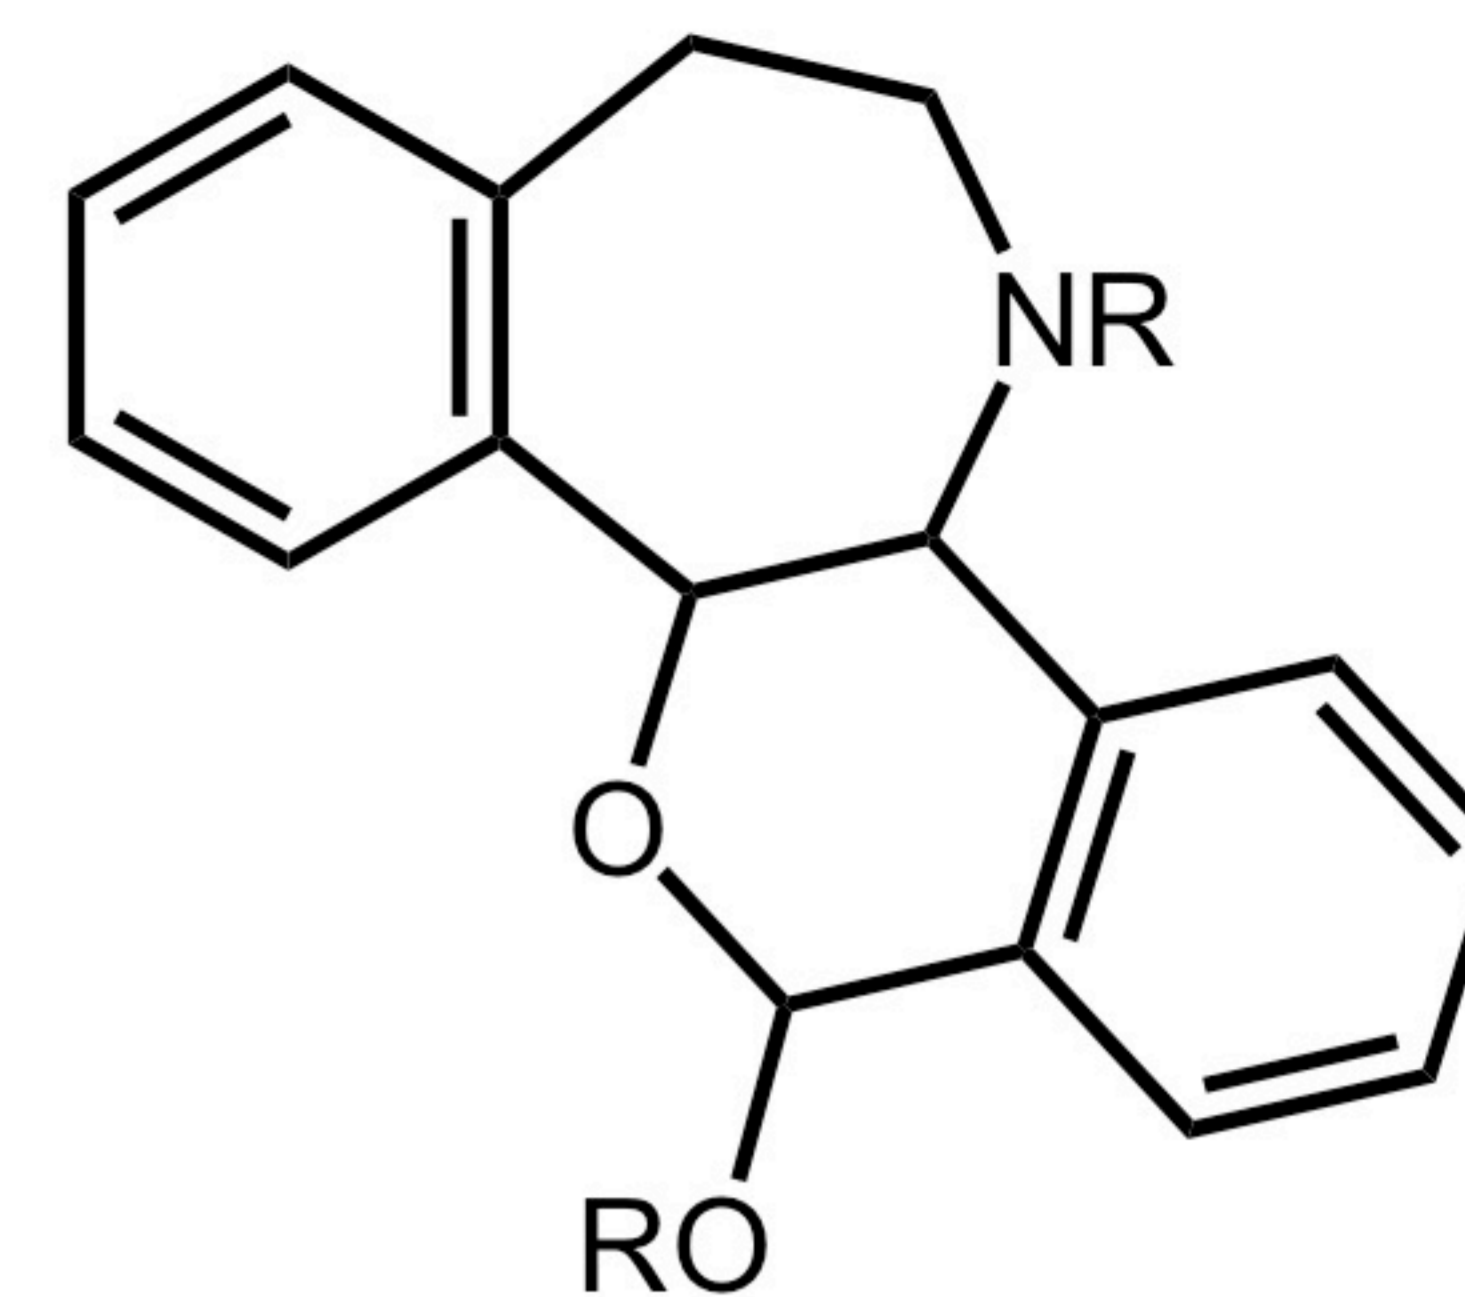

Papaverubine

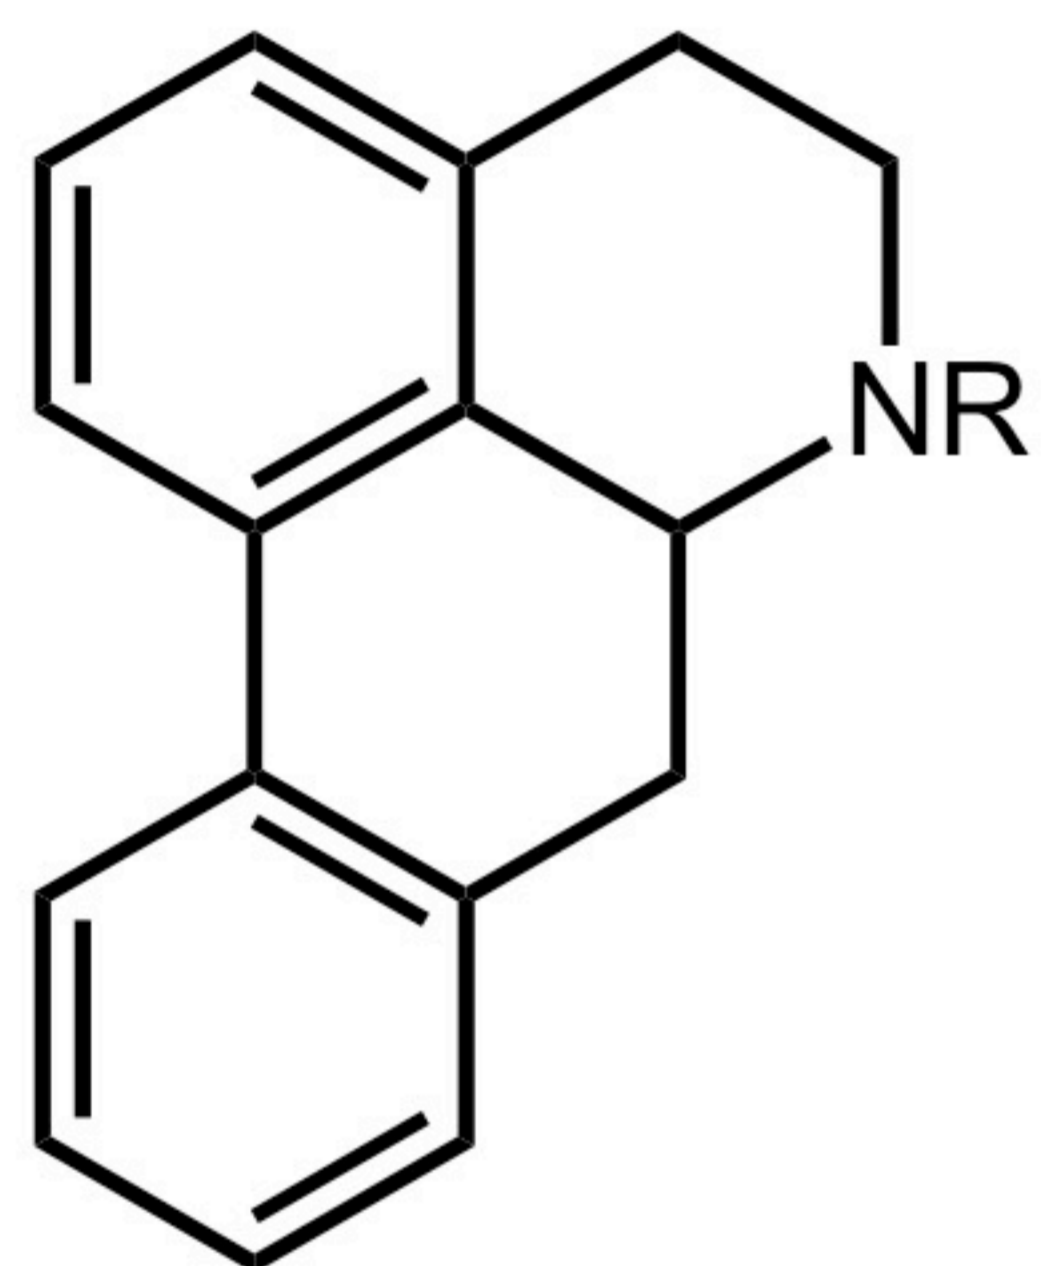

Aporphine

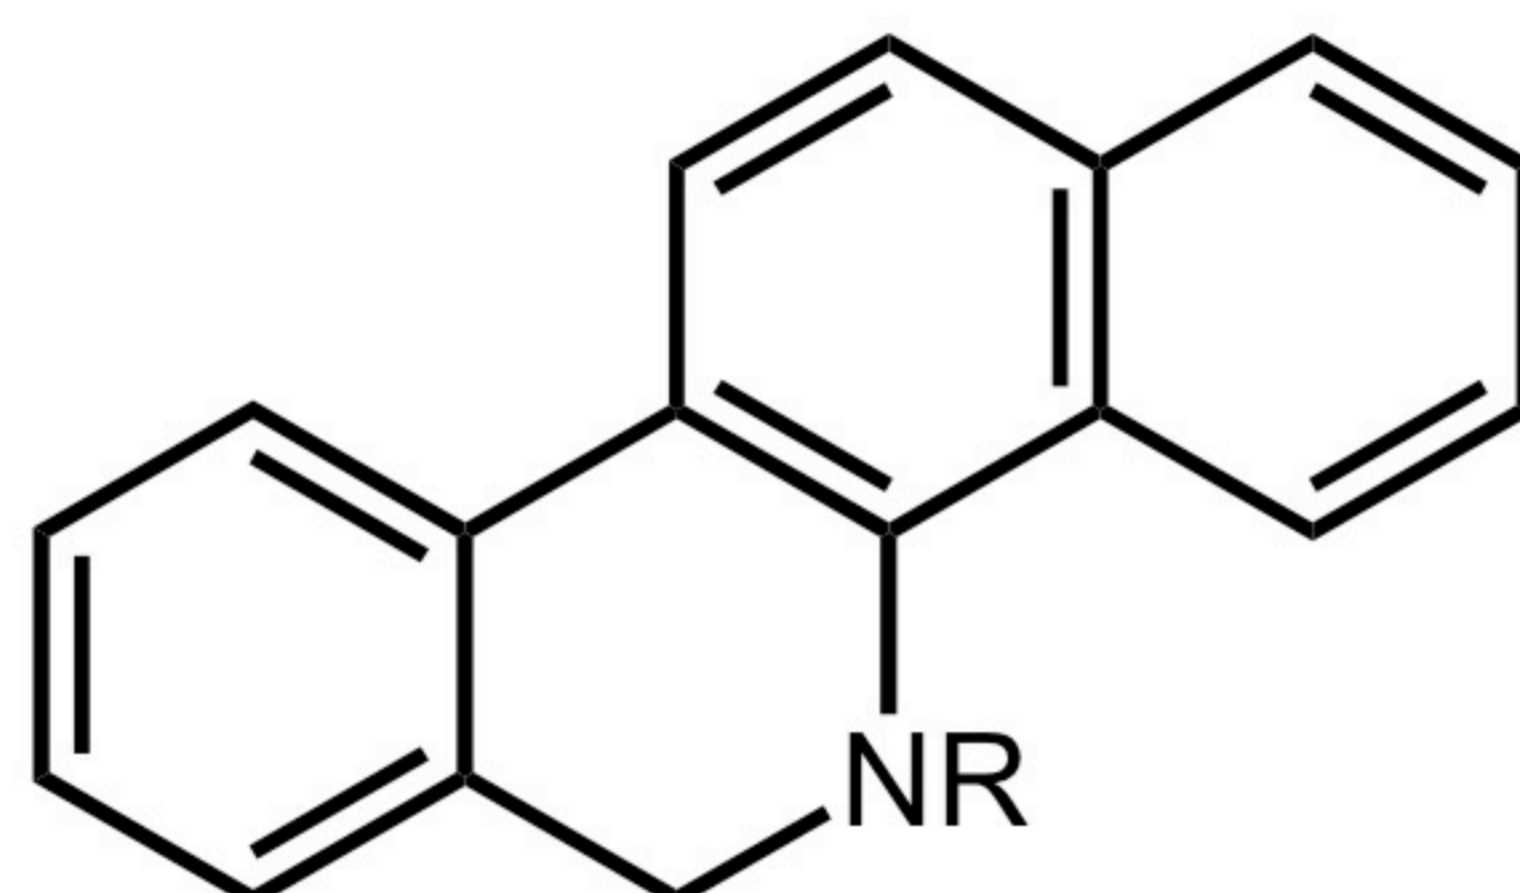

Benzo[c]phenanthridine

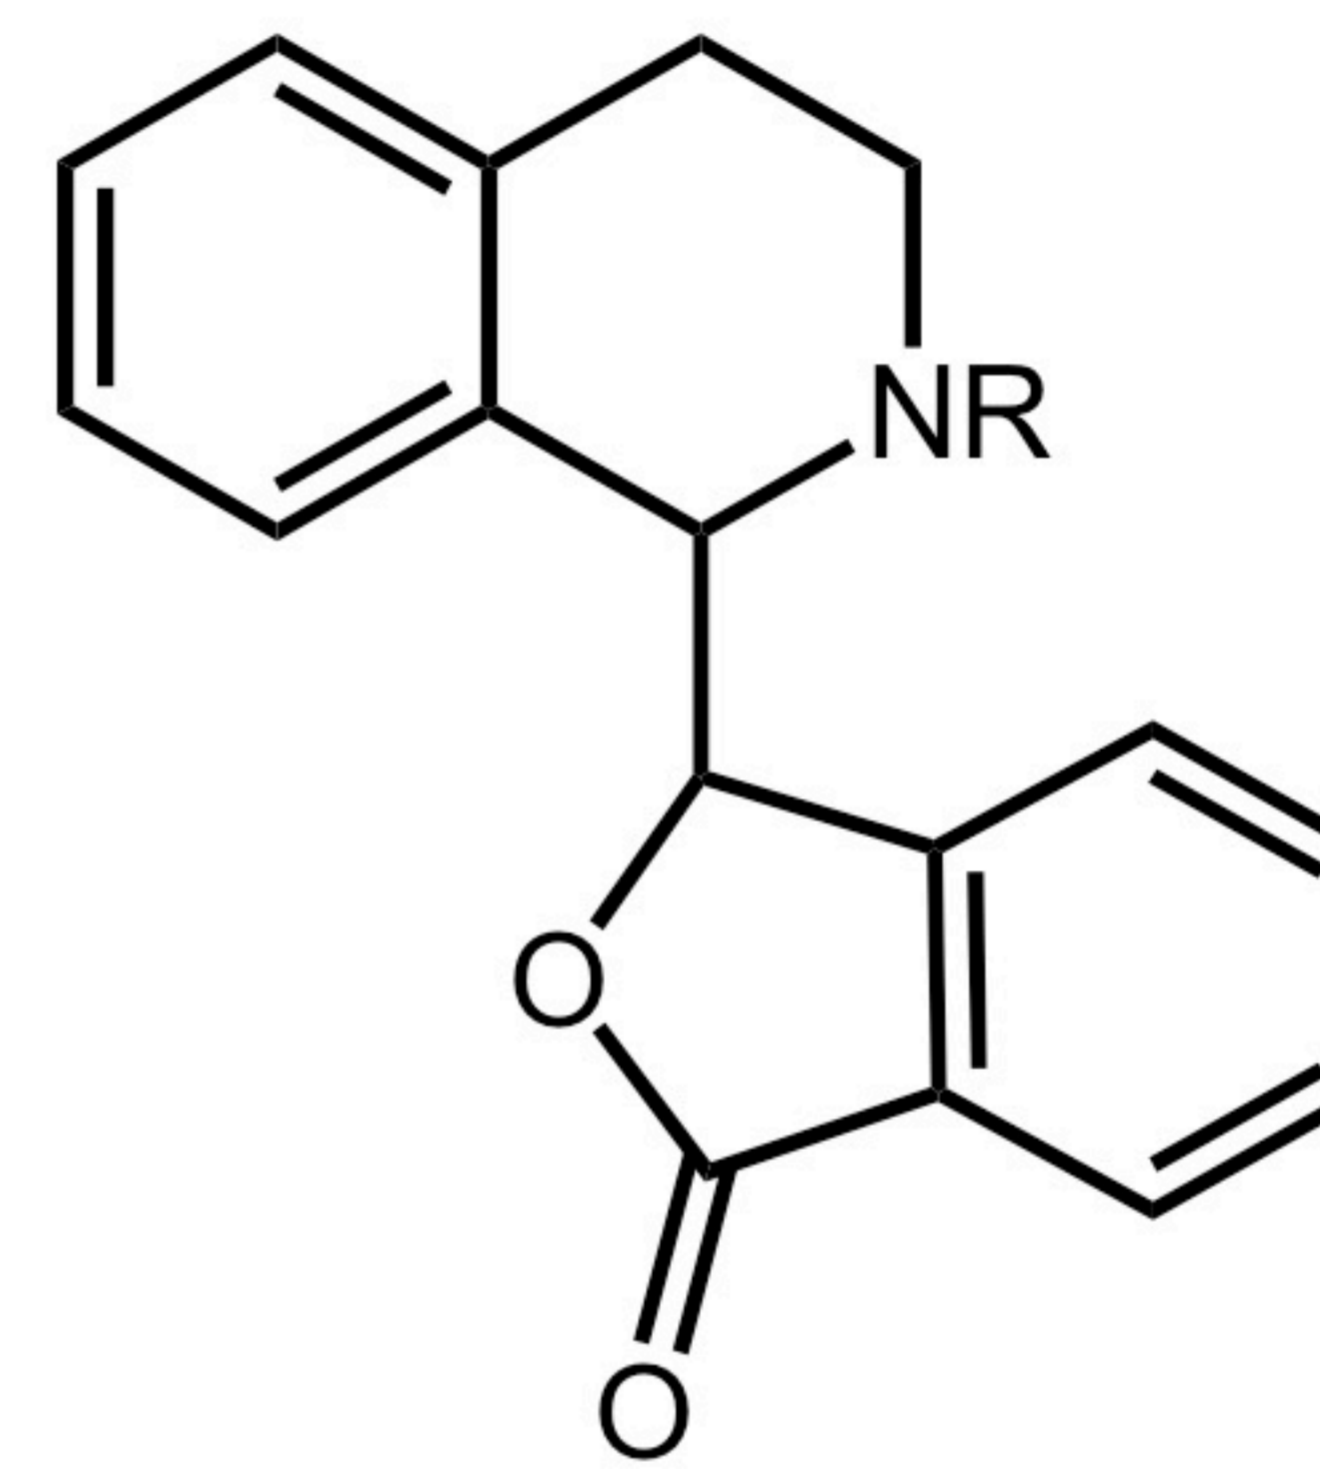

Phthalideisoquinoline

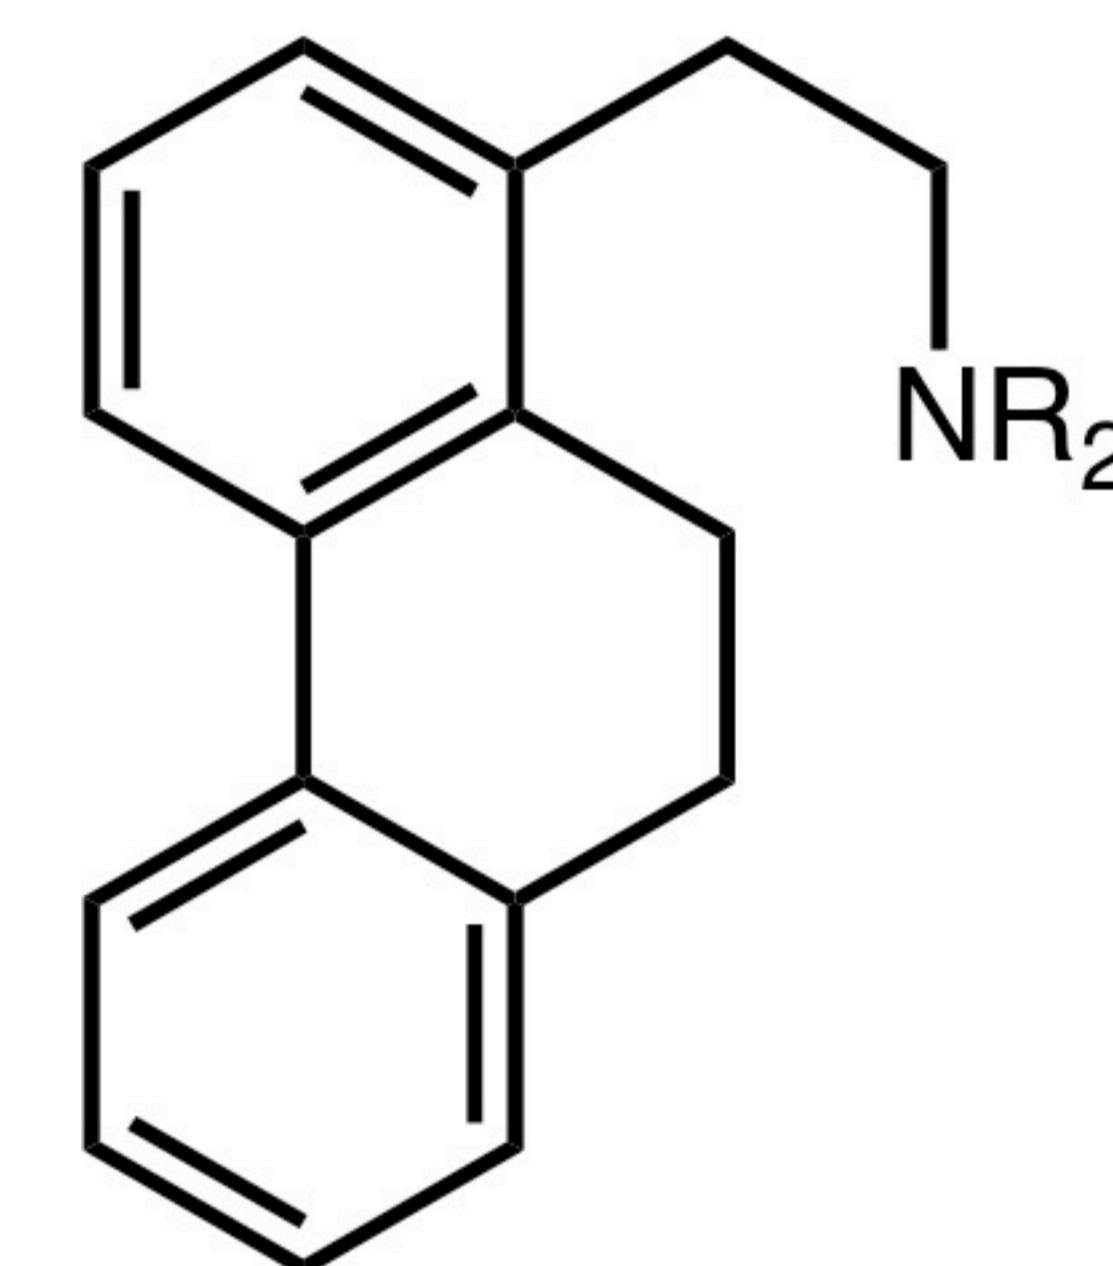

Secoisoquinoline

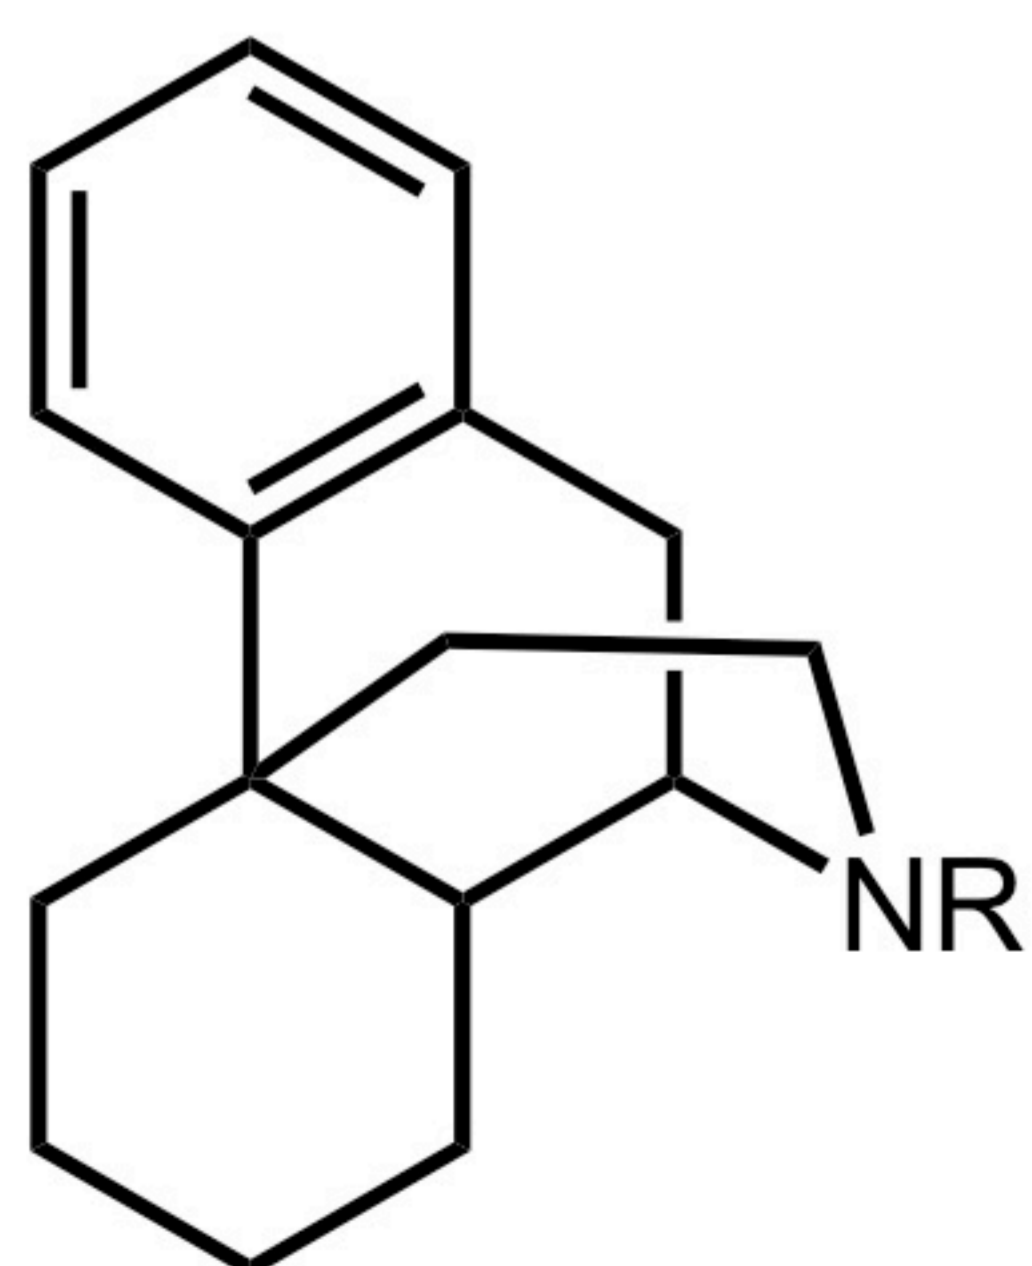

Promorphinan

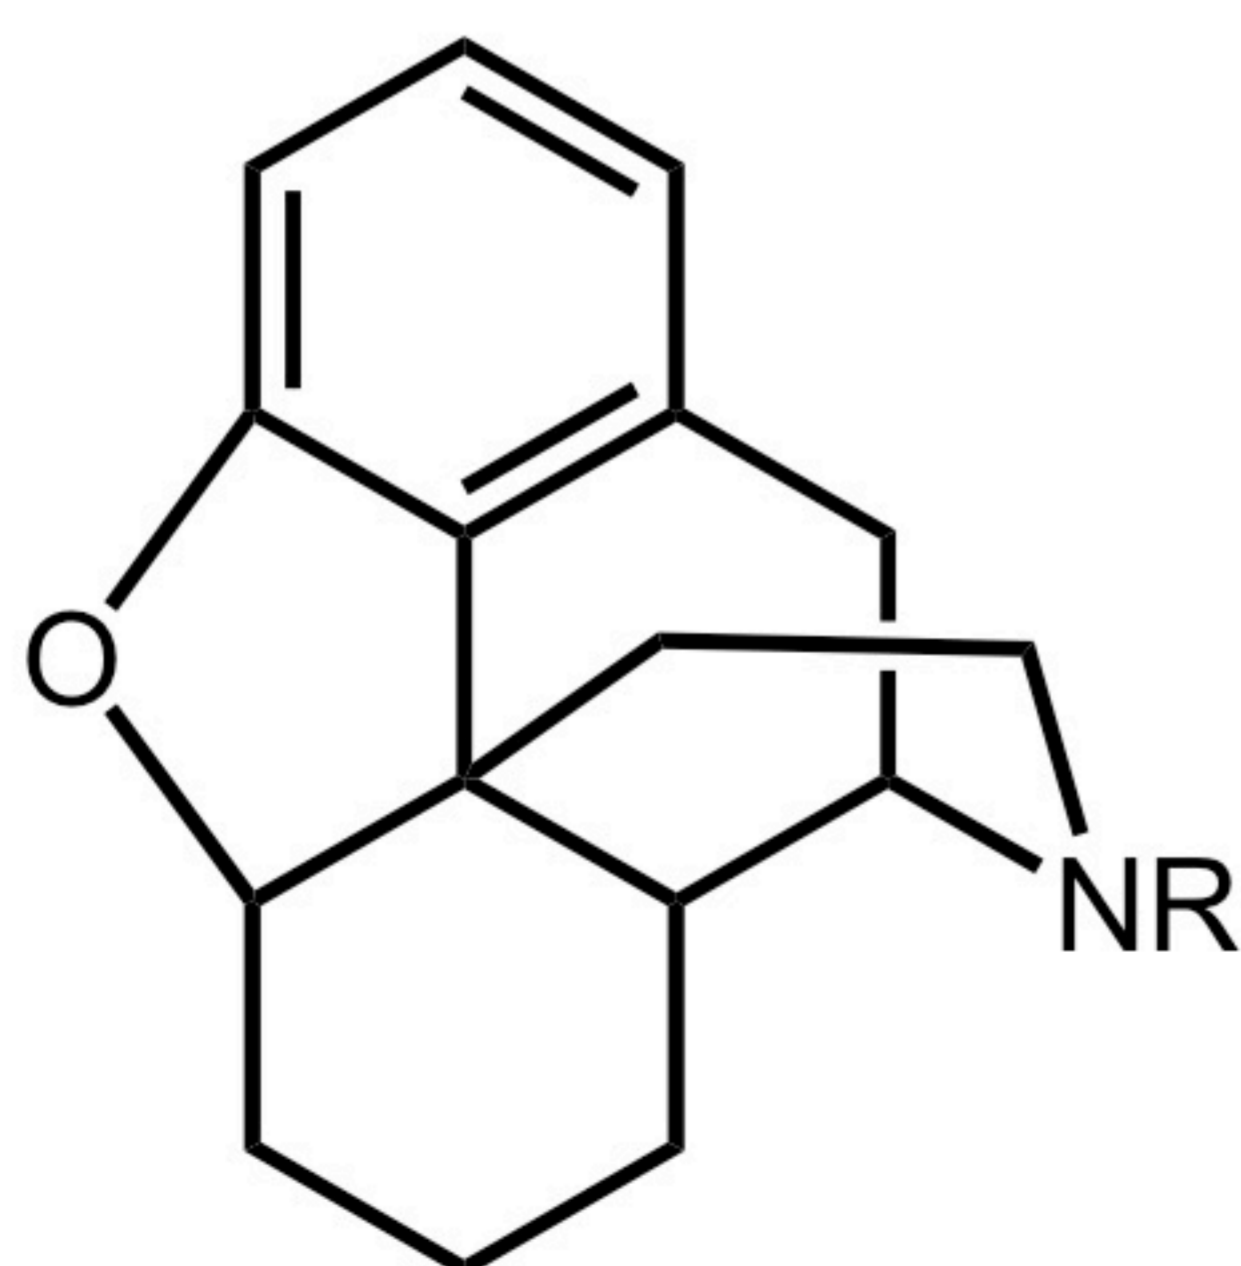

Morphinan

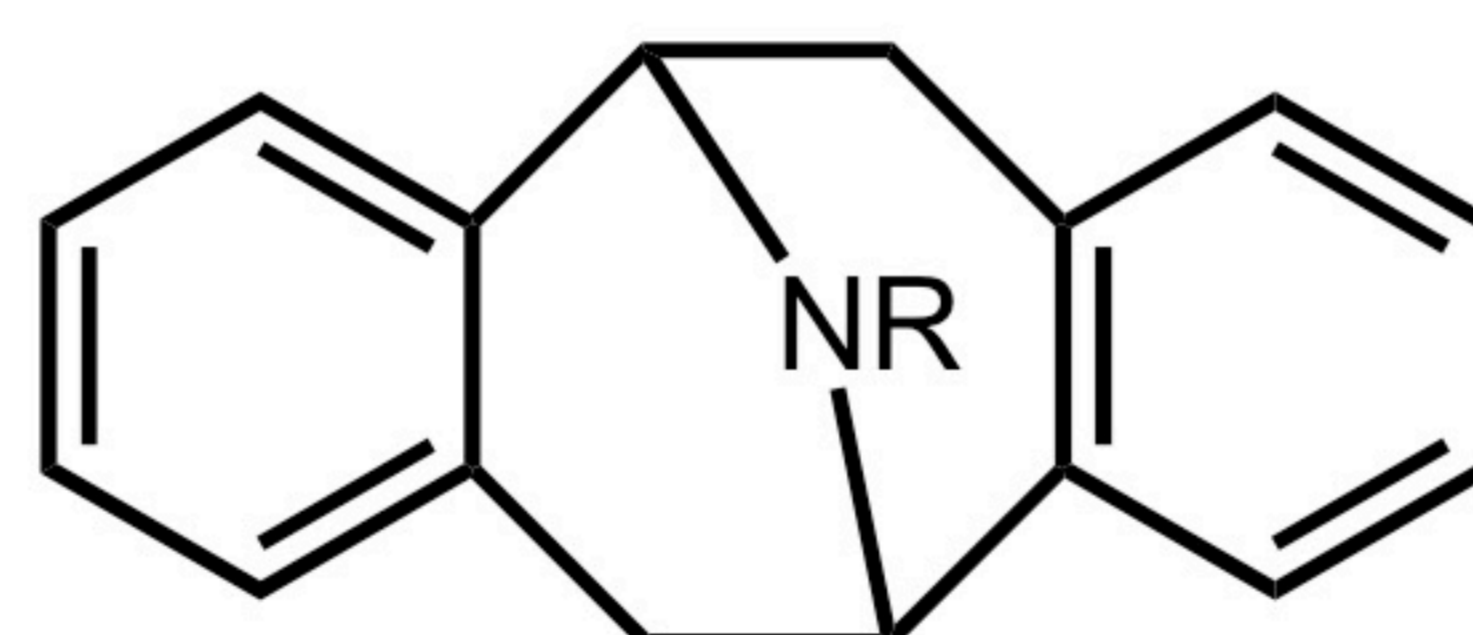

Pavine

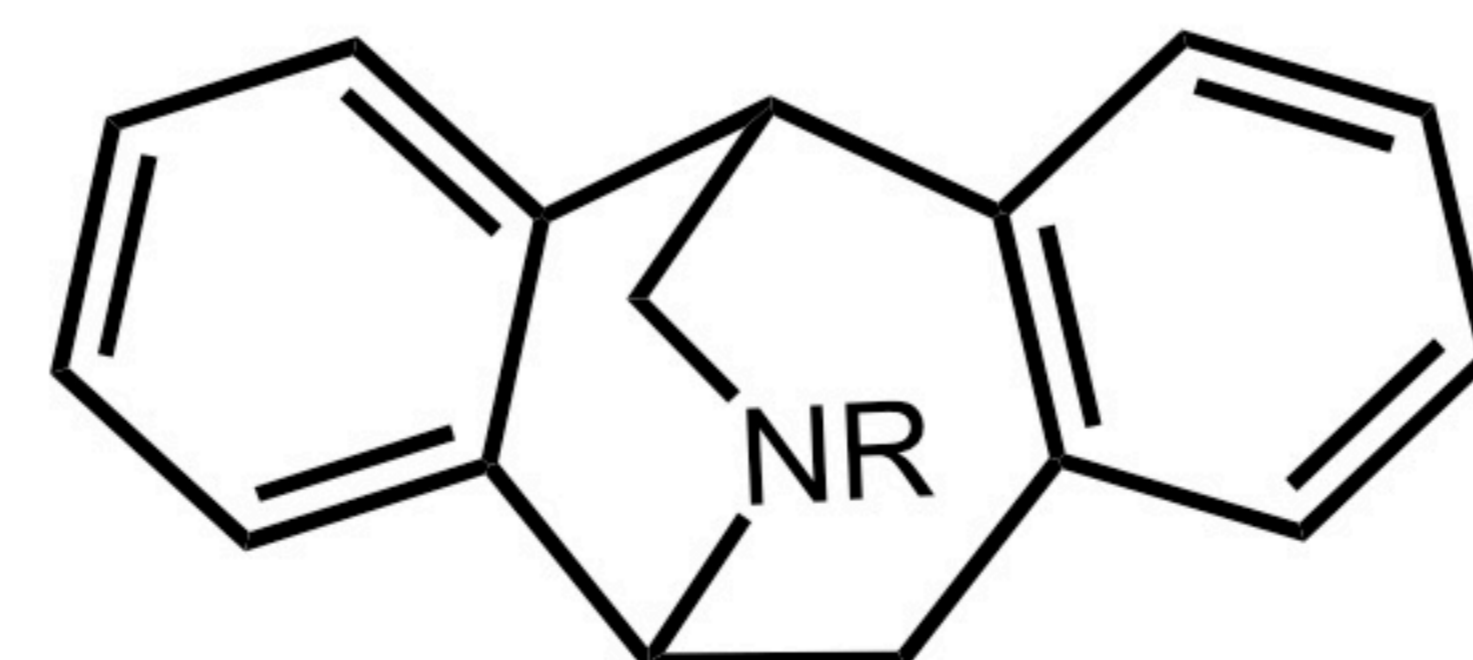

Isopavine

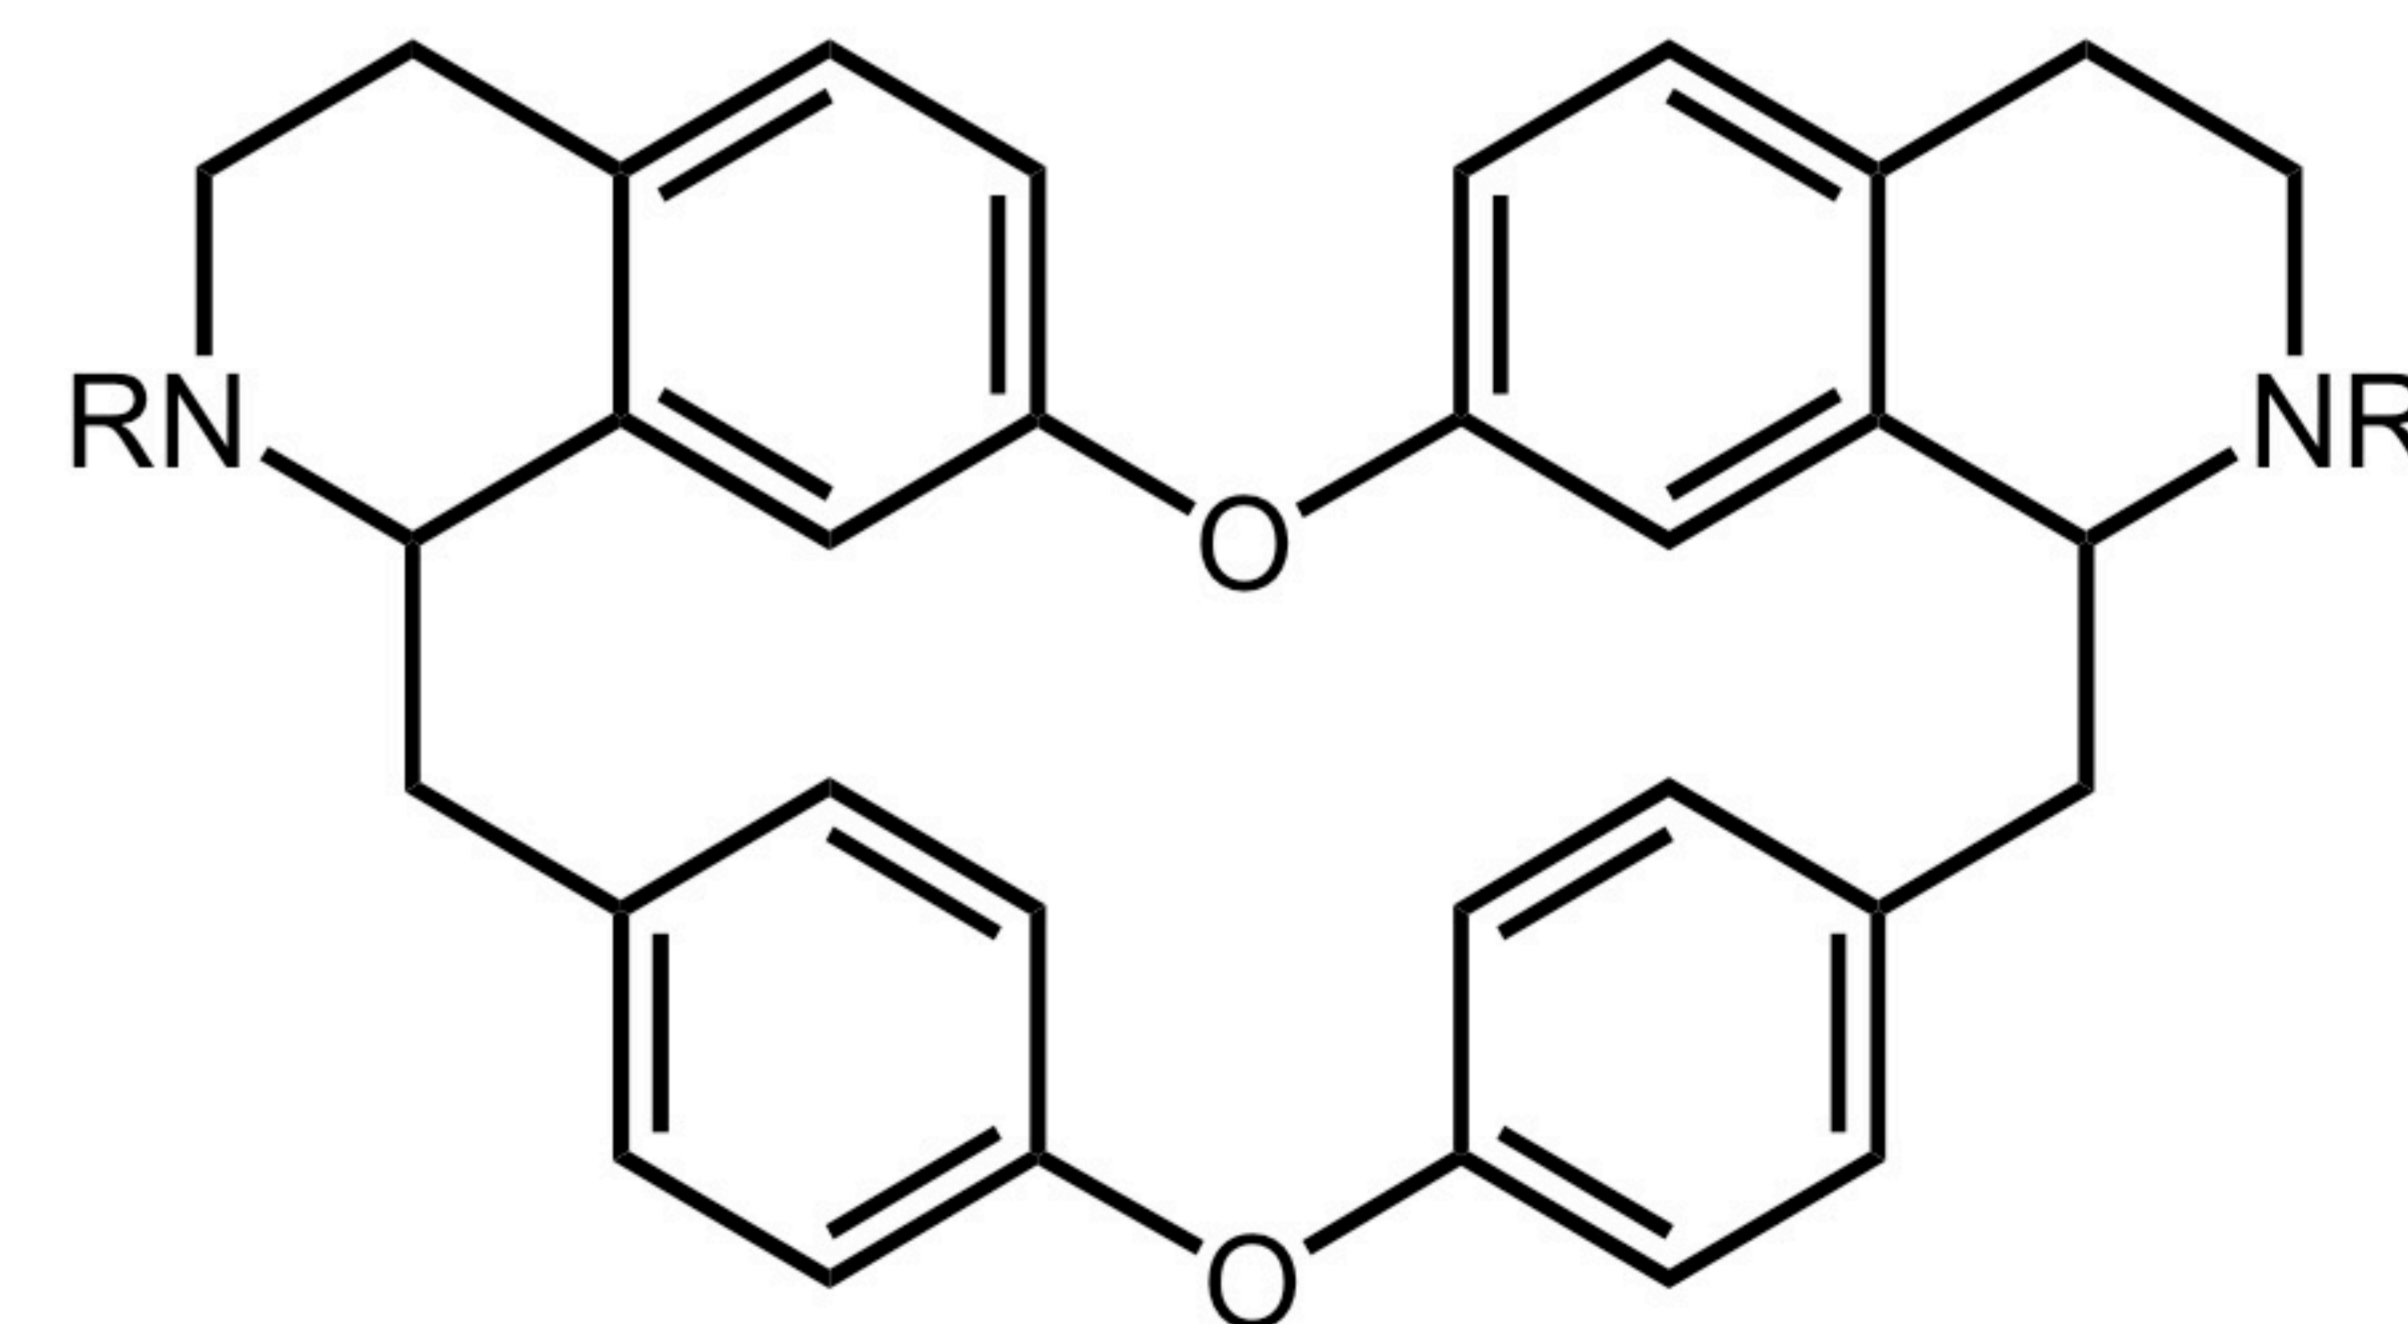

Bisbenzylisoquinoline
