# Supplementary material for: Transcriptome analysis of 20 taxonomically related benzylisoquinoline alkaloid-producing plants
Source: PubMed Central journal article supplement (PMC4575454; doi:10.1186/s12870-015-0596-0), 2015-09-18
Supplement: 12870_2015_596_MOESM3_ESM.pdf [file 12870_2015_596_MOESM3_ESM.pdf]

| No.            | Abbrev. | Plant                           | Tissue  | Roche GS-FLX Titanium |                     |                         |                          |                                          | Unigenes      | Predicted full-length CDS | Intersects between 454 and Illumina predicted full-length CDS |
|----------------|---------|---------------------------------|---------|-----------------------|---------------------|-------------------------|--------------------------|------------------------------------------|---------------|---------------------------|---------------------------------------------------------------|
|                |         |                                 |         | SRA accession number  | Number of raw reads | Number of cleaned reads | Average read length (bp) | Average transcript read depth (reads/bp) |               |                           |                                                               |
| 1              | AME     | <i>Argemone mexicana</i>        | Stem    | SRX078322             | 579,575             | 511,923                 | 406                      | 8.0                                      | 25,499        | 14,446                    | 8,010                                                         |
| 2              | BTH     | <i>Berberis thunbergii</i>      | Root    | SRX202153             | 728,069             | 721,524                 | 340                      | 6.2                                      | 41,672        | 12,312                    | 6,129                                                         |
| 3              | CMA     | <i>Chelidonium majus</i>        | Stem    | SRS150402             | 504,849             | 408,742                 | 347                      | 7.1                                      | 23,678        | 10,312                    | 8,298                                                         |
| 4              | CMU     | <i>Cissampelos mucronata</i>    | Callus  | SRX130678             | 721,691             | 714,978                 | 376                      | 7.3                                      | 35,166        | 14,300                    | 9,877                                                         |
| 5              | CTR     | <i>Cocculus trilobus</i>        | Callus  | SRX130682             | 535,082             | 525,283                 | 327                      | 5.2                                      | 34,783        | 11,784                    | 127                                                           |
| 6              | CCH     | <i>Corydalis chelanthifolia</i> | Root    | SRX078320             | 502,500             | 431,507                 | 360                      | 7.6                                      | 22,511        | 10,912                    | 8,716                                                         |
| 7              | ECA     | <i>Eschscholzia californica</i> | Root    | SRS160813             | 472,167             | 423,743                 | 428                      | 5.8                                      | 32,150        | 17,385                    | 12,911                                                        |
| 8              | GFL     | <i>Glaucium flavum</i>          | Root    | SRS212395             | 648,604             | 540,433                 | 396                      | 8.1                                      | 26,520        | 12,084                    | 8,199                                                         |
| 9              | HCA     | <i>Hydrastis canadensis</i>     | Rhizome | SRS212407             | 685,239             | 440,083                 | 254                      | 6.8                                      | 23,809        | 10,801                    | 7,617                                                         |
| 10             | JDI     | <i>Jeffersonia diphylla</i>     | Root    | SRX202161             | 833,182             | 821,875                 | 340                      | 7.4                                      | 38,773        | 13,293                    | 8,880                                                         |
| 11             | MAQ     | <i>Mahonia aquifolium</i>       | Bark    | SRX078960             | 508,160             | 442,484                 | 289                      | 5.1                                      | 36,429        | 11,802                    | 495                                                           |
| 12             | MCA     | <i>Menispermum canadense</i>    | Rhizome | SRX078321             | 443,738             | 392,619                 | 378                      | 5.7                                      | 36,399        | 8,858                     | 3,956                                                         |
| 13             | NDA     | <i>Nandina domestica</i>        | Root    | SRX202162             | 832,375             | 821,728                 | 372                      | 6.4                                      | 45,387        | 18,367                    | 11,138                                                        |
| 14             | NSA     | <i>Nigella sativa</i>           | Root    | SRX078325             | 1,326,498           | 1,203,320               | 318                      | 9.1                                      | 50,508        | 19,551                    | 10,457                                                        |
| 15             | PBR     | <i>Papaver bracteatum</i>       | Stem    | SRS160814             | 595,176             | 528,920                 | 380                      | 4.7                                      | 46,224        | 18,879                    | 14,042                                                        |
| 16             | SCA     | <i>Sanguinaria canadensis</i>   | Rhizome | SRS212403             | 653,689             | 571,822                 | 417                      | 8.7                                      | 25,652        | 11,787                    | 9,514                                                         |
| 17             | SDI     | <i>Stylophorum diphyllum</i>    | Stem    | SRX078312             | 646,959             | 576,700                 | 353                      | 5.5                                      | 43,568        | 19,631                    | 9,836                                                         |
| 18             | TFL     | <i>Thalictrum flavum</i>        | Root    | SRX039636             | 440,689             | 401,315                 | 385                      | 7.8                                      | 21,146        | 13,002                    | 8,153                                                         |
| 19             | TCO     | <i>Tinospora cordifolia</i>     | Callus  | SRX130689             | 647,850             | 641,937                 | 381                      | 6.8                                      | 34,518        | 14,352                    | 9,403                                                         |
| 20             | XSI     | <i>Xanthoriza simplicissima</i> | Rhizome | SRX078324             | 978,176             | 729,767                 | 265                      | 6.3                                      | 42,969        | 15,995                    | 7,107                                                         |
| <b>Average</b> |         |                                 |         |                       | <b>664,213</b>      | <b>592,535</b>          | <b>356</b>               | <b>6.8</b>                               | <b>34,368</b> | <b>13,993</b>             | <b>7,708</b>                                                  |
