# Supplementary material for: Transcriptome analysis of 20 taxonomically related benzylisoquinoline alkaloid-producing plants
Source: PubMed Central journal article supplement (PMC4575454; doi:10.1186/s12870-015-0596-0), 2015-09-18
Supplement: 12870_2015_596_MOESM4_ESM.pdf [file 12870_2015_596_MOESM4_ESM.pdf]

| No.            | Abbrev. | Plant                           | Tissue  | Illumina GA / HiSeq  |                     |                         |                                          | Unigenes      | Predicted full-length CDS |
|----------------|---------|---------------------------------|---------|----------------------|---------------------|-------------------------|------------------------------------------|---------------|---------------------------|
|                |         |                                 |         | SRA accession number | Number of raw reads | Number of cleaned reads | Average transcript read depth (reads/bp) |               |                           |
| 1              | AME     | <i>Argemone mexicana</i>        | Stem    | SRX096074            | 79,936,080          | 50,819,736              | 39.1                                     | 75,101        | 32,940                    |
| 2              | BTH     | <i>Berberis thunbergii</i>      | Root    | SRX096075            | 70,074,022          | 64,584,658              | 53.1                                     | 88,302        | 24976                     |
| 3              | CMA     | <i>Chelidonium majus</i>        | Stem    | SRX096034            | 62,362,800          | 50,819,736              | 32.3                                     | 45,005        | 32,416                    |
| 4              | CMU     | <i>Cissampelos mucronata</i>    | Callus  | SRX130854            | 232,997,416         | 190,922,766             | 137.1                                    | 69,822        | 21,140                    |
| 5              | CTR     | <i>Cocculus trilobus</i>        | Callus  | SRX202432            | 220,956,972         | 190,682,284             | 69.0                                     | 84,793        | 3,773                     |
| 6              | CCH     | <i>Corydalis chelanthifolia</i> | Root    | SRX096066            | 79,161,120          | 69073478                | 38.2                                     | 51,797        | 42,019                    |
| 7              | ECA     | <i>Eschscholzia californica</i> | Root    | SRX096037            | 62,704,080          | 53,746,798              | 37.3                                     | 42,167        | 31,085                    |
| 8              | GFL     | <i>Glaucium flavum</i>          | Root    | SRX096058            | 60,410,640          | 38,697,818              | 63.2                                     | 31,100        | 15,861                    |
| 9              | HCA     | <i>Hydrastis canadensis</i>     | Rhizome | SRX096072            | 71,077,680          | 61,254,386              | 87.8                                     | 33,335        | 18,744                    |
| 10             | JDI     | <i>Jeffersonia diphylla</i>     | Root    | SRX202488            | 331915850           | 235,742,972             | 187.5                                    | 86,832        | 24,421                    |
| 11             | MAQ     | <i>Mahonia aquifolium</i>       | Bark    | SRX202767            | 231932044           | 196,915,558             | 62.2                                     | 98,375        | 13,,866                   |
| 12             | MCA     | <i>Menispermum canadense</i>    | Rhizome | SRX096076            | 82,491,120          | 71,509,392              | 42.7                                     | 87,141        | 32,954                    |
| 13             | NDA     | <i>Nandina domestica</i>        | Root    | SRX096070            | 84,144,000          | 70,453,764              | 51.9                                     | 70,425        | 27,337                    |
| 14             | NSA     | <i>Nigella sativa</i>           | Root    | SRX096077            | 76517332            | 70,223,386              | 56.3                                     | 67,591        | 22,508                    |
| 15             | PBR     | <i>Papaver bracteatum</i>       | Stem    | SRX096061            | 69721200            | 57,768,096              | 36.0                                     | 70,428        | 37,752                    |
| 16             | SCA     | <i>Sanguinaria canadensis</i>   | Rhizome | SRX096071            | 71,713,920          | 59,322,808              | 23.3                                     | 53,019        | 37,241                    |
| 17             | SDI     | <i>Stylophorum diphyllum</i>    | Stem    | SRX096064            | 70,502,640          | 52,300,928              | 59.5                                     | 50,125        | 18,970                    |
| 18             | TFL     | <i>Thalictrum flavum</i>        | Root    | SRX096062            | 66,080,640          | 49,761,080              | 79.6                                     | 41,982        | 15,426                    |
| 19             | TCO     | <i>Tinospora cordifolia</i>     | Callus  | SRX202768            | 238,046,752         | 195,094,516             | 142.6                                    | 81,927        | 18,967                    |
| 20             | XSI     | <i>Xanthoriza simplicissima</i> | Rhizome | SRX245855            | 67,378,080          | 59,166,962              | 93.4                                     | 48,447        | 16,436                    |
| <b>Average</b> |         |                                 |         |                      | <b>116,506,219</b>  | <b>94,443,056</b>       | <b>69.6</b>                              | <b>63,886</b> | <b>24,442</b>             |
