# Supplementary material for: Transcriptome analysis of 20 taxonomically related benzylisoquinoline alkaloid-producing plants
Source: PubMed Central journal article supplement (PMC4575454; doi:10.1186/s12870-015-0596-0), 2015-09-18
Supplement: 12870_2015_596_MOESM5_ESM.pdf [file 12870_2015_596_MOESM5_ESM.pdf]

| No. | Abbrev. | Plant                    | Tissue | Illumina GA / HiSeq  |                     |                         |                                          | Unigenes | Predicted full-length CDS |
|-----|---------|--------------------------|--------|----------------------|---------------------|-------------------------|------------------------------------------|----------|---------------------------|
|     |         |                          |        | SRA accession number | Number of raw reads | Number of cleaned reads | Average transcript read depth (reads/bp) |          |                           |
| 3   | CMA     | <i>Chelidonium majus</i> | Stem   | SRX096034            | 62,362,786          | 50,819,736              | 32.3                                     | 45,005   | 32,416                    |
| 3a  | CMA_RT  | <i>Chelidonium majus</i> | Root   | SRX096036            | 60,969,004          | 53,233,416              | 35.0                                     | 24,292   | 34,955                    |
