# Supplementary material for: Transcriptome analysis of 20 taxonomically related benzylisoquinoline alkaloid-producing plants
Source: PubMed Central journal article supplement (PMC4575454; doi:10.1186/s12870-015-0596-0), 2015-09-18
Supplement: 12870_2015_596_MOESM6_ESM.pdf [file 12870_2015_596_MOESM6_ESM.pdf]

COR

>ZMADMAS1

MSATGRAPCGLPRVGLGTAVQGPDPVRAAVLRAIQLGYRHFDTAHYATEAPIGEAAAEEAVRTGLVAS  
REDLFVTSKVCADAHDRVLPALRRTLNLQMEYVDLYMVHWPVMTKAGRFTAPFTPEDFEPFDMRAVW  
EAMEECHRLGLAKAIGVCNFSCKKLETLFSFATIPPVVNQVEINPVWQQRKLREFCRAKGIQLCAYSPLG  
AKGTHWGSVMSDGLVHEIAKSKGKTVAQVCLRWVYEQGDCLIVKSFDEGRMKENLDIVDWELSEEERQ  
RISKIPQRKINQGRRYVSEHGYPYKSFEELWAGEI

>PSOCOR

MESNGVPMITLSSGIRMPALGMGTAETMVKGTREKLAFLKAIEVGYRHFDTAAYQTEECLGEAIAEAL  
QLGLIKSRDELFIITSKLWCADAHADLVLPALQNSLRNLKLDYLDLYLIHHPVSLKPGKFVNEIPKDHILP  
MDYKSVWAAMEECQTLGFTRAIGVCNFSCKRLQELMETANSPPVVNQVEMSPTLHQKNLREYCKANNIMI  
TAHSVLGAVGAAWGTNAVMSKVLHQIAVARGKSVAQVSMRWVYQQGASLVVKSFNARMKENLKIFDWE  
LTAEDMEKISEIPQSRTSSAAFLLSPTGPFKTEEEFWDEK

>AMECOR1

MEEVIGLETVPKVTLSSSSGDNSMPVIGFGTAASPMADHEITKAAVLVGIENGYRHFDTAAYGTEKAV  
GEAIAEALRLGLIKSRAEVFITTKLWCRSCERDLVPSLKNLQDLQTDYVDLFLIHWPVRLRHDAGRPP  
ISRQDILTFDTKSVWEGMEECHELGLAKNIGVSNFSIKKLEELLATAKIPVLDQVELSPTWHQKNLIEY  
CKEKGIHVTAYSALGANNTHWGNRNVESDVLGEIAKARGKTTAQIALRWVYEQGVSMVKSFNQERMKQ  
NLQIFDFELTEESNKISQFPQHKGVLSAVYGDHDKEMEAEI

>AMECOR2

MENVIPRVTLSGVSMPILGMGTASYPFVSSEEGKLAILNAIKVGYRHFDTASTYMFEEFLGEAIAEAIQ  
LGLIKSRKELFITSKLWCCDAHPDLVPSLRNLSRNLKLEYLDLYLIHFPVSLKAGRYEYPLKEALVLM  
DYKSVWAAMEECQNLGLTKSIGVSNFSCKKLQITLDYAKIPPSVNQVEMNPVWQKKLREFCKANDIVIT  
AYSPLGASGTPWGSSRVLDAQVLHEIARAKGKTHAQVCLRWVYEQVSLLVKTFNEERMKENLRIFDWEL  
TEEDKQKISKIPQHRGLTGDAFVSEHEGAPFKTAEELWDGEV

>AMECOR3

MDMNKHAVVYVPTKVIMGIPVIGFGTSADPPVDFDTRRLAIMQAIENGYRHFDTAALYNSEQPLGEAINE  
AISRGLIKSRDELFIITSKLWCSDTHPQHILPAIQKTLRNLNMEYLDLYLIHWPVSSRHENFEYPIKKEDE  
LPMDFKKVWAAMEECHKQGLAKFIGVSNFSCKKLDNIMASATISPSVLQVEVNPCWQQKRLIDFCKANGI  
FVVAYAPLGAVGTIYGTNRVMESDVLKQIAKKGKSVAVQVCLRWAYEQGIGVVVKSFNKERMKQNLIFD  
WKLSEEDTKKISEIQDRACLGMDYTSYGYPYKTIKQLWDEE

>BTHCOR1

MEIVPKVTLNLSGYQMPLLGFGTAENWPFTKSEAAKRAILCAIKNGYRHFDTASMYQSEESLGEAIVEALH  
LGLIKSRNELFITSKLWCSDCHQDRVLPALRETLKNLHLDYLDLYLIHWPLSAKPGKHEYPILKDKLLPM  
DYESVWGAMEECQRLGLSKSIGVSNFSCKKLEQLLKTAKIIPAVNEVEVNPVWHQKNLIEFCKAKGIVVT  
GYSPLGAKGTTWGTNKVMDSEVLKEIAKTRGKTHAQVCLRWIYEQGVGLVAKSFNEERMKENLEIFDWAL  
TEESKQISQLPQYKQNGETFLSAEGPFKLEELWDEEVAA

>BTHCOR2

MEIVPKVTLNLSGYQMPLLGFGTAENWPFTKSEAAKRAILCAIKNGYRHFDTASMYQSEESLGEAIVEALH  
LGLIKSRNELFITSKLWCSDCHQDRVLPALKNTLQNLQLDYLDLYLIHFPLSSKRGKLEYPLQEDETYP  
DFGSVWEEMKQVRVGLTKSIGVSNFSACKIEHLLTTAKIIPAVDQVEMNPLWQORTLREYCKTKGIVVT  
AYSPLGAKGAIWGSNIVMENEVLAIEIAKAKGKTHAQVCLRSVYEKGVAVTRSYNEERMKQNLNIFDWNL  
SKEETKRIDNLPQKRVLGEGFLSPLGPFKSPEELWDGEM

>CCHCOR1

MMVSVPEVTLQSSSSDKMPIMGMTAAYPFAESDEAKAALLTSIKLGYRHFDTASLYHNEKSVGKAISE  
ALKLGLVKSREDFYINSKLWCSDSHPDRVIPALQESLKKLGLEYLDMYLIHWPLSLKKGSYEFPIPTDEE  
ILPMDFAVWAAMEECQKGLTKSIGVSNFSCKKLETLSTAKIPVVNQVELNTLWQQTKLNKFKCKDNG  
IVLMAFSPGAGSPWGTNRVMECELLHEIAKAKGKTLAQVCLRWIYEQGAGILVKSYNVVRMKENLEIF  
DWELSAEELKSISELPQHRGFPADSLLSAKGPFRTEELWDGEI

>CCHCOR2

MESVACEPGVIEQQQYFIPEVTCGGGSSTTRMRMPVVGMTASYPFAGSEGKQALLHAIKLGYPHFDTA  
SFYQTEQSLGEAISEAIQLGLIKSRDELFIITSKLWCTDAHKDLVLPALQNTLRNLQLEYLDLYLIHFPIS  
LKPGRYDFPVQSKEDLLPMDFKSIWAKMEECQGLGLTKSIGVSNFSCCKLENLLATAKIPPAVNQVEMNP  
LWQQKLRREFCKANGITITAHSPGAKGTNWGTNRVVECEVLHQIAKAKGKSHAQVCLRWVYEQGVSLV  
KSFNKERMKENLGIKFDWELNAEDLKKISEIPQGRGLPVDGFLSPNGPFKSEEEFWDGEI

>CCHCOR3

MPVVGFGTAKFPFGDDEAIKLAVLEGIKLGYRHFDTATKYKSEKPLGETIVEAINLGLIKSRDELFIITSK  
LWCGSTERSLIVPSLKTSLQNLQLDYLDLYLIHWPLRFSTDETPVPKEQLLPFDTKSVWQAMEECQNL  
GLTKSIGVSNFSCCKLEELLSTAKITPAVNQVELNTSWQTKMREFCKGKIHIITGYSPLGSGYGTWGDN  
RVVENQVLEEIGKPRGKTAVQVCLRWIYEQGASMVVKSFNKERMKANLDIFDWKLTEEELKRISQLPQHK  
ASLPTASFGDHDEVRELDYEI

>CMACOR1

MESDSAAAAVVPVTTLSGGIEMPMLGMGTVENFLPGSETVKLALLNAIKLGYRHFDTAAIYQTEECLGE  
AVAEALQLGLIKSRDQLFIITSKLWCSDAHDPDLVIPALQNSLRKLELDLYLVHWPSSKPGNCVFPIL  
KEDLLPLDFKSVWAAMEECQKLGLTKSIGVSNFSCCKLQDLLTSAIIPPVVNQVEMNPRWQQKLRREFCK  
ARDIVVTAYSPLGAKGTVYVYSGAVMDCEVLHQIAKIRGKSAQVSLRWVYQQGVTPLVKSFNEERMKENM  
KIFDWELYEEDLKMIDEIPQSRVNPCYFFLSENGPFKTVVEEFWDGEV

>CMACOR2

MESSNNAVLVPVITLNSGREMPIVGMGTAEENLFGSERVKLALLTAIKVGYRHFDTAAVYQTEESLGEAI  
AEALQLGLIKSRDELFIITSKLWLPDCHHDLVLPALQNSLRKLELDLYLIHWPVSSKPGKIKHVIPKE  
ELLPMDFKSVWAAMEECHKLGLAKSIGVSNFSCCKLQDLLVTANIPPDVNQVEMNPLWQQTKLREFCKAH  
GILVAAYSPLGAKGTAWGRTNGVMDSEVLQIAKARGKSAQVSLRWVYEQGVLLVKSFNKERMKENLK  
IFDWELSGEDLKKISEILPQRRGLPSHVFSDDGPFKSEELWDGEV

>CMACOR3

MESSNNAVLVPVITLNSGREMPIVGMGTAEENLFGSERVKLALLTAIKVGYRHFDTAAVYQTEESLGEAI  
AEALQLGLIKSRDELFIITSKLWIPDCHHDLVLPALQNSLRKLELDLYLIHWPVSSKPGELRSLIPKE  
ELLPMDFKSVWAAMEECHKLGLTKSIGVSNFSCCKLRDLLTANIPPAVNQVEMNPLWQQKLRREFCKAN  
GIVIAAYSPLGAKGTAWGRTNDGVMDELLQIAKARGKSTAQVSLRWVYEQGVILLVKSFNKERMKENL  
KTFDWELSGEDLQINEILPQRRGHSHEFISDNPFKSEELWDGEV

>CMACOR4

MGEEMIKTSSVEIPVATLSTGRTPMLLGMGTAAYPFVSDGVDVVKAILHAIKLGYPHFDTAALYFTEECLG  
DAVAEALRLGLIKSRDELFIITSKLYCCDAHPDRVVPALQNSLRKLELDLYLIHWPASTHEGNFEPFL  
QKQDILPLDFKSVWAAMEECQKLGLTKSIGVSNFSCCKLQDLLASAKIPPAVNQVEMNPIWQQNKLREFC  
KANDIHIITAYSPLGANGTPWGSSGVAETQVLHDIKARGKTHAQVCLRWVYEQGVSVLVKSYNEERMKEN  
LAVLDWELSEENLKKISEIPQRRGLPGDIFVSDNGPFKTVVEELWDGEV

>CTRCOR1

MPVVGMLAAYPFQESEVVKLAMLRAIEMGYRHFDTAALYQTEQSLGLAIAEALELGLIKSRDELFIITSK  
LWCSDAHPLVLPALQRTLKNLGLDYVDLYLIHWPVSSNPKPGKYDFVPKEELVQMDYESVWAAMEEGHR  
LGLTKSIGVSNFSCCKLENLLTIAKVPPTVNQVEMNPFWRQYKLEFCKEKGIITAYSPLGAKGTIWT  
NKVMESKVLLEDIGIASGKTLAQVCLRWVYEQGVTLVKSFNKERMKGNLDIFDWELSEKELKINEIPQS  
RGLPGDIFVSDGPFKSEAELWDGEV

>ECACOR1

MGSCSIPVKSLSGGREMPVIGMTADSNLAGSDASRIALVKAIEVGYRHFDTASIIYQSEQLGDIAIAQAL  
ELGLIKSRDELFIITSKLWSSDSHPDRVVPALQESLRKLELDLYLIHWPASTPGIYEFPIPKDEIFP  
LEYETIWAAMEECQRLGLTKSIGVSNFSSKQLQTIINTATIPPAANQVEMNPPVWQQKLEFCDANNILL  
TAYSPLGAKGTSWGSNKVMESEVLKQIAMANGKSAQVSLRWLYQIGATMVVKSNAERMKENLKIFDWE  
LSDEDMKAISEIPQRRNFAGDILISSNGPFKSEDELWDGEV

>ECACOR2

MSSYGSVPMKSLNSGSKIHVLFVGFATAAYPFVSDGVDVKNAILNAIKLGYRHFDTAALYFTEESLGEAVSEA

LQLGLIKSRDEL FITSKLWISDAYPDRVLP AIQKTLRNLKMEYLDLYLIHWPI SGKEGNFDLPVPKDCLO  
ELDYKPVWAAMEECQKLG LTKSIGVSNFSCCKLQIILSSATIPPAVNQVEMNPIWHQKKLREFCKANNIM  
IAAYSPLGAAGTPWGS SGGVETEVLHEIARSRGKTHAQVCLRWVYEQGVIVLVKSFNEERMKENLSVFDW  
ELTDEDLKKISQIPQRRGLPSGDIWVSTEGPFRSEEELWDGEI

>GFLCOR1

MEMSSAQVVPLMTLNSGKEIPVLGMGTAENHFQSGDGT KDALVNAIKIGYRHFDTA AIYNVEECLGDAIA  
EALQHGLIKSRDEL FITSKLWISDHPDRVLFALQNSLRK LKLEYLDLYLIHWPLSSTPGKSVFPVKED  
FLPLDFKSVWAAMEECQKLG LTKSIGVSNFSCCKLQD LLDIANIPPAVNQVEMSPWQQKKLREFCKVNG  
ILVTAYSPLGAKGTFWGSNEIMDSHVLQEIAKARGK SVAQVTLRWVYEQGVILLVKSFNENRMKENMAIF  
DWDLSIDDLKKFDEISQRRGNLGDFFVSENGP FKSVDMLWVDGEV

>GFLCOR2

MESSSSAVVVPVMTLNSGKEMPVLGMGTAENNLQ GSEKTKLALLTAIKAGYRHFDTASAYNTEEALGEA  
VAEALQLGLIKSRDEL FITSKLWCSDAHPGLVVPALQNSLRNLKLEYLDLYLIHWPVSLKPGKFVIPFSK  
EDILPLDFKNVWAAMEECQKLG LAKSIGVSNFSCCKLQD LLAIANIPPAVNQVEMSPWQQKKLREFCKV  
NGILVTAYSPLGAKGTFWGSNEIMSDVNLQIAKARGK SVAQVSLRWVHEQGVILLVKSFNENRMKENMA  
IFDWELSNDDLKMD EISQRRGPLADIFVSENGP FKSVDMLWDDGGF

>GFLCOR3

MGSSDAVVVPVKTLSGRKMPVIGMGTA EILLVDGSEKVKLALLNAIKIGYRHFDTAAVYRTEEALGEVV  
AEAIQLGLIKSRDEL FITSKLWLS DSHPDVLPALQNSLRK LKFEYLDLYLIHWPLSSKPGELKVLIPKE  
ELLPLDFKSVWAAMEECQKLG LTKSIGVSNFSCCKLQD LLDIANIPPAVNQVEMNPLWQQKKLNEFCKAN  
DIVITAYSPLGAKGTPWGSNRVMDSEVLNQIAKARGK SVAQVALRWVYEQGVSLVVKSFNEERMKENVTK  
IFDWELSAEDLKKIEEIPQCRGVP SHVFSVNGP FKSVEELWDGEI

>GFLCOR4

MGEEMKIKSVEIPVVTLSGRTMPVFGMGTA AAFPVGS DGVVKAITHAIKLYRHFDTAALYFTEESLGD  
AIAEALRLGLIKSRDEL FITSKLWCCDAHPDRVLPALRNSLRNLKIEYLDLYLIHW PASTHEGNLEFPIQ  
KQDIHPLDYNSVWAAMEECQTLGLTKSIGVSNFSCCKLQHILAI AKIPPAVNQVEMNPIWQQKKLREFCK  
ANDIHITAYSPLGANGTPWGS SGGVETQVLHDI AKARGKTHAQVCLRWVYEQGVIVLVKSYNEERMKENL  
TVFDWELSAEDSMKISEIPQHRGLPGDIFVSDSGP FKSVEELWDGEV

>HCACOR1

MGSVPNVILSSGHPMLVGFGTAGFPFGTSEGIKSAILCGIKNGYRHFDTASVYQTEQILGEAIAEAL EL  
GLIKSRDELFLT SKLWCSDAHQHVLPALQKTLRTLQLDYLDLYLVHWPLSSKPGKYEYPIPKEELLPM D  
FKSVWAAMEECQALGLTKSIGVSNFSCCKLEQLLSTSNIPPAVNQVEVNP IWQQNKLREFCKAKGIIVAA  
FSPLGAKGTSWGTNKVMDSEVLNEIAQARGKT TAQNCLRWLHEQGVCVVVKSFNEERMKG NLKLFDWELS  
KEESKKISQLPQSKGHTGDDMVSANGP FKSLEELWDGEI

>HCACOR2

MTRIPLEIVLNSGWRMPVLGMGTATFP IQSPEVIESSIVNAIELGYRHFDTASVYQSE SPLGRAISEAIRR  
GLIESRKEVFITSKLWCTDAH HDLVIPALHKT LQNLGLELDLYLIHFVRLKGDISFDIKKADLIPFDV  
KGTWEAMEKCQELGLTRSIGVSNFSSK KLSSELLTHATISPAVNQVEMHFPWQQKELRAFCADKGIHVSAY  
SPLGGKGALWGS DILLNSKEIERIAQAKGKSIAQVCLRWAYEQGVSYLPKSYNKGRMKENMEIFDWQLSE  
DELQKISHLPQGKIYTGHHFISDDGEYKSPIDLWDCEIC

>HCACOR3

MGIVREVV LNSGERMPLLGMGTATYPVAPFELV ESSVIAAIELGYRHFDTASVYETE QPLGLAISEAVRQ  
GLIASRDEIFITTKLWCGHAHYDLVLPALRDSLETMGLDYVDLYLIHF PARFNMKEKSLNVNKKDLLPLD  
IRGTWKAMEECYELGLAKSIGVSNFSCCKLSQLLSVANIPPAVNQVEMHPLWQQKKLREFCEEKGIH VSA  
YSPLGGKGTIWGSNAVLDS DQIKQIAKAKGKSIAQICLRWGF EHGVSILPKSFNKERLKENMEIFDWELS  
KEELQKMNTFPQNRIFQA EHLVSPDEGLFKSVADLWDGEI

>JDICOR1

MCFCVLVTKRAMGIVPEVTLNSGHQMPLVGFGT AQFPFPEGDEAKQIIAPILCGIKSGYRHFDTASLYKT  
EEALGEA IKEALRLGLIKSRDEL FITSKLWCTDSHQDLVLPALKKT LQNLQMDYLDLYLVHFPVSSKPGK  
PEFPPQKEDLLPMDFGSVWAAMEECQRLGLTKSIGVSNFSCCKLEQLLTTAKIIPAVNEVEMSPVCQONK

LREFCKVKNIVVTAYSPLGGGSNAVKDNKVLKEIAKAKGKTCAQVTLRWVYEQGVALVPKSFNEGRMKEN  
LDIFNWTISEEEFKQISQLPQGRVATGEWVFSVEGPFKSLEELWDEVI

>MAQCOR1

MGVVPVVTLNSGHEMPLVGFGTAVPAFGGSDAIKQAILCGIKNGYRHFDTASVYQTEKSLGEAIVEALRL  
GLIKSRDELFIITSKLWCTDAHQDGVLPALRETLKNLQLDYLDLYLIHWPLSAKPGKHEYQIPKDELLPMD  
YESVWGAMEECQRLDLSKISIGVSNFSIKKLEELLKTAKIIPAVNEVEVNPVWHQNKLIIEFCCKAGIVVTG  
YSPLGAKGTTWGTNRVMDNEVLKEIAKTRGKTHAQVCLRWIIEYEQVGLVAKSFNEERMKENLEIFDWALT  
EEESKQISQLPQYKQNGETFLSAEGPFKTEELWDEEIAA

>MCACOR1

MASVPEVTLSSGHPMPLFGFGTAAPFVSSEGAKSAILCGMELGYRHFDTASIIYGTESLGEAIAEALKL  
GIIKSRDELFIITSKLWCCDGHDRVLPALQMTLKNLQLDYIDLYLEHWPLSSVPKGELEYPIPKKLFPM  
DLKAVWEAMEECQRLGLTKSIGVSNFSCKKLELLAFKIPPAVNEVEMNPVWQQKLRDFCKAKGIVLT  
AYSVLGAKGTLWGTNKVMDSEVLGKIAKARGKTVGQVCLRWAYEQGACVLVKSFNEERMKENLETFNWEL  
GEEDLKMISEIPQYKGLRGEDMVAPNGPYKTEELWDGEI

>MCACOR2

MGVDKTNEFNSNGAASPVLKEANLFKIAEVTLNSGHHMPVLGTGTASFPPPLKELKKAIVEAMEVGYR  
HFDSAALYQSEEGLAGAIAEAELEKGLVKKREELFITTKLWCNNAHSDRVLPAIRESLRKLRDLYVDLYLI  
HFPVRLKEDLLDMNCKKGGIFELDLKSVWAAMEQIQHLGLAKSIGVSNFTCKKLDLLSYAKIPPAVNQV  
EMHPVWQQKLRDFCKEKGIVHSAYSPLGAKQWGFVVLGNKILKEIAQDKGKTIAQIALRWGYEQGVIL  
IPKSFNKGRLTENLRIFDWKLTEDELKISSIQQSRVAIMPEFVFPESPFTFEDFDWGEI

>MCACOR3

MEGGVPKILLNSGHRMPLVGMGTASFPISPQHLVKSSILTAIELGYTHFDASVYETEPTLSRAIRQAL  
EGRHIASRDQLFITTKLWCGQAQSDLVVPALRESLQELGLDYVDLYLIHFPAFKVEKTFNVTKEDLLP  
LDMKGTWQAMEECCKLGLAKSIGVSNFSCKKLSQILTFATIPPAVNQVEMHPLWQQRKLRDFCKEKGIVH  
SAYSPLGGKGAWGSNAVFEEIEKQIAEAKGKSLAQICLRWAFEQGVSVFPKSFNKERLKENMEIYGWE  
LSKEELQKLSVLPQCRIFKGEWLVADHGVSFKSVEDLWDGEI

>NDOCOR1

MVSVPEVTLNSGHRMPLVGMGTACFPLPGSEVVKSAMVTAIKLGYRHFDTAALYQSEQPLGEAIAEALHL  
GLIISRDELFIITSKLWCTDAHQDLVLPALKTSLRNLQLDYLDLYLIHFVPSLKPQKIQLPVPKEELLPMD  
FKSVWAAMEECQKLGLTKSIGVSNFSCKKLEHILSLAKIPPAVNQVELNPIWRQKLIIEFCCKAGIVVTA  
YSPLGAVAPGQGSNRVMECEVLSEIAKARGKTHAQVCLRWIIEYEQVSLVVKSFNEDRKKKNLEIFDWELS  
EEDSKKISQIPETRGNPGDFVISVDGPYKSREELWDGEI

>NDOCOR2

MGRVPETTLSSGHNMPLLGMGTATFPLPPELIESYILAAIEMGYRHFDTASVYDTEVPLGRAISEALRR  
GLVANRDELFIITTKLWCGHAHPDLVVPALHQSLMEMGLEYYVDLYLIHFPAFVNKKEKNFDVKKEEVIPLD  
MKGTWEAMEECCKLGLAKSIGVSNFSCKKLSQLLTYATIPPAVNQVEMHPLWQWKLREFCVANDIHTA  
YSPLGGKGAWGSNSVLDSEIKQMAEAKGKSIAQICLRWAFEQGVSFIPKSFNVERLKENMEIFDWEMN  
KNELLKMSLLPQKRTFTAAYLVSPDGAFKSVDDLWDGEI

>NSACOR1

MARVPEITLNSGHRMPLVGMGTAVVPFKEPEPVKSAILTAIKNGYRHFDTASLYRTEPALGDAIAEALQL  
GLINSRDDLFITSKLWCTDNHPDLVLPALHTTLRNLKLDYLDLYLIHWVPSMTPGRIRFPGPDEKILPMD  
YKSVWAAMEECQKLGLTKSIGVSNFTCKKLELLASATIPPAVNQVEVNPMMWQKLEIEFCRTKGIVVTA  
YAPLGTGTFIGNNDIMNCELLKEIAQAKGKTNGQICLRWVHEQGVGLLVKSFTEVRMKQNLEIFDWELS  
EEESMKIKQLPQRKSHQKGFVTADGPFKSLTELWDGEM

>NSACOR2

MVYEIMLNSGYRIPLLGMGTAAYPVPPPELVESVLAALIELGYRHFDTAHIYGTAPLGRAISEALRKGL  
IKSRDELFIITTKLWPGHARPDVLQALHQSLLEALRIDYVDLFIHFPAHYNTTEIRMDIKKEDILPLDIK  
GTWQAMEECCKLGLAKSIGVSNFGCKKLSQLLDSATIPPAVNQVEMHPLWQQAALREFCAERGIHVSAYS  
PLGGKGTWGSNAVLDSEIKQIALAKGKSVAQICLRWGFQQGVSIIAKSFNRERLKENMEIFDWELNKE  
ELYKLSILPQNRISTLEYLVSPDAVFKSINDLWDEEV

>NSACOR3

MDNSVVVLNSGHRMPLLLGMGTAATPLPPNEVVQSSVLA AIELGYRHFD TASVYGSEVILGRAISEALRRG  
LVASRDEL FITTKLWCGNGHPDLVLGALQESLRIMELDYVDLYLIHFPVRFNITEKLLNMKNVPLLPFDM  
EGTWQAMEECCRLGLAKSIGVSNFSCKRLSELLLSASIPPAVNQVEMHPLWQQRNMFRCRKEGIHVSA  
SPLGGKGAAWGSNAVL DSEDIQQIAQHKEKSAQVCLRWAF EQGVSIIVKSFNKERLKENTQIFDWELNK  
QELQRINTLPQNKIFKASNLISADGPYKTFEELWDGEV

>PBRCOR1

MESNGVPMITLSSGIRMPALGMGT VETMEKGT EREKLAFLKAIEVGYRHFDAAAAYQTEECLGEAIAEAL  
QLGLIKSREEL FITSKLWCTDAHADLVLPALQNSLRNLKLEYLDLYLIHFPVSLKPGKIVSDIPKDQMLP  
MDYKSVWAAMEECQTLGFTRAIGVSNFSCKKLQELMATANSPPVVNEVEMSPIFQQKLRAYCKANNIMI  
TAYSVLGARGAAGSNAVMDSKVLHEIAVSRGKSVAQVSMRWVYQQGACL VVKS FNEERMKENLKIFDWE  
LSAEDMEKISEIPQSR TSSADFLSPTGPFKTEEEFWDEK

>PBRCOR2

MEINGVPVITLSSGVRMPALGMGTAETMEKGTDRERSAFLKAIEVGYRHFD TAAAYQTEECLGEAIAEAL  
QLGLIKSRDEL FITSKLWCTDAHADLVLPALQNSLRNLKLEYLDLYLIHAPVSLKPGKILNEIPKDQMLP  
MDYKSVWAAMEECQTLGFTRAIGVSNFSCKKLQELMATANSPPVVNEVEMSP TLHQNLREYCKANNIMI  
IAYSVLGARGTGWGSNAVMDSKVLHQIAVARGKSVAQVSMRWVYQQGACL VVKS FNEERMKENLKIFDWE  
LTEEDMDKISEIPQSR TSSADFLSPTGPFKTEEEFWDEM

>PBRCOR3

MRNTGVPVITLSSGKIPVLGMGT FETVKGGERERLAF LKAIEVGYRHFD TAAACYQTEECLGEAIEEAL  
QLGLIKSRDEL FITSKLWCTDAHDPDRVLLALQNSLRNLKLEYLDLYLIHFPVSLKPGNEVTMDAAGGEIF  
LMDYKSVWAAMEECQNLGFTK SIGVSNFSCKKLQELLATANIPPVVNQVEMSPV FHQNLREYCKANNIL  
VAAYSILGGKGTAWGSNSVLGSEGLNQIAIARGKSIAQVSMRWVYEQGAILVVKS FSEKNMRENLNIFDW  
ELTKEDLERIGEIPQRRLIIQEFMVSSNGPFSLEEFWDEKAD

>PBRCOR4

MENVIPAVTLSSGSVMPILGMGTAAYPLVEPEEAKLAFLNAIKIGYRHFD TAAASYHCEGFLGEAIAEALQ  
LGLIKSRDEL FITSKLWPCDAHDPDLVIPAIQNSLRNLKLEYLDLYLIHFPVISTKPAAGLVFPKDALLP  
MDYKSVWAAMEECQKLGLTKSIGVSNFSCKKLQTILDIANIPPAVNQVEMNPVWQNLKLRDFCKANNIVL  
TAYSPLGARGTPWGSNAVYEERVLHEIAEAKGKTHAQVCLRWVYEQGVS LIVKSFNELRMKENMMIFDWE  
LTEDELQKIGKIPQRRGLPGDFFVSEAAPFKTVEEFWDGEI

>PBRCOR5

MEVVIPKVALSSGRVMPVLGMGTSSFPVGPEDGKAAILNAIKIGYRHFD TASVYKSEDFLGEAIAEALL  
LGLIQSRDQLFITSKLYCND AHPDLVVPALQNSLRNLRL EYLDLYLIHFPVSSKPVKYEYHLKKEHLLPM  
DYESVWAAMEKCKLGLTKSIGVSNFSCKKLQTILDTANISPAVNQVEMNPVWQNLKLRDFCKAKGIVVT  
AYSPLGASGTPWGSNAVKEAQELHEIAKARGKTHAQVCLRWVYEQGVSLLVKS FKEERMKENLMIIFDWEL  
TKDDLFKISKITQRRGLPGYRFISKLEGS PFKTVEEFWDGEV

>PBRCOR6

MESSGVPVITLRSGKVMPVLGMGT FEKAGKGSERERLAILKAIEVGYRYFD TAAAYETEEVLGEAIAEAL  
QLGLIKSRDEL FISSMLWCTDAHDPDRVLLALQNSLRNLKLEYVDLYMLPFPASL KPGKITMDIPEEDICP  
MDYRSVWSAMEECQNLGLTKSIGVSNFSCKLEELMATANIPPAVNQVEMSPAFQKKLREYCNANNILV  
SAVSILGSNGTPWGSNAVLGSEVLKKIAMAKGKSVAQVSMRWVYEQGASLVVKS FSEERLRENLNIFDWQ  
LTKEDNEKIGEIPQCRILSAYFLVSPKGPFSQEELWDDKA

>PBRCOR7

MGSSCIPVLT LNSGNKMPVLGMGT FETFAKGERERLAYLKAIVGYRYFD TGAAYGTEEVLGQAI A EAL  
QLGLIKSRDEL FISTMIWATDAHDPDGLPAVQRSLRNLKLDYVDLYLIPFPASLNPEGEIPNYIPENETF  
LKMDYKSVWAAMEECQTLGFTK SIGVSNFSCKKLQEV METANIPPAVNMVEMNPTFQQKYLREYCKANNI  
LVNAYSVLGSTGTSWGSNAVMGSEVLKQIATDIGKSIAQVSMRWVYEQGAGFVVKS FSEERMRENLNIFD  
WELTKEDLEKISQIPQCRVLPMDFLVSSDGAFKSLEDLWDGEA

>PBRCOR8

MPILGFGTAENLFEGGDKVLA I LKAIEVGYRYIDTAAVYRTEESVGEAVAEALQLGLIKSRDEL FITSK

LWGVAHPDLVLPALQNSLRKLELDLYLIHYPVSLKPGEMVDDIPKDEIFPLDYKSVWAAMEECQKL  
GYTKSIGVSNFSCKKLQQLMATANIPPAVNQVEMNPTWQQKNLREYCKANNIFITAYSTLGAKDLLWGSN  
AVLGSKVLNQIAVARGKVAQVSLRWVVEQGVSLVVKSFNEERMKENLKIFDWELTTEDLKMISEIPQRR  
VATADFFVSDIGPFKSLEELWDE

>PBCOR9

MPVLGLGTAENLTKGSEREMLAILEVGYRHFDTAFIYQQTQECVGEAIAEALQLGIIKSRDELFIITSK  
LWGSDAHPCVLLALQNSLRNLKQYLDLYLIHYPVSLKPGTTLKDLGNKDNFLPMDYKSVWAAMEECQK  
LGLTKSIGVSNFSSKKIQELMSTDSIPPAVNQVEMNPTWQQKREYQANNILVTAYSPLGAKGTTWGS  
NAVGMSEVLNQIALARGKVAQVSLRWVVEQGVSLVVKSFNEERMRENLKIFDWELTAEDLKKIDELPQS  
RVATAEFVSENGPFKSLEEFWDDDES

>PBCOR10

MENAIPAVTLNSGSVMPVLMGTAAYPFVESEEAKLAILNAIKTGYRHLDTAALYQSEESLGEAVSEAIQ  
LGLIKSRDELFIITSKLVPCDAHPLVIPAIQNSLRNLKLELDLYLIHFPISTKPAAGLVFPPPKDALLP  
MDYKSVWAAMEECQKLGLTKSIGVSNFSCKKLQITILDIANIPPAVNQVEMNPVWQNLQLRDFCKDKSIIL  
TAYSPLEGKGTWGSNAVYGAQVLHEIAEAKGKTHAQVCLRWVVEQGVSLLVKSFNDQRMKENMMIFDWE  
LTEDELEKISRIPQRRGLPGDFFVSEAAPFKTVEEFWDGEI

>PBCOR11

MENAIPAVTLNSGSVMPVLMGTAAYPFVESEEAKLAILNAIKTGYRHLDTAALYQSEESLGEAVAEAIQ  
LGLIKSRDELFIITSKLVPCDAHPRVPTLQNSLRKLELDLYLIHWPVSSNPVAGHVLSPKDSLVT  
MDYESVWAAMEECQKLGLTKSIGVSNFSCKKLQITILDIANIPPAVNQVEMNPVWQNLKLRDFCKANNIVL  
TAYSPLGARGTPWGSNAVYEERVLHEIAEAKGKTHAQVCLRWVVEQGVSLIVKSFNELRMKENMMIFDWE  
LTEDELQKIGKIPQRRGLPGDFFVSEAAPFKTVEEFWDGEI

>PBCOR12

MENVIPAVTLSSGSVMPILAMGTAAYPLVEPEEAKLAFLNAIKIGYRHFDTAASYHCEGFLGEAIAEALQ  
LGLIKSRDELFIITSKLVPCDAHPLVIPAIQNSLRNLKLELDLYLIHFPISTKPAAGLVFPPPKDALLP  
MDYKSVWAAMEECQKLGLTKSIGVSNFSCKKLQITILDIANIPPAVNQVEMNPVWQNLQLRDFCKDKSIIL  
TAYSPLEGKGTWGSNAVYGAQVLHEIAEAKGKTHAQVCLRWVVEQGVSLLVKSFNDQRMKENMMIFDWE  
LTEDELEKIGKIPQSRGLPGDVFVSELEAAPFKTVEEFWDGEV

>SCACOR1

MENVSVVTLNSGREMPIILMGTAAYPSVGSEEAAILLAIKVGYRHFDTAAAYQIESSLGEAVAEALQL  
GLLKSDELFIITSKLVCSDSHPERVLPAQNSLRNLKLELDLYLIHWPVSLKPGNFDLTIPKEDLLPMD  
YKSVWAAMEECQKLGLTKSIGVSNFSCKKLQDLLATANIPPAVNQVEMNPIWQQKREFCKANGILITA  
YSPLGANGTPWGSNGVANTEVLHQIAKARGKTHAQVCLRWVVEQGVSLLVKSFNEERMKENLKIFDWELT  
AEDLKQISEIPQHRGLPADIFVSVNGPFKTVVEEFWDGEV

>SCACOR2

MEISVPITTLSSGREMPIILMGTAENLFGNSEKVKLAILDIAIKVGYRHFDTAAVYQTESSLGEAVAEALQ  
HGLLKSDELFIITSKLVCSDSHPDRVLPALQTSRRLKLELDLYLIHWPLSSKPGSHDYIPKEDLLPL  
DYKSVWAAMEECQKLGLTKSIGVSNFSCKKLQDLLATANIPPAVNQVEMNPLWQQKLEFCKNGIIIT  
AFSPLGAKGTSWGATNGVMDSEVLHQIAQARGKSIAQVSLRWLYEQGVSLVVKSFNVERMKENLKIFDWE  
LSAEDLKKINEIPQRRGLPSGSFISANGPFKSEELWDGEV

>SCACOR3

MAMETVPKLPPLSSGDNIPVIGFGTAAPLPDDETLKSAFLNGIEAGYRHFDTAAAYGSEKALGEAITEA  
LRLGLLKSREEVFITTKLVCSSESLVVPVSLKNSLRNLQMEYVDLFLIHWPVRLSIDAQRPPPIPREQIL  
TFDTKSVWEGMEECHELGLAKNIGLSNFYPPKIDELLATAKIPPAVLQVELSPTWQQKLIIEYCREKGIL  
VTAYSALGANGTHWGDNRVVEDVLGDIKARGKTTAQIALRWVVEQGVCMVVKSFNKERMKNLQIFDF  
ELTEESNKISQLPQIKGVKLSPMFGNHVDLKELEDQL

>SCACOR4

MGEEMKCGRVVPVATLNSGRTPMLLMGTAAYPFVSGSEKVKSAIHLAIKGYRHFDTAAALYQTEECLGEV  
VAEALQLGLLKSDELFIITSKLVCSDSHPDRVLPALQTSRRLKLELDLYLIHWPLSLKPGNYGFPIPK  
EDMLPMDYKSVWAAMEECQKLGLTKSIGVSNFSCKKLQDLLATANIPPAVNQVEMNPIWQQKREFCEA

NGILITAYSPLGANGTPWGSSGVAQTQVLHDIKARGKTHAQVCVRWVYEQGVSVLVKSYNEERMKENLT  
VFDWELDVEDLKKISTEIPQRRGLPSDIFVSVLTGPFKSAEELWDGEL

>SDOCOR1

MESDSTAVAVPVTTLSSGIEMPMLGLGTADEKLLPSSETVKLAFLTAIKLGYRHFDTAAVYQTEECLGEA  
VAEALQLGLIKSRDELFIITSKLWCSDAHPDLVIPALQNSLRKLELDLYLIHWPLSSKPGNCFPIPK  
EDLLPLDFKSVWAAMEECQKLGTLKISGVSNFSCKKLQDLLAMAIIPAVNQVEMNPHWQQKCLRFECKV  
KDIVVTAYSPLGAKGTPWGSNAVMDSKVLHQIAKARGKSAQVSLRWVYQQGVVLLVKSFNEERMKENMK  
IFNWELNEEDLKMIDEIPQCRGNPSHYVSENGPFKTVVEEFWDGEV

>SDOCOR2

MPIVGMGTAENLFECSERVKLALLTAIKVGYRHFDTAAVYQTEGSLGEAIAEALQLGLIKSRDELFIITSK  
LWIHDCHDLVLPALQNSLRKLELDLYLIHWVSSKPGELRSLIPKEELPMDFKSVWAMEECHKI  
GLTKSIGVSNFSCKKLQDLLTANIPAVNQVEMNPLWQQKCLRFECKANGIVIAAYSPLGAKGTLWGT  
NGVMDSEVLQIAKARRKSIAQVSLRWVYEQGVVLLVKSFNEGRMKENLKIIFDWELSREDLKQINEILPQ  
RRGLPSHFVSDDGPFKSEELWDGEV

>SDOCOR3

MTMEAVPKVTLSTSGKSMPIIGFGTALFPTGNDEAVKSAVLSGIEAGYRHFDTAVAYRSEKGLGEGIAEA  
LRLGLILSRDEVFITTKLWCTSCERSLVVPSLKNLRLQMEYVDLFLIHWPLRLSADAQRPPIRNDQIL  
HFDTKSVWEGMEECYELGLAKNIGVSNFYPPKIDELLATAKIPAINQVELNPAWNQKDLIKYCKSKGIL  
ITAYSALGANGTHWGDNRVVDSDVLKDIKARGKSTAQVALRWVYEQGVSMVVKSFNKERMKQNLQIFDF  
ELTEESNKISQLPQHKGVKLTVPYGDHDAMKKIDNEI

>TCOCOR1

MVSVEVVLNSGHLMPVVGMAAYPFQESVTKQAMIRAIKMGYRHFDTAALYQTEKSLGDAIVEALKL  
GLIKSRDELFIITSKLWCSDAHPHVIPALQRTLRLNGLEYLDLYLIHWVSSSEPGKYEFVPRKEELILMD  
FENVWADMEEGYRLGLTKSIGVSNFSCKKLESLLTMAKIPAVNQVEMNPLWRQNKLLRFCKDKGIAITA  
YSPLGAKGTIWTNRVMESEVLNDTANAREKTLAQVCLRWVYEQEVSILVKSFNEERMKENLDIFDWKLS  
DEDLEKINEIPQCRGLPGDIFVSDDGPFKSEELWDGEI

>TCOCOR2

MVGVNKENVVSSVATVPVVTLSNGHKMPVLGTGTASFPVPLEELKKVIMEAMEVGYRHFDTAAMYQSEE  
GLGAAIKEALEKGLIKSRDELFIITTKLWCNNAQPHLVLPAIRDLSRRLRLEYVDLYLIHYPVRLKEDLLS  
MDCKEDEIFPIDIKSVWSAMEEIHNLGLAKSIGVSNFTCKKLTDLAHAKIPAVNQVELHPAWQQKLR  
EFCQEKGIQVSAYSPLGAKQWGFVVLNKNIIKEIAHHKGTVAQIALRWGHEQGIILIPKSFNKERLIQ  
NLLIFDWELTQDELKMASIQSRIAIAPFVFPSPFKSFEFWDGEM

>TCOCOR3

MGISMPDATLNSGHRIPLIGFGTASFPFPLEGSETATRAILEAIKIGYRHFDTAALYQTEVGLGEAIEEA  
LHLGLIESRDELFIITSKLWCTHGRPERVLPAIRESLKNLKDLYLDLYLIHMPMSFKSEKPFPLPGEFEA  
MDFKSVWEQMEACQLGLARSIGVSNFSCKKLQILTTANIPAVNQVEMNALWQQNKCLRFECKSEGIVI  
TAYSPLGGKGTWGSNRVMECEVIKEIATEKGKTHAQVCLRWLYEQGVSMVVKSFNKERMKENLEIFDWE  
LTSKECEQIKKLPQSRGFTAQGLVSEDGPFKSIEDIWDGEI

>TFLCOR1

MRRPHSRLASTRDMSSIVPDVVLSSGHKMPVIGFGTVAYPIAASDSIKTAIVNGIKHGYRHFDTASVYQT  
EQLLGEAIAEALQFGLIKSRQELFIITSKLWCSDSHHDRVLPALQNTLKTLDYLDLYLVHWPISSKPGK  
HEFPIPKKEELLPLHFESVWTAMEECQAVGLTKSIGVSNFSSKKLEQLLSTSKIIPAVNQVEMNPIWQQYK  
LRFCKSKGIVITAFSPLGAKGTSWGTNKVMDSEVLNEIAQAKGKTHAQVCLRWLHEQGICVVVKSFNEE  
RMKENLEIFDWELSPESALIQQLPQSRGNTGEDFISVDGPFKSLLEELWDGEI

>TFLCOR2

MGSIPVSLNSGHRMPLIGMGTASYPFAGSEVVKSAILSAIKLGNRHFDTAALYKTEQIIGEAIAEALQL  
GLIKSREELFITTKLWVNDGKDCILPALQTSKLNQLDYVDLYLIHWVPCIPPGELRMPGPNKVLPID  
YASVWEAMEECQRHGLTKSIGVSNFTCKKLELILASAKIPAVNQVEVNPLWRQEKVIRFCKDRGIAVTA  
YSPLGTAGSDFMGNRNVVQSELLKEIAKATGKTHAQVCIRWVFEQGVGVIVKSFKEMRLEENIDIFDWEL  
SKEDSLKISRLPESKGYPGHGFIRVEGPFKSLLEELWDGEI

>XSICOR1

MGSVPEITLNSGHSMPVLGLGTASVPFAGYEVVKSAILS SAIKLG YRHFDTAALYRTEQPLGDAIAEAIRL  
GIIKSREELFITSRPWLNDTHDRILPALQTTLQNLQLDYLDLYLIHWPLSIKPGNIRFPGPDEKILPMD  
FESVWAAMEECQRLGLTRSIGVSNFSCKKLEKILASATIPPAVNQVEVNPLWRQEKLIQFCKSKGIVITA  
YSPLGTVGSSVFQGNNNIMECEVLKEIAGNRGKTHAQVCLRWVVEQGVCLLVKSFNEARLKENMEIFGWAL  
SEEEANQINQLPQGRGYPGHNFITPDGPFKSEEELWDGEI

CXE

>AERCXE

MNSDHLETTGSSDPNTNLLKYLPIVLNPDRTITRPIQIPSTAASPDPTSSSPVLTKDLALNPLHNTFVRL  
FLPRHALYNSAKLPLVVYFHGGGFILFSAASTIFHDFCCEMAVHAGVVIASVDYRLAPEHRLPAAYDDAM  
EALQWIKDSRDEWLTNFADFSNCFIMGESAGGNIAYHAGLRAAA VADELLPLKIKGLVLDEPGFGGSKRT  
GSELRLANDSRLPTFVLDLIWELSLPMGADR DHEYCNPTAESEPLYSFDKIRSLGWRVMVVGCHGDPMID  
RQMELAERLEKKGVDVVAQFDVGGYHAVKLEDPEKAKQFFVILKKFVVDSCCTKL

>AMECXE1

MAENNSSIITNVTNPYEYLKIVHNSEDDTLTRLDVPITNPITNVQNC DIPLNIQHKTWIRLFKPPQL  
QQQKSSKKDDEFKSLSNQSFPLIIYFHGGGFIMNSAASNYEHVFCFVTTTRIPAFIASVEYRLAPENR  
LPAAYDDAVEALNWNQALDTINGEQWLRNFVDFSKCFIMGCSAGGNIAYHACLRTLELDLEPIKISGF  
ILNQPYFGGLRRTSELERL INNWMLPLVINDLMWELSLPIGANRDHVYCNPMVDIDNSSSTILGLVKKLG  
LIRMKCLVIGCDGDPIDRQIEFVKLLKEKGMVESCIEEGGFHGVGFSCPEKTDEL CVKLDKDFILGTY

>BTHCXE1

VDQSQSQTPINPYNLLGLVHNSDDTLTRLISPTCRYEDDQSIIQDIPLNTAHKTWLR LFKPIESPRITNG  
DKLPIILYFHGGGFILCSAAQTIFHDFCTSLANKLPAFILSVEYRLAPESRLPAAYND AVQAINWVRDQA  
LNLNGEPLLREFGDFSKCFIMGCSGGNIVYHAGLQALD  
LDIEPLKIRGLVLNQPFVGGTQRTKSELRLVDDKILPLSMSDMMWELALPRRVDRDHK YCNPMIHGDDDK  
KNGLIKRCFVSVRS GDPLMDHQMEFVRMLERKGVHVVRFDDNEKEGYHGI ELYEPQKAEV LFAALIDFV  
YSSEATE

>CMACXE1

MLPIIIYFHGGGFILFNADSTMNHDFCQSIATHIPALVVSVDYRLAPENRLPAAYDDA VDALNWVKDQGL  
GKLNNSEVWLKEYGDFSKCFIMGCSGANVAYHASLRAIEMDLEPAKINGLILHCPFFGSLERTESDSKV  
INNQDLPLAVRDMWELALPLGSTRDHVYCNPNIDHDGSSSGNMVGLIERCFVVG FYGDPIDRQIQLVK  
MLEEKGVK VETWIEQGGYHGVLCFDPMIRETFLEK LKHFILNDEFIY

>CMUCXE1

MDPYKFLSISPNPDGSLTRHTRIPTSPTTNNPTVASADFP LNPSNNTWFRLYKPTNTPTS AKVPIVIYFH  
EGGFVLFSAASQPFHDCCAALASQLQALVMSVEYRLAPEHRLPCAYDDAIDAI AWVRGQALGGGNGWFGD  
SVDFSRCFLMGSSSGGNIVYKAGLMSLEKGLIGGGAHV KLVGLIMNQPFVGGVERTDSELRYADDRILP  
LPAGDLLWELALPTGSDRDHEFCNPLKGVSGEIERLPRCFVNGYCRDPLIDRQRQFAKMLERN GVSVVER  
FVDDGFHACELFDPDKARALALAIKDFIYDCGAGGAKSAL

>CMUCXE2

MRNKRMAALSFDNARLGHQVGDHRQKPGVLI EEIDGLIRVYKDG HVERPPVVPNVDCIAYIESSLTCRD  
VIIDKFTNVWARFYVPRTQGTKLPFLVYFHGGGF CVGSAAWSYHEFLTKVATKAGCVIMSVNYRLSPEH  
RLPTAYEDGVGALMWRREILRGSSEQKWWW SHCNFSQVFIVGDSAGANIAHHVTTTRVGQLGASSDEPNI  
LSPMTLKG TILIQPFVGGGEARTHSEKYMAQPPKSALTVAASDVYWRLSLPLGASRDHRWCNPIAKGAMD L  
EELRVPPIMVCI SELDILKDRNLEFCSAMKRAGKRVEHV VYMGVGHAFQVLNHSQLSQARAHEMMSHIKA  
FINR

>CTRCXE1

MAGSNAVNESQRAVPLNTWILISNFKVAYNLLRRPDGT FNRHLAEFLDRKVPANVIPVEGVFSFDCFIDR  
ATGLLSRIYRPAPADEAEILPGVIDLERPLSTEVPV IIFFHGGSFAHSSANS AIYDTLCRRLVRNCKAV  
VVSVNYRRAPENRYPCAYDDGWAALKWVHSRPWLRSGEDSKVHVYLAGDSSGGNIAHHVAMRAVEAGTEV



MGNILLNPMFGGMDRTESEKRLDGRYFVTIQDRDWYWRAFLPEGTDRDHPACNPFPGPKGADLKGVKFPKS  
LVVVAGLDLVQDWQLAYVEGLEKAEQEVKLIYLERATIGFYLLPNNDHFYSVMNEINKFVNSNC

>ECACXE1

PQLLILTTFYKIIIKLYFFNLSSLSTMEDKSSSLISNINPYEALQLVYDAQADSLTCNLPVPTIESSGD  
PNCKDIPLNIEKKTWVRIFRPTTITPTTTSTVTTATTTTNKLPIIIYFHGGGFILFSAASGMFHDFCKSM  
AAQVQALVVSVEYRLAPEKRLPAAYDDATDAINWVRNQAMPVNGEPWLRDYADFSKCFMGC SAGANIS  
YHVGLKACELDLEPIKISGLILNQPFPGGSKRTESEIRLRDDQILSNPVIDLMWKL SLPIGVDQDHVYSN  
PMANNGGNNVKKIKRIFVNGCDGDFDRQVEFVKMLEDKGLKVEASMEEGGFHGMTFLDPKQTDFFCKK  
LKDFIFLSQVV

>GFLCXE1

MQSSSPQIKNTNKRKNPNPTMADQPPTTINPYEALKIVHNPDDLTRNLPIPDTPSSDDPNCKDTS LNP  
QHKTWIRIFRPTKTSQDNDFSITNKLPIIVYFHGGGFILCSAFSTIFHDFCKNMATQLPALVLSVEYRL  
APESRLPAAYDDAVDALNWRNQALETANGEEWLRDYADFSNCFIMGCSAGGNIAYHTGTRALELDLEPI  
KISGLILNQPYFGGVERTGSELRLINDKALPLAMNDMMWELGLPIGADRDFHCNPMVKIDGESGTRDEG  
KLGRLMIRCLTIAGYDDPLFDRQIELGKMLEGKGVKVVRFIDKEGYHGMVHFDQKKAEMFVAVKDFISS  
TN

>HCACXE1

MADQNSSVEPIDPYKFLNIIYNPSDDTLTRNNHFPSTPITPDVKNADISLNTTKKTWVRLFRPNEPSLN  
RKLPIIVYSHGGGFILQSASDTVFNFCASMANILPALVVSIEYRLAPESRLPGAYEDTIEAINWVKNQA  
LDMNGEQWLKDFADFSNICYLMGSSAGGNIYHAGLRALS LLDLPLIIKGFILNSPFFGGSKRTESELRLI  
NDTLLPLAVNDLMWELSLPKGCDRGHEYCNPMVDSSYKQNIIGLIEKCFVSVGGEDPLMDREMEFVKMLKE  
KGVKVVVWFDKEGLHGMEITVPGKDQALFVLLKSFVY

>HCACXE2

MANPNPVTIDPFKQLIITLNPDGTLTRPTLVPIVPPTGEINSHSKTPSVISMDVPLNPSKNTWIRVFPQS  
NLSSNSKHPLIIYFHGGGFVLYSAASKPFHESCCQMASELSAVILSIEYLLAPENKLPSAYEDAEDAMLW  
VKKQALNCEYKCFEVDVFSKCFIMGSSSGGNIYQAGFRALKLDLEPITINGVIMNQPFPGGVERTESEL  
RLINDRILPLPTCDLMWEFALPIGSRNDHEYCNPIGSHHNEIKWLP RCYVRGYGGDPLIDRQMKFVKMLE  
DHGACVVKHFLDDGFHACELFDPKMAEALYVDLRDFIYSS  
ESNAVVKSKY

>JDICXE1

MDPYDALNFILNPDGSITRLDSSVPTTPPTGYDYNSSVASIDVPLNTTTNTWIRIFHPLNLP SDTKLP I  
IVYFHGGGFLLFSAASLTLHDFCVHLAGETPALVLSVDYRLAPENRLPAAYEDAVDAVLWLKQALHGEH  
KFTTFVDFTQCFIMGSSSGGNIYHAGLRALNLSNPVEIRGLILNIPFFGGVERTESELKCVDDPILPL  
PVADLMWELALPVGTDRDHEYSNPMVEGSNQKDIQRLPTCYVNGYEMDPLVDREKQLVEKLGKGV CVVE  
HFFDDADAYHAVEFFDPDKGRALVMDLKDFIYSPVTAASV  
DKPIE

>MCACXE1

MENQQPLLNTTDPYETLKIVYNANDDTLRLYPIPCTAATGDHHLNPIITKDICLNTTHKTWLR LFIPT  
EPPSPNSLPLIIYFHGGGFVLC SAANTLFHDFCARIAADLPAVVASVEYRLAPERRLPAAYEDAVEAVN  
WVREHGIKEKWTRDFVDFSKCYLMGNSSGGNIAYRAGLRCSGLDLEPVKIVGLVLIQPYFGGVERSESEM  
RLANDGHFPLVVNDLMWELALPRGADR DHEYCNPMVAGAWEKIGKCFVSVRGGDPVMDRQIALARRLEG  
EGVKVESWFEEEGYHGIELFDPVKASELLLKLFICPPEAAEYRVVEK

>MCACXE2

MDDPYKFLNIVPNPDGSLTRLTQIPTSPSSHPEATS NKSINSSLNDHSVISMDFSLNPATNTWLRLFRP  
NTTTPQHVKLP IIIYFHGGGFVLFSAASQPFHDS CAAMAADLPALVLSVEYRLAPEHRLPAAFHDAVDAI  
VWVKQKALEQHWLCDLADFSKCFMGCSSSGGNIYHAGLRALGLDLGPVKVSGLILNQPFPGGVV RTESE  
LRLAGDRILPLPAGDLMWELALPVGSDRDHEYCNPIMKDSNGGDIERLPRCFVNGYGGDPLVD RQKEFVK  
MLEQCGVSEVARFVDDGYHAVELFDQSKAKDLVMAIRAFI  
YTTSATTTPKSTL

>MCACXE3

SDLRDPVIDEPYQFLKIALNPDGSLTRGYEFPRVPPTPELASESANLSSRRQPALSKDIPLNTSNQTF  
RLFRPLHHSKLPPIIDFHGGGFVILSAISAPFHDMLSRAAAFAPALIITVEYRLAPEHRLPAAYDDAME  
AIMWVRDQAREINGCDPMMKELADYSNVHIMGTSAGGNI  
AYQAGLRALDVDINPVQIRGLILNQPFPGGIQRTQSEIILSRNPYLPMAVSDLLWVLSLPPGSDRDHEYS  
NPLDGVNQKIQLPRCLIRGFAGDALVDRIKGLAKMLDAHGVKVVVKIEDGGFHGAEMADPSKVQELFLO  
IKDFVYSS

>NDOCXE1

PIQQTLSNSGELKLPLVLYFRGGGFILCSVANTFFHNFCTSLATNLPALILSVEYRLAPESRLPAAYDDV  
IEAINWVRNQGLDMHGGEWLRKYGDFSKFFLMGCSSGGNMAYHAGMHALGLDIKPLKIQGLILNQPFPG  
GTKRTESELRLVNDQKIPLAVSDLMWELALPKGVD RDHK  
YSNPMVHDDDDQEKIELMKGCSWFVSMRGGDPLMDRQMEFVRMLEKKDKVVKVWFDDDEGYHGMELFEPQ  
KAEELLVALKNFIRSEALE

>NDOCXE2

MDPFKVLNLI PNPDGSFTRPPIFPYAPPTGYTDSTPPQNVATIDVPLNSMKNTWIRIFHPLNLP SVSTKL  
PVILYFPGSGFVMDTARILPLNEFCIQIAGELPVVILSVQYRLAPENRLPSAYEDAVDAMLWLKQALHG  
EHKFIDSADFTKCYIMGSSSGGNMAYQAGLRALNLDLEPVRINGLIMNQPFPGGVERTGSEMKYENDKVL  
PLLATDSMWELSLPIGADR DHEYCS PMVQVWDLVQIQKLPKCYVNGHGGDLLVDRQKEFVKMLEGQGVSV  
IAHFFDDGCHAVELFDQEKAQALYMDLKEFIYSSTTGDA  
HGS

>NSACXE1

MADENPNSVALDPYKVINIVLNP DGS LTRPTQVNLPTSDDPKSVISLDIPLNPSNKTWMRVFQPPNLSS  
NQKLPLIIYFHGGGFILYSPSSRPFHVSCIQMATQLPAIILSVDYRLAPENKLPSAYDDAVDALLWVKNN  
AMKGEYKWF EFIDLSKCFIMGSSSGANITYHVGLKALVLDLEPVKIKGLIMNQPFPGGIQRTGSELRFVN  
DKVVPLVVADLMWEFCLPVGADR DHQYCNPMAEGGSEEEEEIKELPRCYVRGHDGDPLIDRQKEFVEMLEG  
RGVSVVKDFSDDG FHACELFDATKGQELIEKVKEFIYSSS

>NSACXE2

MADENPNSVALDPYKVINIVLNP DGS LTRPTQVNLPTSDDPKSVISLDIPLNPSNKTWMRVFQPPNLSS  
NQKLPLIIYFHGGGFILYSPSSRPFHVSCIQMATQLPAIILSVDYRLAPENKLPSAYDDAVDALLWVKNN  
AMKGEYKWF EFIDLSKCFIMGSSSGANITYHVGLKALVLDLEPVKIKGLIMNQPFPGGIQRTGSELRFVN  
DKVVPLVVADLMWEFCLPVGADR DHQYCNPMKGSQNQEIKRLPRCFVRGYGGDPLIDRQKEFVKMLEEEG  
ASVIKYFLEDGFHACELFFPDKAQALYVDLKD FFIYSSPET  
NKSTL

>NSACXE3

MAAQNQNSTINPFEALSIVLNANGSLTRHPHPLSTLSLNTTKSVVCTDIPLNPNRNTSIRIFQPPIHPTT  
PKIPLIIYFHGGGFILFSAKSPPYSEFCLQIASELPALVLSVGYSLAPEDRLPSAYEDALDAVVWKNHA  
FKGEYKYDFFDYVDFSKCFIMGSSSGNITYQLGLQALKLNLEPFRINGLIMI QPFFGKVERSGSELRLA  
NDNILPLPVTDLMWELSLPVGADR DHQYCNPMAEGGSEEEEEIKELPRCYVRGHDGDPLIDRQKEFVEMLE  
GRGVS VKDFSDDG FHACELFDATKGQELIEKVKEFIYSS  
S

>NSACXE4

MAAQNQNSTINPFEALSIVLNANGSLTRHPHPLSTLSLNTTKSVVCTDIPLNPNRNTSIRIFQPPIHPTT  
PKIPLIIYFHGGGFILFSAKSPPYSEFCLQIASELPALVLSVGYSLAPEDRLPSAYEDALDAVVWKNHA  
FKGEYKYDFFDYVDFSKCFIMGSSSGNITYQLGLQALKLNLEPFRINGLIMI QPFFGKVERSGSELRLA  
NDNILPLPVTDLMWELSLPVGADR DHQYCNPMKGSQNQEIKRLPRCFVRGYGGDPLIDRQKEFVKMLEEE  
GASVIKYFLEDGFHACELFFPDKAQALYVDLKD FFIYSSPE  
TNKSTL

>NSACXE5

MDTFKQLSITYNPDDDTIDRLVTIPCTTTNHNSLPNQIFTHDIPLNSSHKTSLRLYKPINPLHAKLP  
LVVFIHGGGF LASFNTIYNDFCTSM AISLGVVLSVGYRLAPESRLPAAYEDALEALTWVRDQADNIL  
LKDMVDFSNCYLMGDSAGGNI VYHAGLRALSINLEPLVIKGYIFIQPFPGGMKRTESEVRLADDKILSSV

VSDLLWELGLPKGSDRDHEYCNPMVGGGFSDKIELLTRCFLVALGGDLLVDRQKEFMKMLEEKGVVSW  
FEDEGCHGMFLFEPEKALHLFEVIKDFIYQPMPTV

>PBRCE1

MADQHSSTTSSTIDPYEALMVVHDPDLDTLTRNLPLQITNTTDDPNKSDILLNAQHNTWIRIFKPTIQDL  
PTANKLPVIIYHGGGFILCSTFWTIYHDYCKSKANALPAIVLSVEYRLAPESRLPAAYDDAVDALNWVK  
HQASGGKPEPWLRYADFTNCYIMGESAGGNIAYNVSLRASELDLSPLKISGVILNQPFLLGGIERTSSE  
LRLINDKILSLPVSDLMWELSLPIGSRNH  
PYCNLLINEDDESLRKKCGFIKKCLVIGCDGDPIDRQVEFVKMLEGKGVKVFETFMQEGGYHGMVYFEPE  
ELEIMLPRVKDFILSGASKL

>PBRCE2

MADQHSIDPYEALMVVHDPDLDTLTRNLPLQITNTTDDPNKSDILLNAQHNTWIRIFKPTIQDLPTANKL  
PVIIYHGGGFILCSTFWTIYHDYCKSKANALPAIVLSVEYRLAPESRLPAAYDDAVDALNWVKHQASGG  
KPEPWLRYADFTNCYIMGESAGGNIAYNVSLRASELDLGPVNITGVILNQPFLLGGIERTSSELRLIND  
KILSLPVSDLMWELSLPIGSRNHYPYCNLLINEDDESLRKKCGFIKKCLVIGCDGDPIDRQVEFVKMLE  
GKGVKVFETFMQEGGYHGMVYFEPEELEIMLPRVKDFILSGASKL

>PBRCE3

MIVYFHGGGFILCNANSTIFHNFCKSMANQLSAIVLSVEYRLAPENRLPAAYEDAVESLVVWQNALDAI  
NGEPWLRNYGDFSKCFIMGCSAGGNIAYNSCLGASELDLEPIKICGLILNQPYFGGVERSSELRLVNDK  
CLPSVNDLMWELGLPVGVNRDHVYCNPFVDENLETKLRFIRRCVTCVSNEDPLVDRDIQFVKMLEGKGV  
KVVSWIEEFGFHGMASDPVKAQELLKVVKDFIFSED

>PSOCXE1

MADPYEFLMCIHNPEEDTLTRNFPIPATPLDQNTKDISLNPDRKTSLRIFRPPTKEPPVTNKLPIIIY  
FHGGGFILFNADSTMNHFDCQSIATHIPALVVSVDYRLAPENRLPAAYDDAVDALNWVKDQGLGKLNSE  
VWLKEYGDFSKCFIMGCSGANVAYHASLRAIEMDLEPAKINGLILHCPFFGSLERTESDSKVINNQDLP  
LAVRDVMWELALPLGSTRDHVYCNPNIDHDGSSSGNMVGLIERCFVVGfyGDPLIDRQIQLVKMLEEKGV  
KVETWIEQGGYHGVLCFDPMIRETFLEKLFILNDEFIY

>PSOCXE2

MADPYEFLMCIHDPEEDTLTRNFPIPATPLDQNTKDISLNLDRKTSLRIFRPPTTEFCVTTNKLPIIIY  
FHGGGFVLFNADSTINHFDCQSIATHIPALVVSVDYRLAPENRLPAAYDDAVDALNWVKDQGLGKLNSE  
VWLKEYGDFSKCFIMGCSGGNIAYHASLRAIEMDLEPVIINGLILHSPFFGSLQRTESDLKVINNQDLP  
LAVRDVMWELALPLGSSRDHVYCNPNIANHGSSSGNMAGLIKRCVIGFYGDPLIDRQIQLVKMLEEKGV  
KVETWIEQEGYHGVPCFDPKIRETLLGKIKYFI

>SCACXE1

DHHQLSQAASVNYSIDPYDRLKIVHNSDDDSLIRLVPLPSYPSTDDDDQNSCKDILLNPQHKTSLRIFR  
PTTTQFQQSSKKYDFSVKNLPPIIYFHGGGFILGSAFNIVFHDYCKSMATQLPALVLSVEYRLAPENRL  
PAAYDDAMDAVNWVRNQALDAINGEPWLRYADFSKCFIMGFSAGGNIAYHAGLRALELDLEPIKISGLI  
LNQPYFGGSKRTRSELRLTNDPILPCPMSDLMWELALPRGANRDHMYCNPMVDDVTRRGNRNKVGLVIRR  
CLMAGCDGDPIDRQIEFVKMLEGKGVKVFETWMEEGSHGMVFADPKAEILFGKLKDFIFTDIVTKGAA  
N

>SCACXE2

SIDVPLNTDKNTWIRIFLPSNLPSNNSKLPPIIIYFHGGGFIVFSSASLPYHEFCVRLASELPAVILSVEY  
RLAPESRLPSAYEDAIDAINWLKKQALNGGEHKFVDFVEFTGCFIMGSSSGNIAYQAGLRVADLDIEPV  
KINGLILNQPFLLGGVERTGSELRYANDEILPLPVSDLMWELALPIGANRNHEYCNPMVEKSHYCKIRMLP  
RCLINGNRDPLVDHQKEFVKMLERNVGVVAHFADDGSHAVELFDPEMARALVTNVRKFIYSSATDVGV  
STTGAAKSSIPIDRLLFCK

>SDICXE1

ESLPPINPPSYKPLTMADQSSTTINPYEALNIVHNPDDTLTRNLPIPDTSSDDPNCKDIPLNPQHTWI  
RIFRPTKTQFQDDQNKIPVIIYFHGGGFIIICSPSSTIFHDFCKSMAIQSSALVISVEYRLAPESRLPAA  
YDSDVDALNWVRDQALDVINSEEWLREYGDVSNCFIMGESAGGNIAYHACLRSLELDLEPIKITGLILNQ  
PFFGGVERTGSELRLINDKVISIVMSDLFWELGLPIGADRDFHYSNPMVENNGGTSTINWLMIKRCLVI

GKMLERKGVKVVSWIEEEGCHGKVHSDQKHAEEMFKVVKDFIRA

>TCOCXE1

MEDHDDVPSINPTDFFKSLKIIYNPETDTLTRLFTVPCTNPTNTDDDDHHHSPAVSSQPVLTKDLPLNSSY  
HTWLRLFLPTGPPPSKKLPLIIYFHGGGFIFMSAANTMFHDFCSRVAVELPAVVL SVEYRLAPESRLPAA  
YDDAVDAIHWVREQALVAGDDKGDLEDVWLREQVDFPTCYLMGLSAGGNIAYHASLRSLHLDLPLKIV  
GIILIQPYFGGVQRTASEMRLGNDENFTVGMTDVMWELSLPKAADRDHEYCNPMVGDYGEKIGQLGRFLV  
CVRGGDMLRDRQMELVKMIEEKGGKVKCFEEEEGYHGVELSDCEKASELLVKIKHFIYEK

>TCOCXE2

MEDHDDVPSINPTDFFKSLKIIYNPETDTLTRLFTVPCTNPTNTDDDDHHHSPAVSSQPVLTKDLPLNSSY  
HTWLRLFLPTGPPPSKKLPLIIYFHGGGFVFLSAANTMFHDFCSRVAVELPAVVISVDYRLAPESRLPAA  
YDDAIDAIYWVREQALVVGDDKAHDLKNVWLREYVDFSTCYLMGLSAGGNIAYHASLRCLPLDLEPVKIV  
GMVLIQPFVSGVQVRSSEMRLGNDGMFTLDMSDAMWEYALPKGADRDRHEYCNPMVGDYGEKIGQLGRFLV  
CVRGGDMLRDRQMELVKMIEEKGGKVKCFEEEEGYHGVELSDCEKASELLVKIKHFIYEK

>TCOCXE3

MSDQVAPFTPVPITDPYDYVDLVHHHDGTITRKKPSNFPTVPTVPLDLSYPAPVLSKDIPINQSNNTWARV  
YISRYKLESNSTDLLPLIVYYPGGGFVISTTATPTCYNFC SKLALQLSAVVV SIDYRVGPEHLLPAAYD  
DAVEALNWIKFAEDSWLRDHANL SNCFIMGCSAGGNIAYHVGLRVAMEDVDSFKPLKINGLILHYPFFGG  
HERTESELRMANDLILPLIATDVMWKYSLPAGANRDHEYSNPAVVDRSKLFDKIKMLGWKILMSTGDKDP  
GIDRQIGLLTTMKEKGVKVKGRIVEGDHHEEELNNSHKLDSLLVALKDFIFSTFSE

>TFLCXE1

MAVPLNTWVLISNFKLAYTMLRRPDGT FNRHLAEFLDRKVP SNANPVDGVFSFDVIIDRATDLLCRVYRQ  
ALATEGRPSFLQLEQPLSSDVVPV IIFHGGSF AHSSANS AIYDTLCRRLVRNSKAVVSVNYRRAPEY  
RYP CAYDDGQAALKWVHSRPWLRSGKDSKAHVYLAGDSSGGNIAHVALRAVESGTEVLGNILLNPMFGG  
VERTESEKLDGKYFVTLQDRDWYWR AFLPQGADRTHPACNPF GPNAASLEGVKFPKSLVVVAGDLLHD  
WQLAYVQGLQRAGQDVKLMFLEQATIGFYLLPNNIHFFSLMDEINNFLSC

>XSICXE1

MAEQNPSILPINPYEVLGIVHNPDDTLTRQIQIPCTTTSTDDISCAKITKDIPLNACNKTWLRRLFRPIEQ  
PVNVKLP IILYFRGGGFILCSASNTIFHNFCASMAN KFPALIVSVDYRLAPESRLPSAYEDAIEAITWVK  
KQALDTNGEQWFKDLADFSKCYLMGCSSGGNIVYHVGLRAISLDLKPLL IKGLILNQPF FGGLRRTSEM  
RMVNDKTLPLVSDLMWELALPAGSDRDHEYCNPRVDGGFKENIKLLSRCFVSVRGGDPLMDHQKEFVKM  
VEEEGVKVVNWFDEAGYHGMELFEPQKA EAMFVALKAFIYSSSDIE

>XSICXE2

MASQADQAHVDRYKEHNIIYNPDDTLTRLITFPCTSTTDHNSL PNQPVFTQDIPLNPINKTWMRLFKPSN  
PQPPKTKLPLILYFHGGGF IIGSASNSTFHDFCTSM AIELSCVVL SLGYRLAPESRLPAAYEDAMEAIDW  
VRNKALDLGSDNCLKEVDFSKCYLMGISSGGNMVYHAGLRVLSMDLHPMI IKGLILNHPFFGG LKRTNS  
ELRLANDKFSLAFTDIMWELSLPKVFDRDHEYCNPMVEGSNKDKIGLLGRCFVSGCGGDILIDRQMEFAK  
MLEEKGASVVTWFEEEGCHGVELFEPEKTRALFFLLKEFISGQ

>XSICXE3

MADQNTIIDPYKHINVVLNPDGTLTRPTLVPIIPPSSDPNSNSVISLDIPLNPSKSTWMRVFQPPNLSCN  
QKLPLIIYFHGGGFVLYSASSRPFHESCVKMASELPAIIISVDYSLAPENKLPSAYEDGMEALLWVNNQA  
INGEFEFCKFVDFSKCFIMGSSSGANITYQVGLRALKLDLEPVKIIIGLIMNQPF FGGIQR TGSELRMVND  
RIIPLVVADLMWELALPIGADKDHEYCNPMAAHFNEIKQLPRCFVNGYGGDPLVDRQKEFAKMLGEHGAC  
LVEHYSDDGFHACELFIPDKA QALVMNIRDFIYSPGIGSNAATSTL

CYP80

>HSACYP1B1

MGTSLSPNDPWPLNPLSIQQTLLLLLSVLATVHVGQRLLRQRRRQLRSAPPGPFAWPLIGNAAAVGQAA  
HLSFARLARRYGDVFQIRLGSCPIVVLNGERAIHQALVQOGSAFADRP AFASFRRVSGGRSMAFGHYSEH  
WKVQRRAAHSMMRNFFTRQPRSRQVLEGHVLSEARELVALLVRGSADGAFLDPRPLTVVAVANVMSAVCF

GCRYSHDDPEFRELLSHNEEFGRVTGAGSLVDVMPWLQYFPNPVRTVFRFEQNLNRNFSNFILDKFLRHC  
ESLRPGAAPRDMMDAFILSAEKKAAGDSHGGGARLDLENVPATITDIFGASQDTLSTALQWLLLLFTRYP  
DVQTRVQAELDQVVGRDRLPCMGDQPNLPYVLAFLYEAMRFSFVPTIPHATTANTSVLGYHIPKDTVV  
FVNQWSVNHDPKWPENFDPARFLDKDGLINKDLTSRVMIFSVGKRRCIGEELSKMQLFLFISILAHQ  
CDFRANPNPAKMNFSGLTIKPKSFKVNVTLRESMELLD SAVQNLQAKETCQ

>AMECYP80-1

MDILSISVIAIVITSLLYLILRDSSPKDLPPGPKPWPIVGNLLQLGEKPHSQFAQLAKTYGDLFTLRLGT  
ETVVVASTPLAANEILKTHDRILSGRYVFSFRVKHHVENSIVWSECNDTWKNLRKICRTELFTQMIEN  
QAEVRERKTWEMIEFLKKKEGEEVKIVEIIFGTLVNI FGNLIFSKNIFELGDENSGSVEMKKHLWRMLEL  
GNSTNPADYFPFLGRFDLFGQRKDVADCLQGIYDVWGVILKERKVEKKRIDEEEKKKNDFVDILLDSGL  
DDQQINSLLMELFGAGTETSASTLEWGIAELTKNPKIKTKIRSELMTVVGQNTVKESDIPNLPYLQAFVK  
ETLRLHPPPTPLLLPRRALDTCRVLNYTIPKECQIMVNAWGIGRDPKTWNPDLTFSPERFMNSNIDFKGND  
FELIPFGGRRICPGVPLATQFISLIIATLVQNL DWELPMGMDPSDLIMEEKFGTLQKEPPLFIVPKFR  
V

>BTHCYP80-1

MSKNSPPFLDYMSNIAQKYGPLVHLKFGHLSSIFASTKEAAMEVLQTNDAKALSGRKLPCFRIKPHIDYS  
IVWSDSNSYWKNGRKILHTEIFSQMLQAQEKNRERVAENLVNFIMTKVGNVVELRSWLFGCALNVLGHV  
VFSKDVFEYSQSDDEVGMDKLIHGMIMTGGDFDVASYFPFLARFDIHGLKRKMDEQFKLLIKVWEGEVLA  
RRANRNPEPKDMLDVLIANDFNEHQINAMFLETFGPGSDTSSAIEWALAQLIKNPKLAKLREELDRVV  
GRSSTVKESHFSELPYLQACVKETLRLYPSVTIMIPHQCMETCQVMGYTIPKGMVDVHNAHAIGRDPKDW  
KDPLKFQPERFLGSDIEYNGKQFQFIPFGSGRRICPGLPLAVRTIPLVLA SLVHAFDWELPDGVPNEKLD  
MEELFTLTLCMAKPLQVIPKVI

>BTHCYP80-2

MGPLALFALVFIIPFLLLITL FKPSSKNLPPGPPAWPLIGTLLPKLKKQPHVELTKLAKSHGPLMLLKFG  
VEPVVVASNHVAAMEVLKTHDREL SGRFAPHSVRIKGYVEHSMVWADCTDYWKLVRKIWR TDMFSTKMLD  
AQACVREEKVL ELVGLFKGKQGEVVKFADV VFGCILNILGAI VFSQNVYDFEDKSDNELGMKGMIRQLMI  
LAAIPNLADLYPILGKSDFQGLK KASAACVTRMNESWATVVKERRRNSDHLKNDFLNVL IKAGFSDPQID  
AMLLEIFGPGSDTSASTIEWAMAELLKSPEKLKNVQNELKKVIGANQVVKESDLPDLPYLNACVKETLRL  
HPPVTFLPHRALEECQVMGYTVPKGSQLMVNTYAIGRDPETWNNPLSFEPERFLSDTEIDYQSSTDMKY  
IPFGAGRRICPGLSLAARLVPLVLA SLIHAFDWGLPGGMDPSEIDMKDKFGLALLKDDPLLII PKVTKV

>BTHCYP80-3

MDLNTALLYLIPVVLVYYYILFKPKHKNLPPGPKPWPLIGNIPVLFSGGKPLHVTLTDMARTHGPIITLWM  
GTQPTAIASTAESAMEILKTHDR LFSGRAVRMSFRLKHHIKYSLVWADCSEYWKLLRKIVRTEIFSPKML  
QVQEHVREKKMEEMVEFLK GKEGEVLKLSPLVFGTLLNVLGNVVYSKDVFGYFGDDGDQMQLMKEMLM I  
GAAPNVAEFWPILEELDLQGLKKKCHERFTEVMKMWKGTVEERKVN RNAEPKDMLDVLLANDFNDDQINA  
LFLETFGPGSETSSATIEWTMAELIKNPKIIAKVREELDQVVGKSLVKESHLPNLPYLQACIKETMRLHP  
AAPFLLPHRSVEACQVMGYTIPKDIQVLVNA YAIGRDPKTWKDPTTFKPERFMESDIDYYGKHF EFIPFG  
SGRRQCVGMPLATR TIPLIVSNLVHAIDWSLPDGKNLEELVMNETLSLSLALDPTLTVIPKARV

>BTHCYP80-4

MEEVLGESNLFFLLLLALLPFFFFILNYIKSPTLPPGPF SWPIIGNLLKMGTKPHVSLAQLAHTYGPIIS  
LRLGTRLLVIGSSPSAAIEILKTHDRLLSARTIPDASPTK DPAHTKFSLAWADCTDQWKYLR TICRSELF  
SIKAIESQSKMREEKVIELVKFLGTKDGLVRIDEVVFDTMVNMLSNI FVSQDFVNMEERDSEGLRGLV  
RKFVEVAATPNIA DFYPILSVLDLHGLKKRSKELFVKICDLWGVMIKERREGKTGNKDFLDFLLANGFIN  
DQINCLLLELFSAGSDTSTSTIEWAMAELMKNEEAMKNVLS ELEREIHTNMVKESDLPQLPYLHACVKET  
LRLHPPAPLLLPHRALETCKVMNYTIPKDTQVLVNVWAI GRDPMVWNPDLAFKPERFLDSNSLDMNLSDF  
RFIPFGAGRRICPGLPMATKQVALILASL INCFHWSLPHDMHPLELDMEEKFGVTLQKEQPLVLI PRVKT

>CCHCYP80-1

MEILSIAILSVVISTLIYYFFFSDSKAQKGLPPGPKPWPIVGNLLQLGDKPHSQFAEMAQIYGDLFTLKM  
GTETVVVASTPAAAIEILKTHDRLLSARYVFSFRVPHVENS MVWSDCNEVWKM LRKVCRTELFTPKMI  
EAQAHVRESKALEMVKFLK GKQGGVEKIAEVVFGTLVNI FGNLIFSQDV FELGDPSGGS AEMKEHLWRML

ELGNSTNPADYFPILGRFDLFGQRKDVAECLRLIYDVWGVMLKERKVKKAAQGNKGNDNKDFVDVLLDSG  
LNDFQINALLMEIFGAGTETSSSTIEWSITELTKNPHITAKLRAELESVVGQNPVKESDIPNLPYLQACT  
KETLRLHPPTPLLLPRRAIETCKVMNYTIPKDCQIMVNAWAIGRDPKIWKDALSFSPERFLNSSVDFKGN  
DFELIPFGARRICPGVPLATQFISLIVATLVQNFENL PNGMDPKDLVMDEKFGLTLQKEPPLYIVPKS  
RV

>CCHCYP80-2

EFFSITILSLLITSLIYYLFS DHSKTQKGLPPGPKPWPIVGNLLQLGDKPHSQFYEMAKTYGDLFTLKM  
TQTVVASTPAAATEILKTHDRLLSARYVFQSFRIPKHVENSVMWSDCTDAWNMLRKICRTEIFTTKMI  
AQAYVRESKVLKEMVKFIKKGQSEVKVLKVVFETLVNVFGNLI FSQDVFQMGDPSSGEGAVMKGHIWRMLE  
LGNSTNPADYFPILGRFDLFGHRKDVEECLRQIYDVWGVMLKERKAKKAAIQEKGGNYNSDFVDVLLDS  
GLEDFQMNILLMELFGSGTETSSSTIEWAMAELTKSPDIAAKLREELSSVVGQRPVKEADIPNLPYLQAI  
TKETLRLHPSTPLCIPRRAPETCQVMNHTIPKDCQIIVNVAWAIGRDPKAWEDACKFSPERFLNSSIDFKG  
NDFELIPFSAGRRICPGMPIAIQFVNLVAVATLVQNFWDLPNGMDPRDLVMDDKFGLTLQKEPPLYIVPK  
SRV

>CMACYP80-1

MEIITVALIAVVISSILYLIFRDTSPKGLPPGPKPWPIVGNLLQLSDKPHAQFAELAQTYGDLFTLRMGT  
QTVVASTPAAAEILKTHDRILSGRYVFQSFVKEHVNSIVWSECNDTWKSLRKVCRTTELFTQKVI  
QAEIRERKAWEMVEYLKKGQEEVKIVEVIFGTLVNI FGNLIFSQNI FDLGDPSSGSVELKEHLWRMLEL  
GNSTNPADYFPIMGRFDLFGQRKEVEDCLQGIYDVWGAMLLKRRKAAKEAGNSEGGNDFVEILLDSGLTDQ  
QINLLMELFGAGTETTASTLEWAITELTKNPNVTAKMRSELETVVGHN TVKESDIPNLPYLQAFVKESL  
RLHPPTPLLLPRRALETCRVLNYTIPKECQIMVNAWAIGRDPKIWDPLTFSPERFLNSSIDFKGDFEL  
IPFGGRRICPGIPLATQFIGLIAATLVQNFWDLPNGMSPKELNMEEKFGLTLQKEPPLYIIPKSRA

>CMUCYP80-1

MEVVAATIGLIAFAIFIYIFFIKDQSSKGLPPGPKPLPIVGNLLQLGDQPHAQFAQLAQTYGDLFSLKL  
GSQTVVASTPAAATQVLKTHDRIFSGRYVFQSFVKEHVNSIVWSECNENWKMLRKVCRTELFSAKMI  
ESQAHLEAKAMELVKFLKREGQVVKITEVVFVGLVNI FGNLIFSQDVF DLSDPTGGS AEMKDHIWQML  
EMGNSANPADYFPFLGRFDLFGQRRVANCLQQIYDVWGAMLRERRRAAKKGDGSTPPHDFVSI LL DAG  
LDDQKINALLMELFGAGTETSSSTIEWAIAELTKNPSIKEKLLLELDNVVGKEEVKESDIPRLPYLQAFV  
KETLRLHPATPMLLPRRALETCQVMGYTIPKDCQIMVNAWAIAIARDPKIWKELRFLPERFLDSSLD FKGN  
DFEFIPFGGRRICPGIPLATQFIGIIVATLVQNLWDSL PNGMDPSELVMEEFGLTLQKEPPLLI VPKA  
KDLC

>CMUCYP80-2

MEVVTLLSLLSSIPLILLVYLLLLLKPKNLPPSPSWPLIGSIPAILGSSKPLHLTLTDLAAAHGALM  
LVTLGTAPTVA STRAAAMEVLKTHDKSLSGRHIRMSFRIKEMNRHSLVWSNCTDTWKLRLRLARTEIFS  
PKMLQAQEPVRRERKVGELVHFLREREGAVVKISEFVFGTLLNIIGNVVF SKDVFYGDKNEIGMQSLIKE  
LLVIGASPNVAEFYPILEVLDLQGLRRRCADRVARVNMLWESTVKKRRISRGGDPEDMLDVL LDNGFNDV  
QINVL FLEMFGPGETSSATIEWALAEIKNPKLAKVREELDRVVGPTSQVNEAHIHPLPYLQACIKET  
MRLHPAAPFLLPHRAVETCQVMGYTIPKDYQLLVNAYAIARDPESWNEPSKFMPE RFLSEVDYNGNHFE  
FIPFGGRRICIGMPLATRTVPLIVSSLMHNFWSL PDGRRNEELEMNEMLSLSLAIDPSLTIIPKARIL  
HA

>CMUCYP80-3

MDQLTLLSLLIILLSTLLICLLFSFEFKRYISKRLPPGPFVWPMIGTVFMSVSEAQDHIVLADLARKYGPLM  
MVKFGLAPPLMVASNHAAAAEILKTHDVACCGRDPHSHVSKLPGYIEHSMVWGDCTEHWKMVRKIWRTELF  
SAKMVDSQAGIREEKVRELVGFLRGRGGEVVQLTEAIFGCIINVLGSIIFNKNVYDYEGRVDNEKGMKGM  
IRELIMLAATPNLPDFFPVFGLLDLQIGKRTGECVKRMNEYWGVIVKERRASKDHSRNDFLDVL IQAGF  
TDAQIDALLEIFGPGSDSTSC TIEWAMSELIKNPNKLLKLQEELNTVIGQREVKESDLENLPYLHACI  
KETLRLHPVTFLLPHRATKTCEVMSYTI PKESGIFVNTYAIHRDPTVWEDSSMFKPERFLNSTVDYQGN  
DFQYIPFGARRMCPAHNMASRTRIMLASLIHNFESL PNGMAPSELDMQDTFVMVLAKAVPLSVIARE  
RSVCVSS

>CTRCYP80-1

VSATIGFIFFIIFIFFFLKKQNTSTKGLPPGPKPWPIVGNLLQLGDKPHAQFAQLSQT YGDLFSLKLG SQ  
TVVVASSPTAATQVLKTHDRILSGRYVFQSFRIEKHVNSIVWSECNDNWKMLRKVCRT E VFSTKMIESQ  
AHLREAKAIEMVEFLKGRREGQVVKIAEVVFGTLVNI FGNLIFSQDVFDLADPTSGSADMKDHIWKMLEMG  
NSANPADYFPFMGKFDLFGORRAVAECLQQIYDVWGAMLKERRGAARGGTGANND FVSVLLEAGLDDQRI  
NALLMELFAAGTETSSTIEWAI AELTKNPPIREKIYRELESVVGKERVKESDIPRLPYLQGFVKETLRL  
HPATPMLLPRRALET CQVMGYTIPQDCQIMVNAWAIARDPKVWKDPLKFSPERFLNSSLDYKGNDFEFIP  
FGGRRICPGLPLASQVHKASLWQLLC

>CTRCYP80-2

LSLLSFIPFVIVLYLLFKPKHNLPPSPRPSWPLIGNIPAILGSKTPLHVTLTDLAQVHGPLMVVTLGTAP  
TVVASTREAAMEVLKTHDRALSGRHIRMSFRIKEMNKHSLVWSNCTDTWKLRLKLARTEIFSPRMLQIQE  
PVRENKVGELVEFLRGREGKVVKISQFVFGTLLNIIGNVVFSKDVFLFDDDKIGMQSLIKELLMIGASPN  
LAEFYPILEVLDLQGLRRRCADRVS KVNKLWESTVKERRLGRSGDAKMDLVLLDNGFSDVQINVLFLET  
FGPGETSSATIEWMAELIKNPDKLAKLRELDQVVGPTSQVKEAHIPLLPYLQACVKETMRLHPAAPF  
LLPHRAVETCQVMGYTIPQDYQVLVNAYAIGRDPESWKDPSEFRPERFLESNDYNGNHFEFIPFGSGRR  
ICIGMPLATRTVPLIVSSLVHNFYWSLPD GKSPEELEMNEILSLSLAIDPSLSINPKVRALNT

>ECACYP80-1

MEVVTVALIAVISSILYLLFGGSGHKNLPPGPKPWPIVGNLLQLGEKPHAQFAELAQTYGDI FT LKMGT  
ETVVVASTSSAASEILKTHDRILSARYVFQSF RVKGVHENSIVWSDCTETWKNLRKVCRT E LFTQKMIES  
QAHVREKKCEEMVEYLMKKQGEVVKIVEVIFGTLVNI FGNLIFSQNI FELGDPNSGSSEFKEYLWRMLEL  
GNSTNPADYFPILGRFDLFGORKEVAECLKGIYAIWGAMLQERKLAKKVDGYQSKNDFVDVCLD SGLNDY  
QINALLMELFGAGTETSASTIEWAMTELTKNPKITAKIRSEIQTVVGERSVKESDFPNLPYLEATVKETL  
RLHPPTPLLLPRRALETCTILNYTIPKDCQIMVNAWGIGRDPKTWTDPLTFSPERFLNSSVD FRGNDFSL  
IPFGAGRRICPGLPIANQFIALLVATFVQNL DWCLPNGMSVDHLIVEEKFGLTLQKEPPLFIVPKSRV

>GFLCYP80-1

MEIVTIAVIAVVISSIFYFIFRDTSPKGLPPGPKPWPIVGNLLQLGEKPHAQFAELAQTYGDLFTLRMGT  
QTVVVASSPSAAA EILKTHDRILSGRYVFQSF RVKEHVENSIVWSECNDTWKNLRKVCRT E LFTQKMIES  
QAHIRERKAWEMVEFLKKNEGQVKIVEVFGTLVNI FGNLIFSQNI FELGDPSSGSVELKDHLWRMLEL  
GNSTNPADYFPIMGRFDLFGORKEVADCLQGIYDVWGAMLKERKAARKAGGNQ GKND FVEVLLD SGLNDQ  
QINALLMELFGAGTETSASTIEWAITELTKNPKVTAKIQSELLTVVGRSSIKESDIPNLPYLQAFVKETL  
RLHPPTPLLLPRRALDTCRVLNYTIPKECQIMVNAWAI GRDPKTWTDPLSFSPERFLNSSIDFKGNDFEL  
IPFGAGRRICPGVPLATQF IGLIVATLVQNF EWGLPNGMKPGDLNMEEKFGLTLQKEPPLYIIPQSRA

>HCACYP80-1

MELLSIAIAFLFFFRLRIIFHDSNRKNLPPGPRPWPIIGNLLQLGEKPHAFAKLAQTYGDLFTLKLGSQ  
TVIVASSPASATEILKTHDRILSSRYIFQSF RVKDHVENSIVWSECNDNWKMLRKVCRT E LFSPKMIESQ  
AHVREAKALDMVKFLKRKEGEVVKMVEIVFGTLVNI FGNLIFSQNI FELGDPSSGSVELKDHLWRMLEL  
NSTNPADYFPIMGKFDLFGORKAVAQVLQQIYDVWGVM LKERRNRKGSENN HDFVNVLLDAGLDDQKINA  
LLMEIFGAGTETSASTIEWAIAELTKNPRVLSKIASELVNVVGEETVKESHLPNLPYLQAFVKETLRLHP  
PTPLLLPRRASDTCQVMNYTIPKDCQIMVNAWAI GRDPKTWTDPLTFKPERFLNSNDYKGNDFELIPFG  
AGRRIICPGLPLASQFINLIVATLVQNF EWGLPQGMSPSEL TMEEFGLTLQKEPPILLVLKARVSIKS

>HCACYP80-2

MDLTIALFSFIP IILVFVLLLKPKTKNLPPGPSAWPLIGNLPTLFSNPVPLHVTLTNLAKTHGPVMLLW  
LGTQPTVIASTDEAAMEILKTHDRVFSGRHVRMSFRLKHHIKYSLVWSDCTDYWKLLRKIARTEIFSVKM  
LQVQSHVREQVAELVEFLRSKQGQAVKISQFVFGTLLNILGNVVF SKDVFIYSDEEDKEGIQPLIREML  
MIGAAPNVAEFYPILEELD LQGLKRRRCADRFIQVMKLWEGTVKERKQNRNEESKMDLVLLANDFNDAQI  
NALFLETFGPGETSSATIEWMAELIKNP NEMAKVRKELDEIVGASNVKESHLPNLPYLQACIKEAMRL  
HPAAPFLPRRAVEKCEVMGYTIPKDCQVLVNAYAIGRDPKTWKGPSTFRPERFLES DIDYHGGHYQFIP  
FGSGRRTCIGMPLATRTIPLIVGSLVQTYDWSLPGGKRPEELEMKEMLSLSLAIDPSLCVVPK LRA

>HCACYP80-3

MEETFVIRKANLFYLLLLVLSLLFLILKHIRSPNNLPPGFPWPPIVGNILNMGNRPHISVAQLAKVHG  
PLMSLRLGTQLVVVGSSPAAATEILKTHDRILSGRCVPHATPASPNDVHLSMSWSDCTDQWRLRLTL CRT

ELFSAKVIESQANVRDKKVVVELVEFLATKEGKMVQIVEVVFATIFNMLSNLFVSRDFIKLDEKREDGGVK  
GLIKGLVELGFTPNLADLYDIFSGFDLQGLNKKSKEMFLKICGVWEVIVKERREGKSNDTSRQRDYLDAL  
LDSGLTNGHINYMFLELFLAGTDTSTSTIEWAMAELIKNPEAMKKVKIELEREINGNVVTESDLPQLPYL  
HSVVKETLRLHPPAPFLVPHCALETCKVMNYTIPKDTQIFVNVWAIGRDPNIWDDPLTFKPERFVSSMD  
LNSNNFRFIPFGSGRKICPGLPMAAKQVPLVLACLIKCFDWSLPHDITPSKLNMDKFGITVQKEKPLVL  
IPKVKKS

>JDICYP80-1

MELITGVVIAISFFLVYLLISNRLSRKGLPPGPRPWPIIGNLLQLGEKPHAFAKLAQKYGDLFTLRLGT  
ETVVVASSPAAAAEILKTHDRILSGRYVFSFRVKEHVENSIVWCQCNNDWKMRLKVCRTTELFTPKMIES  
QAHVREAKALEMVSFLRGKQGEVVKISEVVFGLVNIIFGNLLFSQDIFDLADPTSGSVEMKDHLWKMLQL  
GNSTNPADYFPFLGRFDLFGQRRVADCLQRIYDIWGALLKERRGSNASKDHHDFVNVLINAGIDDQKIN  
ALLMELFGAGTETTASTIEWAVAELTKNPHIAAKVRQELLNVLGKDPKESDIPRLPYLQAFVKETLRLH  
PATPLLLPRALETQVMNYTIPKDCQIMVNAWGIARDPKIWN DAMTFSPERFLNSSVDYKGNDFELIPF  
GGRRICPGIPLATQFIHLIVATLVQNF EWKLPKEMDPSDLTMEEFGLTLQKDPPLYIVPKSTL

>JDICYP80-2

MELTTALLYLIPTIFLIIFLKPRNKNYPPGPNPWPIIGSIPALFGSGTPMHVTLADMAHTHGPLMMVWL  
TQPTAVASTAESAMEILKTHDRILFAGRAIRMSFRLKHHIKYSLVWADTSEYWKLRLKIVRTEIFSPKMLQ  
VQEHVREEKVAELVEFLKGKEGQVVGVSQLVFGTLNINLGNVVFSDVFAVYVGAEGDKMQTLIKEMLMIG  
AAPNIAEFWPIFEFDFQGLKKKCDQRFKVVMQWEGTVEERKVKRNEEPKDMLDVLLVNDFNDAQINAL  
FLETFGPGSETSSATIEWAMAELIKNPNIMAKVRAELDQVVGKSTVKESDPLHLPYLQACIKETMRLHPA  
APFLLPHKSMETCKVMGYTIPKGIQVLVNAYAIGRDPKTWKDPTTFKPERFLESDIDYYGKHFQFIPFGS  
GRRQCVGMPLATRTIPLIVSNLVHKIDWSLPDGKRPEELVMNETLSLSLALDPTLSVIPKLRV

>MAQCYP80-1

MDLITCLAILTFFFLYFFITDHL SRKGLPPGPRPWPIIGNLLQLGEKPHSEFAKLAQTYGELFTLKLGT  
QTVVVASSPAAAAEVLKTHDRILSGRYVFSFRVMEHVENSIVWCQCNNDWKMRLKVCRTTELFTPKMIES  
QAHVREGKALEMVRFLRSKQGQVVKMTEVVFGLVNIIFGNLIFSQDVFELGDPTSGSVEMKEHLWRMLEL  
GNSTNPADYFPFMRFDLFGQRRDVAECLRQIYKIWGVILEERRRSGSKQNNDFVDVLLNAGIDDKINA  
LLMELFGAGTETSASTIEWAIAELTKNPHVTKKLRNELLNVVGKATVKESDIPRLPYLQAFVKEVLRHP  
PTPLLLPRALETQVMNYTIPKECQIMVNAWAIGRDPKTWTDPLTFSPERFLNSSVDYKGNDFELIPFG  
GGRRICPGVPLATQFIHLIVATLVQNF EWTLPKEMDAKDLTMEEFGLTLQKDPPLLIVPTARI

>MAQCYP80-2

MDLKTAFLYLIPIVLVYYYILFKPKHKNLPPGPKPWPLIGNIPVLFGSGKPLHVTLTDMARTHGPIITLWM  
GTQPTAIAASTAESAMEILKTHDRILFSGRAVRMSFRLKHHIKYSLVWADCSEYWKLRLKIVRTEIFSPKML  
QVQEHVREKKMEEMVEFLKGKEGEVLKLSPLVFGTLNINLGNVVYSKDVFGYFGDDGDQMQTLMKEMMI  
GAAPNVAEFWPILEGLDLQGLKKKCHERFTEVMKMWKGTVEERKVNREEPKDMLDVLLANDFNDDQINA  
LFLETFGPGSETSSATIEWAMAELIKNPKIIAKVREELDQVVGKSLVKESHLPNLPYLQACIKETMRLHP  
AAPFLLPHRSVEACTVMGYTIPKDIQVLVNAYAIGRDPKTWEDPTTFKPERFMESDIDYYGKHF EFIPFG  
TGRRQCVGMPLATRTIPLIVSNLVHAIDWSLPDGKNPEELVMNETLSLSLALDPTLTVIPKARV

>MCACYP80-1

MALLALFLIFALPILLYFLKPSKPNLPPGPFWSPLLGLTGLKSNEKQAHVVLTNLAQTYGPLMLLLKLG  
VKPVIVASTHVAAMEILKTQDHVLSGRCPHVSQVEDYIEASVVWADRNEHWKMVRKICRTELFSTKMLE  
SQASIREERVELIAFLRRREGEVVKISDVIIFGCMINVLGSVIFNQSVYDFEGKKTGMKGMIRELMILA  
ATPNLPDFYPIFDRFDIQGLRSTTSACWKRMSSEWAGIVKERRASRDHSRNDFLDVLIQANFTDPQIDAL  
FLEIFAPGSDSTTAMEWAMTELMRNPEKRLNVQNELKTVIGNRQVVKESDLPNLPYLHACVKESLRLHP  
PVTFLPHKATETQVMNYTIPKGTQLMVNAYAIGRDPKTWDDPLCFKPERFLNSEVDYQGNDFSLIPFG  
SGRRMCI GMPLASRVVRLIIASLIHNF DWSLPGGIKPSELDMQEMFELVLQKHVPLSIIPNARA

>MCACYP80-2

MEIVSTVAIGFIFFIIFIIFFFSNQRSTKGLPPGPKPWPIVGNLLQLGDQPHAQFAQLSQTGPLFSLKL  
GSQTVVVASSPSAATQVLKTHDRVLSGRYVFSFRIDRHVNNSIVWSECNDNWKLRLKVCRTTEVFSPKMI  
ESQAHLEAKAIEMVEFLRGREGQVLKIAEVVFGTLVNIIFGNLIFSQDVF DLADPTSGSAEMKEHIWRML



ELGNSTNPADYFPIMGKLDLFGQRRVAECLQQIYDVGAMLKERRATKGTETNNDNFVNVLLEAGLDDQR  
INSLLMELFAAGTETSASTIEWAIAELTKNPQIMAKIHSELESVVGKERVKESHIPHLPYLQAFVKETLR  
LHPATPMLLPRRALET CNVMGYTIPKDCQIMVNAWAIARDPKVWKDPLKFSRPERFLNSSLDYKGNDFEFI  
PFGGRRICPGLPLATQFISLIVGTLVQNMDWSL PNGMDPTELGMEEFGLTLQKEPPLLIVPKSRDFLN  
ETRG

>MCACYP80-3

MDLAVLLSLFVPAIILYLLKPKNVPPGPRSWPLLG NLLTVLRSHVPLHITLTDLARTHGPLMLVTLGTQ  
PTVLASTSEAAMEILKTHDRALSGRHIRMSFRLKEMNKHSLVSNCTDTWKLLRKIARTEIFSPKMLQIQ  
EHVREQKVLLEVEFLRGREYLGKAVKISQFVFGTLNIIIGNVVFSDVFGFSCDEGGDEIGMQSLIRELL  
MIGASPNIAEFYPILEGLDLQGLKRRCKDRVDRVNLWEGTVKERRLKRSGESKDMLDVLLDNGFDDVQI  
NVLFLETFGPGSETSSATIEWMAELIKNPDKLAKVRTELEQVVLHLSQVKESHPLHLHYLQACVKETMR  
LHPAAPFLLPHRAVETCRVMGYTIPKDCQVLVNAYAIGRDPNIWKDPSRFKPERFLESSVDYNGNHFEFI  
PFGSRRICIGMPLATRTVPLIVSSLVHNFWDWSL PDGKRPEELVMNEMLSLSLAIDPSLSIIPKVRG

>MCACYP80-4

MALLALFLLFALPILLYFLKTSSNPKNLPPGPF SWPLIGTLVMKLNKRPHVVL TNLARTYGPLMLLTF  
GIEPIAVCSTPEAAMEMFKTQDRVMSGRYVPHSVQVKGYIEHSMVWADCNEYWKMRKIYRTEL FSTKML  
EAQVSVREEKVKELMAFIKRKEGEVVKITDVVYGCILNILGSVIFNQNVYDFDGKTDNDAGMKGMVRQLM  
TLAGIPNFPDFYPIFGRFDPQGLKKKTTECVKRMNESWAGIVKERRASKDHSGNDFLDVLIQANFTDPQI  
DSLLEIFGPGSDSSTSTIEWAMADLMRNPEKLLKVQDELETVIGRNREVKESDLPNLPYLHACVKETLR  
LHPPVTFLLPHRATETCQMMNYTPKGTQTTVNTYAIGRDPKAWEDPLCFKPERFLNSEVDYQGNDFHYI  
PFGAGRRICPAVSLASRVSRLLIASFIHDFDWSL PNGMQPSELDMEAKFGLVLWKDDPLCIIPQNQSPI

>MCACYP80-5

MDSVLAILYLSIFFLTILLVKLFQHKSHKSNQLPPGPRWPILGNLVSILGSKTPPHITFANLARAHHGL  
MLLWLQKPLVVSDKEAAVEVLKTHDRVLSGRSITVSFRFREKTEYSLVWADCNDYWKLLRRILRTEIF  
SPKMLKIQERVREQKVTMELMRSSEGKEVTIRPLVFGTILNILGNVFSKDMFELGGRGDKVGLLEQLI  
RELLTIGSTPNIAAFFPIFEKLDPQRLKKRTWERLVKIDKLWESIVKERRQQRSEECKDMLDVLLANDF  
TDPQIDNIFLETFGPGSESSATVEWVMSSELIKNPQTFALRQELDNEFGQSKVITGSRLTNLPFLSAVI  
KETMRLHPAIPFMLPHRAVETCEVMGYTIPKDMEIQLNAYAIGRDPKAWKDPNTFRPERFLESIDYQGN  
HFELIPFGAGRRVCPGLPLAVKNTPLIVSSLVHGFWDWSL PDGLTHDQLQMNEVLSVALTKDPSLCLIPKV  
RIWAS

>MCACYP80-6

SHALRLLLLLLLLLFLFFFRDSSSKNLPPGPPFPPIIGNLHQLGSKPHSTLAQLAQTYGPLLSLRFQSQLV  
VIASSPAAAEVLKAHDNVLSGRHIIYNARSKNYVEHSMVWAPECNEAWKNLRRICRLELFSPKAMEARA  
GVRELKVEEMVGLRGKVGEVVKVSELVFGTIFNVLGGIFSKDVFDMRREDGVVVGDLKGHLCKMLELG  
SAVSLADCFPKLGMTGGRKVSEECRRNVFGSWEEIIRERRELSNYGVGLGDGDDDDDDGAKKDFLSS  
LIKAGFSNDQINTLLLDIFGAAADTTTSTIEWAMVEIMKNPHVLHKLQSELQLILMETSSKNNIITEAD  
LSHLPYLQATVKETLRLHPPTPLLP RRALQTCKVMNYTPKNSQILVNAWAIGRDTNVWENALKFWPER  
FLEDYKLGNNSFNFVFPFGGRRICPGMPLAAELTPLILGSLFHNFDWSLPMGMTPYDLTTEEFGLTLQK  
DPPLLLVPKERH

>NDOCYP80-1

MDLAILIFSIFILLFVFLVLDHNLGRKGLPPGPRWPPIIGNLLQLGEKPHAFAKLAQKYGDLFTLRLGS  
QTVVVASSPAAAAEILKTHDRILSGRYVQSFVKEHVENSIVWCQCNDNWKMLRKVCRTELFTPKMIES  
QAHVREVKALEMVKFLKTKQGEVVKVAEVVFGTLVNIIFGNLIFSQDVFDLADPTSGSVEMKEQLWRMLEL  
GNTTNPADYFPFMRGDFLFGQRRVAECLQQIYDIWGVMLKERRANSTRNVNNDNFVNVLLSAGLDDQKIN  
ALLMELFGAGTETTSSTIEWAIAELTKNPRIVRKIQEELNIVVGEAATATVKESHIPHLPYLQAFVKETL  
RLHPPTPLLP RRALETCQVMNYTIPKECQIMVNAWAIGRDPRTWNDALVFTPERFLNSNVYKGNDFEL  
IPFGGRRICPGIPLATQFIHLIVANIVHNFESL PNGMDVGLTMEDKFGTLQKDPPLYIVPKARTRY  
DLEHILPSINKIAGLNISIIETDLDGGTDLFVNICII

>NDOCYP80-2

MVVPFVLAFFVLFIAFPLLLFLKPSKPNLPPGPF AWPILIGTILPNEKQPHVELTNLAQTYGPIMLLKFG

VEHVVVVSTNEAAMQVLKTHDLVLSGRYAPNSVKIKGYIEYSMVWVWDCNEYWKMVRKIWKTELLSTKMLD  
AQACVREEKVMELVDVFLRGKRGHVVKFADLIYGCLLNILGAVIFSQNVDYDFDDTSNNELGMKAMIRELMV  
LAANPNLADLYPMLGGSDFFQGLRKATAACVKRMNELWGSIVRERRKTNAHFKNDFLDVLIKADFSDPQI  
DAMFLEIFGPGSDTSTSTIEWAMAELLRSPEKLNVRKELNNVVLGKQVKESDLNLPYLNNAVVKETLR  
LHPPATFLLPHRAIEECQVMGYTIPKGCQLMVNTHAIGRDSKTWVNDPLSFNPERFLDTEIDYQSSTDFK  
YIPFGAGRRICPGLSLAARVVPLVLAASLINTFDWVSLPNGMDPSELDMEEKFGAALWKEVPLLIIPKVQ  
>NDOCYP80-3

MELTTSLLCFIPIILLYILFKPSNKNLPPGPKPWPLIGSIPALFGSGSPLHVTLADMARTHGPIMTLWL  
TTPTVVASTPESAQEILKTHDKHFSGRAIRMSFRLKHHIKYSLVWADCSEYWKLLRKIVRTEIFSPKMLQ  
VQEHVREAKVAELVEFLKGEQVVRSLVFGTLLNIGNVVFSKDVFRYADGEKDKMQLIKEMLMIG  
AEPNLAEFWPILEELDLQGLKRCNDRFLEVMMWEGTVEERKVKRNEEAKDMLDVLANDFNDAQINAL  
FLETFGPGSETSSATIEWALAEVKNPKILAKVREELDRVVGESTVKESHLPYLPYLQACIKETMRLHPA  
APFLLPHRSVEECNVMGYTVPKDYGILVNAYAIGRDPNSWKDPTTFKPERFIESDIDYYGKHFQFLPFGS  
GRRQCVGMPLARTIPLIVSNLVHRIDWVSLPDGKPVVEELVMNETLSLSLALDPTLTVVPKVRV  
>NDOCYP80-4

MFMKIMEETIAMEGINFLFLLLLLLVLLVLLCFIYKYITSPTLPPGPFWSPIIGNILAIGKRPHVSLAQL  
AQAHGPLFSLRLGAQLVVVGGSSPAAHEILKVHDRLLSARSIPNAAKPNPAYTYCSVGWADCTDQWKYL  
RNICGSELFSTKAIESQSKLREDKVIELVEFLGTKEGQVVNIGEVVFATAFNMLSNILVSKDFINLEGER  
GGEGMKGIVRTYVEVGITPNIADFYPIILGVFDLQGLKRKSMESFVKICGFWEGIIKERRESKGDVSMRQ  
RDFLDYLLSIGFNNDQINHLLELFLAGVDTTTTPTIEWAMAELIKNQKTMKNVRDELEREINKNCVNESD  
LVRLPYLHSCIKETRLHHPGPLSIPRALETCKVMNYTIPKGSQVFNLWAIGRDPMTWVNDPLVFKPER  
FLDASVESNSSGFGWIPFGAGRRSCPGQPMANKQVPLIIASLIKRFDWVSLPHDMNPSELNMDETFGLTLQ  
REQPLILIPKVKK  
>NDOCYP80-5

MDLTSAILIIPFFAIPFILMAFKLKHKNLPPSPPGWPILGNLPTLFSHGNEPLHITLTNMAPTYGPLLLL  
RLCQKRIVVASTTEAMEILKTHDRALSGRVIPSSFRIDYHIKHSIVWSDCNDTWKNIRKILRTEIFAPK  
MLQVQEKIREGKVRDMMNFIRGKQGNVVNRQWVFGCLLNILGQAVCSKDVVVYSDDGDKVGMQTLRDM  
LINSGTPNIGYFPILDPLDLQWLRRCNQLFRQGVKLWEGTVKERRLCRNEESMDMLDVLANDFNDDQ  
INALFLETFGPGSETSSSTIEWALSELIRNPDMAKLRKELDQIVGKSTVKESHLPYLPYLQACIKETMR  
LYPSAPFLLPHKAVETCQVMGYTIPKGYGILVNVAIGRDPKLWKDPLTFTPERFLECDMMNYNGTNFQF  
LPFGAGRRICVWPLAERTIPLILSSLVHGFWDVLPDGKHHEDMEMNQVLHISLNKDPPLAVIPKMKK  
>NDOCYP80-6

MLLKFGVEPVVVASTNEAAMQVLKTHDLVSGRFAPNSVQIKGYIEHSMVWVWDCNEYWKKVRKIWKTMQF  
TKMLDAQAFVREEKVMELVDVFLRGKQGHVVKFADLIFGCILNIGAVIFSQNVDYDFDDTSNELGMKGM  
RQLMVLAAPNLADLYPILGSSDFQGLRKASAAACVKRMNEYWGSIVKERRKKNCHLKNDFLDVLLKADFS  
DPQIDAMLLEIFGPGSDTSTSTIEWAMAELLRSPEKLTVRKELNNVVLGKQVKESDLNLPYLNNAVVK  
ETLRLHPPVTFLLPHQAIEECQVMGYTIPRGCPMLVNTYAIGRDPKTWKDPLSFNPERFLDTEIDYQSG  
NDFKYIPFGAGRRICPGLSLAARVVPVLAASLINTFEWVSLPNGMDPSELDMKDKFGLALLKEVPLLIITL  
FFLTSMAGISTSSTKRCAVVTGANKGIGLEICRQLPSNGVLVLTARDEKRGVEAVENLRQCGLSDVVFH  
QLDLMNSTSIASLAEFIQTQFGKLDILVNNAAIHGTTIDNDALKAQSHGNAWSALTGAMVQTYELAECCI  
NTNYHGTGKVTEALLPLLQLSNSARIVNVSSKIGQLENISNEWAKEMLSNVDNLTEEKIDDLVNEFLKDY  
KEGLLEIKGWPIAPSAYRISKAAVNAYTRILAKKFPMISINCCTPGFVKTDMSAHIGRLSVEDGAKAVVM  
IALLPDGGPSGLFFVQKEVASF  
>NDOCYP80-7

KSWKKPLQRKVSISLFLLLLLLVLLVLLCFIYKYITSPTLPPGPFWSPIIGNILTIGKKPHISLAQLAQAYGP  
LISLRLGTQLVVVGGSSPAAAMEILKVHDRLLSGRSIPDVIPAKNPAFTKCSLAWNDCTDQWKYLRTICRS  
ELFCIRAIESQSKLREDKVIELVEYLGTEGQVVNFGEVVFVGFVFNMLSNILMSKDFINLEEEGEGEGMK  
GLVRTLVELGTIPNLADLFPLLSVMDLQGLKKKSTEFVKICGFWEGIIKERREGRDKDVLIRQRDFLDY  
LLSIGFNNDQINRLVELLLAGADTTTTSTIKWTMVELMKNQDAMKKVCIELEREINENRVKESDLHRLPY  
LNSCTKETLRLHPPAPLLLPHRALETCKVMNYTIPKDTQVFNLWAIGRDPMTWDDPLVFKPERFLDSNV

ESKLNDFGWIPFGAGRRICPGQPMAMKQAVLILASLINHFESLPCDISSTLNMDEKFGITLQKEQPLI  
LIPIIK

>NSACYP80-1

MEFFSIAIVSSFFFLFLIFILRDSRPKNLPPGPRPSPIVGNLLQLGDKPHSEFAKLSQTYGELFSLKLG  
QTVVVASSPAAATEILKTHDKNLSSRYVFQSFVKEHVANSIVWSDCSENWKLKRKICRTELFTPKMIES  
QAYIREAKALDMVKFLKKEGEVVKIVEVFGTLVNIIFGNLIFSQDVFDLEDPNGGSAELKQHLWKLLEM  
GNSTNPADYFPFLGKFDLFGQRRVAEVLHQIYDVWGVMLKERRAMNGTENDFVSVLLSSGLDDQKINSL  
LMELFGAGTETSASTIEWAIAELTKNPSIASKLQSELLSIVGDRVAVKESDIPSLPYLQAFVKETLRLHPA  
TPLLPRRAPNTCKVMKYTIPKDCQIMVNAWAIGRDPKTWDDPLSFKPERFLDSNLDKGNDFELIPFGG  
GRRICPGLPLASQFISLFIATLVQNFWDWVSLPQGVSSNDLSMDEKFGTLQKDPPLLIVPKLRISSV

>NSACYP80-2

MDVQVALFSIIPAILAFLLSKFKKNFPPGPPSWPLIGSMPILFNSVTPLHITLTMARTYGPMMTLWL  
GTQPTVIASBPESAMEILKTHDRACSGRHIRMSFRLKHHIKYSLVWADCTDYWKLKRKIARTEIFAPKML  
QAQSHAREEKVGELEIYELGRKQGQAVKINQVFGTLLNILGVSFVSKNVFEFSDDDGDKESMQLIKQML  
MIGAAPNLAEFYFPLETDLQGLKRRCCDRFTQVMKFWEGTVKERRERRNEESKMDLDVLLANDFNDSQI  
NALFLETFGPGETSSATIEWTMAELIKNPKEMAKVRKELDNVVGSSVKESHPELQACIKETMRL  
HPAAPFLPRRAVESCQIMGYTIPKGCQILVNAYAIGRDPKAWKEPDRFRPERFLETEVDYHGGHFQYIP  
FGSGRRTCVGMALATRTLPLIVGSLVNTYDWGLPDGKKPEELEMKEMLSLSLAIDPSLLVVPTLRA

>NSACYP80-3

MEINLYYYLVLPLIFLIKHISATNLPPGPFPPVIGNILSMGTKPHVSLAQLAKSYGPMVMRLG  
TQILIVGSSPAAATEILKTNDRVLSARKVVHALPASPDRHLFSVTWSDCTDQWKYLRTRLIRTELFSAKVI  
ESQGMRRERKVSEVVEFLRTKEGKPKVIGVIVFNTIFNMLSNLLVSRDLIDLHQENEDEGLKGFVRKFVE  
LCSCP NLADYYTMSGLDLQGLNKKARKMFQEISMIWEVVIKERRDAQSHGNL SREPDLLDTMLDRKLT  
NDHISYLFLELFLAGTDPSTSTVEWAMAELMKNPNALKIVRSELATEINGSVIKESDLSRLPYLQSVVKE  
TLRLHPAAPFLPHRALETCKVMNYTVPKDSQVFNIAWAIGRDPNVWEEPMSFKPERFLNQSHNDLNSTN  
IPFIPFGAGRRICPGQPMVAKQVPLVLA SLINCFEWSLPHGVHPTDLDMEEFVIVLQKDKPLILIPQVI  
LQ

>NSACYP80-4

MLEMDYYYYLVLPLVFLIWKHIKPPTNLPPGPFPPVIGNILNLGNKPHVSLAQLAETYGPVMSLRL  
GTKLLIVASSPAAATEILKTHDRIFSGRTIPHAIPAYPDRIHLSMGWADCTDQWKFLRTLCRTELFSAKA  
IQSQANIREDKMKELVMFLATKEGQSVKIEEVFNNTIFNTLSNLFSLKDLMSLQEGDQLRNFVRTFIQLI  
FTPNLADYYISILSGLDLQGLNKKCKEMIEKICGVWGVIIIRERRQEDKDSGVTRPRDFSDSLIHAGLTDEQ  
INYLFMELFFAGADTSTSTIEWVMAELIKNPQVMRKVCGELESRKETVIINDSDLPYLPYLHATVNETL  
RLHPPAPFLIPHRAIETCTIMNYTIPKDAQVFNVAWALGRDSKTWEDPMSFRPERFLESGLDINSGLDFR  
IPFGGRRICPGLPLAAKQVPLLVANLINCDFWVSLPLDMEPAHLCMDEKFGITLQMEKPLVLPVPRKKKW  
>NSACYP80-5

>NSACYP80-5

LYYYLVLPLIFLIKHISATNLPPGPFPPVIGNILNMGKPHVSLSQAETHGPLMSLRLGTQLL  
IVASSPSAATEILKTQDGLSGRTVPHAI PVSPDRHLHSLGWADCTAQWKFLRTLCRTELFSAKAIQSQA  
NVRDDKVKELVMFLATKEGQSVKIAEVFNNTIFNTLSNLLSNDLVSLQEGDQLRNFVRTFIQLISTPNL  
ADYYISILSGLDLQGLNKKAREIFEKTCGVWEVVIIRERRKEGESGSRQRDFLDSLINSGLTNDQINYL  
ELFSAGTDTTSTVEWAMAELIKNPQVMRKARLELENEIKETAIKDSLPCLPYFRAIVNETLRLHPPA  
PLLLPHRATETCKLMNYIIPKDAQVFNVAWALGRDSKTWEDPMSFRPERFLESGLDSSSNFKFIPFGAG  
RRVCPGLPVAARQVPILVANLINFDFWVSLPLDMEPGHLCMDEKFSITLQMEKPLVLPVPRKKKW  
>PBRCP80-1

>PBRCP80-1

MEIVTAALIAIVITTFYLIIFRDSSPKGLPPGPKPWPIVGNLLQLGEKPHSQFAELAKTYGDLFTLKLGS  
ETVVVASTPLAASEILKTHDRVLSGRYVFQSFVKEHVANSIVWSECNDTWKLRKVCRAELFTQKMIES  
QAEIRESKAMEMVEFLKRNQGESEVKIVEVFGTLVNIIFGNLIFSQNIKLGDESSGSVEMKEHLWRMLEL  
GNSTNPADYFPFLGRFDLFGQRKDVADCLQGIYSVWGAMLKERKIAKLHNNSKKNDFVEILLDSDGLDDQ  
INALLMEIFGAGTETSASTIEWALSELTKNPEVTANMRSELLSVVGKRPVKESDIPNMPYLQAFVKETLR  
LHPATPLLPRRALETCKVLNYTIPKECQIMVNAWGIGRDPKRWDPLKFAFERFLNSSIDFKGNDFELI

PFGAGRRICPGVPLATQFISLIVPTLVQNFWDWGLPKGMDPSQLIMEEKFGLTLQKEPPLYIVPKNRD

>PBRCP80-2

MEIVTLAALIAIVITSFFYLILRDSSPKGLPPGPKPWPIVGNLLQLGEKPHSQFAQLAGTYGDLFTLKLGTQTVVVASTPLAASEILKTHDRVLSGRYVFQSFRIKHNHVQNCMVWSDCNETWKSRLKVCRTTELFTKRMIESQAEVRECKAMEMVEYLRKHQGNEVKIVEVIFATLVNIFGNLIFSQNIKFLSDENSGSVEMKEQIWRLLLEGNSTNPADYFPFLGSLDLLGQRKDVADSLQEIYGVWGPILTEKKLAKQHNTNTTNDFVLDLLDSSLNDQQINAFLEIFSGTETSATTIEWALAEIKNPELTANIRSELLSVLGKRTVKESDIPNLPYLQAFVKETLRLHPATPLLLPRRALETCQVLNYTIPKGCQIMVNAWGIGRDPKTWTDPLKFAPERFLSSSIDYKGNDFEIPYAGARRICPGMPLATQFISLIVPTLVQNFWDWGLPKGMDPSELIMEEKFGLMLEKEPPLYIVPKTRE

>PBRCP80-3

MMALENSIRERKRENIKMDIVTLAALIAIVFTIFFFLILRDSSPKGLPPGPKPWPIVGNLLQLSDKPHSHFAQLAKTYGDLFTIKLGTETIVVASTSIAATEILKTHDRILSGRYVFQSFVRKGVKLSMTWSDCNDTNKLRICKVELFSQKMIESQAEIRESTALEMVEYLKKEGSEVKMSDVIKGTVMNMFGKSIFSQNIFELGDENSGSLNMRIRRLMELGNTKNPADYFPFLGSDWLLGQRKEVANCLQRVYDVWGVVLERKIFNMQHNSKKKNDFVDVLLDAGLEDGQINSLIMEIITGTETSGSTIEWAVAELTKNPQVAAMRSELLSVVGQRPIKEADIPNMPYLQAFSKETLRLHPPTPLIPRRALETCILNYTIPKDCQIMVNAWGIGRDPKTWTDPLKFSPERFLNSSIDFKGNDFGYIPFAGARRICPGMPVAIQFLSILVPTLVQNFWDWGLPNETDPTQLIMEEKFALTLQKEPPLYIVPRTRDPSA

>SCACYP80-1

MEIVTVALLIAVVISSILYLLFRDSSPKGLPPGPKPWPIVGNLLQLSDKPHAQFAELAQTGYGDLFTLRMGTQTVVVASTPSAATEILKTHDRILSGRYVFQSFVRKGVHENSIVWSECNDTWKNLRKVCRTTELFTQKMIESQAHVRERKAWEMVEYLKKEGEEVKIVEVIFGTLVNIIFGNLIFSENIFELGDPSSGSVEMKEYLWRMLELGNSTNPADYFPIMGKFDLFGQRKAVAECLOGIYDVWGA MLKERKAAKAGGSEKGNDFVNIILLDSSLNDQQINALLMELFGAGTETSASTIEWAITELTKNPVTAIRSELLSVVGQSTVKESDIPNLPYLQAFVKETLRLHPPTPLLLPRRALETCQVMNYTIPKECQIMVNAWAIGRDPKTWTDPLNFSRPERFLNSSVDFKGNDFELIPFGGRRICPGVPLATQFISLIVGTLVQNFWDWLPNGMSPRDLKMEEFGLTLQKEPPLCIVPKSRA

>SDICYP80-1

MEIVTVALLIAVVISSILYLLFRDTSKGLPPGPKPWPIVGNLLQLSDKPHAQFAELAQTGYGDLFTLRMGTQTVVVASTPKAAAELKTHDRILSGRYVFQSFVRKEHVKNISIVWSECNDTWKSLRKVCRTTELFTQKMIESQAEVRERKAWEMVEYLKKEGEEVKIVEVIFGTLVNIIFGNLIFSQNIQFDLGDPSGSVELKEHLWRMLELGNSTNPADYFPIMGRFDLFGQRKEVEDCLOGIYDVWGA MLKKRKAKEAGKSEGRNDFVEILLDSSLNDQQINSLMELFGAGTETSASTIEWAITELTKNPVTAIRSELETVVGHNTVKESDIPNLPYLQAFVKESLRLHPPTPLLLPRRALETCRVLNYTIPKECQIMVNAWAIGRDPKIWDPLTFSPERFLNSSIDFKGTDFFELIPFGGRRICPGIPLATQFIGLIAATLVQSFWDLPNGMSPKDLNMEEKFGLTLQKEPPLYIIPKSRD

>TCOCYP80-1

MEIITLSIGFIFFIIFIFIFNNQSSKGLPPGPKPWPIVGNLLQLGEKPHAQFAQLSQEFGLFTLRLGSGTQVVVASSPAAATQILKTHDRILSGRYVFQSFRIKHNHVNSIVWSECNDNWKMLRKVCRTTELFTAKMIESQAHVREAKAMEMVKFLRHREGEVVKIAEVVFGTLVNIIFGNLIFSQDVFVLDSDPSSGSAEMKEHIWRMLELGNSTNPADYFPIMGKLDLFGQRRAVEECLQIYDIWGVMLKERRARKGSENTHDFVNVLLLEAGLDQCINSLMELFAAGTETSSTIEWAIAELTKNPRITTKLRQELRDVIGEERVKESHIPSLPYLQAFVKETLRLHPATPMLLPRRALETCVMGYVIPKDCQIMVNAWAIGRDPKVWDPLTFWPERFLNSSLDYKGNDFEIPFGGRRICPGFPLASQFISIIIVATLVQNMWDWCLPNGTDPSELMEEKFGLTLQKEPSLLL VFKSRDLK

>TCOCYP80-2

MDPTVALILCLVIPVILLISFLYKPRNLPPGPHAWPLVGS LPAVLSSGAPLHITLTNLARTHGPLMLVTLGTQPTVLASTSEAMEVLKTHDRALSGRHIRMSFRLKEMNKCSLVWSNCTDYWKLLRKIARTEIFSPRMLQIQEHVRERKVGELVEFLRGRKEGKAVKISEFVFGTLNIIIGNVVFSDVFGFDDEGGDKIGMQSLIREL LMIGASPNAEFYPILEGLDLQGLKRRRCRDRVNRVKNLWETTVMERRKRSVAEGWESKDMLDVLLDNNFDDVQINVLFLFMFGPSETSSATIEWVLAELIKNPDKMAKVQKELEKLVGNKGSQVKEAHL PDLPYLQACVKETMRLHPAAPFLPHRAVETCQVLGYTIPKDYQLLVNAYAIGRDPNTWKDPTSFCRPERFLDSSVDFYGNHFEFIPFGSGRRICIGMPLATRTVPLIVASLVHNFWDWLPDGKRPEELVMNEMLSLSLSDPSLSVVPK

TRA

>XSICYP80-1

MEVLSIAIVSFLFLLFFILRDSRQKNLPPGPRPSPIVGNLLQLGDKPHAEFAKLAQKYGELFSLKLG  
QTVVVASSPAAAAEILKTHDKILSGRYVFQSFVKEHVENSIVWSECNENWLLRKCRCRTELFSPKMIES  
QAGIREAKAREMVKFLRSKEGEVVKIVEVVFGLVNIIFGNLIFSVDVDFLEDPGGSSELKEHLWKLDM  
GNSTNPADYFPIGKFDLFGQRRVAEVLQQIYDVWGVMLKERRGRKVSSENNDFVNLINAGLDDQKIN  
ALLMEMFGAGTETSASTIEWAITELTKKPPVASKIRLELVNVVGDNTVKESDLPHLPYLQAFVKETLRH  
PPTPLLLPRRALETCTVMNYTIPKDCQIMVNAWAIGRDPKTWDDPLNFKPERFLSSDQDYKGNDFELIPF  
GGGRRICPGLPLASQFISLIVATLVQNFESLQGMSTSELSMDEKFGTLQKDPPLLIVLKARASNDLS  
FI

>XSICYP80-2

MEELIVVLRNLLYYISLIALPLLFLILKQIKSPSNLPPGPFWPPIVGNILNMGSKPHISLAQLAKSHG  
PLISLRLGTQLVVVGSSQAAAKEILKTHDRILSARCVPRVIPVYDQLHLSMAWVECNDQWRYLRRLCRT  
ELFSAKMIESQASVRDKKTNELVEFLANNEGKLVKIGDVVFATVFNMLSNIFVSKDFISLEEESEDGGMK  
GLLRRFMELGSAPNLADFYTILSGLDLQGITKKSKEMLGQVNGAWGVITKQRRADKGNVLRQRDFLDSL  
LDSELDQDQINYLQELFLAGADTSTSTVEWAMVELIKNPKAMRKVCAELERETSGHIVKESDLPRLPYL  
HFTVNETLRHPPAPFLLPHRALETCKVMNYTIPKDCQVLVNAWAIGRDPNTWEDPLSFKPERFLDSGMD  
LNSGNFKFIPFGAGRRICPGLPMAAKQVTLILACLINCFEWSLPHSMLPSELMDDDKFGITLHKEKPLLL  
IPKVRKA

>XSICYP80-3

MDLQIALFSLIPVILVFILLKPKYKNLPPGPHWPFIGSLPILFTNTEVPLHITLANMARTHGPMILW  
LGTQPTVMASAEAMEILKTHDRIF SARHIRMSFRLKHHIKYSLVWSDCTDYWKLLRKIVRTEIFSPKM  
LQAQSHVREQVAELIEFLRSKEGQVVKISQFVFGTLLNLLGNVVFSDVDFVYSDSDKGGIQLIREML  
MIGAEPNVAEFYPILEELDLQGLKCKDDRFIRVMKMWEGTVTERKANRNEESKMDLVLLANDFNDAQI  
NALFLETFGPGSETSSATIEWIAELIKSPKEMAKVRKELDEVVGTSTIKESDLPQLPYLQACIKEAMRL  
HPAAPFLLPRRAETCEVMGYTIPKGSQVLVNAWAIGRDPKSWKDPTIFRPERFLESQVDFHGAHYQFIP  
FGSGRRTCVGMPLATRTIPLIVGSLVHTYDLGLPGGKRHQELEMNEMLSLSLAIDPSLCVVPKARA

>BSTCYP80A1

MDYIVGFVSISLVALLYFLLFKPKHTNLPPSPPAWPIVGHLPDLISKNSPPFLDYMSNIAQKYGPIHLK  
FGLHSSIFASTKEAAMEVLQTNKVLVSGRQPLPCFRIKPHIDYSILWSDSNSYWKGRKILHTEIFSQKM  
LQAQEKNRERVAGNLVNFIMTKVGDVVELRSWLFGCALNVLGHVVFSDVDFEYSDQSDEVGMDKLIHGML  
MTGGDFDVASYFPVLARFDLHGLKRMDEQFKLLIKIWEGEVLARRANRNPEPKMDLVLIANDFNEHQI  
NAMFMETFGPGSDTNSNIIEWALAQLIKNPKLAKLREELDRVVGRSSTVKESHFSELPYLQACVKETMR  
LYPPISIMIPHRCMETCQVMGYTIPKGMVHVNAWAIGRDPKDWKDPLKFQPERFLDSQDIEYNGKQFQFI  
PFGSGRRICPGRPLAVRIIPLVLAFLVHAFGWELPDGVPNEKLDMEELFTLSLCAKPLRVIPKVR

>CJACYP80G2

MDLQIALFSLIPVILVFILLKPKYKNLPPGPHWPLIGNLPILFTNTEVPLHITLANMARTHGPMILW  
LGTQPTVMASAEAMEILKTHDRIF SARHIRMSFRLKHHIKYSLVWSDCTDYWKLLRKIVRTEIFSPKM  
LQAQSHVREQVAELIDFLRSKEGQVVKISQFVFGTLLNLLGNVVFSDVDFVYGDDETKGGIQLIREML  
MIGAEPNVAEFYPSLEELDLQGLKCKDERFIRVMKMWEGTVKERKANRNEESKMDLVLLANDFNDAQI  
NALFLETFGPGSETSSATIEWIAELIKSPKEMAKVRKELNEVVGTSTIKESDLPQLPYLQACIKEAMRL  
HPAAPFLLPRRAETCEVMGYTIPKNSQVLVNAWAIGRDPKSWKDPSTFWPERFLESQVDFHGAHYQFIP  
FGSGRRTCVGMPLATRTIPLIVGSLVHNYDFGLPGGNRPEDLKMNEMLSLTLAIDPSLCVVPKARA

>ECACYP80B1

MGTETVVVASTSSAASEILKTHDRILSARYVFQSFVKEHVENSIVWSDCTETWKNLRKVCRCRTELFTQKM  
IESQAHVREKKCEEMVEYLMKKQGEVVKIVEVIFGLVNIIFGNLIFSQIFELGDPNSGSSEFKEYLWRM  
LELGNSTNPADYFPMGLGKFDLFGQRKEVAECLKGIYAIWGLMQLERKLAKKVDGYKSKNDFVDVCLDSGL  
NDYQINALLMELFGAGTETSASTIEWAMTELTKNPKITAKIRSEIQTVVGRSIVKESDFPNLPYLEATVK  
ETLRLHPPTPLLLPRRALETCTILNYTIPKDCQIMVNAWGIIGRDPKTWTDPLTFSPERFLNSSVDFRGN  
FSLIPFGAGRRICPGLPIANQFIALLVATFVQNLWDCLPNGMSVDHLIVEEKFGTLQKEPPLFIVPKSR

V

>HNICYP80F1

MYIEDTSEIFTIFFTHILLPLLSFFIIRCVISSRKKLPLPPGPFWPPIIGHLFYLGNKPHVSLAKLANVH  
GPHLMSIRLGGRLVIVASSPMATAEVLKTHDRLLSGRFVSHPMRVEGSYIRNLATETLEECDENWKKVRS  
MYQIVLFSHKAVESQVNIREKKVMELVKFVASKEGELVNIKGIAFVTILNLSNSTISNDLVDFEGKGIG  
EGMREWIRNYTKLEGVPQLADLFPILDGCTWDFQGTYYKLDKDTFERISDVWRDIINKRMEISNKYYEGE  
DFADALIRNGFEDKQINALLMELYSAGTETTITVWTLVELLKNPEAMKRLRNEIKKELTTIDDREIMI  
VKDSNLPNLPYLEACMKETLRHLHPPAPLLFPHRAVQTCEVMGYRIPQDTQIIVNVWKMARDSEYWNDDPW  
SFKPDRFLDSSTDYKGHDFEFIPFGSGRRICAGQSLALRMLPMIVGSLVHNFELILPNNMNPMMEMMDDI  
IDVTMAKKDPLFIIPKIRNS

>PSOCYP80B1

MIESQAEVRESKAMEMVEYLKKNVGNEVKIAEVVFGTLVNIIFGNLIFSQNIIFKLGDESSGSVEMKEHLWR  
MLELGNSTNPADYFPFLGKFDLFGQSKDVADCLQGIYSVWGAMLKESKIAKQHNSKKNDFVEILLDSGL  
DDQQINALLMEIFGAGTETSASTIEWALSELTKNPQVTANMRLELLSVVGKRPVKESDIPNMPYLQAFVK  
ETLRLHPATPLLLPRALETCKVLNYTIPKECQIMVNAWGIGRDPKRWDPLKFSPERFLNSSIDFKGND  
FELIPFGAGRRICPGVPLATQFISLIVSSLVQNFWDWGLPKGMDPSQLIMEEKFGLTLQKEPLYIVPKTR  
D

>TFLCYP80B4

MEVLSAAMVSLFFIFLFIFFILCDSRNKDLPPGPRPSPIVGNLLQLGEKPHAFAKLAEKYGELFTLKL  
SQTVVVASSPAAAAEILKTRDKILSGRYVFQSRVYEHVLSIVWSECNENWKLRLKVCRTLFSPKMIE  
SQAYIREAKALDMVRFLRKKENQEVKIVEVFNLTVNIIFGNLIFSVDVDFLEDPTGGSDELKEHLWKL  
MGNSTNPADYFPIMGKFDLFGQRREVAKVLKQIYDVWGVMLKERRSITGHRENDFANVLLNAGLDDQKIN  
ALLMELFGAGTETTASTIEWAITELTNLRLVISKLRAELINVVGHKTVKESNIPLPYLQAIVKETLRHL  
PPTPLLLPRALETCKVMNYTIPKECQIMVNAWAIGRDPKTWDDPLTFKPERFMNSTVDYKGNDFELIPF  
GGGRRICPGLPLASQFLSLIVATLVQNFWDWSFPQGMTNEVPMDKFKGLPLQKDPPLIVLKARTSMKLO  
D

CYP82

>HSACYP1A2

MALSQSVFSAATELLASAIFFCLVFVWLKGLRPRVPKGLKSPPEPWGWPLLGHVLTGKNPHLALSRMSQ  
RYGDVLQIRIGSTPVLVLSRLDITRQALVRQGGDFKGRPDLYTSTLITDQSLTFSTDSGPVWAARRRLA  
QNALNTFSIASDPASSSSCYLEEHVSKEAKALISRLQELMAGPGHFDYPNQVVSVANVIGAMCFGQHFP  
ESSDEMLSLVKNTHEFVETASSGNPLDFFPILRYLNPALQRFKAFNRFLWFLQKTVQEHYQDFDKNSV  
RDITGALFKHKKGPRASGNLIPQEKIVNLVNDIFGAGFDTVTTAISWSLMYLVTKEPIQRKIQKELDTV  
IGRERRPRLSDRPQLPYLEAFIETFRHSSFLPFTIPHSTTRDITLNGFYIPKKCCVFNQWQVNHDP  
WEDPSEFRPERFLTADGTAINKPLSEKMMFLGMGKRRICIGEVLAKEIFLFLAILLQQLFESVPPGVKVD  
LTPYIYGLTMKHARCEHVQARRFSIN

>AMECYP82-1

MDNFLLQFQPIISIAAFFVALVFLYWSYGRKSNKTLKPRAPEAAGGRPITGHLHLFYGEELTHRKLGSMA  
KYGPVFNIRFGSHKTLVVSINWEIVKECFTTNDRLFNSRPGTLAIKLMFYDTDSVGYAPYGNVWRELKIS  
TLKLLSNHRIETLKHRTSEVESCFKQLYNQWEMKNENRVEVDKLGFAVSRMDNWFGLTFNVVARIVAG  
KKNFAGGAVNGDIGAQRYKVAMDESFRMLTFAYSIVPSLKWLDKLRGLIRDMKRCGSEIDSIVASWVE  
EHRLKRNSSENNDLEEDFIDVCLDIIESSSLPGDDPDTVIKSTCLDMILGGSDDTTTTLTWAISLILN  
NPHVLKRAKEELNSVVGKDRRVEDSDIPLHTYIHAIKETMRLYPAGPLIERTMEDCEVGGYHVPAGTR  
LLVNVWKMQRDGDVYKDDPLVFRPERFMTSNADVDLKGQHFELIPFGAGRRICPGVSFAVQLMHLVLARL  
LHEFEITTIPTSEPKVDMSESGLICHKIKPLEVLIKPRLELN

>AMECYP82-2

MDFSSILLLLNINCFTTSLVTLVLMVFLYNNTRFTKPKGNKMIKPPRLPGARPLLGHHLFGPGELP  
HKVLSTMADKYGPAFTIKFGKHTLVVSDIHTIKECLTTNDILFSNRPSSIAFDLMTYADDSVAFAYHSP

YWRELKISTLKLSSNNRLQSIKQLRLSEVNVCFKELYSLCNNNNKSGAPVLIDMKKWFKEVTTNIVIRV  
IVGKQNFSGKIVRGEDQEAANYKKIMDELSRLAKLSMFSYAPLLSLFDYFRGNVSAMKRNGKELNAMLQ  
NWLEEHRKKNSSISNDDEQDFMDLMSIIDETKLYGRDADTFIKAISLSMIVGGIDTVVVTLTWILALI  
MKNPFALKKAQEELDFVVGKERQVEDSDLKNLVYMNAIVKETLRLYPLSCILERDTKEDCEVGGYYVEGG  
TRLLINAWKLQRDPNVWTDPSFKPERFLNENADIDVGGQHYELIPFGAGRRVCPGVSFALQFMDLVLAR  
LIHGYELGTLNGEDVDLTKTEGQINFKATPLDLIVTPRLHPNLYDY

>BTHCYP82-1

MESIEFLVTLTLLSLLALFCAYAWKRKNHTKDSKIKEPPQPAGAWPIIGHLHLISRGGPLHINMGAMADKY  
GPVFMIRLGNRAVIVSNTEIVKECFTTNDKFLNRPVGLALNLMCYNAMFGFCRYGYPWREIHKIVML  
ELLSNSRLESCLKHVWDSEISTSIIEELYQLCQTQNKTHEGPVLVEMKDWFAFMALNVSLRMIAGKRYFGAS  
AGGNKDEARKCQKTIRDFRVLVGLFIVSDALPFLRWLDLGGHQKEMKRTFEDLDYMLQGWLDEHKLNRKS  
GVNGDQDFMDVMSILDDSKFPDYDVTVNKATCFQLIIGGDTTTVTLTWALSMLNHPHVLKKAQDEL  
DIQVGKHRQVEESDIKNLKYLEAVIKETLRMRPVGPLLGPRETIEDCTIGGYRVRAGTRVMVNAWKVHRD  
PSVWSNPDDFKPERFLKIDFRDQNFEPFPGSGRRACPGISFAVEVLPALARLLHGFELKTQLGCKV  
DMTEHAGLVHAKATPLEVLVSPRLSRELYVSS

>BTHCYP82-2

GSLALIAIIILSNIVKSSKSLSSKGGKSAPVVHGAWPVIIGHLHLLMGKELPHHALAKLADKYGPAFTLN  
IGAYQELVISTRDLAKECFTTKDKFFLNRPNSNKAMKILTYGEASVGFAPYSPLWVEMRKVTKSNLLSHQR  
VLMQNRSRASEIDASFKQLYEQCNGKSGASVEMKNWFEEVMLNVVTRNVSGKRSFGTKARLGDAEAVKYK  
RVIDETARFMGNLVISDMVPSLWLDNMLGAESAMKLAIELDSSLGGWVEEHRGKKLSDDEEGDFISLT  
WEMIDQIQHLGLAPETFIKSMCVGVLLGGSDTTSVALTWALSMLNREVLLKKAQEELDFHVGKDRKVDD  
SDLKNLVYLQAIMKETMRIYQVGPLIEREAVEDCEVGGFQIKKGNRILVNLWKLQRDPEVWSDPSEFRPE  
RFLDKSKVDLKGQNAELMPFGSGRRMCPGVWFGVHSTSLVLARLIQGFETPLDAKVDMTETSSVTNY  
KGSPLVIARLPGSNLSFMICSYV

>CCHCYP82-1

MTPSISQPFELLLLLMTMESLLLQWQPTSIAVLLLLAITIFLYTFTKSPPKTHKKLAPDATGGRPLMGHLH  
LFNSNELTHRTLGSMAADKYGPAFNIRFGSHKTLVVSTWEIVKECFTTNDRSFNSRPGTLYIKLMFYNEDS  
VGYAPYGAYWRDLRKLSTLKLSSNHRLESCLKHLRVSEMNECFKQLYEICNKGSKSVAVRMDNWFGLTFN  
VVARIVAGKRNFASISNDVGAMRYKNAMDEAFRLMTVFSFSDVIPSLGWLDNLRGLVGMKKAGKEIDSV  
VSGWIEEHREKRKRSSGGNNRDGELEEDFIDITLSILETSSLPGDDPDMTIKSTCLDMILGGSDTTTV  
TMTWALSLLLNNAHALKRAREELDLHVGRDRQVEDSDINNLVYIQAIKETMRLYPAGPLIERMTKEDCE  
VGGFHIPAGTRLLVNLWKMQRDPNVWEDPLEFRPERFLTNNAEIDLKGQHFELIPFGTGRRICPGVSFAL  
QLMHLALARLLHSFEVASPMDAKIDMTETAGLISHKVIPEVLMTPRLDKLYDY

>CCHCYP82-2

THTEKNLPPEVPGALPVIIGHLHKLGGKGLLPYHVLGAMADKYGPAFTFQFGSNRTLVISNWEMVKECF  
TSTNDKLFAYRPTALFNKEVFCSDHSFGFGPYGPFWREMRKVCSLHLLSNYRLELLKHSRKSEMDECFKE  
LYQLWSASNISKDKQPAVLVEMKKWFEDAMFNVASRVVVGKGLKSHEKAGGSDNEVARNKYKKGMDA  
RRHMGTFVISDRIPFLWIDYLRGIHSSMKRTAKDLHAIVETWLEEHRLHCHKRRVLQLDANHEVEDMAK  
EEEKDFMDVLLTMADEGAIKIFDHDLDTVIKANCLDMVIAGDTPTVMLTWTLSLLLNNPDVLRVRDEL  
DLHVGKERQVEESDVKNLVYLQAVFKETLRLYPAVPLNERLTMEDCNVGGYDIPAGTRLLINIWKVQRDP  
NVWQDPSEFRPERFLSKEKSTIDVRGLDFELIPFGTGRRMCPGISFSLQLMHLGLARLIHGFELATPMDL  
DVDMSANPGAFNYKSTDLQVLVSPRFHSHKFGYGC

>CCHCYP82-3

MDFLALQWFPASLTALLALAVLYNFWTKQRTYKNGKTSTKQAPVAAGAWPVLGHLHLFGGGELPHKMLAT  
MADKYGPAFTMKFGTHQTLVVSNTKIVKECFTTNDTLFANRPSTTAFHLMTYDNESVAFTPYGPFWREL  
KISTLKLSSNHRQLAIKDVRASEVNVCFRELYSQWRINKSEPETS DHQGPILVDMKKWFEEVSDNVVLRV  
IAGKQNFSGKIVHGDKEALHYKKIMDEILRLAAVSMLSDVAPLLGWLDMFQGHLSAMKRNAKEVDTMLCN  
WLEEHRTKRLSSDHGVEQDFIDVMSIVEENKFSGHDNDTVIKATVLAMIMGGDTTAVSLTWIVSLLM  
NNRHVLRRAQDEL DLHVGKDRQVDDSDLKNLVYLNAIVKETMRLYPLGALLERETKEDCEVGGFHVKGGT  
RLLVNVWKLQRDPDFWTDPTFEFKPERFLADKANIDVGGQHFELLPFGAGRRVCPGVSFALQFMHLVLARL

LHGFDLATPMNADVLDLTESTEGHVNQKASPLNLLVTPRLHSKLYEY

>CCHCYP82-4

MEYTFSSASLFSSSSSLQQWLSTLLLLISSITISLYLTRRGKSSPPMVPGAWPLIGHLHLLGGNDPLHIVL  
GTMADKYGHTFAMLFKHPVSLVSSSDIVKECFTSTNDKLFSHRHVPTGVKYMFYNNDSFGFAPYGPYWR  
EMRKMNSLSLFSHHRVEMLNRI RTSQINIWFKNLYEMCTKEKSTSTSSDGVVEMKSWFDEMFFNVLVNM  
IVKPINDDDEELVKKYREVATEAGRLLSSMAVSDMVP SLGWL DHLFGIVGKMKKTAKMDAILTTWLEQHK  
IKSQQLRRSNGGEGAADQTEEEEKEGKGLIGDLLSMQESALFGHDRD TVIKSACQALIMAGSDSTSATLT  
WVLSLLLNRDALRKAREELDQVVGKDRQVDDSDIKDLVYLQAILKETMRLYPAAPILERLAVEDCIVGG  
FHVQAGTTL FVNVSKLQRDPNLWTDPLEFKPERFLTGCNADV DLKGQDYELVPFGSGRRSCPAVSFAVRV  
MLLVLARFIHSFEVKTREEDGILDMTESSGHTNCRSSPLEVLISPRLDSKIYC

>CCHCYP82-5

MEYSSLPFLQQWPLSSSISSSPTSIAATLLIVACFTIVFLYINTSSKSNNNLKSPPKLPGAWPFMGHLHL  
LGGNQP AHVSLANIAEKYKSTPFMIRMGQHSTLVVSSVDLVKECFNNTNDKLF SNRSIARGIRDMFYDME  
SFGFAPYGYWRELKVSALTFSTHRVDSVIQIKTPQIDGWFKKLYEQCTNTKGGIVEIKSWLDEMMFD  
VLVKMLVEPKDEGSVEKYRHVAGEALEVLGNMSIYDLVPSL GWL DHFTGLVKKYKVTGKMDTILNSWLE  
DHRGEKVAEEHKGLIGKLLSMKEGSKLLGHDGDTAIKSTVQVILGAGDSAGATLTW AISLLL NHPHIME  
KLRKELDAAVGKDRQIEDSDVKKFTYLLAILKETMRLYPVTTLLQRETMEDCAIGGYHVAAGTRLMVNVW  
QVQRDPNAWSDPLEFKPERFLTECAHVDFSGQYSELIPFGTGRRICPAL TSVRLMLLTLARIHSFDVK  
IPNGASSVDMATSVGFVNLRLTLEVELSPRLDSKIYG

>CCHCYP82-6

MDSLLQWYTTASMAALLALAFFYKLWSKPRTSKNGKSTLQAPVAAGAWPVLGHLHLFSGGELPHKMLAA  
MADKYGPAFTMKFGTHRTL VVSDTKIVKECFTTNDTLFANRPSTMAFHLMTYDNESVAFTPYGQFWREL R  
KISTLKL LSNHRLQAIKDVRASEVNF C FRTL YNQWRINKSETIGTGDHQGPILVDMKKWFEEVSNNVVIR  
VIVGKHNFGSKIARGKGEALHYKKVMDEVLRLAAVSMLSDVAPLLGWF DHLQGHVSAMKRNAKEVDTL C  
SWMEEHRKKRTSNGSNGVEQDFIDVMLSIVEENKFSGHSDTVIKATV LAMIMGGTDTSAVSLTWIVSLL  
MNNRHVLRRAQEELDTHVGKDRQVDDSDLKNLVYLNAIVKETMRLYPLGALLERETKEDCEVGGFHVKAG  
TRLLVNVWKLQRDPNFWIDPTEFKPERFLTDNANIDVGGQHFELL PFGAGRRVCPGVSFALQFMHLVLAR  
LIHGFE LDTPMNANVDMTESTEGHVNHKASALDLLITPRLRSTLYDY

>CCHCYP82-7

MFKSVPSAQAILHKLSFIHQYFLLSQTNMDSLLFQWFPASMAALVAFALYKLWSAPKITKNGKTSTKQA  
PIAAGAWPVLGHLHLFGGGELPHKMLAGMAEKYGPAFTMKFGMHR TLVVS DTKIVKECFTTHDTL FANRP  
STTAFHLMTYDQESVAFTPYGPFWREL RKISTLKL LSNHRLQAIKDVRTSEVNVCFRGLYNIWQTNKNEQ  
GGTVSDHPRPVLIDMKKWFEEVSNNVVIRVIAGKQNFSGSKIVRGEEEA VKYKKIMDEVLR LAAVSMLSDV  
APLLGWLDFQGNLSAMKRNAKEVDNMLNAWVEEHRKRLAHS AKVEATHVEQDFVDVMLSIMEENKLS S  
VHDDDTV I KATV LAMIMGGTDTTAVSLTWTVSLLMNHRYVLKKAQEEIDQHV GKERQVEDSDLKNLVYLN  
AIVKETM RMYPLGALLERETKEDCEVGGFHVKGGTRLLVNVWKLQRDPNVWIDPTEFKPERFLAENANID  
VGGQHFELL PFGAGRRVCPGVSFALQFMHLVLARLIHGFELETPMNADV DLTESTEGHVNHKASPLDLLI  
APRLNSKLYEL

>CCHCYP82-8

MDSL FVLLQWFSASLA AVLALAFLYNLVWKPRI SDGKGNKGSTKQAPVAAGAWPVLGHLHLFGGSELPHK  
MLAAMADKYGPAFTMKFGTHRTL VVSNTQIVKECFTTNDTHFSNRPSTTAFHLMTYDNDSVAFTPYGPFW  
REL RKISTLKL LSNHRLQAIKDVRVSEVNVCFKDL YNQWKTNQNR PVLVDMKKWFEEVSNNVVIRVIVG  
KQNFSGSKIVRGEEEA VKYKKIMDEILRLAAVPMLSDMAPLLGWLDFQAHKSAMKRNAKEVDNMLESWLE  
EHKRKRLSGVNGAEEEDFMDVMLSIMEENKFTGRDSNTVVKSTVLAMIMGGTDTTAVSLTWIFSLLMNMR  
HALKKAQEEELDMHVGKDRQVEDSDLKNLVYLNAIVKETM RMYPLGALLERETKEDCEVGGYHVRAGTRLL  
VNVWKLQRDP SFWTD PTEFKPERFLTENAKTDVGGQHFELL PFGAGRRVCPGVSFALQFMHLVIARLIHG  
FELGTPMDADV DLTESTEGHVNHKATPLDLLIAPRLDSKVYDY

>CMACYP82-1

MRSNYLKPTTTTIEDKSKNKISRKKPIAAKPPPEALGAWPVIGHFLLFTGKGLTHVTLGDMADKYGPAFL  
IRFGSHRTL VVSSWEMMKECF SAPNDKIFSNRESNLLWIKSMFYGSNSYGFSPYGPYWKELRKISTQKLL



SHHRLDAMKHLQMVVDASFKQIYNLCNKNGGSPSPSSINTTALVNMDEWLSHLMFNVIARMVSGYQSD  
VGTGATSTGERFKVSMDETMRLMAIFAVSDLVPWLACVDRLRGLTRKMNRCGKDLDSIIGRLIEEHRQKR  
RLCRNNKGSKNEDGGHDDQDFIDICLSIMEQSQLPGDNPEIAIKSIVLDMIFAGSHTTTLAMTWLTSLL  
LNHRHMLKKAKEEIDAHVGNRQVDDSDIHNLVYIQAIIKESMRLYPPSPLFERMTMEDCEVGGFHIPAG  
TRLFVNVWKMQRDPTVWEDPLEFRPERFLTSKREIDVKQHYELIPFGAGRRICPGASFTLQVLHLVLAR  
LIHGFEMTTPMDVKVDMASAGLFSNKMTPLEVLITPRTA

>CMACYP82-2

MKILQEFHQLTISNIVLLLLISFIFFSLSAWFIESTNYYYYSSKKKKSKKTPPEASGAWPVIHGLHQFKP  
DDLPHALGDMADKYGPVFIIVRFGSYRKLVSNSSEMVKECFTAANDRSFSNRPAVLGIRIMLYNTITYAF  
APYGPYWRELRRISSQNLSSNHRVDMVKHLHVDEVNTLFKQLYELCNKNGGRPPTGTNTSTSAALVNMDD  
WLSNIMFNVIARIVNGNKSINNERTGAINEKRYKTAMDEARRLVAIFAVSDSVPWLGWLDVRGLIRGM  
NLCGKELDSIIEDIIDEHRQKRRLCTSKLGSSGDDADNSNLEEEDNFIDACLSIEEQSQLPGENPEIVI  
KALILDMFAGGSDGPHFVLTWTLALLLNHPHVLKAREEVDAHVANDRHVDVSDISNLVYIQAILKESMR  
LYPPNALIERMTTEDCEVGGYHIPAGTYLLVNVWVKVQRDPTVWQDPSEFRPERFLTNTKTEMEYEHIPF  
GAGRRRCPGMRFALQVMHLVLARLIHEFEITTPVDVIKVDMTATNGLFNHKAVPLEVLLTPRTLIRG

>CMACYP82-3

MDYSVLLQYGFAPSMALLALAFLYNLFLASSPKATSKRTISTKKPPMAAGAWPILGHLHLFKEGELPH  
QMLKSMADKYGPAFLMKFGQHRSLVSDYRIVKECFTTNDTHFCNRPSTTAFDVMTYANESVAFTEYSPY  
WRELKISTLKLSSNRLQAIKNLREEEVNVSFKGLYDSWKNKNKSTGSVGDERAPVLVDMKKWFEEVS  
NNVVIRVIVGKCNFGTKIVQGEKEGVEYKTIMDELLRLASLSLLSDFAPILGLLDFQGHVRTMKRNGKK  
LDVLLQRWLEEHRKKSTPEDEQDFMDVMSVIEESKLSGYDADTVIKATCLAMIMGGTDTSAVSLTWIV  
SLLMNRHALKKAREELDAQVGKDRQVEDSDLKNLVYLNAIVKETMRLYPLGTLLERETKEDECEVGGFHL  
EGGTRLLVNVWVQRDPSVWTDPTKFTPERFLTEKADIDVWGGNFELIPFGAGRRVCPGVSFALQFLNLV  
LARLIHGYELGTPDDADVDLTESPEGLNHKASPLELLTPRLSNPKLYDY

>CMACYP82-4

MEFLSLEPQLISIFVLLASSIFLYNLLKNHGRKSKTSKPPAPVASGGWPIMGHLHLFNGSELTHQTLGS  
MADKYGPAFNIQLGSHQTLVSSWEIVKECFTTNDRFFSNRPGSLAIKLMFYDADSVGYAPYGAYWRDLR  
KISTLKLSSNHRVETLKHRLTSEAESCQKLYNQWKNKVGDDDEFAIVRMDNWFGLTFNVVARIIVAG  
KKNFAGGATSGDVGAKRYKEAMDEAFRLMTIFAFSDVPSLWGLDKLRGLVGGMKRCGAEIDSIVGGWVD  
EHRLKRASRGGDHNDLDLEQDFIDVCLEIMEHSTLPGDDPEIVIKSTCLDMILGGSDTTTTLTWALS  
LLNPHVVKRAREELDTHVGKDRQVDDSDMSNLVYIQAIKETMRLYPAGPLIERRTSEDCEVSGFHVPA  
GTRLMVNLWKMQRDGSVYKEDPLEFRPERFLTSNADVDLKGQNYELIPFGAGRRICPGVSFAVQLMHLVL  
ARLVHGFEMKTAGGAKVDMTESAGLISHKVTPQLVLLKPRLAIQQAL

>CMACYP82-5

MDSMNLFQQAIAVGTLVIFLYYLWKWTSIIFTRTHQAAPPEPAGAWPIIGHLHLLAGGANQLVYHILGSM  
ADKYGPIFTVRLGMRRALIVSNSELAKECFTTNDRIFSTRPSSVAIKLMGYDSAMFGFAPYGPYWRMRK  
IAVTELLSNRRLEILKNIRISEINMSIKDLYQLWVENKNSGVDGGGDDGGEVVVGVSPVLVEMKRWFEDVSF  
NVVVRMVAGKRYFGRRVESDDREEEARRWQKAMNDFMHLVGIFFVSDAIPFLGFLDFQGYEKEMKKTAV  
EIDYVMGRWVEEHQRRKLERVAGGSDDQEDFIDVMSILKGDGQFYGYDPTVIKSSCLSLVLGGSDTI  
SVTLTWTVSLLLNRRNVLEKAQSELDIHVGRGRQVDESINNLKYLQAIIVKETMRLYPAGPLSAPREAME  
DCTIAGFHVPKGTQLMLNLWKLHRDPRVWSDPLEFKPERFLTGTGHDVDVKGQHFELLPFGAGRRICPG  
ISYALQVLHLTLARLLHSFHLSTPYDIPVDMTESSGLSCPATPLDVLLTPRLPSELYVS

>CMACYP82-6

MDLFIFFSRFYIVGLLAFLTFFYYLWRVSIITGTRIKTNQIMNGTNMMAPEAAGAWPIVGHLPQLVGPQ  
PLFKILGDMADKYGSI FMVRFGMHPTLVVSSWEMAKECFTTNDKFLASRPTSAGGKYLTYDFAMFGFSFY  
GPYWREIRKISTLELLSHRRVELLKHVPYTEIGGSIKQLYKLMETQNKQKQRDDHQVKVDMQSQVFGYLT  
LNTVLKLVVGKGLFNNNDMNHEQEGRKLHETVLEFFKLAGVSVASDALPFLGWLVDVGQKRSMKRIAKE  
MDLIAERWLQEHRQKRLTSNNKASSGHDDFMSVLLSILDDSNFFNYNRDVIKATSLNLILAASDTTTSV  
SLTWVLSLLVTNPGALKKVQDELDTKVGRNRHVEERDIEKLVYLQATVKETLRMPYAGPLSVPHEATQDC  
TVGGYQVTAGTRLVNVWVKLQRDPRVWPNPSEFKPERFLPDGCEVGCGEANMDFRGQHFYIPFGSGRR

MCPGIDFAIQIIHMTLACLLHAFEFQVPSSLDKHLVPAVIDMSEGSGLTMPKVTPLEVLLNPRLPLPLYE  
L

>CMUCYP82-1

MEAMGEYFQLISWTVFSALITIIYFIFSRKTNGKKKAPEPGGAWPIIGHLHLFGAHDLLYRKLGMADKLG  
PVFMIRFGMHRVVVSNYEVAKECFTVNDKILASRPRIASKLMGYNHAAVGLSPYGPYWREARKIATLE  
LLSNHRLQLLKHRISEIDMWIKELKEFCMKSSSDGPVLVQLDGFNALTINIMVRNIAGKRYCGGAEAF  
EDEESQRWKKVSRELMFLFGVFMVPAFPVLEIDVQGFERAMKRVGKEMDFFLSRWLEEHRRKKIELSE  
KNEVNDQGAQDFIDVMLNTIKDAKIFEHDADTMIKATCMALVVAGNDTTMITLSWAVSLLLNNRGVLEK  
AQEELSNQIGKNRHVEEGDIESLPYLHAIVKETFRLYPAAPLSLPHEAMEDCTIAGFHVPAGTRLITNIW  
KLHKDPNIWPDPLEFKPERFLTTHAHVDFKQHFEPFPGSGRRMCPGSSLAISVLHLTLARLLHEFELK  
TPDDAPVDMTEGPGITLMRANPLHVLINPRHD

>CMUCYP82-2

MSSPIQQLLSLTSINGGTIISAVIISLLLILTLHRLKPINSNKTKHPPRASGAWPVMGHLHKLKRGPD  
PHRTLSSMADQYGIPTINLGPPTALVISDPAVAKECFTTNDLTFSSRPTTLATTLMCYNNTMFGFAPYG  
PYWREVRKVVMAQLLSTRRELSKNIWASEIDRWVKGLAQKAQSGSHGVVEVEMGDWLARLTMNIIGLRLV  
VGKSCGEMGSEESERCLGAMREYPELLGRFALEDALPWLGRFDLQGHQREMRRARVLDIILDGWLDEHK  
RNRSLSGGDDHRDQDFMDVMLSVLEQDQDSSLSDHADMIKSTCLNLILGMADTTMVALTWAISLLLN  
NKTSLKKAQEELQAQVGNRHVDES DVKNLVYLQSIIEKVLRLYPPEPLSGPREALEDCEVAGYHVPRGT  
RLIANLWKIHRDSSTWQDSMEFRPERFLTAHEHVDVWGQHFEMPFGSGRRSCPGVSFEVRVLPILARL  
IHAFEMTTRGDVPVDMSERPGLVISKASPLEVMISPRLPLHLFE

>CMUCYP82-3

MEFHLLQAVAATLVTFFLYELWALRKKFSRLTKTPSSKALLKAKCAPEPPGAWPIIGHLPLLVSAKQPH  
RAFAALAKEYGPAFMLRMGMSPLIVSTKEVAKECYTANDHVAFTRPVTTAGKLMAYDHSVGMFTFPFGTY  
WREIRKIATVELFSARRIGMLKPVQRQSEVSLWMKGLHEKWVHNGNSSVSVELKSQLEELTFNLLTQMVAG  
KRYYGNSVAKVDEKMAGLFRHAVQQFNHYHLGNSEMYDALPFMAWLDKGDAMKKTQKDLDFIMQWLD  
EHRLKADQMRGDAINNRDFLDVLVMEKGTGFSSAIKDRDRTTIKALATQLVAGVDSMANTMVVWVALL  
MNNPEMLAKAQDELDNNVGKDRLEVESDIPNLKYLQALLKETLRMYPVGPPLLVPEATEDCHVAGYFVPR  
GTGLFINAWTIQRDPNVWAEPNCFNPERFLTTHAEMDVKGQNHLLPFGSGRRSCPGVGLALQVMHLTLA  
RILQAFELKTQSGVGIDLEECGILLSMMHPLQVMMAPRLPSELYD

>ECACYP82-1

MDSLILTWNFPISIASVLTFLVFLYKVLSSRTLKDKKIKTSPMANGAWPILGHLHLFGSGELPHKMLATM  
ADKYGSAFRMFKGHTTLVVS DTRIVKECFTTNDTLFSNRPSTKAFQLMTYDNESVAFTPYGPYWRELK  
ISTLKLLSNHRLQAIKDVRASEVNVCFKSLYDQCKNPSGAPILIDMKKWFEEVSNVVMRIVIGRQNFSG  
KIVQGEETAIHYKKVMDLRLASLSMFSDFAPLLGFLDIFQGNLSAMKQNAKKVDAILENWL EHRKKK  
NSVAESEQDFMDVMSIANESKLSGHDADTVIKATCLAMIMGGTDTTAVSLTWIISLLMNNRHALKKARE  
ELDALVGKDRQVEDSDLKNLVYMNAIVKETMRMYPLGTLLERDTKEDCEIGGFHVKGGRLLVNVWKLQR  
DPNVWVDPTEFRPERFLTENADIDVGGQHFELLPFGAGRRVCPGVSFALQFMHLVLARLIHGIDLNTLNE  
ENVDLTESPEGHVNHKASPLDLILTPRLHYKLYE

>ECACYP82-2

MDTASSISLLL PWAVVPSIATLLALLLFLFITSPKTPKRKTSSKPPPTVLPGAWPILGHLHLFKEGES  
HHMLKNLADKYGPAFVMKFGQHRSLVVSNTKIVKECFTTNDTLFSNRPSTTAFDLMTYAHDSVAFTPYSP  
YWRELKISTLKLLSNNRLKAIKKLRGEEVDVCFRGLYGLWKNKTKNGAPVLVDMKKWFEEVANNVVIRV  
IVGKLSFGTKIVDGEETAVEYKTVMDLRLASLSLLSDMAPILGWLDFFQGSVRKMKQTGKRLDVLEK  
WLGEHREKKNLVGEDEQDFMDVMSIVEESKLSGHEADAVIKATCLAMIMGGTDTTAVTLTWIISLLMNN  
RHAEKAREELETHVGKDRQVEDTDLQNLVYLSAIVKETMRMYPLGTLLERETKEDCEVGGFHIQGGTRL  
LVNIWMVQRDPTVWNDPSAFKPERFLTDKSEIDVGGQHFELIPFGAGRRVCPAVSFALQFLHLVLARLIH  
GYDLGTPSNVEVDL TESLEGHVNHKASPLELLLTPRLNPKLY

>ECACYP82-3

MESEIQYQTATMASILSTNLILSSIFTAFLLYFLLKMSPFSSKNKSRKQAPKPTGSWPIIGHLLHLQGP  
NLPHINLAALADKYGSVFSFRIGLRPALVVSSWEIAKECLTTNDRVFSRPLIAMKHMGYDHALFGFSP

YGPYWRELRLKLVNQELLSNTRIELIKHVWDEINTFINDLYEVWAMKSNEGGGDVVVEMKQCLYDFTLNL  
TLKILT GKRYFGGGSEELREEAGRCQKAVRNFLRLVGTFTAQDVIPFLEGWLDLGGHEKEMKITGKELD  
SLLQKWLEEHKVKKSSAGEEGQENRGGDEEDFMGVMLTKLRDHEKLLSYDADTINKATCLTVILGSDT  
TMMTLVWALALLVNHPVMKKLQDELDTVSKERQVEESDIKNLAYLQSVMKETMRRYPGTPLYVRESIE  
DCTIAGYDVPTGTRLVVNAWKIQHDPQVWSNPFENPERFLTTHKIDVIRGQNFELIPFGAGRRMCPGAS  
LGLQVVHLTLARLVHGFEEKTPDGEPMDMTESIGLTNLKATPLEIMLTPRLSSKLYVC

>ECACYP82-4

MGLSFDLSSHNFLOFSNPTILIGLFGLLVYLLLVNLRKRISRKNEAPEVEGGWPIIGHLHHFMGGKKNLL  
HVAFGAWADKYGPVYTLRMGLNKVLVNSAEVAKECSTTNDMLFMARPYRIASEIMGYGYAMFPIAPYGP  
FYLKMRKMTQELLSNSRVDSLKHVWGSEIKNAIQELHKKVLSTKGGGPIISMMDKGVSNLTFRTAMKVI  
CGGVGVDGGGGGGGATSPATSIGEHNYDEVG SFQKALKEFFVLLGEIRISDVIPFLGWLD MRTGYVEKMK  
DNGKFLDNLMEEMLEEHKRKRSLTEEEKDG GYVEQDFMDVMISKLNPKLLSYDADTINKSTCLTLI  
LSGSETTMVSIVWALALLVSHPHVLKKAQDELDTLVGRERQVDESDIKDLVYLQAVVKEALRFPAPLS  
TPRVATEDCVVSGYHVPAGTQLFVNTWKIQRNPEVWPESEFRPERFFTTHKDFDVRGLHYDLHPFGSGR  
RACPGAGFALQVVHLTLASLLHGFEIKNPSDEPIDMTESPGVTNL KATPLKVLLTPRLFSKEY

>ECACYP82-5

MEKPILLQLQPGILGLLALMCFLYYVIKVS LSTRNCNQLVRHPPEAAGSWPIVGHLPQLVGS GKPLFRVL  
GDMADKFGPIFMVRFVHPTLVVSSWEMAKECFTSNDKFLASRPPSAASIY MAYDHAMLGSSYGPYWRE  
IRKISTLHLLSHRRELELLKHVPHLEIHNFIKGLYGIWKDHQKQQQPTARDDQDSVMLEMSQLFGYLT LN  
IVLSLVVGKRCVNYHADGHLDDGEEAGQGQLHQTITDFFKLSGVS VASDALPFLGLFDLDGQKIMKRV  
AKEMDFVAERWLQDKKSSLLLSSKSNNKQNEAGEGDVDDFMDVLMSTLPDDDDSF TKYSRDTVIKANS L  
SMVVAGSDTTSVSLTWALSLLLNNIQVLRKAQDELDTKVGDRHVEEKDIDNLVYLQAI VKETLRMPYAG  
PLSVPHEAIEDCNVGGYHIKTGTRLLVNIWKLQRDPRVWSNPSEFRPERFLDNQSN GTLLDFRGQHF EYI  
PFGSGRRMCPGVNLATPILHMTLARLLQSFDL TTPSSSPVDMTEGSGL TMPKV TPLKVLLTPRLPLPLYD  
Y

>ECACYP82-6

MNLSSKLMGSFDL FSLNFLQFSKPASMVIIGIC SFLVYFSLNLVRRVLAPSCTMKN GKTEPPEVENGWP  
IIGHLHHFMGKKNKLIHEIFGDMADKYGPTFTLRMGLTKVLVSSAEVAKECLTTNDLVF IGRPPRVANS  
LLGYSFAMFPFSPYGTYYQMRKIVTHELLSTSRVESLKHVWNSEINKAIQELH HKVSVGGGSPV LIEF  
KRWFSDLTLRTTVKLCIGKQYFGTDGATQASMTINGGGDDDEAGKFQ EALREFFCLLGKFRVSDVIPFLG  
WLDFTGTGYKEKKNRMFIDSLMEEWLEEHKMKRRLLINEADK KESRIEQDFMDVMISKLDDPNLLSHYDADT  
INKATCLTLILGSDTTMVSLVWALTLLMNHPHVLKKVQDELDFHVGRERQVEESDMKNLVYLHAVMKEA  
MRLNPAGTLSAPRMSTKDCTVSGYHIPAGTHLFMNTWKIQRDPNAWVEPTEFRPERFLTTHKDFDLRGQ N  
FELLPFGSGRRSCLGANFALQVLRQTLARLLHGFDLKTPSDEPVDMTGSAGLINMKATPLEVLVTPRLFS  
SELYG

>ECACYP82-7

MNLLIFFQFLLQFQVLVGLSVLLAFSYLWVSKNPKINKFKGKGALLAPQAAGAWPIVGHLPQLVGP KPL  
FRILGAMADNYGPIFMLRFGVHPTVVVSSWEMTK ECFTTNDRH LASRPSNAASQYLIYEVYALFGFSLYG  
SSYWRDARKIATLELLSHRRELELLKHVPYTEIDTCIKQLHRLWTKNNKNQNNPELKVEMNQFFDTLTMNV  
ILKLVVGKRFNFVDDAADHEKEEARKIQGTIFEFFKLTEGVS SAGALPLLNWLDLNGQKRAMKRTAKKMD  
SIAEKLLDEHRQKRLSKEGVKGT HDHNDFMDVLLSILDADQGDYSHHPFNYSRDHVIKATTL SMILSSMS  
ISVLSWALSLLLNNRHVLKKAQDELDMNVGKDRQVEEGDIKNLVYLQAI VKETFRMPYANPLLLPHEAI  
EDCKIGGFNVPAGTRVVVNAWKLQHDPRVWSNPSEFKPERFLNDQAAKVV DVRGQNF EYLPFGSGRRVCP  
GISFSLQTIHMSLARLVQAFELGTPSNERIDMTEGSGL TMPKTTPLHVLLNPR LPLPLYE

>ECACYP82-8

MEFHFPMEQFPFFIFALLLASFIFLYKLFNFGNRITKNGKPTAPEASGGRLIMGHLHLFNGTELT HRT  
LGSMADKYGPAFNIRFGSHKTLVSSWKIIECF TTNDRFFSNRPGSLAIKLMFYDADSVGYAPYGSYWR  
ELRKISTLKL SNHRETLKHLRTSEVDSCFNQLMNSWAENKNRGDSDFAPVRMDDWFGDLTFNVVARIV  
AGKKNFAGGAARGDAGAQRYSAMDEAFRLMTIFAYS DVIPSLGWLDKLRGLVGMKRCGSEIDSVVESW  
VDEHRLKRRVSKGGELDLEQDFIDVCLDIMEHSSLP GDDPEIVIKSTCLDMILGSDTTTTVTLTWALS L

LLNHPQVLKRAKEELDSQVGKERQVEDSDIPNLPLIQAIKETMRLYPAGPLIERRTMEDCEVAGFHVPA  
GTRLLVNLWKMQRDKEVWSEEPLEFRPERFLTSNTEVDLKGQHYELIPFGAGRRIICPGVSFAVQLMHLVL  
ARLLHGFEMTTMGEKVDMTESAGLISHKITPLEVLKPLRV

>ECACYP82-9

MDSFLLAYWVPISVASIIAFVFLYNLFSSRTLQNKKIRTAPMATGAWPILGHLHLFGSGELPHKMLAAMA  
DKYGSAFRMKFGKHTTLVVS DTRIVKECFTTNDTLFSNRPSTKAFQLMTYDNESVAFTPYGPYWREIRKI  
STLKLLSNHRLQAIKDVRASEVNVCFKTYDQCKNPSGSAPILIDMKKWFEEVSNNVVMRVIVGRQNFSG  
KIVQGEAAIHYKKVMDLRLASLSMFSDFAPLLGFVDIFQGNLSAMKRNAKKVDAILENWL EHRKKK  
NSVAESQQDFMDVMSIVEESKLSGHDADAVIKATCLAMIMGGTDTTAVSLTWIISLLMNNRHAKKARE  
ELDALVGKDRQVEDSDLKNLVYMNNAIVKETMRYPLGTLLERETKEDEIDGFHVKGGTRLLVNVWKLQR  
DPNVWVDPTEFRPERFLTENADIDVGGQHFELLPGAGRRCVCPGVSFALQLHAFSTCSPHPWIRFEYSKR  
RKCGSDGEPRTCEPQSIAS

>GFLCYP82-1

MEFLSLQLQPVSIFALLVASIFLYNFLIHGKKSNNKTTKPPAPEASGGWPIMGHLHLFNENELTHRTL  
SMADKYGPAFNIRFGSHPTLVVSSWDIVKECFTTNDRFFSNRPGSLAIKLMFYDADSVGYAPYGAYWRDL  
RKISTLKLLSNHRL ETLKHLRTSEVESCFKELYNQWRNNKTGGGGDGFAPVRMDNWFGLTFNVVARIVA  
GKKNFAGGAASGDAGAQRKEAMDEAFRLMTIFAFSDVVPALGWLDKLRGLVGGMKRCGAEIDSIVAGWV  
DEHRLKRSSGKGSADLEQDFIDVCLIMEHSTLPGDDPEVVIKSTCLDMILGGSDTTTTLTWALSLLL  
NNPHVLKRAREELDTNVGKDRQVDDSDIPNLVYIQAIKETMRLYPAGPLIERRTSEDCVGGFHVPA  
RLLVNLWKMQRDGSVYKEDPLEFSPERFLTSNADVDLKGQNYELIPFGAGRRIICPGVSFAVQLMHLVLAR  
LIHGFEMKTPEGKVDMTESAGLISHKVTPLEVLLKPRLAIQHS

>GFLCYP82-2

MHAKLTLIKMEFTIINSLEIQPIISTFALLTFSILLYKILLNHGRENKNNKPKTSSSSSSIPEVAGAWP  
IMGHLHLFNGDELMHHLGSM AEKYQAFYIRFGSHKAVVSNWEMVKTCFTTNNQIFLNRPPMLAINLL  
FFPTDSL SYIPYGDHWREL RKF SNQKLLSNHRIETQKNLRKLEVDYCFKQLCNQSSKYFIINNMDQDQSK  
FALVRMDTWFDVTLNVLARI IAGKKKFISSGATSSGDDDAEARRYMEALDEGLRLMSTFTFSDVLPWL  
GWL DNL RGLAGMKRCGAELDSVFAGWVEHRV KRGRSRKDGDDADLEQDFIDL CWESLEQVPGNDPAKII  
KLICMEMILNGSGATAVTLTWTVSLLLNPNPDLKRAREELDTHVGS HRQVDES DIPNLVYIQAIKEGMR  
LYPPGPFLERSTTEDFEIDGVHPAGTRLWVNLWKMHRDESMYQEPLEFKPERFLNSNSVDLKGQSYQL  
LPFGAGRRIICPGVSFALPLMHLTLARLIHGFEMKLPVGVKVDMTENGGIINR KATHLDVLLKPRLIAQQ

A

>GFLCYP82-3

MDTLSIQWIVPSIATLLALVFLYNLIFTSKTTKTNNTRKAPMASGAWPVLGHLHLFGTGELPHKMLATM  
AENYGTAF TMKFGNHTTLVVS DTRIVKECFTTNDTLFANRPSTKAFDLMTYANDSVAFTPYSPYWRELK  
ISTLKLLSNHRLQSIKDVRAEVNVCFRGLHVLCKSKIYGAPVLVDMKKWFEEVSNNIVMRVIVGKQNF  
SRIVQGEAEAVVYKSVMDLRLASVSVLSDFAPLFGWLDFFQGNISAMKRNGKLDVILERWMEHRQK  
KISSSSSIAASGAGEDDEQDFMDVMSII EETKLSGRDADTVIKATCLAMIMGGTDTTAVSLTWIVSLLM  
NNRHVLKKAREELDSL VGKDRQVEDSDLKNFVYMNNAIVKETMRLYPFGALLERDTKEDCEVGGFHV EAGT  
RLLVNVWKLQRDPNVWKP DPLEFRPERFLVENVDIDVGGQHFELLPGAGRRCVCPGVSFALQFMHLVLARL  
IHGYELETNGEDVDLTESTEGHVNHKASPLDLLITPRLDSKVYNY

>GFLCYP82-4

MDSTLVLQCFVGSMAAVSALVFLYNLIFSSSKTTKGKVLKAPMAAGAWPILGHLHLFGSGELPHKMLSK  
MAEKYGAFTLKF GKHTTLVVS DTRVVKECFTTNDTLFANRPSTTAFDLMTYANDSVAFTPYSPYWRELK  
KISTLKLLSNHRLQSIKEIRVSEVNVCFRELFEMSKSKTDGAAPALVDMKKWFEEVSNNIVMRVIVGRQ  
FGSKIVQGDAAVNYKNVMDLRLASLSMLSDFAPLLGWVDMFQGNKNAMKRNAKKVDTILEGWLEEHR  
KKNKMSSENDEQDFMDVMSII EETKLSGRDADTVIKATV LAMIMGGTDTTAVSLTWIVSLLMNNRHV  
LKKAREEIDAIVGKDRQVEDSDLKNFVYMNNAIVKETMRLYP LGLAMLERDTKEDCEVGGFQVQAGTRLLVN  
VWKLQRDPNVWSDPSEFRPERFLSENADIDVGGQHFELLPGAGRRCVPRVSFALQFMHLVLARLIHGYE  
LGTQNDLVDLTESTEGHVNHMASPLDLLITPRLSNPKLYDY

>GFLCYP82-5

MFFTSSSKTTNKNTSKKPPMAPGAWPILGHLHLFKEGELPHHMLKSMADKYGPAFLMKFGQHRSLVVSDY  
RIVKECFTTNDTLFSNRPSTTAFVMTYATDSVAFTEYSPYWRELKISTLKLSSNNRLQAICKLRESEV  
NVCFRGLYDSWRKNKSEQNGAGNSIDGGNERARPVLDMMKKWFEEVSNLVMRVIVGKRNFGTKIVEGK  
EAVEYKTIMDELLRLASLSLLSDFAPILRFLDFHFQGHIRTMKRNGKLDVLLQRWLEEHRRKMSTPEEQ  
DFMDVMSIVDESKLSGHDADTVIKATCLAMIMGGTDTSAVSLTWIVSLLMNNRHALAKAREELDKHVKG  
DRQVEESDLKNLVYLHAIVKETMRLYPLGPLLERETKQDCEVGGFDIAGGTRILVNIWMVQRDPVWVWDA  
TEFIPERFLTEKSDVDVWGGSFELIPFGAGRRVCPGVSFALQFLHLVLRARLIHGYELKTPNDMPVDLTS  
TEGHVNHKASPLDLLLVPRLSDLKLYDY

>GFLCYP82-6

MDSILTTVVLLSILLYFLFSWQLNKYSATKKNTKSSKQLPPEPAGSWPVIGHLHLLAKGSNLPHINLGM  
ADKYGPIFMIRIGLNP TLVVSSWEVAREIFTTNDQVFSSRPIQVSTKHLGFDTAMYGFAPYGPYWREISK  
LVKREVLNTRLEFLKPVWGSEINTSIKELYDVCVMKNKEEGGTGPIIVEMKQWFSDLALNMSVKLVAGK  
RYFGASQLGNEEAARWQKALRNCFRVLVGLFVVS DAIPFLRWLDVGGHEKEMKNTAKELDDLLEGWLEEHK  
MKKKSLSSEVEAEKKERDRVDFMDVMLSTLEHEKASDYFPADTINKATCLALILGGTDTTTVVVWVWALAL  
LVNNPNVLKKAQDEL DVHVGGKRRQVDES DIKNLTYLQAIKESMRLYPAATLGIRESTEDCTVAGYHIPA  
GTSLIVNSWKIQHDPQVWTDPF EFQPERFLTGHMDVDIRGQCKFLPFGSGRRSCPGTSLALQMVTLTLA  
RLIHGF EFRTPEAPTDMTESAGL TNVKATPLEVLVSPRLPSELYVC

>GFLCYP82-7

MELINSLEIQPITISILALLTVSILLYKIIWNHGSRKNNKSNKNRKTSSSAGVVEIPGAWPIIGHLHLF  
NGSEQMFHKLGLSADQYGPAPFFIRFGSRKYVVVSNWELVKTCFTAQSQIFVSRPMLAMNILFFPKDSL  
SYIQHGDHWRELKISSTKLLSSHRVETQKHLIASEVDYCFKQLYKLSNNGEFTLVRLNTWCEDMALNVH  
VRMIAGMKNYVAAPGSGEYGGQARRYRKALEEALDLNQTITDVPWLGWLDHFRDVGGRMKRCGAELD  
SIFATWVEEHRVKRASGKGGDVEPDFIDLWESMEQLPGNDPATVIKLMCKEHI FNGSGTSSLTLAWILS  
LIMNPNYVIKKAREELEKHVGNHRQVEESDLPNLLYIQAIKEGMRLYTPGPFIDRNTTEDYEINGVHIP  
AGTCLYVNLWKIHRDPNVYEDPLEFKPERFLKNNSDL DLKGQNYQLLPFGAGRRICPGVSLALPLMYLTV  
SRLIHGFDMKLPKGVEKADMTAHGGVINQRAYPLEVLLKPRLTFQQA

>GFLCYP82-8

MDLQIFFHFQGIVGSLALLSFFYYLWRLTTTTKTSICNGTTAAPPEVSGGWPILGHLLQLVGSKQPLFKV  
LGDMDADKYGPIFVVRFGMYPTLVVSSWEMAKECFSTNDRVLATRPTSAASKYLTNYAMFAFTFYGPYWR  
EIRKISTIELLSHRRVEMFKHVPFMEIDTCIEQLYLLWMQNQNQNQNQPNQDPVQVNMSKVFEELTMNAV  
LKL VVGKRLTDDKEGKHLKTIQEFFKLEVSVASDVFPFLGWLDVDGQKRKMKRVAKEMDIIAEKWLEE  
HRQKRSSKLEEEEEEDDGGGKGDAAAADKDFMDVLLSLLLEGDEGSDQPFMNSRDTVIKATSLNILV  
AATDTTSPTLTWAI SLLLNNPHVLREAQNELDMKVGRDRQVEEQDIENLIYLQAIVKETLRLYPAGPLSI  
PHEAIQDCKLGGYHVRAGTRLLLNIIWKLHRDPRVWSNPLEFKPERFLILSEEVCGRGTQNFDFKGQCF  
EYIPFGSGRRMCPGYNFGIQI IHMTLARLLQS FEMQPAKAKSLNDQDGPVDMREGSGLTLPKITPLKVLL  
TPRLYGQLYNH

>HCACYP82-1

MDFSMLFQWLLVTMATLLFLNSVYNVWYKSSKNTSITTTTTSKGKKAPVAAGARPFMGHLHMLVGGKQLPH  
QALGKLADIYGPAFIIHIGPNPELVSSWELAKECFTTNDKYFANRPTNKAMKYLT YDEASVGFPGYGPL  
WVEMRKIAKSNLLSQORLQMHKRVRLVLEIDAFFKELHELWSMKKEDGPVSDMKQWFEELTLNVITRMVS  
GKHKYATKARRGDSEAKQFKRVIGEAAHFTGNLLLSDFPSLGF LDNMQGRVNSMKRTGKELDSILSSWV  
EEHRQKKLSGEQSEDEEKDFIDLTL SMMDEIQLHSTDSETFIKAI CVGVILGGS DTT SVGITWILSLLMN  
HRDVLKKAQEELDQVGM DRKVEDS DLNLLVYLRAIVKESMRLYQVGPLIERKASQDCTIGGFHV KAGTR  
LLVNL SKVHKDPTVWSDPLEFQPERFLTTHSNMDLKGQHFELLPFGSGRRMCPGYLFALNEMYLVLARLI  
QGFELGTPMDAKVDMTETSSVTNYRATPLQVLLTPRLSPKLYDY

>HCACYP82-2

MAFVALIVVYNIWFKSAASRNKTSYNNKTMSKTPVVDGAKPIIGHLHLLMGGDLPHHALGRLADKYGPIF  
LMHIGAFPELVSSSELAKECFTTNDKYIINRPTNKAMTYLSYEQASVGFAPYGPLWIEMRKISKNLLS  
NQRIHMQKQVRVAELDAFFKELYQLCRSNDENNNTSHGKVLVEMNKWFEELTLNVVTRMICGKQKMG  
KARLGSDAKHYKKTIDEAAHFMGNLVISDVVPCLGMLDNLGHVSAMKRTGKELDTIFGSWVEEHQKI

RLSGYKDDAEIEEEHDFIDLTL SMMKGSTDLHGLDPATFIKSICVGMILGGTDTTSVALTWILSLLLNNRH  
ILKKAQEELDHQVGKERKVEDSDLNNLVFIGAIVKESMRLYPVGPLIEREAIEDCQIGGVHVKAGTRLLI  
NIWKVQQDPKIWPNPSEFRPERFLDSNMDVKQHFELIPFGSGRRMCPGMSFAINELNLVLARLLQGFEL  
ETPMNAKVDMTETSSVTNYKGTPLQVLLTPRLSSKLYM

>HCACYP82-3

MEYSHLLPWLATSIAAIFAFIFLFYVRRRKNKAFIHNHAKKAPVVP GALPFLGHLRLFTGPILPHKALG  
ALADKYGPAFTIYLGSHQTLVVS GRELVKECFTTNDRLFSNRPRSKAVKYLTYDEASVGFAPYGPLWVEM  
RKVSKLNFLSNQRIQMOKQALASELNFCFKDVYQLWLKNKELPVMVDMTKWFEEMTLNVITRLICGKQNY  
GSKANSGESEAKRYKQVVEKAAHLTSTVVMSDVFPFLEWFDKFQGEKVMKKVANEFDSILGSWVDEHRR  
KRLLRGNNEEEEEQDFIDL SLAMMEETQLHGVDPTFIKSMCLGMILGGGDTTPVALTWALSLLLNNPD  
IMKKAQEEIDQVIGKERKLDGSDISNLVYLQAVVKESMRLYQVGPLIERETTEDCKIGDFHVEAGTRLLV  
NIWKVQQDPCVWSNPTEFQPERFLSSKSDMDLKGQHFELIPFGSGRRMCPAVASALQMMHLVLAKLIHGF  
ELGTPMNAKIDMTETSSITNMATHLQVLLNPRLNANLYDF

>HCACYP82-4

MADFTMLLQWLLLTMATLLFLNAVYKSIKSSKNTINDTSFKKGKKAPVAAGARPF IGHHLMLVGGKQLPH  
QALGKLADKYGPAFIINIGPNPELVSSWELAKECFTINDRCFTDRPSNKAMKYLTYDEASVGFAPYGPL  
WVEMRKIAKSNCAFQQLQVQKRVRVLEIDLFFKELHELWSHAGAGATGTSVIPLSIDMKKWFEELTLNV  
ITRMVSGKHNYATKARKGDTEAKRFKRVI SEAAHFTGRLLLSDFPSLGF LDMQGRVNSMKRTGKELDS  
VLSSWVEEHRQKRVSNGNEQSPEDDDVEQDFIDLTL SMMEEIQLHWTADTFIKAICVGVILGSDTTSV  
GITWILSLLMHPDVLK KAREELDQVGLERKVDSDLNNLAYLRAIVKESMRLYQVGPLIERKAKQDCN  
IGGFHLKAGTRLLVNL SKVHKDPTVWSDPNEFRPERFFTHTNIDIKGNFELIPFGSGRRMCPGYLFAL  
SEIYLVLARLIHGFELRTPNDAKLDMTETSSVTNYRATPLQVLLTPRLSSKLY

>HCACYP82-5

MDYFSMPYQWLLTSLATLIVFVFIW SITAGKTSTTSNKAKKAPPIAAGAWPIIGHLHLIMGGELPHRLLS  
NLADKYGPIFMLNYGSQPGLVSS LKLAKCEVHNDRAVFKRPNSKAMKYFTYDQASFGFAPYGPLWVEM  
RKVSKSNLLSNQRLQLQRNQRASEVDAFIKELYQLCKKSNGTLMVEMNKWFEELTLNVVTRMVC GKKN I  
GAKARHGGDNEAKYKVIDEATIFTAKLVASDFFPSL GWVDYLGDES AIKQTAKELDSIIGSWVEEHR  
QKRLLSLNKDDYAEQDFIDITLSMIDQTQHGGIDADTFVKSMCVGMIFGGSDST SVALNWALSILMNNRH  
VLKRAREEIDTLVGKDRKVDVDVTKLVYLKAIVKESMRLCLVGP LLERVTVEDCEIGGFYVKAGSRIVV  
NIWKLQHPDLWSDDVMEFRPERFLT TNSNVELRGQHFELIPFGSGRRMCPGVTFAL ELMHLTLARLIHG  
FELGTPMDAKVDMTETSSVTNYKATPLEILLTPRLHPKLYDF

>HCACYP82-6

MFISITQQSMDSFHQYLATIIIFGVFSFVLFLIYYLPLKRSRSDKKRAAPKPVGAWPIIGHLPMLSRHQPP  
HITLGN IADKYGPAFTLQLGVHRA LVSSSEVAKECFTTNDKALASRPSSVALKLMGYNNAMFGFGPYGS  
YWRQMRKIVVLELLSNHRLQLLKHVRISEVSTSLKELYQVWASCTNKNDKGQVLVDMQQWFGDLTLNVSV  
RMIAGKRYFGASAACDEDEARRFQKAIKDFLHLVGLFVVS DALPFLEWLDIQGHQKAMKRTFKELDRILG  
KWVEEHRNKLDGGTNVGRDFMDVMSSILDDANISDYDADTINKATCLSLILGGTDTTMVTLTWALSLLM  
NNQHILKKAQDEIDIYVGKDKNVD ESDIEKLVYLQAIVKETLRLYPAGPLSGPHEAIEDCTVAGYHVPRG  
TRLITNLWKIQRDPRIWSSPCEFQPERFLT TQANVDVRGQHFELPFPGSGRRSCPATSFALQVVHLALAR  
VLQGF EFETQSNAPVDMTESAGL TNVKATPLEVLITPRLPLNLY

>HCACYP82-7

MESLHQYLAAVMSCIFALLFLY YFPWKIRRSSDNNMRSAP EAAGAWPIIGHLPMLGGHQLPHITLGNL  
ADRYGPAFTIRLGVCRALVSSSEVAKECFTTNDKAFATRPSSVAVKLMGYNYALFGLAPYTSYWREVRK  
IVILELLSNRRLELLKHVRISEVNTSIKELFQVWASSNNKNEKGQVLVEMQRWFGDLTINVAVRMVAGKR  
YFGASVNTCDDEEARRFQKAIKNFFHLVGLYVLSDSL PFLEWLD FEGHQKAMKRTFKDVCILQRWLEE  
HRRDKENGAMKEERDFMDVMLSILK DANLFGYEADTVNKATSLNIILGATDTTMVTLTWALSLLLNNRHI  
LKKAQEIDIHVGKDKAVDES DIEKLVYLQAIVKETLRLYPVAPLLAAHEAIEDCIVAGYHVPRGTR LIP  
NIWKIQRDPRIWSSPCDFQPERFLT TQANVDVRGQHFELPFPGSGRRMCPGISFGLQVVHLALARVLQGF  
EFDTPSNKAIDMTESAGLTNLKATPLQVLITPCLPLNLY

>HCACYP82-8

MDSILLPTPLMVSLFALLCLYYLIISRPRSSHNTSTKEAPEAAGALPIIGHLHLLGGRILPHITLGAMA  
DKHGPAFMIRIGVHRALVVSSSEVAKECFTTNDKAFASRPKHTAAELMGYNYAMFGFAPYGPFWSEMRKI  
IMAELLSNRRELELLKYIRDFFELKASIKELYMTWENHSVTNKGQVVVEMKKWFGDLTLNVILRMIAGKRYF  
GSNSTCDESEAKICQKGMRRDFRLLGEFLVEDAIPYLGWLDLQGFKKEMKNTAKELDILLQGWLEEHKKK  
REFSKDVKEEQDFMDVMMTILEDANFSDFDADTINKATCLTIISGGSDTTMLTLTWALSLLLNNQHVLKKA  
AQDELDTHVGRDRRVEDSDIKNLVYLNAIVKETLRLYPASPLLGIRVSTEDCTVAGYHVPSGTRLMVNAW  
KIQRDPLVWSDPFEFRPERFLTTHVNVVDVKQNFNLIIPFASGRRVCPGVAFALQMLPLVLAHLLHGFKLM  
TQLGGPVDTESTGLTNIKATPLEVVISPRLRPELYEMYT

>HCACYP82-9

MESLHQYLATILSCIFAFLLFLYYFPWKGRRSFDNNLRTAPEAAGAWPIIGHLPMLNQRDLPVTLGNLA  
DRYGPAFTIRLGVRRALVVSSSEVAKECFTTNDKAFATRPSSVAVKLMAYNYAVFGFGPYGSYWREMRKI  
VILELLSNRRELELLKHVRRISEVNTSIKELYQVWASNNKNEKGQVLVEMQRWFGDLTMNVVVRMVAGKRYF  
GASVTCDEEEARRFQKAIRDFSHLAGLYVLSDALPNIEWLDFEGHKKAMKTKFDLDCILQRWLEEHRRD  
RENGATKGERDFMDVMSILKDANPFDFEADTVNKATSLNMVVGTTETTTVTLTWALSLLLNNQHILKKA  
QDEINIRVGKDKPVDESIEKLVYLQAIIVKETLRLYPVPLPSVPHEAIEDCTIAGYHVPRGTRLITNLWK  
IQRDPHIWSSPCEFPERFLTTHANVDVVRGQHFELPFPGSGRRMCPGISFGLQVVHLALARVLQGFEFET  
PSNVPMDMTESAGLTNFKTTPLEVLITPCLPLDQY

>HCACYP82-10

MDSLLQLQIIGALAALIFTYKLLKVICRSPMTDGMPEPEPPGAWPIIGHLHLLGGQDPIARTLGVMTDKY  
GPILKRLRGVHTGLVSNWELAKECFTTNDRVLASRPMGAAGKYLGYNYAIFGLAPHGPYWSEVRKIVLR  
ELLSNQSLEKLVHVRRISEINTCLKNLFSLNNGNTPIKVDMKQWFERPMFNVTMMIAGKRYFSMENDNEA  
MNFVRKATEFMYLTGVFVSDALPYLEWLDLQGHVSAMKRTAKELDIHVGVKLEEHRRAKLLGETKNEDD  
FVDVLLTILPEDLKNQTYIHDRDTIIKATALALFLAASDTTATITLWALSILINNPVVLKRAQDELDKH  
VGKEKLVKESDIINLVYLQAIIVKETLRLYPVAPLLLPHHEAMEDCTVGGYHVPGKTRIFVNIWKLQRDPRV  
WFDPNFRPERFLTTHANVDVVRGQHFELPFPGSGRRVCPGITFSTQIMHLTLAHLLEHFNIVTPTKSNAG  
VDMTESLGITMPKATPLEVLLTPRLPSNLNQRD

>JDICYP82-1

MDSLQLIASVVCGLFAFLRIYYLLKKLSSNKEAPQLGGAWPIIGHLHLLGRVELPHIFFSAMADKYGPAF  
MIQLGMRRALVVSSAEIAKECLTNDKALATRPSSIAAEIMGYDYAMFGLGYPYGYWREVRKIVVLEFLS  
NRRLELLKHVRVSEISLSLKEYQSWEKQNKADPVLVHLDQWFGDMLNLSVRMVAGKRYFGATAACGE  
DESRKVQKATREFDRLLGLFVVS DYLPFLRWLDLEGHQKLMKSIGRELDLILQGWLDEHKTRRNSGGGAK  
GDQDFIDVMSLVLEDGNSNYDADKLNKATSLTMIVAGSETTMVTLTWAVCLLLNNPEVLNKAQDELDMH  
IGKDRQVEESDIKNLAYLQAVIKETMRLYPVAPLLIPHEAMEDCTIAGYHVVRAGTRVILNGWKLQRDPFI  
WSDPCEFPERFLNNDVDVVRGRHFELPFPGSGRRACPGISLALNVVSLTLARLLHEFKFNSPSEGKVDMS  
ESAGVVVAKATPLEVLIIPRLPSKFYEYYKL

>JDICYP82-2

MFSLQLLSTPLFGFFTLAIYYLLWTKSNKTKEAPQAGAWPIIGHLHLLARSELPHITLGAMADKYGPA  
FMIRLGTRQAIIVSNSEIAKECLTIKDRIFATRPSLVAFKLMGYNSAMVGLSPYGPYWRELKRIALKVL  
SQRRLES�KDVDSEISSLNHLHQIWSHQTEPNGKILVEMDQWFGDLTLNVAVKMOVAGKRFFSADAACD  
ENESRRCQKAIREFFRLLGQFVVS DSLPFLGWLDLEGYQKEMKSTAKEVDSILQKWLDEHKQKRQSAGAD  
RDQDFMDVMSLLEDASLSQYD TDTINKATCFSMIVGGSDTTKITL TWAL TLLNNPDVMMKKSQDELDIQ  
VGKDRHVEESDIKNLVYLEAIVKETLRLYPVAPLLAPHEATEDCIVAGYNVRAGTRLIVNAWKIQRDPLI  
WPNPSEFLPERYLNKDVDVKGQHFELIPFGSGRRACPGITFGLQVVSLTLARLLHEFEISIASGIKVDMT  
ESGGLVTAKATPLKALIAPRFLYSHHHI

>MAQCYP82-1

MNSLQFLATPLLTIALLCVYICIVWRKFSFRNGS KIKQAPWAGGAWPIIMGHLHLLAWGDLPHITLGALAD  
KYGPFVMMQLGMRQAIIVSSAEIARECFTTNDRILATRPSSIAVKLMAYNYAMFAFAPYGNWREIRKTV  
MLELLSTPRLES LKHVWEDEISTSVKELYELCASKTKTHGHVSVDMKQRFGLTLNVLVKLVNGKRYFGA  
NTDYTEHESRRCQKAVRDFFSLMGLFVVSDFLPFLERLDLQGYEKEMKRVAREVDGIVQGWLDEHKRRE  
SSETTHDQDFMDVMSILKDSKFSNSDYDADTINKATCFNMILGGSDTTMSTMTWALSALLNNPHMLKKA

QDELEFHVGKGRQVEESDIKKLTYLQAIKETLRLYPSAPLLAPREATEDCKIAGYHVPAGTRLIVNVWK  
IHRDPFVWPNNEFQPERFLNKDQVVKQHFELIPFGSGRRACPGVSLGLQVVSLGLARLLHGFELSIPS  
GSKVDMTETASLVTFKATPLEVFITPRLSPHMYVE

>MAQCYP82-2

YAWKRKNHTKDSKIKEPPQAGAWPIIGHLHLISRGGPLPHINMGAMADKYGPVFMIRLGVNRAVIVSSE  
IVKECFTTNDKFLNRPVGLALNLMSSYNNAMFGFSRYGYPYWREIHKIVMLELLSSSRLESKHWVWSEIL  
TSIEELYQLCQTQNKAEHPVLVEMKDFADMALNVSFRMVAGKRYFGASAGGNKDEARRCQKTRDFFR  
LVGLFIVSDALPFLRWLDLGGHQKEMKRTFEDLDYVLQGWLDEHKLNRKSGGNGDQDFMDVMLSTLYDSK  
FTDYDVRTINKATCFQLILGGTDTTTLTWALSLMLNHPVLLKKAQDELDIQVGKHRQVEESDIKNLKY  
LEAVIKETLRMRPVGPLLGPRAIEDCTIGGYRVRAGTRVMVNAWKVQRDPSVWPNPDDFKPERFLKKDI  
DFRDQNFELIPFGSGRRACPGISFAVELLPMALARLLHGFELKTQLGCKVDMTEHAGLVHAKATPLEVLV  
SPRLSRELYVSS

>MCACYP82-1

MDSTDHHLALVIPTLLATPVLLFSFYCLLLRPRSLKPRNTNKPPEPSGSWPIIGHLHLLSQGLPHITLGA  
MADKLGPAFSIRLGTRRALVVSSWEVAKECYTTNDRAFASRPSSIAVKLMSYNNSSILGFAPYQYWREL  
KIVVLQLLSNRRLESKLVWESEIDLSIKELYDTWASNRGGEALMMDKQWFGDLTMNIVVRLVVEKRCF  
GRSVGDDETEARRGQALKEFLKLVGLFLVEDAFPFLSWLDVQGHQREMARIARELDSLFQGWLEEHKRC  
RSIKGEAKGDQDFMDVMLSVLEDSTISTDIEDDTVIKSTCLTVVLGGSDSTVGTLTWALSLLLNNRHE  
LKAQDELDAYVGERQVDES DIKNLVYLQAIIVKEVRLYPAGPLSGPRESVEDTVVAGYHVPKGTQLIVNL  
WKIQREPSIWADPLEFQPERFLTTHKGMVDVWQHFELIPFGSGRRSCPGTAFALQVIHLTLARLLHGFEL  
TTPCGAPVDMSESAGLINVKTPVEVHVAPRLPLKLYKS

>MCACYP82-2

MILIAMGNHIELQDIILYSLGFFAATILWRIFSTYVLRNNSCSRPEAAGKPLIGHLHLLGANKILHHT  
LGMADRHGPIFSLNLGKIRTLVITSWEVAKECFTTQDRVFATRPKSLVGKVVGYNSTVMIFQYGPYWR  
EIRKLAMIELLSNRRLEMLKHVRESEVNLFIKELYEQWSSNENGSKVVVEMKERFGDLTTNIVVRTVAGK  
KYSGTGVHGNEESRRFQKAMTDFMHLAFLFMVSDALPLLGWIDTFKGYRGKMNKTAEEIDHVLGSLKEH  
QQKRKNISINHLDEDFIHVMLSAMDGNQFPDIDTETAIKGTCLSLILGGYDTSATLTWALSLLIVNNHHV  
LKKAQDEMDKYVGRDRQVKESDVKNLTYLQAIIVKETLRLYPAPLSVQHEAMEDCTVAGCNIPAGTRLVV  
NLWKMHRDPKVWSDPLEFQPDRLQKHVNVDIWGQNFELLPFGSGRRSCPGITFAIQVLHLTLAQLLHAF  
QLGTVFASPIDMTESSGVTNPKATPLQVTLTPRLPPEVY

>MCACYP82-3

MDSTYQLLSALLFILCLYYLVCKPITKTKNDEAPVPAGAWPIMGHLHMLRGNLPHITLSSMADKHGPAF  
TIRLGTRRALVVSNSDLAKECFTVNDKAFSTRPSTVATKLMGYNNMTMFGFAPYGPYWRELKIVMTELLS  
SRRLESASVWASEIESSVKELFAEWAENRAKGPVVVEMGEWFGNLTNLIALRMVVGKRYLREESRCKLK  
AMRDYPELFGFRFLVEDAVPFLGWLDLIQGYQREMKTARELDSVLEKWLVEHKDKRGSGEKGEHQDFMD  
VMISVLEDSKLSYGEADTVNKSTCLNLILGATDTTMVALTWALSLLLNNKQVLKRAQQELKSQIGNNKQV  
SQSDIKNLLYLQATVKEALRLYPPEPLSGPREALEDCTVAGYRVRAGTRLIVNLWKIHRDPSIWQVPLEF  
RPERFLTAKHDVDVWQHFELMPFGSGRRSCPGISFVLQVVPLILARLLHGFELTTPGEALVDMSESAGL  
VNAKVTPLEVVISPRLPLELFA

>MCACYP82-4

MIMMFIDYSSWLPQTLQLLSILLAVSLVIFINLFLTRRRSYSSKSHTNIIHPPKAAGALPVIGHLYTLF  
RGLSAGVPLYRQLDAMADRYGPAFIIHLGVYPTLVVTCRELAKECFTTNDQTFATRPSTCAGKYIGYNYA  
FFGFAPYGPYWREARKIATVELLSNYRLDSLHRVREAEVGRNVDELALHASSSTNKQNMKIDMKQWFD  
QVTLNVLMMVVGKRCVTTGGNEEEVRVVKVLEHFFKHLGTLVSDVVPYVEWMDLDGNIGRMKSTAKEL  
DCILGRWLEEHRRERRSDFMDAMLAMVEGIKIPYYSDTVIKAIICLNLLNAGSDTLGITMTWALSLLLNN  
RHVLLKVKDELVDVHVGKNRQVEELDVKNLVYLHVVKETLRLFPAPLGPHEAMEDCVVGGFHVAKGTR  
LVVNVWKLHRDPSVWSDPLAFKPERFLDNNTVDVRGQHFQLLPFGSGRRGCPGITFALQVAHLTLARLLH  
GFEWDTDPGAPVDMSESVLTTAKKNPVEVLFPTPRLPAEVYTON

>MCACYP82-5

YQLLFLQTAIAGLLFALALLVRLRFSRRNNGKKKQAPPEPAGARLIMGHIHMLNSGEQPHKTLAALADQY



GPVIKRLRLGRDAIVVSNWEMAKECFTTNDKIFLSRPQTVVSKFMSYNLKMMLGFAPYGPYWREIRKIVVS  
ELLSNRRLELLKNAWTSEISSWVKELFDEWGAKEARGPVVVDMRHWFNLA FNIGMNMVAGKRFFGPRVV  
SDEDGLRRVQQGLTDFRFLIGAFLLLEDAVPFLSWWDSQGYQKEMKDTAREMDTLIQGLLDEHKRRRSSSS  
GEAKGEKDFMDVMLNILEGSKFPSGDADNINKSTCLSLMLGLTDTTATLTWALSLLLNDPRVLKAREE  
LDFHVGNRLVDTSDLMNLPYIHAIVKEVLR LHPPAPLSGHRESLEDSVVGGYHVPKGRTRFMVNVWKIHH  
DPNKWPDPIEFRPERFLTTHKDVWVWQNFELIPFSSGRRVCPGASLSLQVLPFTLARVLQGFVATPGG  
APVDVTEKGLSTAKETPLDVVITPRLPEKFYH

>NDOCYP82-1

MDSLISFQAIIVGLFILILVSYQWLGRSRSIKTNKHNEAPEPAGRWPIIGHLHLLGGSDQLLYRTLGSMA  
KLGPAFNIRLGSRRAFVNSWEVAKECFTINDKALASRPITVAAKLMGYNYAVFGFAPYSPFWRAMRKIA  
TLELLSNRRLEMLKHVRISEVDMGLKEIYGLWSKNKDSGPLMIELNRWFENLTLMNVVRM VAGKRYFGAD  
ASCDENEAQRCQKAISEFFRLIGIFVVSDAIPSLWWLDLQGHKAMKRTAKDLDSILGGWLEQHRSRVN  
GKVPTEGEQDFIDVMSLQEGDHLSDFEYDADIAIKSTCLALILGGSDTTAGTLTWAISLLL NHPYALKK  
AQEELDLHV GKDRQVYDQDIKNLVYLQAI IKETLRLYPAGPLLGPREAMEDCTISGFDVRAGTRLVNVW  
KIQRDPNVWSNPSEFSPERFLTSHVDVDRGQNFELMPFGSGRRSCPGASFALQVLHLTLARFLHGFLA  
NPLGKPVDMNESPLTIPKATPLNVLLTPRLDSELYGC

>NDOCYP82-2

METFQFLGIPLFGFFALLCTYYLVLRKPSSTKIREPPRPAGAWPIIGHLHLLARGDLPHVTLGKMA  
PVFKLKLGVRAIVVSDWEVAKECYTTNDRALANRPSGLGAKIMGYNYALIGSAPYGPYWRDLRKIITL  
VLSSRRLKLVHVDSEISTSVKELYQIWADQNKAAQGVSVEMKQWFSMTLNVAVRLAVGKKYLGATAD  
CEKNKAVQCQKAIRNFRLAGLFVADYLPFLGWLDLGGHEKEMKHTAKELDYIAQEWLDDHKKKRTSNR  
TVDEPQDFMDVMSILEESTFTGYDVDIINKSTCFALILGGTDTVAVTLT WALCLLLNNPHVLKKAQDEL  
DIHVGKDRHVNESDIKNLVYLQAMIKETLRLYPAGPLLGPQVIEDCTIAGYHVRAGTRVIVNAWKFRD  
PSIWSNPCEFQPERFLDKDIDVKGQHFELIPFGAGRRACPGISFALQVLPLALARLLHGFELKNPSESQV  
DMTETPGMVHAKTTPLEVLITPRLSPKFYV

>NDOCYP82-3

WKRPTSVKYREAPQPAGAWPIIGHLHLLARGDLHHITLGAMADKYGPAFMMRLGVHQAMVVSDES  
STTNDRVLATRPSSVAVKLMGYNYAMFGFGPYGSYWREIRKIVILEVLSNHRLES LKHVWKSEISMSTKE  
LYQLWINQNKDEGPTLVELKQWLCNMTLNIGVRTVAGKRYFGASSCDANESNRIQRAIRDFFRVGLFV  
SDFLPFLGWLDLEGYQKEMKSIARELDSILQGWLDEHTRKRQSGGTNENQDFMDIMLSVLEHSNALTHYD  
ADTINKATCFTMILGGSDTTMVTLTWALSLLLNNPHVLKKAQDEIDIQV GKDRLVDES DIKNLVYLQAI  
KETLRLYPAPVPIITPHEAIEDCTIAGYHVPAGTRLIVNAWKIQRDPLIWDNPGEFQPERFLYKDVV  
KGFHFELIPFGSGRRVCPGISLALQVVS LAMAHLLHEFDLAKPSEGNVDMTESVGLVNAKATPLEVLIT  
PRLSPKFYE

>NSACYP82-1

MGSFNQINPSVVYFAAFTIFFFFFFLYKILYKRRTSAKTRVAPEPAGAWPFIGHLPLLSQQLPHVTL  
ADKYGPAFTVQLGLHKAVVSSWEVAKECFTVNDKVLATRPSSVAVKIMCYN YAVFGFGPYGSYWREAR  
KIVVRELLSNHRLNLLKHVLVTEISMSMNELYTVWQKNANNVSGKALVEMKQWFGDLSLNMIVKIVAG  
KRYFQASANS DERDQKRGVQDLFHLVGLFLVSDALPFLSWLDIGGHEKAMRR TAKELDNILG SWLDE  
HKQAKLAGATKGEQDFMDVMSILEDNNNLPEYEPDVVSKAICLGMILGGADTTTITLTWIVSLLLNN  
QHILKKAQDEIDSKV GKDRQVNESDIEKLVYLQAI VKETLRLYPAPLSTQHEAMEDCTIAGYHVQAG  
TRLITNIWKIQRDPGVWPNPCEFQPERFLTTHANVESNGKHFEFIPFGSGRRACPGMSLGLQVVHL  
TLARLLQGFLETPLSVEVDMTESAGLTNLKVTPLEVLINPRLPSNLY

>NSACYP82-2

MDLTSILICIFLFIISICFLSWKRSRSLSGTRAPEPVGAWPVIIGHLRLMGSKTPHMTLGNLADNY  
GPAFTIRLGT KTLVSSWEVAKECLTTNDKAFAGRHSTMAVEIMGYNYAFFSLGPSGQYWREIRKITV  
SELLSNRRLELLKHIWSSEIKTSIKELYEICAAQSQYGGKQSPMVEMQQWF SHLNLNLSARMVVGKRY  
FADGVEENEGDIRRFQNAIKEFFYWAGAFIADTIPYLRWMDFLNERSMKRTAKETHVLEGLQE  
HKNRNLNGVTKEQDFMDVLLTELGDKDLCGYTADVVKATCLNMI FGGTDTTKTGM IWTLSLILNNP  
QVLKKLQNEIDIQVGKDRQVDDSDIGNLVYLQATVKEAMRLYPPATIFGRESIEDCTVAGYHIQAG  
TRLIVNAWKIQRDPNVW

PNPDEFQPERFLTNQADVDFRQDFELIPFGAGRRACPGISLTVRVTHLTLACLLQGFNFETPLNEPVDM  
SEKYGLTNSKATPLNVILTPRLPSNLY

>NSACYP82-3

MDSIFHMYAPINILAATFVFIVISVWFLWLMKRSRKNKSRRAPEPVGGWPLIGHLRLLVGPPELPHVILG  
SLADKYGPALSIRLGMQALVVSNCVVEKELTTNDRCFSTRPSSVAVELMGYNYASFGLGPYGGFWREV  
RKIAILELLSNHRLKSLKHVWISEISGFVKELYQLCVANGNTGRQSALVEMRQWLNDLTLNVSVRMVGK  
RYFGSGSEHGGEVVKRFQKAIKDFFRLAGKFTLADAIPLRDLDFGHERAMKKTAKELDYVLARWLDQHQ  
KNKLNCEKQVDQDFMDVMLTVLGDLDYGFKADVVKATCLNLILGGVDTTSVTLTWALSLLLNNPNIL  
NKAQEEIDVQIGKDRQVDDNDLGLVYLEAIVKETMRLYPAGPLSGARAAIEDCMVAGYHVPKGTRLIVN  
TWKIQRDPEKWDNPSEFRPERFLITTTNGHVEVWGQHFYIPFGSGRRICPAISFSLQLVHLTLARLLQA  
FSFQTPSNAAVDMTETPGLVNFKATPLQILLTPRLPSSLY

>NSACYP82-4

MLSIIHSTMVFLQLQAICGIFGFIFITWTRWKSNNKMAPEVAGAWPVIGHLHLLGGGRPLYQLLGD  
SDKYGPAFTLRMGIQKALVVSSWEVAKECLTTNDRALATRPSSAGGKYMGNALIPFSPYGPYWRDMR  
IATLELLSNHREELKHVREMEINTCISDMYKLCQVEDGVEIKPISVDLSQWFADLTFNVVMMITGKRY  
IGSTDAGDMNEIRHFQAALVKFMRLLRISLLVDVFPVLQWINYGGFKGVMKSTARDIDSVLENWLQEHQR  
KRLSPDFNGNHDFIDVMISTLEGTEFSDYDHNTIKAISMAMVVGTDTTTTLWAISSLLLNNPNAMKK  
VQEELEIHVGKERNVDGSDIQHLVYLQAVVKETLRLYPPVPLSVMHQAMEDCVIGSYNIQAGTRVLFNLW  
KLHRDSSVWSDPLEFRPERFLTSHVDVDVRGQHFELIPFGSGRRSCPGISFALQVIHLTIARLFHGFNLT  
TPGNSSVDMSEISGATLSKVTPLEVLVTPRLSSKLYN

>NSACYP82-5

MDFLIYVAFAAAFFLLFYNILSKRITGTRRIAPEPAGAWPFIGHLPLMFGPNLPHVTLGALADKYGP  
AFTIQLGLHKALVVSSWEVAKDCFTVNDKALATRPSSAAVKIMAYNCAVFSFSPYGSYWREARKIAILEL  
LSHHRDLLKHVRKSEVSTSIRELYQFWQKNATEVTKFAQLEMKQWFGDLTMNLIVRMVAGKRYASVQSD  
DDGEGKRLQKAVNDFHFLVGLFVVS DALPFLGWLDIGGNLKTMMKTARELDSIMECWLKHQARRSNGEQD  
FLDVMSILREDNKLQEYDGDVVVKAMCLNMILGGADSTTITLWTISLLLNNRHILQKAQDEIDSKVGG  
DRQVNESDIEKLVYLQAIVKETLRLYPPAPLSSQHEAIEDCTIAGYHIPAGTRLITNLWKIQHDPVSWHN  
PSEFQPERFLTQANVDFRQNFEPFIPFGFGRRSCPGTSLGLQMVHLPLARLLQGFTEFETPSNAAVDMTE  
SAGLTNHKVTPLEVLISPRLRFDLYQESPP

>NSACYP82-6

SFNQTYTGFICLSVFAFFFFFLYSVQQRRTGRKARYAPEPTGAWPLIGHLPILFEPNLPHIQLGALAD  
KYGPVFSIKLGLRKALVVSSWEVVEKCFVTKDKVLASRPSSVAVKIMGYDYAVYAFGPYGSYWREARKLT  
ILELLSDHRDLLKHVRVSEVSMKELLKFCQKNANNVSGKALLVDMKQWFGDLTLNVIVRMVAGKSYL  
GASAKLEDGEQKRLQNAIHEFFRLAGL FVVS DALPILSWLDIGGHEKAMRRNAREIDKIMSSWLDEHRRN  
KLAGVTNGEQDFMDVLLSKFENSNLPGYEPDVAIKAICLNMILGAADTTIVTLTWVVSILNNRQILKKA  
REEIENKVGKDRQVNESDIEKLVYLQAIVKETLRLYPAAPLSAHHESMEDCTIAGYHVPAGTQLITNLWK  
IQRDPRVWPNPCEFLPERFLTTHANVNYKQNFEPFIPFGYGRRSCPGMSFGLQMVHLVLASLLQGFLET  
PLNEAVDMTESAGLTNLKATPLEVLITPRMPLNLY

>NSACYP82-7

VTVIYLFYFAIFFYLYSILWKNPRKSAKTRVAPEPAGAWPFMGHLPLLEPNLPHIKL GALADKYGPAFT  
VQLGLHKALVVSSWEVAKECFVNDKVLADRPSSVAVKIMGYDNAVFAGPYGSYWREARKISTVELLSN  
HRLSLLQHFRISEASMSMKELYQLCANNGKALVEMKKWFGDLSLNVIVRMVAGKRYAKASEDDERRQLQK  
GLKDFFYLVGLFVVS DALPILSWLDIGGHEKAMRRTAKELDTIMERWLDEHRAKLAGVTKGEQDFMDVL  
LSILEDGKLPHYESNTVNKAICLTMILGAATTTVTLIWTLSLLLNNRHILNKAQDEIDSEVGKDRAVTE  
SDIKNLVYLQAIVKETLRLYPAAPLPAHREVMEDCIIAGYHVPVGTRIITNLWKIQRDPRVWSNPAFQP  
ERFLTTHSNVDFRQNFEPFIPFGSGRRSCPGISLGLQMVHLALARLLQGFLETPLNLGIDMTESSGLTN  
LKVTPLEVITPRLPSNLY

>PBRYP82-1

MAYLMIKKSFHLFSDQPTSVSTLIVLAFLLTLSPVIIYYEQKKRGLRRNRTSSSCTAITTTPLPEASGAW  
PVIGHLLLFMNENDLNHATLGNMADKYGPIFSLRFGSHRTL VVSSWEMVKECFTGANDKFFSNRPSSLAV

KLMFYDTESYGFAPYGKYWRELRKISTHKL LSNQQLDKFKHLRISEVDNSFKKLHDLCSNNKLGGETTSV  
ANLVRMDDWFAYLTFNVIGRIVSGFQSNVSGATSSQEKYKLAIDEVSNLMATFAVSDVVPCLGWIDRLT  
GLTGKMKKCGKKLDAVVGDAVEVHRQKCLKISRNTAGELTEHEEEDFIDVCLSIMEQSQIPGNNPEISVK  
SIALDMLSGGSDTTKLIMTWL SLLL NHPDILDKAKEEVDTYFRKKKISDNTPVVDAADV PNLVYIQAI I  
KESMRLYPASTLMERMTSDDCEVGGFHVPAGTRLWVNVWKMQRDPRVWNP L VFRPERFLSNDKGMVDVK  
GQNYELIPFGTGRRICPGASFALVHLV LTRLILEFEMKAPEGEIDMRARPGFFNNKVPLDVLLTPRT  
LD

>PBCYP82-2

MNNYSSSPASSTETA VLCHQRQSCALPISGLLHIFMNKNGLIHVTLGNMADKYGPIFSFPTGSHRILVV  
SSWEMVKECFTGNNDTFFSNRPIPLAFKIIFYAGGVDSYGLALVPYGYWRELRKICVHNLLSNQQLLKF  
RHIIISQVDTSFNKLYELCKNSEDNQGMV RMDDWLAQLSFSVIGRIVCGFQSDPKTGAPSRVEQFKEAIN  
EASYFMSTSPVSDNVPMLGWIDQLTGLTRNMTHCGKKLDLVVESIINDHRQKRRFSRTKGGDEKDDQDD  
FIDICLSIMEQPQLPGNNPPKIPKISIVLDMIGGGTDTTKLTTIWTLSLLLNNPHVLDKAKQEVDAHFL  
TKRRSTNDAAVVDFDDIRNLVYIQAI IKESMRLYPASPVERLSGEDCVVGGFHVPAGTRLWVNVWKMQR  
DPNVWADPMVFRPERFLSDEQKMVDVRGQNYELL PFGAGRRICPGVSFSLDLMQLV LTRLILEFEMKSPG  
GEVDMTATPGLMSYKVLPLDVLLTHLSAS

>PBCYP82-3

MEFLMKLLLLLEPITFSIFLIGSIVLLYNVFFLVINKKKKKKAPNASGAWPLIGHLNLFMNDKEALYKT  
LGTMADKYGPAFNVRLGNQEILVVS NWK MVECFNTQNDKLF SNRRTTLGVKYM LNKTSVAFSPYGTYW  
RELRLTVQQLLSKQR L DSWKHLKIKEIDASFGRLNDLCSNNKGTGAATPIRMDSWFAELTFNVFARIVF  
GYQSGERMLSGDTASNGERYKKTLEEAFLMSSFAVSDVFPCL EWVDRSGLVRS MKRFGDQLNSIAGC  
LIEEHRQKRSQSVSASNSTNDKGVGDEQDFIDVLLSVAELS QIPGDDPDLVIKSMILEALAGGSDTTTST  
LTWVLSLLL NHPKVLKTAKEEIDMHVGRNRCVEESDIPKLVYVNAI IKESMRLYPNGSLVDR L TLEECEV  
GGFHVPAEGHLFVNVWKIHRDPSVWENPLEFKPERFLSNDCKVDMDFISQKYE FIPFGIGRRICPGMLSA  
LQVMHFVVARLIHGFDMEAASADGKVDMAEKPGMT CYKMTPLEVMLTARQ

>PBCYP82-4

MYPVNQLQSQAIAVLCAVIVFIFYLGRKLFNSTHIHKPGKTAPEPAGAWPIIGHLHLLGGAKLMYRTLGS  
LADEYGPVFMVRLGMRRVLVISNTASARECFTTNDKVFATRPTTVAIKLLTYNHTMFGFAPYGPYWREIR  
KIATTELLSDRRLAMLKNWWISEINLCINELHQLLMDKNSRKVDH HQHVYNQNMDPISVEMNGWFADLSF  
NVVARMIA GKRYFGKNTDGGEEETRRYREAMNDFMHLV VILLVSDAVPFLGGLDFQGYKKRMKKTAK EID  
YFLGKWVDEHRQRLKYKNISKVDQDDFIDVLLNLNDQPIYGRD TDI IKSTCLSLIAGGSDTTAVTLT  
WALSLLLNNQHVL RKAQDELDIHVGRERQLEESDIKNLVYLQAI VKETLR LYP AAPLSAPRMAMEDCTVA  
GFQVSKGTQLMLNVWKLHRDPHF WGPDPLEFRPERFLTADGSSTGSGHCIDIDVKGRHYELL PFGSGRRM  
CPGVSFAMQVVHLTLATLLHGFHLSTPTDGPVDMTETSGLS CPKATPLEVLLTPRLPC

>PBCYP82-5

MDVAIIVDHHYLQPFVSIAGLLALLSFFYCIWVFIIRPRIIKSNLDERKLSPPSPPEVAGAWPIVGHLPQ  
LIGSTPLFKILADMSNKYGPIMVRFMGMYPTLVVSSWEMSKECFTTNDRLFATRPPSAAGKYLTKALFAF  
SVYGPYWREIRKISTIHLLSLRRELLKHGRYLEIDKCMKRLFEYWMEHHKNIISTTSSVKVNMSQVFAE  
LSLNVVLKIIVGKTLFIKNGNEDYTKEEEEGQKLHKTILKFMELAGVSVASDVLPFLGWLDVDGQKQMK  
RVYKEMNL IASKWLG EHRERKRLQIIQKGAARGSNYDDGNDFMDV LMSILDEENDLFFGYSRDTVIKS  
TCLQLIVAASDTTSLAMT WALSLLL TNPV LQKAQDELDTKVGRDR IIEEHDIECLVYLQAI VKETLR L Y  
PPAPLSLPHEAMEDCTVGGYQVKAGTRLV VNLWKLQRDPRVWSNPLEFKPERFLPQSDGGFGGEEARMDF  
RGQHF EYTPFGSGRRICPGIDFFLQTVHMALARLLQAFDFNTAGGLVIDMVEGPGLTMPKVTPLEVHLNP  
RLPVTLY

>PBCYP82-6

MQVDWPNILQKYPIITCSLLTLLSFYYI WVSITKPSRNSKTKLPPPEVAGSWPIVGHLPQLVGSTPLFK  
ILANMSDKYGPIMVRFMGHPTLVVSSWEMSKECFTTNDKFLASRPPSASAKYLG YDNAMFVFS DYGPYW  
REIRKISTLQLLTHKRLDSLKNIPYLEINSCVKTYTRWAKTQSQIKQNVGGAADD FVKVDMTEMFHGLN  
LNVVLR LVVGKPIFIQKDNADEDYTKDGHNKEELGQKLHKTII EFFELAGASVASDVLPYLGWLDVDGQK  
KRMKKIAMEMDLFAQKWLEEHRQKGINHDNENDFMAVLISVLGEGKDDHIFGYSRDTVIKATCLTLIVAA

TDTTLVSLTWALSLLL TNPRVLSKAQDELDTVVGKERNVEDRDVNHLVYLQAVIKETLRLYPPSPLAVPH  
EAIENCNVGGYEVKARTRLLVNLWKIHRDPRVWSNPLEFKPERFLPKLDGGTGEASKLDFKGDQFVYTPF  
GSGRRMCPGINFASQTLHMTLARLLHAFDFDIESNGLVIDMTEGSGLTMPKVTPLQVHLRPRLPATLY  
>PBRCP82-7

MMDLAMFIDQYFSLAKIAGLLALLSFFYYLWISTLWSPRNPKLSVSPPEVAGAWPILGHL PQLLGSRPL  
FKILADMSDNYGPIFMVRFGMHPTLVVSSWEMAKECFTTNDRFLAGRPSGAANKYLTFALFGSTYGPYW  
REIRKIATLHLLSHRRELLKHVPDLEVTNCKMHLHRRWIDSQNIKQNDAAAGSVKVD MGRVFGELTLN  
VVLKLVAGKSIFKNDNTRQYDSKDGHNKEEEEGKKLHKTIIDFYSLAGASVASDVL PFLGWLDVDGQKK  
RMKRVAKDMDFIAAKWLEEHRHQKRQTVLSSSATLGSSNHDDAKDFMDVLM SILDGENDDLFFGYSRDTV  
IKTTCLQLIAAAADTTSVTMTWALALLITNPTILRKAQDELDTKVGKDRNIEERDINDLVYLQAIVKETL  
RMYPAGPLNVPHEAIADCNIGGYEVRA GTRLLVNLWKMHRDPRVWSNPSEFKPERFLPQLDGGSGGEAAN  
LDFRGQDFEYLPFSAGRRMCPGIDFSLQTLHMTLARLLHGFDFNND SAGI IIDMEEGSGLTMPKLTPL E I  
YLCPRLPALY

>SCACYP82-1

MEFLSLQFQPITIFALLLATPIFLYNLWNYGRKLNKKNKSRKPPAPEASGGWPIMGHFHLFNGTEVTHR  
ALGSMADKYGPAFNIRIGSHPTLVVSSWEIAKECFTTNDRLF SNRPGSLAIKLMFYDADSVGYAPYGTYW  
RELKISTLKL LSNHRL ETLKHLRTSEVESCFKQLHDLWRMNNKKGSDDGSD FALVRIDNWFGLT FNV  
VARIVAGKKNFAGGAASGDAGA QRYKEAMDEAFRLMTRFAFSDVVP SLGWLDKLTGLVGGMKRCGSEIDS  
IVASWVDEHRLKRISGKEGDDLEQDFIDVCL EILEHSTLPGGDPEVVIKSTCLDMILGGS DTTTTVTLTWA  
LSLLLDHPHVWKRAKEEVD AHVGERQVEDSDIPNLVFIQAIVKETMRLYPAGPLIERRTDDCEVGGFH  
IPGGTRLIVNLWKIQRDG SVYKEDPLEFRPERFLTSNAEVDLKGQNYELIPFGAGRRICPGVSFAVQLMH  
LVLARLIHDFEITMPMGAKVDMTESGGLISHKVTPLEVLLKPRLPSLQQAALY

>SCACYP82-2

MEYSSVLLHWFASMAALLALVFLYNLIFNSPKTGNKKIIRRAPKAAGAWPVLGHLHLFGSGELPHKMLA  
AMAKEYGPAFTMKFGKHTTLVVS DTRVVKECFTTNDTLFANRPSTKAFDLMTYANDSVAFTPYSPYWREL  
RKISTLKL LSNHRLQSIKEVRVSEVSVCFRELYDICKNDGGGAPPVLVDMKKWFEEVSNNIVMRVIVGKQ  
NFGSKI VCGEEEA VNYKNVMD ELLRLASVSMLS DVAPLLGWLD MFQGHMSAMRRNGK KLD TILERWLEEH  
RKKKSEDEQDFMDVMLSIVEETKLSGRDADTVIKATCLAMIMGGTDTTAVSLTWIVSLLMNNRYALKKAR  
EELDALV GKDRQVEDSDLK NLVYLN AVVKETMRLYPLGTLLERDTKEDCEVGGFHVEGGTRLLVNVWKLQ  
RDPNVWNDPLEFRPERFLTENADIDVGGQHFELLPFGAGRRVCPGVSFALQFMHLV LARLIHGYELGTQN  
DEDVDLTESTEGHVNHKASPLDLLITPRLHPKLYE

>SCACYP82-3

MDYSSHLNQFYGVAPYMAALLIALVFLYNILWASPKTTNKKPIMAAGAWPILGHLHLFKDGELPHHMLKS  
MSDKYGPAFLMKFGQHRTL VVS NYRMVKECFTTNDTHFCNRPSTTAFDVM TYANDSVAFTAYS PYWREL R  
KISTLKL LSNRLQAIKNLREAEVNSFRGLYDLWKNNSDRAASVLVDMKKWFEEVSNNVIRVIVGKHN  
FGTKIVKGEKEAVEYKTIMDELLRLASLSL SDFAPILGWVDF FQGNVRKMKRNGK KLDVVLQRWLETHR  
RKKNSPEDEQDFMDVMLSIVEEGDKLSGHADTVIKATCLAMIMGGTDTSAVSLTWIVSLLMNNRHALKK  
AREELDMYVGKDRQVEDSDLKDLVYLHAIVKETMRLYPLGTLLERETKEDCKVGGFHVEAGTRLLVNIWM  
VQRDPTVWSDPTKFI PERFLTEKADIDVGGQHFELIPFGAGRRVCPAVSFALQFLHLILARLIHGYELGT  
PNDADVDL TESPEGHVNHKASPLELLLTPRLDPKLYI

>SCACYP82-4

MNSIAVVGVLFFLYYLWRTLFTTHKAAPPQPAGARPIIGHLHLLGGANQLVHQTLGSMADKYGSIFMI  
RLGMRRVLVSSSELAKECFTTNDKVFLNRPSSLALKLMAYNNAIFGFAPFGPYWRKMRKIAVTELLSNR  
RLEILKNIRISEINMSIKELHQLWVDMNSGDDQVGGPPIVVEMRKWF GDLSFNVVGRMIAGKRYFGRNCD  
CDEEETRYQKAMGDFMHLVGVFVSDAIPLLGFLDLQGYEKKMRTAMDIDCVLGRWVDEHRRRRQDHD  
EKRIMVSDDDHQGQDFIDVMLSILNDDDQFYGYDADTVIKSTCLSLIAGGHETTAVTLTWALSLLLNNRH  
VLQNAQDELDIHISKERQVDES DIKNLKYLQAIVKEALR LYPALPLSALRLAMEDCTIAGFHVPKGTELM  
LNLWKLHRDPHVWSDPLEFKPERFLTNSTHEEVDVGGQHYELL PFGSGRRMCPGVSFALQVLHLTLARLL  
HGFHLSTPSGVPVDMTQSFGLSCKATPLDVLLTPRLPSKLYVA

>SCACYP82-5

MISTTPDVLATSSYSSSNKHMDSHLYRFSTSTSIVIGLFILLFFLVLLWPKPKQSATSKTNKPTREQRA  
PEPSSSWPIIGHRLFGGPNLPHITLGAMADKYGPVFTIRMGRPVLVSSWETAKECFTTNDRVFASR  
PRTIAIKHMCYEHVMLGFAPYGSYWRELKIVNRELLSNNRELLKHVWGSEINTSIKELYELWLVNKN  
IEAEGENEGTSRDLVEMERWFADLTNMSIKIVVGKRYPSGVTAGGSSGCDDDEAQRCKALRDFFLV  
GLFLVSDAIPFLRWLDLGGYEREMKTTARELDCLMEEWLEEHKMRLLISPSAGDHHEAAEIMINKQKE  
AELQEYDFMDVMSILDDDIKGNLSDYVDNADTINKSTCLNLILGSDTTMVTLTVALALLLNPHVLQ  
KAQDELDIHVGSKRQVDDSDMKNLIYLQAIIVKETMRLYPAGPLSVPHESTEDCTVAGYHVPAGTRLIVNT  
WKIQRDPRVWSNPSEFKPERFLTDSHVDIDVRGRNFELIPFGSGRRSCPGTSFALQVVHLVLARLIHGFE  
FKTPSEAPIDMTESVGLSNFKATPLDVLLTPRLPSQLYVVS

>SCACYP82-6

MDSTLVFIGLFALLLVYPLLLRRSVLKSTSNTNKTTYKSKNQAPEAAGAWPIIGNLHQLAGGGNCLHKT  
L  
GAMADKHGPAFTIRMGLHKALVVSSWELAKECFTTNDVVFMSRPHQVAIKHMGYSTAMFGIAPYGPYYRE  
MRKIVTQELLSNRRLELLKHVWASEINNSIKQLEYKVEGGPVLIEMKRWFADLTLRRTTVKVICGQQQFGG  
DDDDDEAGRQFQALRDFRLLGHFRVADVIPVLEWLDFOGQYKEMENNGRVLNLMNKWLEEHKRKRKNG  
GTEEDFMNVMISKLLDDTKMLSYDADTINKSTCLTLILGSDTTMVSLTVALSLLVNHVHLVKKAEEL  
DVHVGKERQVDDSDLWLSLYLQAIKETLRLYPPGPLSAPRESTDNCTIAGYHVPAGTRLIVNTWKIQRD  
PRVWDPLEFKPERFLTTHVDVDVKGQNFELLPFGSGRRACPGASFALRVLRLSLARLIHGDFKTPLEDD  
SPIDMVESSGITNVKDTPEVLVTPRLPSSLYVCK

>SCACYP82-7

MDFDLYQFSKPTIFIGGLFAILLYFVLKKSSTPKSKSKLEQPPEPAGAWPIIGHPLLLGGPDLPHITL  
GK  
LADKYGPAFTIRIGVHKAVVINSWEVAKECFTTNDKAFSSRPRQVAMKHMGYDYAMFGFAPYGNWREL  
R  
KIVNREVLSSHRIESLYHVWGTEINTSVKELYELWGGKSTGSGGAPVLVEMKRWFSDMTLNMSVMMVAGK  
R  
RYNFGNKADDEAGRCQDGLRNFFRLVGLFVPSDALPFLAWLDIGGYEKEMKVAKELDVLVQEWLEEHK  
E  
EKRLALTAAGKKGSENDFMDVMMNILEQKLEFADTINKATCLTLILGGDTNMVNLVWALTLLVNNQ  
D  
DALKKAHDELDFHVGKDRQVEESDVKNLVYIQAIMKETLRLYSGPLSGLRESTEDCTVAGYVVPAGTRLI  
I  
INAAKIHRDPRVWSDPTAFKPDFLTEQKEMDVRGQDFEILPFGAGRRICPGVSFALQVPLALARLIHG  
F  
DFKTPDAPIDMTESPLTNAKSTPEVLVSPRLTSKLYGC

>SCACYP82-8

MDSILNQFISKPTMVICSLFALLSLYFLLIKRSTTKSKLQLPPEPAGAWPIIGHLHQLGGPNLPHITLAA  
MADKYGPIFTMKIGTYRALVVSSPEVAKEIFTTHDRIWATRPNQAAMKHLGYDSAMFGFAPYGPYWREL  
R  
KLVNRELLSNTRLDLLHHVWDSEINTSIKELYDSLATKNNAKGRGTGGAGSTGPVLVEMKRWFADLT  
L  
TVRMVAGKRYFGANKTSSTSTDQCDNEKGDASKAWCQRELNRFFRLVGLFVVS DALPFLGWLDLGGHERE  
M  
MKNTARELDVLVQGWLDEHKRKRSLSVAEGGEKINGEQDFMDMMLSTIDDAKLSGYFDADTINKSTCLNL  
I  
ILGSDTMMVNLIWPLTLLVNYPDELKQVYDELDTHVGRDRQVDES DIKNLVHLKAVIKETMRLYTGRIT  
G  
GLRQSSDCTVAGYHVPAGTRLIVNTWKISRDPYWS DPLEFKPERFLTTHADIELTGQNFELIPFGSGR  
R  
RSCPGASFALQLLHLALARLVHGFVFERPSDAPIDTSECPGLTNFKATPEVLATPRLPSKLYVG

>SCACYP82-9

MDFILNQFISKPTMVLGTLFALLSLYFLLIKRSTTKSKLQLPPEPAGALPIIGHLHLLGGPNPPHITLAN  
MAEKYGPISIKMGLKRALIVSSSEVTKECFTTHDLNFVSRPRHAAMKLMGYNFATFGFAPYGPYWREL  
R  
MIINRELLSQTRILSLEHVWGSEINESIKELYDLLTRKGGGGGGPVVEMKRWFADLT  
L  
NIIVKVMVCGKRYFGVNSPSTSTRDVQEDDEARRCQKGMNFRLLGQFVVS DSIPFLGWLDLGGYQREMKNTARELDDLM  
Q  
QGWLEEHKKRRLERKTAAGEQDFMDVMLNILEDGKLSQYFDTDTINKSTCLSLILGSDTTMVNLVWAFS  
L  
LLVKHQDALKKTRDELDIHVGRERQVEESDIKNLVFLQAVVETFRLYAGPISGVREAAEDCTIAGYHVP  
A  
AGTRLLINSWKIHRDPRVWSDPLEFHPERYLEARHADIDVKGQNFELAPFGMGRRVCPGSAFGLQVHLHT  
L  
LARLIHGFEFKTPSDAPVDMTESVGMSSIIKATPEVLVTPRLPSELVY

>SCACYP82-10

MDISNLYELYYFSTPTLFVGGFLVLLLIIYSLFSSRPGIKSKLQQPPEPAGAWPLIGHLPVLSGPELPHVA  
LGKLADKYGPVFTIRMGVHKSLLVSDWEVIKECFTTHDKVFSRRCQVAMKLMGTAMFGFSPYGNWREL  
R  
RKIMNREVLSHGRIESLYHVWGSEINTSVKELYDLWAKNNGGGPILVEMKRWFSDLT  
L  
NMSVMMMAAGKRYNFGDDSSTTNDEAARCQHALREFFRLVGLFVPSDALPYLGWLDIGGYQKQMKKVARELDDLMQVWLD  
E  
H

KKKRLAAKAEGKKGGEQDFMDVMMTILEDGKLSDYDADTINKATCLTLILGGTDTNMLSLVWTLALLMN  
NRQALKKVHEELDIHVGRERQVEESDIKNLVYLQAVIKEEMRLYSGPLSGLRETTEDCTIAGYHIPAGTR  
LIINASKLHRDPKVWSDPLEFKPERFLTENVGVDVRGQNLQPFQAGRRICPGVSFALQVLPLTLARLI  
HGFELNTPGDAPIDMTESPLQNAKLTPLEVLITPRLPSKLYV

>SCACYP82-11

MIVIGAFALVVLVYYNLLRRPALLKFKNMKQQAPEAASAWPIIGHLHNLAGGIGGNLLHEKLGAMA  
DKHGPAFIIRLGLHKALVSSWEVVKCFTTNDVALISRPHQVASKHMGYGMAMFAFASPYGPYWRELK  
IVKQELLSNSRLELLKHVWASEINTSIKQLYEKVKEGGGLPVLVEMKGFADLTLKMTVKVICGKRHFRV  
AGNVGDHVDADDDDEVIGGRFEKALRDFRLLGDIRVVDVLPFLRWLDFGVGYKKEMENNGRVLDILMEE  
WLQEHKRKRMMGGTEEDFMNVMISKLLNDTKLLSYDADTINKSTCLTLILGASDTTMTLWTWALSLLVN  
HPQVLKRAQDELVDHVGRERQVEDSDIQNLTYLQAIKETLRICPPGPIQAPHEAKDDCTVAGYHVPAGT  
RLIVNTWKIQRDPVWPNPSEFKPERFLTTHVGVDRGHNFELIPFGSGRRSCPGTSFALQVHHLTLARF  
IHGFEFKTPSDAPIDMTESGRITNVKATPLEVLVTPRIPPSGLYV

>SCACYP82-12

MDLLIFSSQLQGTVGLLALLTFSYYVWILIIKRIKTTNTLKV MNKVAAAAAPEVAGAWPIVGHLPQLVGP  
QQLYRILGDMADYGPIMVVRFGMYPTLVSSWEMIKECFTTNDRFLASRPSSAAGKYLTYDFAMFGFSF  
YGPYWREIRKISTLELLSHRRELEFKNVPFTEIDTCIKRLYLQWVRVKNNDHPAAAPVIKVDMSQLLRDLT  
LNTILKLVVGKLFNEKDHGEQEGRKLHLHKTIVEFFKLAGVSVASDALPFLGWLDLDGQKKMKRIAK  
EIDLIAERWLQEHQEKSLSNKLLAAGGGKVDGHDDFMDVLLFILDDDSQFFNFSRDTVIKATSWAMIL  
TAADTTSVSMWALTLLL TNPRVLRKAQDELDMKVGRDRHVEERDIENLIYLQAIVKETLRLYPAAPLGV  
PHEAIQDCTVAGYQVRAGTRVLVNLWKLHRDPVWPNPSEFRPERFLIDDIDEQGGGGGGGGESTAKDF  
RGQHFYIPFGSGRRMCPGINFALQIVHMTLARLLHAFELRTTTSASLMDMTEESGLTMPKKTPLVLLQ  
PRLPLPLYDHHE

>SDICYP82-1

MEFLSLQHQLISIFALLLASIFLYNLLKNHGRKSKTSPKPAPEASGGWPIMGHLNLFNGSELTHQALGSM  
ADKYGPAFNIRFGSHQTLVSSSEIVKECFTTNDRFFSNRPGSLAIKLMFYNADSVGYAPYGAYWRDLRK  
ISTLKLKLSNHRLETLKHLRTSEVESCFKQLYNQWKNKVGGDHDFALVRMDNWFGLTFNVVARIVAGKK  
NFAGGATNGDVGAQRYKEAMDEAFRLMTIFAFSDVVPVSLGWLDKLRGLVGGMKRCGAEIDSIVAGWVDEH  
RLKRASGKGGGHTDLEQDFIDVCLIMEHSTLPGDDPEIVIKSTCLDMILGGSDTTTTVTLTWALSLLLNN  
PHVLKRAREELDTHVGKDRQVDDSDMSNLVYIQAIKETMRLYPAGPLIERRTSEDCEVGGFHVPAAGTRL  
LVNLWKMQRDGSVYKEDPLEFRPERFLTSNADVDLKGQNYELIPFGAGRRICPGVSFAVQLMHLVLRARLV  
HGFEMKTAGDAKVDMTESAGLISHKVTPEVLLKPLAIQAL

>SDICYP82-2

MDSFLLIQWFAASMAALLAFVFLYNLVWSSSRTTKGKNIRKAPMAAGAWPILGHLHLFGSGELPHKMLST  
MAEKYGAFTMKFGKHTTLVVS DTRIVKECFTTHDTLFANRPSTTAFDLMTYANDSVAFTPYGPYWRELK  
KISTLKLKLSNHRLQSIKEIRVSEVNVCFRELYESCKSKTDATPVLVDMKKWFEEVSNNIIVMRVIVGRQNF  
GSKIVQGEDEAVNYKKVMDELLRLASLSMLSDVAPVLGWLDMFQGNKSAMKRNAKKVDTILEGWLEEHRM  
KKSASGISSAGENDQDFMDVMSIIEETKLSGRDADTVIKATCLAMIMGGTDTTAVSLTWIVSLLMNRH  
VLKKAREELDALVGKDRQVEDSDLKNLVYMNIAIVKETMRMYPLGAMLERETKEDCEVGGFQVQGGTRLLV  
NVWKLQRDPNVWTDPTFEFKPERFLNENADIDVGGQHFELLPFGAGRRACPGVSFALQFMHLVLRARLIHGY  
ELGTQNDADVDLTESTEGHVNHKASPLDLLLLTPRLNPNLYDY

>SDICYP82-3

MTIGALALLSFIYFLRVSVIKRKYTNTAVTATNKLENDDEANHSKRVPPEVAGAWPILGHLPLQVVG  
LKQPLFRVLGDMADKYGPFIIVRFGMYPTLVSSWEMAKECFTTNDRVLASRPASASGKYLTYNYAMFGF  
TNGPYWREIRKISMLELLSHRRVELLKHVPSTEIDSSIKQLYHLWENQONQKQGDHQQVVDMSQLLRDL  
TLNIVLKL VVGKRLFNNNDMDHEQDEAARKLQKTMVELIKVAGASVSDALPFLGWLDVDGLKRTMKRIA  
KEIDVIAERWLQHRQKLTNSDKGGSNNIQGGGGDNDFMDVMSIILDDSNFFINYNRDTVIKATSLTM  
ILAGSDTTTTLSLTWALTLLATNPGALRKAQDELDTKVGRDRQVDERDIKNLVYLQAIVKETLRMYPAAPL  
AIPHEATQDCIVGGYHV TAGTRVWNLWKLQRDPHAWPNPSEFRPERFLAVENDCKQQTCDGEANMDF  
RGQHFYMPFGSGRRMCPGINFAIQI IHMTLARLLHSFELRVPEEEVIDMAEDSGLTISKVTPLELLLT

RLPLPLYI

>SDICYP82-4

MAALLPLAFLYNIFLASSSKATSKRTISTKKPPMVAGAWPILGHLHLFKEGELPHQMLKSMADKYGPAFL  
MKFGQHQSLLVSDYRIVKECFTTNDTLFCNRPSTTAFDVMTYANESVAFTEYSPYWRELKISTLKLLSN  
NRLQAIKNLREEEVDVSFKGLYDSWKNKNNKSTAGSVGDERAPVLVDMKKWFEEVSNVIRVIVGKCNF  
GTKIVQGEKEGVEYKTIMDELLRLASLSLLSDFAPILGLLDFQGHVRTMKRNGKKLDVLLQRWLEEHKR  
KKSTPEDEQDFMDVMLSIIIEESKLSGYDADTVIKATCLAMIMGGTDTSAVSLTWIVSLLMNNRQALKKAR  
EELDAQVGKDRQVEDSDLKNLVYLNIVKETMRLYPLGTLLERETKEDCEVGGFHLEGGTRLLVNVWMVQ  
RDPDVWTDPTKFIPEFLTEKADIDVGGGNFELIPFGAGRRVCPGVSFALQFLNLVLRARIHGYELGTPE  
DADVDLTESPEGHVNHKASPLELLLTPRLSNPKLYDY

>SDICYP82-5

MDSHQLLSYQFSASNMFISLFAFVLYLLVWRPTKSNLKMKTISSEDKQAPELAGSWPVIGHLHLLHGP  
NPLHVALGAMADKYGPAFTVRVGVHRTLTVSSWEVAKECFTTNDKVFVSRPRQAAGKHMGYNNAMLRFAS  
DTPYWTQIRKMLKRDLLSNNRIELLNHAWHSEINTSIKELYEMNWSSGEGRRGGIRPPVSDMKQWLGDL  
TLNMSVKMIAGKRCFGSGVSACDEGEARRCQKGLKDFVRLMGQIVVSDAIPFLGWLDLDGYEGEMKRAGK  
ELDRLLGGWLEEHKMKRSPGDEASAQKDWMDLMSVLGDGKLDGYDADTINKATCLALLQGGSIWMTLT  
LLWAFALLVNHHPVMKKAHDELNDHVGREERQVEESDIKNLTYLQAIVKEAMRLYSVSMRLLLESTADCTVS  
GYDVPAGTRLIVNTWKIQRDPRVWSDPSEFHPERFLTHRHRDMDLYGQNFETPFSGRRSCPGSSGLQ  
MVQLTIARLLHGFEFKTPSDAPIDMTESVGVENMVKATPIEVLLTPRLLDEVYAFYN

>SDICYP82-6

FCQFQGVIGILLAFLTFLYYLWRASITGLRTPKHNDKFKVTKAAPEADGAWPIVGHFAQFIGPRPLFRIL  
GDMADKYGSIFMVRFGMYPTLVVSSWEMAKECFTTNDRFLASRPASAAGKYLTYDFAMLSFSFYGPYWRE  
IRKISMLELLSHRRVELLKHVPSTEIDSSIKQLYHLWENQONQNKQGDHQPVKVMSQLLRDLTLNIVLKL  
VVGKRLFNNNDMDHEQDEAARKLQKTMVELIKVAGASVADALPFLGWLDVDGLKRTMKRIAKEIDVIAE  
RWLQEHKQKLTSDKGGSNNIQGGGDNDFMDVMSILDDDSNFFINYNRDVIKATSLTMILAGSDTT  
TLSLTWTALTLATYPLCALRKAQDELDTKVGDRQVDERDIKNLVYLQAIVKETLRMYPAAPLAIPHEAT  
QDCIVGGYHVTAGTRVWVNLWKLQRDPHAWPNPSEFRPERFLAVENDCKQGTCDGEANMDFRQHFY  
MPFGSGRRMCPGINFAIQIHMTLARLLHSFELRVPEEEVIDMAEDSGLTISKVTPLELLLTPRLPLPLY  
I

>TCOCYP82-1

MDLPQPTISTLLAFFSILLFIICYRLLSTKSDKRSSSRNKPLDAPGAWPIVIGHLHLLNGVIQHEILGT  
MADKYGPAFTIWLGTRPALVVSNEWVAKECFTTCDKALASRPPSLALKIMGYNDALFAFAPYGQYWRELK  
KIVMIELLSSRQLDSLKHVWDEIDSCIEDLYEKCKGHRETVLVNMKQWFADLMMNVVVRMVVGGKLNFGK  
TKEGDDEVAKAHQGQLKAMREFFKWVDVFMIEDAFPILTDLDPQGYQRKMKNIAKDLDSLQVQWLDEHKL  
KQKTGDNGKDFMDIMLSAVKDASISDRDDETICKATCLNIILGASDTTTLTWTLSLLNNRHVLRKA  
QEELQAQVGKHCVEESDVKNLVYLHAIKEVLRLYPAVPLLGPRESVADTVVAGYHIPAGTRLIVNLWK  
IHRDPLNWPDPLEFRPERFLTTHKDTDVWGQNFELTPFGSGRRICPGISFALQVIPLTLARLLHGFELTT  
PGSAPVDMTESTGLTNLKATPLDVFISPRVL

>TCOCYP82-2

MESIPTAINVLLAFVSIYYLLKFRKKIITTTTRDIKKIKAPELKGAWPIIGHLHLFRSDDLHRKLGAMAD  
ELGPAFMIRLGMRPALVVSNEWQTAKECFTTKDRIFATRPDSVAAKHMGYENLILGFTRYGPYWREVRKIV  
TLELLSSHRLHLLRHVRRISEIDMSIKKLHQLCTSDNKNYSSVVVDLNQWFKALTLNIIVRIIAGKRYGG  
DLEDDEESRRWKKALNEFMHLFGIFSVSDAIPQLQGMVQGHHERVMKRTGKDIDVILSKWLEEHRRKKIR  
VNREGAEKDFIDIMLDLIKENVNISGHADNVVKATCLALVSAGSDTTMITLTWAVSLLNNHRVLEKAQ  
AELDNQIGINRVHVEEEDIKNLPYLQAIVKETLRLYPAAPFLPHEAMEECTVAGFHVPGKTRLITNIWK  
LQRDPQVWEDPLEFRPERFLTSDRRHVDVFRGQHFELIPFGSGRRMCPGISFAIGVLHLTLARLLHEFHG  
TPTNAPIDMNNENPGITLAKADPLHPLVSPRLTSINY

>TCOCYP82-3

MDSQLTSFQSKPSAYLIAALLALVSAYYLIKKKSRATYQDNYGKIRAPEPKGAWPIIGHLLLFKPNDVL  
YQKLSLDELGPAFMIRLGMRALVISNWEIAKECFTTNDRIFATRPKLMASKHMGYGGAEVGVAPYGP

YWREVRKIITVELVSNHRLNLLKDVRRISEIDMSLKELYDLCMKKKKNGSGEESSRVELDLYQWFKDMSLN  
ILVKLIAGKRYYGVAANAANEDDEESRRWKKATEESVFLFGQFVVGDAIPLLEGVDVQGLERAMKKTGKEID  
AVLSKWVEEHRMKKQQLNGARDEQDFIDVMLNIIKDGKISDHDADTIVKATCMSLVQAGSDTTMLTLTWA  
VCLLLNNCNVLEKAQAELDDQIGRSKGRIVEEDDIKLPYLQAIVKETWRLYPPAPLAVPREAMEDCTVA  
GFHVPKGTRLMNTNIWKLHRDPKVWDDSLKFRPERFLSSEHAHVDFRGQHEFMPFGSGRRMCLGMPLAIG  
VVHLTLARLLHEFELATPSNAPVDMSEKAGLTLVKATPLNVLIAPRLC

>TCOCYP82-4

MDSIILQSNLLTTVIIITSFGLFVLSFYVVLWKAIRTGKRNCSNPKAPEAAGGWPILGHLHLFRGQGLL  
LHKIFGAMAETHGPAFTIRLGMRPALVVSNEWAKECFTANDRALASRPTSLALKIMGYNSLFAFAPYG  
QYWRELKRIVMHQLLSSRRELELLKNVWLSEIDIWIKGLYENSLVNVKVVDMKQWFGELMMNIVVRLVAGKR  
SFGKIREGDSEEAQAHQRQIKALRDFRFLVEVFMIEDAFPFLTWLDPRGYQKEMKNIKELDYLLLEEWLE  
EHKLKQQAACDDQSKDFMDVMLSEVKDSTITERDANTICKATCLNVILGASDTTTLTLTWALSLLLNNRH  
VLKKAQEELNAQVGKDKQVEESDMKNLVYLHAIKEVLRLYPAAPLSVAHESLEDTVVAGYHVSKGTQVI  
FNLWKIQRDPSVWSNPLEFQPERFLTTHKHVDIWGQNFELIPFGSGRRMCPGVPFALQVVSLLTLARLLHG  
FELTTPGGAADVMTETPGLTNMKATPVEVFLRPDLPHQLYA

>TFLCYP82-1

MPSQTIQIIMDFHQCVAITILFCVLASPPFFYYLLPWWKNANDHDLAKSRGKPVPEVDGAWPIIGHMHML  
QPSDSFYSSLAEKYGIPTLRIGLCKTIVINSWELAKECCTTHDRVFASSPEATAAKILGYDYAMFGRNP  
YGPYWREMRKIIITELVSNRRELELLKHIVTEISTSIQELYQLWEARSSKNVKERVVDMQKWFGLMLN  
IGVEMVAGKRYFGASSNEDKEEARQLHKTFFKDFSNLFGVPVLSDAIPFLRWLDYKGHIKAMKRCQVDC  
ILHRWLEEHKQNKTTIAGDFMDILLSVLQDKEIFGRDADTVIKATCLNMMLGVVETNKVVTMALISLLN  
NRRILKKAQEEIDIHVGSQKQVEESDIEKLVYLQAIVKETRLRYSPGLGTREPSDCTISGFHVPKGTEV  
MVNVQQIHRDPSIWSNPLEFQPERFLTQANIDFGGQHHEYIPFGAGRRLCPAISFAVLVVHLTLARLLQ  
GDFATPKDAPVEMNESVETLEVLITPRLPLHMY

>XSICYP82-1

MHNPIPNQWLPSTLLTPIIVSFLVIVLFYIYKKRSSNTIRTKKAPEVVGAWPVIHGLNLFSCPKPGHIV  
LGELADQYGPAFTIHFGMHPTLVVSSSELVRDCFTTNDKLFSSRLVNKAIKYMFDQDTISFAPYGPYWR  
ELRKMIALNLLNNERIKMLQQQRISEMDACLKLYDLSAKRKDENAGVLVDMSKWFAEISFNVVTRIVAG  
KHIFGPKVERYKNVMEEARLMDVMVFSMVPYLGWLDRLRGVDSAIKRTAKELDSVLESWVEEHRKSV  
SISAGTGGIFNIKEEELDFIDIMLSIIAKNNLPGDDPDTLKAIVQETYLAAWDNTTTLTWVLCLLL  
NKQVLKRAQNELDAQVGKERQVEDSDINNL PYVQAIKESLRLYPPGPIIERATTEDCNVGGFRVPAGTR  
LWVNLWKLQRDPKVPNDPLEFRPERFLNDNADIDLRGQNSELIPFGSGRRMCPGVSFSLQVIHLVIARI  
IQGFELKAPTADIDMSTTLGMISWKATPLEVLMNPRFPPVFK

>XSICYP82-2

MSTLQISILTVKSPYSQMHHYPLLHQWLPASMALVSLLVIIILFSIFKKRSSKMIKAKKAPEVAGAWPLIG  
HLNLFSGPKLLHLVLGELTDQYGPAFMIHLGMYPTLVVSNWELLKDCFTTNDIFFSNRPVNKAIKHMFYN  
KESIGFTPYGSYWRELKMTTLKLLSNHRLDLLKPLRISEMDACFRNLYELWTKDKDGNALLVDMSKWF  
GEISFNVARIVAGKKNFGSKGDRYKTMEEVRLMGLRALSDAVPYLGWLDQLRGLDSAMKRAAKELDS  
VLESWVEEHLKRVSVSAGTGSTVKTAKEEEEEDFIDITLSILAENQLPGDDPDTGIKSLILDMILGGS  
DTSTVTLIWAMCLLLNNVHVLKRAQYELDAQIGKERQVEDSDIKNLPYIQAIKETMRLYPAGPIIERQA  
NEDCDVGGFHVPAAGTRLWVNLWKLQRDPNVWKDDALEFRPERFLTDHADIDLKGQHELEIPFGSGRRICP  
GISFALQVMHLALARIHGFELKTPNDSNIDMSGTPGLLCCCKATPLQVLLTPRFNPMFYK

>XSICYP82-3

MDSLRLHCLGGILALLIFLGYLQWKRGTSNKCIEAPQPDGAWPIIGHLPRLMKPQIMHRTLSTMADKHGPA  
FTLRLGVHKTLLVSSWEVAKECFTTNDRVFATRPTSIAVEILGYNYALFAFGPYGSYWREARKIAILELL  
SNHRELELLKHVRRISEVSTSIRELYQVWKENDIANGSALVDMKPFGLTLNVVVRMVGAKRYMGGSVKS  
DDVEGRRFQKATKDLFDLFLGFLISDALPFMGWLDLHGKAMKKTAKELDSIMQRWLEEHRQSLDDGT  
KEEKDFMYVMLSILEDKFLQYDADIVNKAICMNMIMAGTDTQMITLTLWVLSLLLNNRHILKKAQDEID  
SSVGKDRQVEESDIVKLVYLQAIVKEALRLYPPAPLSAQHEAMEDCTVAGYVVPAGTRLITNIRKIQRDP  
RVWSDPFEFHPERFLTQANVDFRGQSFEPFGSGRRMCPGISFALQVVHLTLARILQGFDFETPMNAS



VDMTEAPGLTNVKSTPLQVLITPRLHPNLY

>XSICYP82-4

MDLLNPYFATIFGGFFALLIFLFIISQKRSRIPKIRAAPEVPGAWPIVGHLPMLLGPRLPHFVLGDLGK  
YGSFTLRLGIHKTLLVSSWEVAKECFTTNDQVFATRPSFMAAKIMGYNYALFGLAPYGSYWRELKIS  
IELLSSHRELLKHVRVSEVSTSMKELYEVAENCSNGNSVLVEMQRWFGDLTLNISVRMVAGKRYFGT  
SASLDDDEARRISKATKDFRLLTGMFVSDSVPFLWLDLDFQGHEKAMKRTAKEMDDIFGGWLEDHRRNKL  
AGGTKVQQDFMDVMSILEDEKFFGYNADVVTKATCLNMLLGGTDTTMVTLTWALSLLLNNRHILKKAQT  
EINTHVKGDTQVDESDIVKLVYLQAIVKETLRLYPAAPLSTPHEATKDCTIAGYHVTAGTRLITNIWKIQ  
RDPRVWSNPSEFQPERFLTDQANVDVRGQHFEPFPGSGRRSCPGISLGLLVVQLALARLLQGDFDFETPS  
DALVDMTESAGLTNLKATPLHVLITPRLHSSLY

>XSICYP82-5

MDSVHQGQYLPTPMVSFVFFISLYFLIVWKTRSSSKTNTCNEVPEAPGAWPIIGHLHLLGGSELPHKTL  
GAMADKYGPIFKIRIGVHQALVVSSDIVKECFTTNDKVFASRPTSTASKILGYDYVMFGFSPYGPYWIE  
LRKIIMSELLSNRRLELLKHVRDSEIDISIQELYKVKNHDKSKGPILVDMKQWFGDLALNVILRMIAGK  
RYSGSIFSSDETEARRCQKGARDFRLLGLFIIEDALPYLSWFDLQGYKKEMKNTAKELDSVFQRWLEEH  
KRTRETGELNREQDFMDILMSTLEETKISEYDNDTIIKSTCLSIVTGGNDTTMVTLTWILSLLLNNKHAL  
KKVQDELDSHVGKRRHVEESDIKNIYLAQIMKEALRLYPAGPLSGPRVADADCTLAGYHIPAGTRLLVN  
TYKIQRDPLVWSEPFERPERFLTSHVNMDVKGLQYELIPFGTGRRACPGMLFALQVVPLVLARFLHEFE  
PKTEMDMPVDMTETAGLSNAKATPLEVVITPRLQPELYSL

>XSICYP82-6

MDFTMIIQWLLTSFAILVAFVLIWSSATRSTRKRNKTAPVAAGALPIVGHLMHLMGRELPHRLLSNMAD  
KYGPAFMMKYGLQPALVVSSKLTKECFVHNDRAVFKRPRSKALKNLTYDQASLGFAPYGPLWEMRKVS  
KTNLLSNQRLQMQRHVRASEVDAFIKELYDLWSSKSNNIKGAPLLVEMNKWFEELALNVVTRMLSGKRHI  
GFKARRGEDSESMHYKKVVVDATLLTAKLVVSDFFPSLGLVDYLQGEDESSIKGTSKELDAILATWVEEHR  
HKKVSGSEDEKDFIDLTLMSIDQTHQGADVDTFIKSMCVGMIFGGSDSTSVALAWALSILMNNRPVLK  
KAREEIDRQVGRDRKVNLDVLDYLAIVKESMRLCLVGPLLERVAVEDCEIGGYHVKAGSRVVVNIW  
KMQHDPNLWSDPLEFQPERFLTANANVELRGQHFELLPFGAGSRICPGITFALELIQLTLARLIHGFE  
LTPMDADVDMTETSSVTNYRATPLEILLTPRLDPKLYNY

>ECACYP82B1

MEKPILLQLQAGILGLLALICFLYYVIKVSLSRNCNQLVKHPPEAAGSWPIVGHLPQLVGSGLKPLFRVL  
GDMADKFGPIFMVRFVGYPTLVVSTWEMAKECFTSNDKFLASRPPSAASSYMTYDHAMFGFSFYGPYWRE  
IRKISTLHLLSHRRELLKHVPHTIHNFIKGLFGIWKDHQKQQPTGREDRDSVMLEMSQLFGYLTLLNV  
VLSLVVVGKRVNYHADGHLDDGEEAGQGQKLHQTITDFFKLSGVSVASDALPLGLFDLGGKESMKRVA  
KEMDFFAERWLQDKKLSLSSETNNKQNDAGEGDGDFMDVMSILPDDDDSLFTKYSRDTVIKATSLS  
MVVAASDTSVSLTWALSLLLNNIQVLRKAQDELDTKVGDRDRHVEEKIDNLVYLQAIVKETLRMPYAGP  
LSVPHEAIEDCNVGGYHIKTGTRLLVNIWKLQRDPRVWSNPSEFRPERFLDNQSNGLLDFRQHFYIP  
FGSGRRMCPGVNFATLILHMTLARLLQAFDLSTPSSSPVDMTEGSGLTMPKVTPKLVLLTPRLPLPLYDY

>ECACYP82N2V2

MDSLMLAYLFPISVASIIAFVFLYNLFSSRTLKNKIRTPMATGAWPVLGHLHLFGSGELPHKMLAAMA  
DKYGSFAFRMKFGKHTLLVSDTRIVKECFTTNDTLFSNRPSTKAFQLMTYDNESVAFTPYGSYWREIRKI  
STLKLKSNHRLQAIKDVRASEVNVCFKTYDQCKNPSGSAPILIDMKKWFEVSNVVMRVIVGRQNFSG  
KIVQGEAAIHYKKVMDLRLASLSMFSDFAPLLGFVDIFQGNLSAMKRNAKKVDAILENWLVEHRKKK  
NSVAESQQDFMDVMSIIVEESKLSGHDADAVIKATCLAMIMGGTDTTAVSLTWIISLLMNNRHALKKARE  
ELDALVGKDRQVEDSDLKNLVYMNIAIVKETMRMYPLGTLLERETKEIDGFHVKGGRLLVNVWKLQR  
DPNVWVDPTEFRPERFLTENADIDVGGQHFELLPFGAGRRVCPGVXFALQFMHLVLARLIHGIDLNTLNE  
ENVDLTESPEGHVNHKASPLDLILTPRLHYKLYE

>NTACYP82E4v1

MVFPIEAIIVGLVTFVFFLWTKKSQKPSKPLPPKIPGGWPVIGHLHFHNDGDDRPLARKLGLADKY  
GPVFTFRLGLPLVLVSSYEAVKDCFSTNDIAIFSNRPAFLYGDYLYGNNAMFLANYGPYWRKNRKLVIQ  
EVLASARLEKFKHVRFARIQASIKNLYTRIDGNSSTINLTDWLEELNFGILVVKMIAGKNYESGKGDEQVE

RFKKA FKDFMILSMEFVLWDAFPIPLFKWVDFQGHVKAMKRTFKDIDSVFQNWLEEHINKREKMEVNAEG  
NEQDFIDVVLSKMSNEYL GEGYSRDTVIKATVFSVLVDAADTVALHINWGMALLINNQKALTKAQEEIDT  
KVGKDRWVEESDIKDLVYLQAIVKEVLRLYPPGPLLPHENVEDCVVSGYHIPKGTRLFANVMKLQRDPK  
LWSDPDTDFPERFIATDIDFRGQYYKYIPFGSGRRSCPGMTYALQVEHLTMAHLIQGFNYRTPNDEPLDM  
KEGAGITIRKVNVELIIPRLAPELY

>PSOCYP82X1

MELFIKLPFIQPIPFISIILVTTVSIVLLYSVFFWVTDK KKKRKKAPNAAGAWPLIGHLRLLMNDKEPLYR  
ALGSMADKYGPAFNIRLGNQEVLVVSNWEMVKQCFGNQNDKLF SNRQTTLA AKYMLNQTSSGFAPYGPY  
WRELKIMVQQLLSKQSLESWKHLKIKEMDASF SKLNELCNNNGTGATLIRMDWEFAELTFNVIARNVF  
GYQSGGRSTAL TNGD TESKGERYKKTLEEALHLSIFAVSDIFPSLEWVDRLRGLIRNMKRF GDELNSIA  
GCLIEEHRQKRLQSVSKSDKGVGDEQDFVDVLLSVAEKSQ L PGDDPDLVIKSMILEIVSGGETTSSTLT  
WALCLLLNHPHVLKKAKEELDTHVGKDRHVEESDTPKLVYINAI IKESMRLYPNGAMLDRLALEECEVGG  
FHVPAGGRLFVN VWKIQRDPSVWENPLEFKPERWFLSNGEKMDVDYKGNHEFIPFGIGRRMCAGMLWAS  
EVIHLVLPRLIHGFDMKAASANGKVDMAEMAGMVICFKKTPLEVMVNPRE

>PSOCYP82X2

MKSLMMNKLLFLQRITDSPSTTIISTFIVTIIISIVFLYTVLLIRTTKNKQKIAAPKASGAWPFIGHLKLF  
MKQDTQFYRTLGTMSDKYGSVFTLRLGNQAILVSNWEMVKECFTTNDKSF SNRPSTLSTKYMLNDTNSV  
VFSPYGTYWREMRKILVQKLLISNQRSEALKNLKTKEIDNSFVKLNDLCNNDVSGGGTKVRMDEWLADMM  
FNIIARITFGYQSGGDAPGASTTSKNVERYKKTLEMFVVLATRF AVSDIFPSLEFIDRLRGLVKDMKI  
LGDELNSIAGCFIEEHRQKRRESLSSLLSLSNESVGDEQDFIDVLLS IMDQSRLPGDDPDFI IKIMILEA  
FAGGTDLSATLTWVLSLLL NHPNVLKRAREEIDRHVEN GKQVEVSDIPKLG YIDAI IKETMRLYPV GAL  
SERYTTEECEVGRFNPAGTRLLVNIWKIHRDPSVWENPSDFQPERFLCSDKVGVDLYGQNYELIPFGAG  
RRVCPAIVSSLQTMHYALARLIQGYEMKSASLDGKVNMEEMIAMSCHKMSPLEVIIISPREPRS

>PSOCYP82Y1

MAYLMIKKSIIYFFDQPTAVGTLILAFLLT LSPVIIYYEQKKRGLRRNRTAITTTPLPEASGAWPVIGHL  
LLFMNENDLNHVTLGHMADKYGPIFSLRFGRHRTL VVSSWEMVKECFTGTNDKLF SNRPSSLAVKLMFYD  
TESYGFAPYGKYWRELKISTHKL LSNQLEKFKHLRISEVDNSFKKLHELCSNNKQGGDTTYVASLVRM  
DDWFAYLTFNVI GRIVSGFQSN AVAGATNSQEKYLAIDEVSNLMATFAVSDVVPRLGWIDRLTGLTGKM  
KNCGKKLDAVVGDAVEDHRQK KLSRNN TGALTEHEEEDFIDVCL SIMEQSQIPGNHPEISVKSIALDM  
LSGGSDTTKLIMTWL SLLL NHPDILDKAKEEVD TYFGKKKISDNTPV VDAADVPNLVYIQAIIKESMRL  
YPASTLMERMTSDDCDVGGFHVPAGTRLLWNVWKMQRDPRVWKDPLVFLPERFLSNDKGMVDVKQNYEL  
IPFGTGRRICPGASFALEVLHLV LTRLILEFEMKAPEGKIDMRARP GF FHNKVVPLDVQLTPRTL D

>PSOCYP82N4

MRTESIKNRPMDLLLQYLQPI SVALVVIALVWNYGRRNPTKKLAP EASGGRPIMGHLHLFNDGELTHRK  
LGAMADTYGPVFNIRFGSHKTLVVS DWEIVKECFTTNDKLF SNRPGTLGIKLMFYDADSVGYAPYGAYWR  
DLRKISTLKL LSNHRIDTIKHLRSSEVESCFESLYSQWNGEKSGEFAPVRMDSWLGD LTFNVVARIVAG  
KKNFSANGDVGAQRYKAAMDEAMRLMRFFAFSDVIPSL SWLDNLRGLVREMKKCASEIDSIMATWEEHR  
VKRNSGGNSQLEHDFIDVCLDIMEHSSLP GDDPDLVVKSTCLDMILGGSDTTT VTLTWAMSLLLNHPQVL  
QKAKEELETQVGKNRQVDDSDIPNLPFIQAI IKETMRLYPAGPLIERRT MEDCEVAGYQVPAGTRLLVNV  
WKMQRDGNVYKGDPLEFRPDRFLT SNADV DLKGQHYELIPFGAGRRICPGVSFAVQLMHLVLARLLHEFE  
ITTVPEPKVDMAESGGLLCYKIMPLEVLIKPRLEI

>PSOCYP82N3

MDFSSLLLLLNTWISAYSMAALLALVLVYNLRMTKSSSSKTTSLKGKKIITRPPAVTGAWPVFGHLHLF  
GSGEHPHEMLS KLAEKYGPSFTMKFGKHTTLVVS DTRVVKECFTTNDTLFSNR PSTIAFDLMTYATDSIA  
FTPSPYWRELKISTLKL LSNRLESIKQLRTSEVSVCFKELYDL TNKKN DNGAPVPIDLRWFDEVSN  
NVIMRVI FGKQNF GSKIVLGEDQEA VHYKKIMDELSRLSSLTMLS DMVPLLGLWLDYFKGDLRAMKRNGKE  
LNSILQKWLEEHKSKKSSDARQDFMDVMLSISKDTQLYGHDQDTFIKATCLAMIMGGTNSTEVALTWILS  
LLMNNRCALHKAREEIDLLVGKDRQVEDSDVKNLTYMNAI IKETMRLYPLGFLERDTKEDCEVSGFNIK  
GGTRLLIN VWKLQRDPNVWTDPMEFKPERFLTENADIDVGGQH FELL PFGAGRRVCPGVSFALQFMHLVL  
ARLIHGYDMETLNGEDVDLSVSSGGHVNIKSTPLELILTPRLHPELYDCET

CYP719

>HSACYP17A1

MWELVALLLLTLAYLFWPKRRCPGAKYPKSLLSLPLVGSLPFLPRHGHMHNFFKLQKKYGPYISVVMGT  
KTTVIVGHHQLAKEVLIKKGKDFSGRPQMATLDIASNNRKGIAFADSGAHWQLHRRLAMATFALFKDGDQ  
KLEKIICQEISTLCDMLATHNGQSIDISFPVFAVTVNVLICFNNTSYKNGDPELNVIQNYNEGIIDNLS  
KDSLVDLVPWLKIFPNKTLEKLSHVKIRNDLLNKILENYKEKFRSDSITNMLDTLMQAKMNSDNGNAGP  
DQDSELLSDNHILTTIGDIFGAGVETTTSVVKWTLAFLHNPQVKKLYEEIDQNVGFSRTPTISDRNRL  
LLEATIREVLRPVPAPMLIPHKANVDSSIGEFVAVDKGTEVIINLWALHHNEKEWHQPDQFMPERFLNP  
AGTQLISPSVSYLPFGAGPRSCIGEILARQELFLIMAWLLQRFDLEVPDDGQLPSLEGIPKVVFLIDSFK  
VKIKVRQAWREAQAEGST

>AMECYP719-1

MEEKIMTNNSPWILTSSTTTTTILLLSLLFTIFIIILRRNKSSSSKMVWPTGPKTLPIIGNMNILGGTALH  
VVLHNLAKTYGNVMTIWIIGSWRPVIVVSDIDRAWEVLVVKSSDYSARDMPEITKLATADWKTISSSDSGP  
FWTNLRKGLQNVALSPQNLSSQSKFQERDIIKTIQNLKEEAKMNNGIVKPLDHLKKAMVRLISRLIYGQD  
FDNDEYVEEMHHTIEELIRVSGYARLAEAFYYAKYLP SHKKAVREVLQANQRVQNLVRPLLSLNSPTNTY  
LHFLRSQNYEDEVIIIFAI FEAYLLGVDSTSSTTAWALAYLIREPNVQEKLYEELKNFTNDNDRKMVKFED  
LNKLQYLQAVVKETMRMKPIAPLAIPHAKRETSLMGRKVNQGTRVMVNIYALHNNQNVWKEPYKFNPER  
FLQKNQDGDGKAMEQSLLPFSAGMRICAGMELGKLQFSFALANLVNAFKWSCVSDGVFPDMSDQLGFVL  
LMKTPLEAGIVPRM

>AMECYP719-2

MPDITKIISANWKNISCSDSGPFWHNLKGLQGVALTPLNVASQYHLQERDMKNLINSMYK DASQKNGIL  
KPLDYLKEETVRLLSRLIFGQDFQDENLVVGMHHALDDLVRISGYASLADAFKFCENLP SHKKSIREVHE  
VKKRVENLIRPHIVSNPPTNTYLHFLKTQDFNEDIIISAILEVYDLGVDSTASTTVWALTFLVREQEIQE  
KLYREIVNVTGGKRSVKVEDVNKMPYLQAVMKETMRMKPIAPMAIPHKTSKETSMLGKKINKGSMVIMVNL  
YAIHNNPKVFPPEPYKFNPERFLKDVNSDES LGNIKTMESSLLAFSAGMRICAGMELGKLQLAFLGLASLVH  
EFKWSCSVDGKLPDLSEDHCFILLMKNPLEAKITRRIH

>BTHCYP719-1

MEFTVWVVGFNVLVVVAMTMFLLRTKSSSSTTKWPIGPKKLPPIIGNLHQLGGDVLHVALAKLAKVHGGIM  
TIWIGSWRPVIVVSDIDKAWAVLVNKSSDYSARDMPEITKIASASWHTISSSDSGPFWQNLKGLQNGAL  
GPANISAQSQLQERDMKRMIGDLQKEAKINGGIVKPLDHIKKATVRLLSRLIFGHMFDDDSFIESMHHEI  
EDLIRISGYARLAEAFSYAKYLP SHKLAVKEAYEVKHRVEQLVRPLLTSSPPANSYLNFLLSQDYSEEVI  
IFCIFEIYLLGVDSTSSTTTWALSFLIHEQQVQEKLYQSIKGVTSDDDGLVKAEDLSKLQYLQAVMKETM  
RIKPIAPLAIPHAKASKDTKLMGTVKAKGTRVMVNL YALHTKENIWSDEPKFKPERFLHGDEGANVKAMEQ  
CFLPFSAGMRICAGMELGKLQFSIALANLVKAFKWSVVDGELPDMSEELS FVLLMKTPLEARIIIPRHL

>CCHCYP719-1

MVNAVAEILTEKPWLLPATLLAVIAIAKFFLGKSSTMKWPIGPKKLPPIIGNMHQLGGTDLQVVLANLAKT  
YGTIMTIWVGSWRPMIVLSDIEKAWAVLVNKSSDYSGRAMPEITEIISAKGKTISTSDSGPHWSNLKGL  
QNVALSPHNIAAQSRFQESDITKMIKTLKQEAASNNGIVQPLDHLKKSTVRLISRLIFGQDFDDDEYVEA  
MHLAVEELIRVSGYARLAEAFYYAKYLP SHKRAVSEVWEANRRVKRIVKPRLSANPPPNCYLHFLSSQDY  
SEEMIIIFAI FEAYLLGVDSTSSTTAWALGFLIREPKVQERLYQELKNCAGENGLIKVEDINKLPYLQAVL  
KETMRMKPIAPLAIPHAKAVRETS LAGNKVEPGTRVMVNL YAIHNNPKVWIDPHKFKPERFLQGEENGGN  
LKLMEQSLLPFSAGMRTCAGMELGKLQFGFSLANLVNAFQWDCAKKGMFPDMSDLLGFVLLMKTPLQAKI  
VPRGSPSINGY

>CCHCYP719-2

MVAAVVEILKEKAWLLPTTLVAIIAIAKFLAKSSTVKWPTGPKKLPPIIGNMHQLGGTELQVTLTRLAKT  
YGNIMTIWVGSWRPMIVVSDIEKAWAVLVNKSSDYSGRAMPEITQIGSANWKTISTSDSGPHWSNLKGL  
QNVALSPHNIAAQSRFQESDISKMIKALKQAAVANNGIVLPLDHLKKTTRVRLISRLIFGQDFDDDEYVEA  
MHLAIEELIRISGYARLAEV FYYAKYLP SHKRAVDSAWEVNRTVKRIVKPLLLVKPPTNCYLHFLTSQDY

SEEVIIIFAILEVYLLGVDSTSSTTAWALGFLIREPRVQEKLYQELKNFAGENGMIKVEDINKLPYLQAVL  
KETMRMKPIAPLAIPHKAVRETSLAGNKVEPETRVMVNIHAIHNNPEVWMDPYKFKPERFLQGEDINGGG  
NLKLMENSFLPFSAGMRICAGMELGKLHFGFSLANLVNAFQWDCAKKGGKLPDMSDLLGFVLFMKTPLEAK  
IVPRGSSSNINGY

>CCHCYP719-3

MEESFWIVSATIVVVFVIATMFRKSSSISSTKEWPAGPKKLPVIGNLHQLGGDVLHVLANLAKVYGTVM  
TVVVGSWKPMIVISDIDRAWEVLVNKSNDSYGRDLPEITKIIISANWKNIMTADAGPYWTSRKGTLTGHTL  
APTNVASQSHLQEKDMNNLINRMKNQAASNNGI IKPLDHLKEETVRLLSRLIFGQHFEDHFVEGIIHQAL  
DDLVRISGYASLADAFKFCENLPSHKKSISGVHEILSRVRNLVRPYIVPNPPTNTYLHFLQSQKFTTEEVI  
IACILEVYDLGVDSTAATTWALTFLVREPEVQEKLYREIQTIVIGDRGTVKVEDISKMTYLQAVMKETMR  
MKPIAPMAIPHKAVRETTLMGNKIDKNTVVMVNLVYAIHNNPKVFPEPYKFRPERFLAGGDGKFGNLKAME  
QSLLPFSAGMRICAGMELGKLQYGFALASLVNAFNWTCTADGKLPDMSDHC FILLMKNPLVARIIPRVN

>CMACYP719-1

MEEINVEWISTAATTIGIIVVVFATVSMFMGRRRKSMMKWPNGPKTLPIIGNMHQLGGTALQVVLHKLAD  
VYGSVMTIWIWGSWRPVIVVSDIDKAWWEVLVNKSSDYSARDMPEITRINTANWSTISTSDSGPHWSNLRKG  
LQNVALSPLNVAASQSFQEKDINQVIKLNQEESALNGGIVKPLDHLKATVRLLSRFIYQGNFDDDTYVE  
NMHNEIEELIRISGYARLAEAFYYAKYLP SHKKVEKAVEEAHYRVKALISPFLTRNPPNSYLHFLRSQN  
YP EEV IIFCIYEVYLLGVDSTSSTTAWALAYLVRESAVQEKLYQELNFIQDRQMGSAIKVEDVNKLQY  
LQAVMKETMRMKPIAPLAIPHKACKDTSLGGNKVDKGTVMVNLVYAIHNNPKVWNEPNRFKPERFLQLKD  
KKEMEQSYPFSAGMRTCAGMELGKLQYGFALANLVYAFQWSCVADGKPPDMSDLLGFVLFMKTPLEARI  
VPRVR

>CMACYP719-2

MEESFWLVAATVLVVFVAKLLFRKSSSISTMEWPAGPKTLPIIGNLHQLGGAALHVLANLAKVYGSVM  
TIWVGAWRPMIVISDIDKAWWEVLVNKSSDYSARSLPEITRIISANWKNIMTSDSGPFWQNLRKGLQGGAL  
SPHNVM SQYQLQERDMQNLIKTMRVEASKNNGRIKPLDHLKQETVRLLSRLIFGQDFNDEKL VVGMHHAL  
DDLVRISGYASLADAFKVAENLPSHKKSIREVHELKRRVENLVRPHIVSNPPTNTYLNFLLSQNFSEDLI  
ISAILEVYDLGVDSTASTTWALTFLVREQVQEKLYQEIKNL TGGRSTVKVEEVSKMPYLQAVMKETMR  
MKPIAPMAIPHTAARETSLMGKKIDKGTVMVNLVYAIHNNPNIFPEPYKFMPPERFLHGEEQNGGNIKEME  
QSLLPFSAGMRICAGMELGKLQYGFALASLVNAFKWECAADGKLPDLS DHC FILLMKNPLEAKITPRTH

>CMACYP719-3

MEGSLWIIILSILVGAVMILVQNLWKRWSKTSDEMILPPGPRKIPIIGNLYQLNRGGELIHVALAKLAQEH  
GKMMTIWFGGGQPSIVVSHHEVAWEVLVTKAADYSSRTL PFM SRVTSADWHTLATS NLGPFWQTLRKG LR  
STTLNPH TISAQVQLQEEDVTRMILSFKEQA CLNDGVV KPLIPLRRTTVQLIGRFCFGPEFKND DDFVEE  
MDIVIEDV ISLTGHGR LIDIFEFTRYIPGLNLPFKQAYKVKQRIIE LIRPYIDYHKSSKSPCNCYLHFL  
LSHDYDEEVITFNL FELFLLAVDSTSNATAWALAYL IHDQKIQQKVYDEVSEFGRKEMVTIEEVSKLK YV  
NAVVK EIIRMKPIAPLAVPHQADRDSKLMGIQVKKGTPVLVNLVYAMHYDPSIWI EPSRFMPERFLVGH PQ  
NVHCGEDHMAVMERSLIPFGAGRRICAGMDLAKLQVALTIANLVNSFQWSSAVEGQLPDLTEDLTFILRM  
KTPLAARIIPR

>CMUCYP719-1

MDQTNILLAVAAALFIGLLTKLLASNSKHHLPPGPKPLPIIGNMLELSKGGELLHVSLAKLAERYGEIMS  
FWFGGFEP SIVVTSHEL VWEVMVTKANDFSDRALPWLTKILTSNWQTLATCDLGPYWYSIRKGLQSTTLN  
HQTIMSQTQLQERDIADLLTSLEQEASSNNGIVKPYPM LRKLMVRLVSRFCFGPDFPNDEEFVERMDSTL  
DESIHQSGHTRLADLFEFTRYVPGLWGPFKESLKRRIVNLTPHLKAASSPNCYSSLLL SKGLSEEVV  
VLNLYELFELAVDATSNTTAWALAFI IHNKDAQEKVFKEVRYNQVGERRKIIRVEELGEMEYVQAVAKET  
IRMRPIAPVMPHKAARDGELKGVKVRGGTPVLMNFYAVLHDEKVVREPYKFTPERFTTKGVDAEAMERSY  
VSFGVGRRSCPGMELAKIQIAVTVANLVNRF EWCSAAEGELPDLSEGLTFVLM MKTPLVARIVPRSY

>CMUCYP719-2

MDVHYSTLLIALATLASLLLLSKLLRSINTSKHHQWPPGPNKLP LIGNLHQFRGDLLHQNFAELAQKYG  
KLMTVWIGSQQPFIVVTPDLAWEVLVTRAVDYWSRQMLYLSRIISAGNRTLATS DGGPYWETLRRGLQS  
TALSPQTISSQTKLQEODIAHMIASLQEQEASLNDGLVKPLPHIRKLAIRLLARL CFGADFPNDEHFVERM

DELLEDDMRLLTAAGLVDFEFTRHIPGLTPRLKEIEDHMEGIKGLIRPCLAAAMKKKGNISISLGNTHMN  
FLISQGFTEEIIILNLFEVFGVDSTISLSWALGFLIDGRETQEKVLKEIVSKLGGRRVVGVDVSG  
MEYVHAVVKETLRMRPVAPMAVPHKAARDSELMGFKVKEGTPFFVNLALHNEKAWKDANKFVAERFVK  
GDGAEELKMKERYYPFGARRACPGMELAKVHLAMVVANLVNSFEWQSAVEGQPLDLSETLNPLLVMK  
TPLVARLVPRFA

>ECACYP719-1

MEEMKILMNNPWILTATATLLISIFLFFTRKSSKMVWPAGPKTLPPIIGNMHLLGGTALQVVLHNLAKV  
HGSVMTIWIWSWRPVIVVSDIERAWEVLVNKSSDYSARDMPDITKIISADWKTISTSDSGPHWTNLRKGL  
QNVALSPHNLAQFQFQEKDMTKMIQTLLEEEARNNNGIVKPLDHMKKATLRLISRLVFGQDFNNDKYVDD  
MHLAIEELIRVSGYARLAEAFYYAKYLP SHKKAVREVEEAQRRVQNLVSPFLSLNPPTNTYLHFLRSQKY  
DDEVIIFAIFEAYLLGVDSTSLTTAWALAFILIREPNVQEKLYQELESFASKNDRKILKVEDINKLQYLQA  
VIKETMRMKPIAPLAIPHKACRDTSLMGKKIDKGTTRVMVNIIFALHNNKNVFNDFPKFMPERFMKVDSDA  
NGKAMEQSLLPFSAGMRICAGMELGKLQFSFALANLAYAFKWSCVADGVLDPMSDQLGFVLLMKTPLEAR  
INRRN

>ECACYP719-2

MEEIKILIMNNPWILTATATLLISMFLFFTRKSSKMVWPQGPKTLPPIIGNMHLLGGTALQVVLHNLAKV  
HGSVMTIWIWSWRPVIVVSDIERAWEVLVNKSSDYSARELPDIKIYNTADCRTIATCDSGPHWSNLRKGL  
QNVALSPNNLAAQFQFQEKDVIKIDILEQEAINKNGIVKPLDHLKATIRLISRLVFGQDFNDDKYVED  
LHQAIIEELIRMSGYARLAEAFYYAKYLP SHKKAIRHAELTKQIVTNLVRPFLSLNPPTNSYLHFLQSQKY  
DEEMVIFAI FETYL LGVDSTSTTAWALAYLVREPNVQDRLYNELN NYAKYNDRKILKVEDINKLQYLQA  
VTKETMRMKPIAPLAIPHKACRDTSLMGTKIDKGTVMVNLHALHNNENVFTDPFKFMPERFLKVNNEVDV  
NMKAMEQSLLPFSAGMRICAGMELGKLQFSFALANLIFAFKWSCVDDGVLDPMSDELGFVLLMKTPLKAR  
INPRN

>ECACYP719-3

MEESLWVVTATVVVVFAIAKLLKSSSISTMEWPKGPKKLPPIIGNLHQLGGEAFHVVLANLAKIHGTVMT  
IWVGAWRPMIVISDIDKAWEVLVNKSSDYAGRDFPEITKIISANWKNISCSDSGPFWQNLRKGLQGGALA  
PLNVISQYQLQERDMKNLITSMQEKASKNNGILKPLDYLKEETIRLLSRLIFGQSFNDENFVKGVHLALD  
DLVRISGYASLADAFKFCENLP SHKKSIREVHEVNERVVNLVKPYLVKNPPTNTYLYFLNSQKFSDEVII  
SAVLEVYDLGVDSTASTAVWALFVLVREPRVQEKLYKEIIDLTGGERSVKVEDVSKLPYLQAVMKETMRM  
KPIAPMAIPHKTSRDTSLMGKKVNGKTSIMVNLYAIHNNPKVFPPEYKFIPEFLQGGESKYGDIKEMEQ  
SLLPFSAGMRICAGMELGKLQYGFSLASLVEAFKWCAVDGKLPDLSDFHCFILLMKNPLEARITPRTQL

>ECACYP719-4

MEEMKFLIMNNPWVLFATSATLLISIFLFFRRKSPNMAWPEGPKTLPPIIGNMHLLGGTALQVVLNLAKEV  
HGRVMTIWIWSWRPVIVVSDIEQAWEVLVNKSSDYSARDMPDITKIIVTADWRTISTSDSGPHWSNLRKGL  
QNI AISPNLAAQFQFQEKDIKMIQILQEQEAKDNGIVKPLDHLKATIRLISRLVFGDFEEDKYVED  
MHHAIEELIRISGYARLAEAFYYAKYLP SHRKAVRYVEELKQIVKNLIRPFLSLNPPTNTYLHFLRSQNY  
DEEVVIFAI FETYL LGVDSTSTTAWSLAYLVREPNVQDRLHQELDHFQAKQNDRKILKVEDMNKLQYLQA  
VIKETMRMKPIAPLAIPHKACKDTSLMGKNINKGTTRVMVNLALHNNKNVFNDFPKFMPERFLKVDNQDA  
KKGAMEQSLLPFSAGMRICAGMELGKLQFSFALANLIFAFKWSCVDDGVLDPMSDELGFVLLMKTPLKAR  
INPRN

>GFLCYP719-1

MEMKSSVVSYPAMEELFKSNPWITGTTLAVLILMTTMRKKSLSMKWPKGPKTLPPIIGNMHLLGGTNL  
QVILHNMSKVYGNVMTIWIWSWRPVIVVSDIERAWEVLVNKSSDYSGRDMPEITKIISADWKTISTSDSG  
PHWTNLRKGLQNVALSPHNLAQFQFQERDICKLIETLKEEAKLNGIVKPLDHLKATIRLISRLVFGQ  
DFDNSKYVEDMHHAIEELIRVSGYARLADAFYYAKYLP SQKAVRDVEEAQRRVQRLVRPFLSLNPPTNC  
YLHFLRSQNYSDDEVIIFAIFEAYLLGVDSTSTTAWALAFVREPNVQEKLYQELKNFTAKNGREMLKVE  
DINKLPYLQAVIKETMRMKPIAPLAIPHKACRDTSLKGRKIDKGTQIMVNIYALHNNENVWKEPDKFMP  
RFLQTDQDVNGKAMDQSLLPFSAGMRICAGMELGKLQFSFLANLLNTFQWSCVADGVLDPMSDQLGFVL  
LMKTPEARITPRC

>GFLCYP719-2

MVEISVQWILTTSVVVLFVFAIASKMFANGRKSSMKWPEGPKTLPVIGNMHQLGGTALQVVLHKLADVYGS  
VMTIWIIGSWRPVIVVSDIDRAWEVLVNKSSDYSAREMPEITRINTANWRTISTSDSGPHWSNLRKGLQNV  
ALSPLNVAAQSQFQERDINQVIKDLQEEAALNNGIVKPLDHLKATVRLLSRFIYQNFHDDKYVESMHY  
EIEELIRISGYARLAEAFYYAKYLP SHKKLEKAVEEAHYRVKALISPLLTSDPPPNSYLHFLLSQNHPEE  
VIIFCIYEVYLLGVDSTSTTAWALAFVREPAVQEKLQELSNFVGDRQQMGC AVKVEDVNKLQYLQAV  
MKETMRMKPIAPLAIPHKACKDTS LGGNKVDKGTRVMVNLHALHHPKVWKEPNTFKPERFLELKD KEME  
QSFLPFSAGMRTCAGMELGKLQFGFALANLVNAFQWTCVADGKLPDMSDLLGFVLFMKTPEARIVPRVR  
>GFLCYP719-3

MGRFLAPDIEMEEFWLVTATVIVVFAVAKFFTRSSSISKMEWPAGPKKLP IIGNLHQLGGNVFHVVLAN  
LAKVHGSVMTIIVGSWRPMIVISDIEKAWEMLVTKSSDYSGRSFPEITKIISANWKNISCSDSGPFWTLN  
RKGLQGGALAPLNVISQYHLQEKDMENLVKSMRVEASKNNGNIKPLDHLKQETVRLLSRLIFGQDFHDEK  
LVVGMHHALDDLVRISGYASLADAFKIAENLPSHKKSIREVHEVNERVKLV RPHIVSNPPTNTYLYFLQ  
SQKFSEDVIIISAILEVYDLGVDSTASTTWWALTFLVREQEIQEKLYQEIKSVSGGRSTVKVEEVSKMPYL  
QAVMKESMRMKPIAPMAIPHKAQRETTLMGKKVDKDTVLMVNLYAIHHPNVFPEPFKMPERFLQGEDH  
HNGGNIKAMEQSLLPFSAGMRICAGMELGKLQLAYGLASLVNAFKWDCAVDGLKLPDMSDHC FILLMKNP  
LEARITPRTH

>HCACYP719-1

MAEIELGLWLGGA VVAIVLSTILFRSSSSSSSFSSQTKWPAGPKKLP IIGNMHQLGGDVLHVALDKLSKI  
HGGVFTFWIGSWRPVIVISDIDKAWEVLVNKSSDYSARDMPEITKIGSASWHTISTSDPGPFQNV RKGL  
QGGAMGPLNMSAQT PFQEKDMKNLIETMKIEAENNGI IKPLDHIKKNTRVRLLSRLIFGQMFEDDKFIES  
MHYEIEDIIRISGYARLAEAFYYAKYLP SHKRAEKEAFLVKCRVEDLVRPLLKSNPPS NSYLYFLLSQNY  
PEEVIIIFCIFYLYLLGVDSTSTTTWALAYLIREQAVQEKLQDIKVTIGNANLVKVEDVNKLKYLQGVV  
KETMRMKPIAPLAIPHKSSKDTTLMGTVAKGTRLMVNLYALHHPNINWSEPFKMPERFLEDGNNNKAM  
EQSFLPFSAGMRICAGMDL GKLQFAFALANLVNAFKWSCVEEGKFPDMSEEF SVLLMKNPLEARITPRK  
AH

>JDICYP719-1

MTKSSSSWSTMKWPAGPKTLP IIGNLHQLQGDIFHKALAKLAGVHGGVMTIWLGSWSPVIVVSDIDHVWE  
VLVSKSFDYSARPKPDLIKIVAGDDINISDSGTFWYNLRKGLQNVPLGPVNICAQTN YQEGDIEQMIGDM  
QEEASSNGGIVKPLYHLKRASTRLLCRLIFGHTFHDDSFVESINNAVEKMIRLGENVHLAEAFSYTKYLP  
SHKRAVRRSYELKLAIQELVRPFLVSTPPPNTYLYFLLSQHHPEEVIISCFELFVLGVDSTSTTTWAL  
AFLIHDQVVQEKLQEI IQVSNGDCLLRSKDLSKMQYLQAVMKETMRMKPIAPLAIPHITSKHTTLMGTK  
VAKGTSVIVNLYALHHPNINWDPYKFMHRFLQGDVVNVKAMEQSFLPFSGGMRICAGMELAKLQFSL  
ALANLVRTFKWTTVLDGNLPDMSEELSFITLMKTPEARIIICRHH

>MAQCYP719-1

MEFTVWVVSFNVLVVVAMSMFLLR TKSSSSTTKWPIGPKKLP IIGNLHLLGGDVLHVALAKLAKVHGGIM  
TIWIGSWRPVIVVSDIDKAWEVLVNKSSDYSARDMPEITKIASASWHTISSSDSGPFQNL RKGLQNGAL  
GPANISAQSQLQERDIKRMIGDLQKEAKINGGIVKPLDHIKKA AVRLLSRLIFGHTFDDDSFIESMHHEI  
EDLIRISGYARLAEAFSYAKYLP SHKLAVKEAYEVKHRVEQLVRPLL TSSPPANSYLNFLLSQDYSEEVI  
TFCIFEIYLLGVDSTSTTTWALS YLIHEQQVQEKLQSIKGVTSDDDGLVKAEDLSKLQYLQAVMKETM  
RIKPIAPLAIPHKASKDTKLMGTVAKGTRVMVNLYALHTKENIWS DPEKFKPERFLHGDEGVNVKAMEQ  
CFLPFSAGMRICAGMELGKLQFSIALANLVKAFK WTSVVDGELPDMSEELSFVLLMKTPEARIIIPDL

>MCACYP719-1

MGEGLWIVATTLVMGVLI FMMEQSLLWRRRSTQKWPPGPTKFPFIGNLYQLNKG GELVHVTLTKMAQQ  
YGRIMTIWFGSQEPTIVVSDHELAWEVLVTKSSDYSSRTL PYLSRVTSADFHTLATCDLGPYQTLRKGL  
QAFTINPHNISSQIHLQEKDIADLVLSLEEEASLNNGVVDPLPKLRLLILLIRRFCFGPDREFNDDL FV  
ERMDCALEDVIRLFGHARLIDVFEFARYIPGIGLGPFEVKRLKQRIKELIRPYILAHKSSNSACQ NCHL  
NFLLSQGFTEDVVILNLFELFMLGVDSTSA AIAWALAFVIHEEETQQKL VDEVINKLGRGRMVGVVEVS  
ELEYVQAVVKETMRMKPIAPLPVPHRAVRDSELGTVKREGTQVLVNLYAVLTDGRVWKEPNRFMPKRFL  
QSQRGEDMRAMIMGERSFIPFGAGRRICAGMELAKPQVALTLANLVYKFQWCSEVEGQLPDLSEDLTFV  
LRMKTPLVA

>NDOCYP719-1

MDPMSLWAAIAIVLVM TLLVLLQTRTKSLPSSSTQWPTGPKTLP IIGNLHQL EGDVFHVALAKLAKMHGD  
IMTIWIGSWRPVIVISDYDKAWEVLVNKSSDYSARDMPEITKIASAGWRTISLSSSGPFWHTLRKGLQNG  
PFGPLNVSAQILSQERDMRRMIRDMQEEADINGGIVKPLGHLK KATVGLLTRLIFGQNFDDDSFIESIHH  
ETEELIRISGYARLAEAFSYAKYLP SHRRAVKESYECKHRVEELVKPLLSSNPPKNSYLNFLQSQDYPEE  
VIIFCIFEIYLLGVDSTSTTTWALAF LIHEPAVQEKL YQEVK CITNGDGGLVKAGDLSKFQYLQAVMKE  
TMRMKPIAPLAIPH TTSKDTTLMGTKVAKGTRIMVNLYALHHPNIWSEPFKFM PERFLQE QFNQVGGDA  
NVKAIEQSFLPFSAGM RICAGMDLGLQFSFALANLVNAFKWTTVADGKFPDMNEELSFVLLMKT PLEAR  
IVPRKP

>NDOCYP719-2

MEAISLWTVSASF LTLALAIILPRTRNSSSIINWPPGPKTLP IIGNLHQLGGQLLHVALTNLAKVHGGV  
MTIWIIGSWRP IIVISSPEEVWEVLVKKSPDYAARDMPEITKLITGYWHTISSSHSGQFWSNLRKGLQNGP  
LGPLNITTQMSFQERNIKRMISDIQEEATFNGGIVKPLEHLK KATLRLLSHIIFGQSFDDDDQFIDSMHHQ  
IEELIRINGFAPLVDAFSYAKYLP SHKRAIKETYRVKNQIEQLVRPVIASSPPANCYLHFLLSQGYSEEV  
VIYSIVELYSLGVDSTASTTTWALAF LIHDQTVQDKLYQDIKHIAATDALVKIEDLSALHYLEAVMKETM  
RMKPIAPLAIPH KTSKDTTVRGTKVAAGTCVLVNLYALHHDHKI WAKPHKFM PERFL EGNVNGGSSGAN  
VKVIEQSFLPFGAGM RICAGMELGKLQFSFALANLVNAFKWTSVVDGKLPDMSEELKFIMLMKT PLEAR  
IPRNSLN

>PBCYCP719-1

MIMNSWILT LISTILSVVFAAVLIIFRRRISASTTEWPVGP KTLPIIGNLHILGGTALHVVLHKLAEVY  
GSMVTIWIIGSWKPV IIVSDFDRAWWEVLVNKSSDYSAREMPEITKIGTANWRTISSSDSGPFWATLRKGLQ  
SVALSPQHLASQTAHQERDI IKLKLNKDEAALNSGTVKPLDHLK KATVRLISRLIFGQDFDDDKYVEDM  
HDVIEFLIRISGYAQLAEVFY YAKYLP SHKRAVTGAEAKRRVIALVRPFLQSNPATNTYLHFLKSQHYP  
EEV IIFAI FEAYLLGVDSTSTTAWALAF LIREPSVQEKL YQELKNFTANNR TMLKVEDVNKL PYLQAV  
VKETMRMKPIAPLAIPH KACKDTSLMGKKVDKGT KVMVNIHALH HTEK VWKEPYKFM PERFLQKQDKAME  
QSLLPFSAGM RICAGMELGKLQFSFALANLVYAFKWSCVSDGVL PDMSDLLGFVLFMKT PLEARVVPRL

>PBCYCP719-2

MEENSWFITATITVIVVFLAKFLASKIFSP TTEWPAGPKTLP IIGNLHQLKGDLFHVVLQNLAKVHGG  
VFTIWIIGSWNPV IIVSDFNIAREVLVSKSLDFSARSVPDYVKIVSAGGKTISESDCGPFWHGLRKGLQGV  
ALNPLHLMSQSHLQERDMQNLIKSMQESASQEDGVIQPLDYIRKATIRLLSRILIGQDFSNEDFVDSMNH  
TLHKLVSIGGFASLADAFKIGEYLP THKKFIRELKD VSEEAANLILPYIVSKPSKNTYLHFLVSQEYSED  
VIVSAVLEIFGMSSDSTAAATVWALAF LVRHPDIQEKL YQEIKNVTGGNRPVQIVDVKKMPYLQAVV KET  
LRMKAVGPMGISHKASKNTSLMGKKIDKGTQVMVNHYA IHHNSDIFPEPYNFKPERFFKDVNSDASL GDR  
EKMESSLLPFGAGM RVCAGTDIAKLIISFGIASLVNEFKWSCVSDGKLPDLS EDSLFI LLMKNPLEARIA  
PRVD

>PBCYCP719-3

MAPINIEENDFWMIACTV IIVFALVKFMFSFYQSANTTEWPEGP KTLPIIGNLHQLGGGVPLQVALANLS  
KVYGGAF TIWIIGSWVPMIVISDIDNAREVLVNKSADYSARDVPDILKIITANGKNIADCDSGPFWHHLK K  
GLQSCINPSNVMSLSRLQE KDMQNLIKSMQERASQQNGILKPLDHAK EASIRLLSRVIFGQDFSNEDLVI  
GVKDALDEMVRISGLASLADAFKIAKYLP SQRKNIRDMYATRDRVYNLIQPHIVSNLPANSFLHFLTSQD  
YSDEI IYSMVLEIFGLGVDSTAATAVWALSFLVGKQEIQEKL YREINNLTGGQRPVKVADL KELPYLQAV  
MKETLRMKPIAPLAVPHVAVKDTTFKGR RIVKGT KVMVNLYA IHHDPNVFPAPYKFI PERFLKDVNSDGR  
FGDINTMESSLIPFGAGM RICGGVELAKQMVGFALASMVNEFKWDCVSEGLPDLREAVSFI LYMKNPLE  
AKITPRDARSYKTFGQ

>SCACYCP719-1

MEFEKIMMSNPWILAATTAVVFISITAIFFRRKSSSMEWPTGPKTLP IIGNMHLLGGTALHVVLHNF AKI  
YGNVMTIWIIGSWRPV IIVSDIDRAWWEVLVNKSSDYSARDMPEITKIISADWKTISTSDSGPFWHTLRKGL  
QNVALSPHNLA AQARFQERDISKMIETLKEEAALNNGIVKPLDHLK KATVRLISRLIYGQEFDN NKYVED  
MHHAIEELIRVSGYARLAEAFY YAKYLP SHKKA VRDVEE ANRRVKNLVRPFLSSNPP TNCYLHFLRTQNY  
PEEV IIFAI FEAYLLGVDSTSTTAWALAF LVREP NVQEKL YQELKNFTTNNDRKMLKVEDINKLQYLQA

VIKETMRMKPIAPLAIPHKACKETSMLGSKVDKGTRVMVNIYALHHNQKVWKEPYKFMPPERFLETDNQDG  
NVGKAMEQSLLPFSAGMERICAGMELGKLQFTFSLANLVNAFKWSCVSDGVLPMDSQLGFVLLMKNPLEA  
RIVPRS

>SCACYP719-2

MEEMISLQWILTAVIVVVVVAMASKIFSNRRKSSMKWPDGPKTLPPIIGNMHQLGGTAGLQVVLHKLADVY  
GSIMTIWIGSWRPVIVVSDIDKAWEVLVNKSSDYSARDMPEITRINTANWRTISTSDSGPFWSNLRKGLQ  
NVALSPHNLAASQFQERDINRLIKNLKEEAALNDGIVKPLDHLKATVRLLSRLIYGQNFDDKYVETM  
HNEIEELIRISGYARLAEAFYYAKYLP SHKRVEKAVEEAHYRIKALISPLL SWNPPLNSYLHFLRSQNY  
EEVIFCIYEVYLLGVDSTSTTAWALAFVREP AVQEKL YQELNFTHDRQMSAVKVEDVNKLPYLQAV  
MKETMRMKPIAPLAIPHKACKETS LGGNKVDKGTRVMVNLHAIHHPKVWHEPYRFLPERFLQVNKETIN  
NGGGGGGTAKEMEQSFLPFSAGMERICAGMELGKLQFGLALANLVNAFQWSCVADGKLPDMSDLLGFVLFM  
KNPLEARIVPRIR

>SCACYP719-3

MEESFWLVTVSVIVLFAVAKFFRKSSSIPKMEWPAGPKTLPPIIGNLHQLGGDV FHVVLANLAKVYGSVMT  
IWVGSWRPMIIVSDIDKAWEVLVSKSSDYSARDMPDITKII SANWKNISCSDSGPFWHNLRKGLQGGALA  
PLNVISQYHLQERDMQNLINSMQEQEASKNNGILKPLDHLKQETVRLLSRLIFGQDFHDEKLVVGMHHALD  
DLVRISGYASLADAFKFAENLP SHKKSIREVHEVKERVENLVRPHIIPNPPTNTYLHFLQSQGFSEDI  
SGILEVYDLGVDSTASTTVALTFLVREQIQEKL FEEIKKVTGGRSSVRVEEVSKMAYLQAVMKETMRM  
KPIAPMAIPHKTSKETS LMGKVDKGSVIMVNL YAIHHPNPEVPEPYKFKPERFLQGSNIKAMEQSLLP  
FSAGMERICAGMELGKLQAFGLASLVNAFKWDCAVDGELPDMSEDHCFILLMKNPLQARITPRTH

>SDICYP719-1

MESLIDFSNPAKMEELMSNPWIITAITLAVVIIMMTIFRRKSSSMKWPKGPKTLPPIIGNMHLFGGTDLHV  
VLYNIAKVYGNVMTIWIIGSWRPVIVISDIERAWEVLV NKSSDYSARDMPEITKLISDWTISTSDAGAF  
WTNLRKGLQONVALSPHNLAASQFQEQESDIKLIETIKEEGAVNNGIVKPLDHLKAMVRLISRLIFGQDF  
DNDKYVEGMHHAIEELIRVSGYARLAEAFYYAKYLP SHKKAVRDVEEANRRVQKLV RPFLSLNPPTNTYL  
HFLRSQNYSEEVIFAI FEAYLLGVDSTSTTAWALAFI REPVQEKLYQELKNFTVKNGRDMLKVEDI  
NKLPYLQATIKETMRMKPIAPLAIPHKACRDTSLMGSKIDKGTRVMVNIYALHHNEKIWKPFKFMPPERF  
LQTEGEVNGKAMEQSFLPFSAGMERICAGMELGKLQFNFALANLVNAFKWSCVADGVLPMDSQLGFVLM  
KTPLEARITPRC

>SDICYP719-2

MEESFWLV TATVVVVV FVIAKLQFRKSSSISTMEWPAGPKTLPPIIGNLHQLGGAALHVVLANLAKAYGSVM  
TIWVGSWRPMIIVISDFDKAWEVLVNKSSDYSARSLPEITRIISANWKNIMTSDSGPFWQNLKGLQSGAL  
SPHNVM SQYQLQERDMQNLIKTMRVEAFKNNGRIKPLDHLKQETVRLLSRLIFGQDFNDEKLVVGMHHAL  
DDLVRISGYASLADAFKFAENLP SHKKSIREVHELKKRVENLVRPHIVSNPPTNTYLNFLQSQNFSEDLI  
ISAILEVYDLGVDSTASTTVALTFLVRELKVQEKL YQEIKNLTGGRSTVKVEEVSKMPYLQAVMKETMR  
MKPIAPMAIPHTAARETSLMGKKIDKGTVMVNL YAIHHPNPIFPEPYKFMPPERFLHGEEQNGGNIKEME  
QSLLPFSAGMERICAGMELGKLQGFALASLVNAFKWECVADGKLPDMSDHC FILLMKNPLEAKITPRTH

>TFLCYP719-1

MEVNLWLV SATFATLLAITTLIRMFKSSSQMKWPSGPKTLPPIIGNMHQLGGDLLHVVLAKLAKVHGGVMT  
IWIIGSWRP IIVVTDIDKVWEVLVSKSADYAARDFPEFTNFVTASRHTISSSDLGAFWQTLRKLQNGALG  
PINIAAQSQFQERDMQMTQAMVDEAGRNNNIVKPMEHKKNVRLLTRLI FGETFDDDEFVDSMLYDVD  
DVIRIGGFARLAEAFYYAKYLP GHRKAVREANLLKLRVEKLI RPFSSNPPKNSYLYFLLSQNIPEEVII  
FCIFELYCLGVDSTSTTTWALAYLVHEQAVQEKL YQEIRMTLGDVDQVRIEDVSKMKYLQAVVKETMRM  
KPIAPFAIPHTAKDTTLMGTQVAKGTSIMVNL YALHHPNDIWTPEPYKFI PERFMQGEDGSATNKAMERS  
FLPFGAGMRTCAGMDL GKLQFAFVLANLVNAFKWSCVEEGKLPDLSDELAFVLLMKTPLEAKITPRKS

>XSICYP719-1

MEMSPTLLVCATVAIVFTITTTIIRNLFSSSSFSQMKWPTGPKTLPVIGNLHQLGDDVLHVALAKLAKVHG  
SVMTIWIIGSWRPVIVISDIDKAWEVLVNK SADYGARDMPEITKIASASWHTISTSDAGPFWQNVKGLQS  
GAMGPLNVAAQNQFQERDMKRLVNAMSDEALNSKGIVKPLDHKKNVRLLTRLI FQTFDDDKFIESMH  
YEIEDIIRISGYARLAEAFYYAKYLP SHKKAEREAFLVKCRVEKLV RPLSSNPPSNSYLYFLLSQNFEE



EVIIFCIFEYLLGVDSTSSSTTTWALAYLIREQGAQEKLYQDIRMTLGDVDLVKIEDVSKLKYLQGVKE  
TMRMKPIAPLAIPHKTAKETTLLVGTAKVAGTRIMVNLYALHNNENIWPEPYKFMPEFLGEAKTAYNKA  
MEQSFLPFSAGMRICAGMDLGKLGQFALANLVNAFKWSCVEEGKFPDMGEELSFVLLMKTPLEARIAPR  
NV

>AMECYP719A13

MEEKIMTNNSPWILTSSTTTTTILLSLFTIFIIILRRNKSSSSKMWPTGPKTLPIIGNMNILGGTALH  
VVLHNLAKTYGNVMTIWIIGSWRPVIVVSDIDRAWEVLVNKSSDYSARDMPEITKLATADWKTISSSDSGP  
FWTNLRKGLQNVALSPQNLSSQSKFQERDIIKTIQNLKEEAKMNNGIVKPLDHLKAMVRLISRLIYGQD  
FDNDEYVEEMHHTIEELIRVSGYARLAEAFYYAKYLP SHKKAVREVLQANQRVQNLVRPLLSLNSPTNTY  
LHFLRSQNYEDEVIIFAIFEAYLLGVDSTSSTTAWALAYLIREPNVQEKLYEELKNFTNDNDRKMVKFED  
LNKLQYLQAVVKTMRMKPIAPLAIPHKACRETSLMGRKVNQGTRVMVNIYALHNNQNVWKEPYKFNER  
FLQKNQDGDGKAMEQSLLPFSAGMRICAGMELGKLGQFALANLVNAFKWSCVSDGVFPDMSDQLGFVL  
LMKTPLEAGIVPRM

>AMECYP719A14

MDETIWLIISTVIVLGIKFLGKSSSSSLSTMEWPVGPCKLPIIGNLHQLGGDVFHVLANLAKVYGS  
VFTIIVGWSRPMIIVSDIDKAWEVLVNKSADYSARDMPDITKIISANWKNISCSDSGPFWHNLKGLQGV  
ALTPLNVASQYHLQERDMKNLINSYKDA SRKNGILKPLDYLKEETVRLLSRLIFGQDFQDEKLVVGMHH  
ALDDLVRISGYASLADAFKFCENLPSHKKSIREVHEVKKRVENLIRPHIVSNPPTNTYLYFLKTQDFNED  
IIISAILEVYDLGVDSTASTTVALTFLVREQEIQEKLYREIVNVTGGKRSVKVEDVNKMPYLQAVMKET  
MRMKPIAPMAIPHKT SKDTSLMGKKINKGSVIMVNLYAIIHNPVKVFPEPYKFMPEFLKDVNSDESLGNI  
KTMESSLLAFSAGMRICAGMELGKLGQFALANLVNAFKWSCVSDGKLPDLSDFHCFILLMKNPLEAKIT  
CRIH

>CJACYP719A1

MEMNPLLVCATVAIVFATTTIIRILFSSSSLPQMKWPSGPRKLPPIIGNLHQLGDDVLHVALAKLAKVHGS  
VMTIWIIGSWRPVIVISDIEKAWEVLVNKSADYGARDMPEITKIASASWHTISTSDAGSFQNVKGLQSG  
AMGPLNVAAQNYQERDMKRLIKAMSDEAANNNGIVKPLDHIKKNTRVLLTRLIFGQAFDDNKFIESMHY  
EIEDIIRISGYARLAEAFYYAKYLP SHKKAEREAFVVKRVEELVRPLLSKPTNSYLYFLLSQNFEE  
VIIIFCIFEYLLGVDSTSSSTTTWALAYLIREQGAQEKLYQDIRMTLGDVDLVKIEDVNKLYLQGVVKT  
MRMKPIAPLAIPHKTAKETTLMGTAKVAGTRIMVNLYALHNNQNIWPDYKFMPEFLGEGETAYNKAM  
EQSFLPFSAGMRICAGMDLGKLGQFALANLVNAFKWSCVEEGKLPDMGEELSFVLLMKTPLEARIAGR  
V

>ECACYP719A2

MEEMKILMNNPWILTATATLLISIFLFFTRKSSKMWVWVAGPKTLPIIGNMHLLGGTALQVVLHNLAKV  
HGSVMTIWIIGSWRPVIVVSDIERAWEVLVNKSADYSARDMPDITKIISADWKTISTSDSGPHWTLNRKGL  
QNVALSPHNLAAQFQFQEKDMTKMIQTLEEEARNNGIVKPLDHMKKATLRLISRLVFGQDFNNDKYVDD  
MHLAIEELIRVSGYARLAEAFYYAKYLP SHKKAVREVEEAQRRVQNLVSPFLSLNPPTNTYLYHFLRSQY  
DDEVIIFAIFEAYLLGVDSTSLTTAWALAFIREPNVQEKLYQELESFASKNDRRILKVEDINKLQYLQA  
VIKETMRMKPIAPLAIPHKACRDTSLMGKKIDGTRVMVNIIFALHNNKNVFNDFPKFMPEFLKVDNQDA  
NGKAMEQSLLPFSAGMRICAGMELGKLGQFALANLAYAFKWSCVADGVLPDMSDQLGFVLLMKTPLEAR  
INRRN

>ECACYP719A3

MEEMKFLIMNNPWVLFATSATLLISIFLFFRRKSPNMAWPEGPKTLPIIGNMHLLGGTALQVVLNLAKV  
HGRVMTIWIIGSWRPVIVVSDIEQAWEVLVNKSADYSARDMPDITKIIVTADWRTISTSDSGPHWSNLKGL  
QNI AISPNNLAAQFQFQEKDIKMIQILEQEAKDNNGIVKPLDHLKATIRLISRLVFGDFEEDKYVED  
MHHAIEELIRISGYARLAEAFYYAKYLP SHRKAVRYVEELKQIVKNLIRPFLSVNPPTNTYLYHFLRSQY  
DEEVVIFAFETYLLGVDSTSSTTAWALAYLVREPSVQDRHQELDHFAKQNRKILKVEDMNKLQYLQA  
VIKETMRMKPIAPLAIPHKACKDTSLMGNKINKGTRVMVNLYALHNNKNVFNDFPKFMPEFLKVDNQDA  
K GKAMEQSLLPFSAGMRICAGMELGKLGQFALANLIFAFKWSCVDDGVLPDMSDELGFVLLMKTPLKAR  
INPRN

>ECACYP719A5

MEESLWVVTATVVVVFVFAIAKLLKSSSISTMEWPKGPKKLPPIIGNLHQLGGAEFHVVLANLAKIHGTVM  
IWVGAWRPMIVISDIDKAWEVLVNKSSDYAGRDFPEITKIISANWKNISCSDSGPFWQNLRKGLQGGALA  
PLNVISQYQLQERDMKNLITSMQEKASKNNGILKPLDYLKEETIRLLSRLIFGQSFNDENFVKGVHLALD  
DLVRISGYASLADAFKFCENLPSHKKSIREVHEVNERVVNLVKPYLVKNPPTNTYLYFLNSQKFSDEVII  
SAVLEVYDLGVDSTASTAVWALTFLVREPRVQEKLYKEIIDLTGGERSVKVEDVSKLPYLQAVMKETMRM  
KPIAPMAIPHKTSRDTSLMGKKVNGKTSIMVNLIAIHHNPKVFPPEYKFIPEFLQGESKYGDIKEMEQ  
SLLPFSAGMERICAGMELGKLQYGFSLASLVEAFKWCAVDGKLPDLSEDHCFILLMKNPLEARITPRTQL  
>PSOCYP719A19

MIMSNLWILTLISTILAVFAAVLIIFRRRISASTTEWPVGPCTLPIIGNLHILGGTALHVVHLKLAEVY  
SVMTIWIIGSWKPVIIIVSDFDRAWEVLVNKSSDYSAREMPEITKIGTANWRTISSSDSGPFWATLRKGLQS  
VALSPQHLSQTAHQERDIIKLIKNLKDEAALNSGMVKPLDHLKATVRLISRLIYGQDFDDDKYVEDMH  
DVIEFLIRISGYAQLAEVFFYAKYLPCHKRAVTGAEAKRRVIALVRPFLQSNPATNTYLHFLKSQLYPE  
EVIIIFAIFFEAYLLGVDSTSTTAWALAFILIREPSVQEKLYQELKNFTANNRNTMLKVEDVNLKPYLQAVV  
KETMRMKPIAPLAIPHKACKDTSLMGKKVDKGTVMVNIHALHHTKVVKEPYKFMPEFLQKHKAMEQ  
SLLPFSAGMERICAGMELGKLQFSFLANLVNAFKWSCVSDGVLPMSDLGFLVFMKTPLEARIVPRL  
>PSOCYP719A25

MEVTFWLITCGVVVAFALAKLLFGKKSSMSTMEWPSGPKTLPIIGNLHQLGGAEFHVCLANLAKVYGGVF  
TIWVGSWRPFIVISDVKAWEVLVNKSSDYSARDMPDITKIISANWKNISHGDSGPFWHNLRKGLQGV  
TPFNVASQYHLQERDMQNLIKSMKKKASQKNGILKPLDYVKEETVRLLSRLIFGQDFVDEDFVGMH  
DELVSISGYASLADAFKFCENLPSHKKTAVRAVHAIKIRFDNLIRPHIVSNPPTNTYLHFLSDFSEDVI  
ISAILEVYDLGVDSTASTTAVWALTFLVREQKIQEKLYREINNVTTGGKPKVKVEDLNKLPYLQAVMKETMR  
MKPIAPMAIPHKASKDTSLMGKKINKGAVVMVNLIAIHHNPAVFPPEYKFMPEFLKDANS DGSGLDIKK  
MESSLLAFSAGMERICAGMELGKLQAFGLASLVNEFKWDCFAEGKLPDLSEEHCFILLMKNPLEAKITPR  
IH

>PSOCYP719B1

MAPINIEGNDFWMIACTVIIIVFALVKFMFSKISFYQSANTTEWPAGPKTLPIIGNLHQLGGVPLQVALA  
NLAKVYGGAFITWIGSWVPMIVISDIDNAREVLVNKSADYSARDVPDILKIITANGKNIADCDSGPFWHN  
LKKGLQSCINPSNVMSLSRLQEKDMQNLIKSMQERASQHNIGIIPLDHAKESMRLLSRVIFGHDFSNED  
LVIGVKDALDEMVRISGLASLADAFKIAKYLPSQRKNIRDMYATRDRVYVNIQPHIVPNLPANSFLYFLT  
SQDYSDEIYISMVLEIFGLGVDSTAATAVWALSFLVGEQEIQEKLYREINNVTTGGQRPVKVVDLKEPYL  
QAVMKETLRMKPIAPLAVPHVAAKDTTTFKGRRIIVKGTVMVNLIAIHHDPNVFPAPYKFMPEFLKDVNS  
DGRFGDINTMESSLIPFGAGMERICGGVELAKQMVAFALASVNEFKWDCVSEGKLPDLSEAISFILYMKN  
PLEAKITPRTKPFQRQ

>PSOCYP719A20

MEKTIFSNPWILTTSTLVVITITMLMVFKRKSSTMVWPTGPKTLPIIGNMHVLGGTALQVVLHNLAKI  
HGNVMTIWIIGSWRPFIVVSDIDRAWEVLVNKSSDYSARDMPEITKIISADWKTISTSDSGPGWSNLRKGL  
QNVALSPHNLAASQSFQEKDITKMIQSLKKEAASNNGIVKPIDHLKATLRLISRLIFGQDFDDDKYVDD  
MHHAIEELIRVSGYAQLAEAFYAKYLPCHKKAVRDVEEANQRVKKLVRPFLSLNPPTNTYLHFLNSQKY  
DEEVIIIFAIFFEAYLLGVDSTSLTTAWALAFILIREPVVQDKLYQELKNLTAKNDCEIVKVEDLNKLYLQA  
VLKETMRMKPIAPLAIPHKACRDTSLKGNKIDQGTQVMVNIYALHHNEKVVKEPFKFMPEFLQTQDVVN  
GKGMEQSLPFSAGMERICAGMELGKLQFSFLANLVNAFEWSCVSDGVLPMSDQLGFLVLLMKTPLQARI  
VPRV

>TFLCYP719A1

MELVSLWLVSATLALVVAITILIPMVTSSSSFSQMKWPTGPNKLPPIIGNLHQLGGDVLHVALAKLAQVHG  
SVMTVWIGNWRPIIVISDIDKAWEVLVNKSSDYGARDMPEITKIASASWHTISTSDAGAFWQTVRKGLQS  
GAMGPLNIAAQSQFQERDMKRLIQLRDEAAQNNNIVKPLDHKKNTVRLTRLIFGQTFDDDKFVESH  
FEIDDIIRISGYARLAEAFYAKYLPCHKKAEREAYLVKCRVEDLVSPLLSNPPTNSYLYFLLSQRFSE  
EVIIIFCIFEYLLGVDSTSTTTWALAYLIREQAIQEKLYQDTRMTLGDVDLVKIEDVSKLKYLQAVVKE  
TMRMKPIAPLAIPHKATAKDTTLMGSKVAKGTRIMVNLIALHHNQNIWNTNPYKFMPEFLQGEDGSASNKA  
MEQSFLPFSAGMERICAGMDLGLQFAFALANLVNAFKWSCVEEGKFPDMSEELSFVLLMKTPLEAKITAR

KF

DIOX

>ATHDIOX

MVAVERVESLAKSGIISIPKEYIRPKEELESINDVFLEEKEDGPQVPTIDLKNIESDDEKIRENCIEEL  
KKASLDWGMHLINHGIPADLMERVKKAGEEFFSLSVEEKEKYANDQATGKIQGYGSKLANNASGQLEWE  
DYFFHLAYPEEKRDLSIWPKTPSDYIEATSEYAKCLRLLATKVKALSVGLGLEPDRLEKEVGGLEELL  
QMKINYYPKCPQPELALGVEAHTDVSALTFILHNMVPGQLFYEGKWVTAKCVPDSIVMHIGDTLEILSN  
GKYKSILHRGLVNKEKVRISWAVFCEPPKDKIVLKPLPEMVSVESPAKFPPTFAQHIEHKLFGKEQEEL  
VSEKND

>BTHDIOX1

METGLVAPIPLSVQNVQDLSTKNLDVIPSRYIRPELANDIISIDEGSKIPIIDLSKLTDEQFCQDELERF  
HLACKDWGFFQLINHGVDQDALENVKREVTEFFKQPFVKKQFSQQPGEVEGYQAYVFSDEQKLDWDM  
LYLITQPDVARNMKLVPTSPPTFRETIVKYSEELQKVKMCMASMAKNLEIEPEKFTNMFEGKIQSMRFN  
YPPCVEDDKVLGISPHSDATGITFLIQVNHVHGLQLRHKGNWVPVLTDDAILVNIQDVLEILSNGKYK  
SIEHRVVINKTKERLSVAAFHEVNDNMIGPLPELIKQGEDKYYKSLSFVDYTKLLNSEKLDGKTLIEQM  
KLKN

>BTHDIOX2

MEVDEIRSYGASLPVENVQALAAKDLKEIPERYIRPELEFDVVSISIENSIGEIPVIDLSRLLDEHFAHDEL  
AKLHSACEEWGFFQLINHGASEEVIEKMKTDTOEFFRLPLEEKAYTQVSNIEGYGQAFVFSQKLDW  
GDMLFLFALPINQRNFKFWPTNPTSFRETTEKYSLEVHKAICLLGLIAKNLIEPEKFTKVFEDGMQHF  
RLNYYAPCPHAHKVLGLSPHSDGSALTLLTQVNDVDGLQIKKNGNMPVKPISGAFIVNIGDVIEITSN  
GKYKSIEHRAIIDPKKERLSIAAFHNQNFRTTIGPFPELVKGNSTEKYKTVSYQDYLRNITSTGLDGKNR  
LEFMKL

>CCHDIOX1

MEEVKEELSPKALVNSGSSLLVPSVKELAKEQLTEIPSRYIRFDQESPVTTFQPTCLPSVPVIDIHSLLF  
QESEAATASELNRLHSACKNWGFFQIINHGVSSSLIEKIKLEIKAFFELPMEEKQKLWQQPCDQEGFGQL  
FVVSEEQKLDWCDMFFIRTLPTTIRKPHLFEKLPVPLRETLNYSLEMKKLAKTVLEQMAKALMDAEEEM  
RLLFDDGFQEMRLNYYPLCSQPEKTIGFTPHSDASALTILLQLNETEGLQIRNEGKWVPVKPLPNAFVFN  
IGDVMEIVSNGIYHSIEHRAVNSTMERLSIATFYRTNLEAEIGPARSLIGPHKPAVFKRVMTEKYYKDF  
FAREIKGKSYLDSMRINGTGEEKSS

>CCHDIOX2

MAPAPISSINVGHIDDVQELRKIQPTKIPERYVRDIAERPTKTHARSPMQIPVIDLSKLMRNDKEMAQNE  
LSKLAYSCEWGFQVINHGIDTELIECIEEVAKKFFMLPLEEKQKFPMPAGTLQGYGHAFVFSQKLD  
WCNMLALGVEPFFIRNPKLWPTNPAEFSETLDLYSANIRKLCCKILLTFIAMSLGLNDDMFNDMFGTAVQA  
VRMNYPPCSRDLVLGLSPHSDGSALTVLQQAAGSSVGLQIRKDDKWVPVKPVPNALVINIGDTIEVLT  
NGKYKSVEHRAVTNKEKDRLTIVTFYAPSYDIELGPLPECIDENRPCMYKKYNHGEYSKHYITSKLEGKK  
TLDFXXXXXXXXXXXXTKI

>CCHDIOX3

MEEIHLVSTVADHISSIVNQRVQDFAINVKEPPSRYIRKAINDDIDFGLNQTTTTVDXXKDDSLSSSSVP  
IIDLQRLSSSSIEEKAEMEKLRSALASWGLFQAVGHGIPNTLLDEVNISKQFFELPSEEKQKYSKLG  
VDTFDDLEGYGNDPVTSGDQVLNWNDRYLLVKPEEQKLNFWPEHPNHFRDTLHEYSVKSSIAAEFILK  
TMSSELLGLKEKYLNLQGEQAPVYVRFNYPPCPRDLVYGMTPHSDVGGITIIILQDEVEGLQVLKDEKW  
INVPTIPHALLVNMADLMEMMSNGQFKSPVHRVITNAEKERISLAMFFSPELDKEIQPAAELIDDDKPR  
FKKVIVKEYFKYFFPRYLEGKRAIDWAKV

>CCHDIOX4

MEVKTAEASRLPHVPPQYIQPVENRPAIDSCREKSSDFGIPVIDLNFDPQCSSGACQELGRACRDWGA  
FIINHGVPKRLLEDMMTAGLSFFNECSSAEKRYSCDPNSAASEGYGSRMLVKEDTVLDWRDYFDHHTLP  
LSRRPNRWPQSPSSYRGVVVEYSDHIKSLAVKLSMISESLGLPGSCIEDIVGEIYQNTISYITISYY

PPCPQPELTLGLQAHSDIGAITLLIQDDVGGLEVLKGEWVTVQPLSGAIVVILADQTEIITNGKYRSSV  
HRAVTNSHRARLSVGTFFHDPKSRKICPATGLISKDSPAKYREVYGDYISAWYSKGPEGKRNI DALLIH  
E

>CCHDIOX5

MKNEMIIIEKGLGGSLPVESVQALASKDLKDIPARYIRPELESDVVNTDGSLEIPVIDLSRLLDQQFMYEE  
LKKFHSACEDWGGFFQLINHGVPPEEVVDKMKVDVEEFFKLPLEEKPPYSQPLPGVLEGYGQAFVVSSEEQKLD  
WGDMLFLHAQPVVGRNMTLWPKHPTSFRATLDKYSSELQRTVCLIECMAKNLGFVDPEKLTSMFEIGWE  
GVRMNYPPCVVNADKVLGISPHSDATGLTLLIQVNEVQGLQIRKNGNWVPVKPIPGAFIVNIGDMIEIM  
SNGKYKSI EHRAVIDPLKERM SIAAFHSPPEKTIGPLPEMVKMSGGVEKYKTLNYVEYLKLLYSSKLDGK  
NLLEFMKLDQGM

>CCHDIOX6

MEEEKEELSPKALVNFSSLLVPSVKELAKKQLTEIPSR YIRFDQESPVTTFQPTCLPSVPVIDIHSLLF  
QESEAATASELNRLHSACKNWGGFFQIINHGVSSSLIEKIKLEIKAFFELPMEEKQKLWQQPCDQEGFGQL  
FVVSSEEQKLDWCDMFFIRTLPTTIRKPHLFEKLPVPLRETLNYSLEMQLAKTVLEQMAKALKMDAEEEM  
RQLFDDGFQAMRLNYYPLCSQPKVLGFTPHSDSCALTILLQLNETEGLQIRNEGKWIPVKPLPNAFVVN  
IGDIMEIVSNGVYRSIQHRAVVNSMKERLSFVTFYSTNIDAEIGPACSLIEPHKPALFKRVMTEKYYKDF  
FAREIKGKSYLDSMRINVSSES

>CCHDIOX7

MGFVKNLSESTILTSIPSDYDFSTINS DYSPSVTTEESIP IIDFSLLTSSSPQQRSQIVQDLGNACLQW  
GFFMVVNHGIPERLKEEVFQSCQDFDLSEDEKLG YTAGKHVLDPIRCGTSFNASVEKVFVWRDFLKV FV  
HPEFHSPKPIGFSGISNEYSKRVREIARELLKGISESLGLEASYIEKAMELQSGLQIFVANLYPPCPQP  
ELAMGMPPHSDHGLLTLLMQNDVGG LQVKHKGKWVHNPLPNSILINTGDHLEILSNGKYKSVLHRATVN  
NNTTRISIAVAHGPSLDTLVTPAPGLVISEIHPPRYHGMKYKEYLELQSNQLDGKSCLDRVRVLNV

>CMUDIOX1

MTTWVPSLPV PNVQDLAAKKLEEV PDRYIQREAESENV AIELSDQVPVIDLQRLHHDP SIA SDEMAKFH  
MACKDWGGFFQLINHGMD EELMRKMVN NLEEFFNL PLEEKKAYAQTPESEFEGYQAFVASKEQKLDWSDML  
GLQTLPVNRRAMRVWPKKPLSFSETIDKYAFGMQKVTFCLLSLIAKNLGVPEPQKLT SIFEDGIQGTRMNY  
YSPCPQSDKVLGLSPHSDANLITLLIQNNDLPGLQIKIDGKWIPIKPI SGAFIVNIGDSIEILSNGLYKS  
IEHRAVIHADRARIS IAGFQAPRSGV VIEPLPELLEKENVVANYKSV DYEYLRQYFSAKLNKSM LDI  
KLKIHKDEERA

>CMUDIOX2

MESLSIDASSVLDLVSKNPETIPSR YIRPENDHQIVVTSIHNEVPVIDLSKLI F DANNGGVSDEEMKNLH  
LACQEWGGFFQLVNHGVDEEAMK KIVEDVREFFELPLK LKKECSSEMEGYGQAFVLS EEQKLDWGD MFFLF  
TGPDSIKNYEVWPAHRPFTFRETINKYSSEMEKIKIILVGLMAKNL GIDQDKFINLFKDG VQSMRMNYY P  
PCPDPSKVLGISPHSDATGITILLQLNEVDGLQIRHGGNWVPVKMLPGALLVNIGDIIEILSNGIYNSIE  
HRVVINKEKERMSVATFHETHNSVDIGPLPELVINGETKYKSVAWDEFSELFLSQKLDGKSLLDALKLN

> CMUDIOX3

MLREKMTIEAKEKLISIH SISEEDQLISM DHQVPLTLGSSLLVPSVQEMARKSALDAIPKRYIRDDL RQE  
LMNVTRSD ETDRL LPSLPVIDMKALLDERDVELEK LHSACKDWGGFFQLVNHNV DENLVEKVKGVIQDLFN  
HPIEEKQKYWQKPGDLEGGFQAFVVSDEQKLDWADM FYMVTQPEHSR KPHLFLLPHPIRET FEEYSIEL  
KNLALKVLKMMAKALKMDVEEMNSLFAEGKQAFRINYYPPCPQPEKVI GLTPHSDAVGLTILLQVNDVEG  
LQIRKDG MWVPVKPLPNGFIVNVGDILEMVTNGNYRSIEHRAVVNSSKERLSIATFYSPGVDAEIGPAPS  
LINSNSPPIFKRINGEDYFKGLFARELAGKSYLDCMRI

>CMUDIOX4

MATEQEEYFPSLPV PNVQDLSSN LANDIPDRYIRPEFQSEFV CDDKSFAIPVIDFSRILDEKFRDH EMTK  
LHAACQEWGGFFQLINHGSEEAIEEIKSHVEEFFKQPLAAKKAYTQERN SIEGYGQAFVQSEDQKLDWGD M  
FLVRAFPVRKRNRMRFWPNYPSTFRGTLDRYSSEVRKLAIGLLGLMAENLGLDAEKL TGMFGDLQQSLRMN  
YYPQADKVVGISPHSDPLPLTLLIEANNVQGLQIRKNSI WVPVHAIPGAFIINIGDMLEIWSNGKYK  
SIEHRVVVNPYRERLSVA AFHAPNEDSIVGPLQDLVNKEGAKYKSIDANSYYKLN TIQGMHANEMKLV  
TPTTN

>CMADIOX1

MSCSCPQVDWPEPIVRVQISISDSGSPVIPDRYIKPPLERPSKLGARTSITSTNDQDVLNIPLIDLGLL  
IQDEDNLILPDSILNQICMACQNWGFFQIVNHGVSDDLHRVREVVREFHFLPYEHKQVYANSPKTYEGY  
GSRLGVEKGAILDWSDFYLHYLPQCLKDPNKWPALPTSCREVVDEYCCQLVKLSKNLLKILSITLGLGE  
SYLENAFGGEEIGACMRVNFYPKCPQPDLTGLSSHSDPGMTLLLDPNQVVGLQVRKDDNWVTVKPAPN  
AFIVNIGDQVQVLSNAIYKSVEHRVVVNSVEERVSALFFFNPRGDLPLQPAKELVTSRDPALYLPMTFNE  
YRLYIRTQGPRGKVYMESLKSPR

>CMADIOX2

METPKPVTLGGSLPVPSVQELAKQPLLQVPPRYIRSDQDLPIISESDDVSATFQTPVIDLKSLLCGDTE  
LERLHSACREWGFFQLVNHGNTSLVEKVKSEIQDFFKLPMEKKKYWQKEGDVEGFGQDFVISEEQKLD  
WADIFFMITLPRHARKSHLFPPLPLRETLESYSSEMKNLAMSLEFVMSKALDVETQLVTELFEDGMQN  
MRMNYPPCPQPELVVGLTPHSDAVGLTILLQLNEMEGLQIKREEKWVPIKPLPNAFIVNIGDILEIVTN  
GIYNSVEHRAIVNSKKERLSIATFHHSIKLGGEGIPCLVTPKTPALFRVTGVAEYKHYRSLTHGKSY  
LDFMRIEGNHDS

>CMADIOX3

MAPVPISSIRVGQIDDVQELRKSIPERYVRDIAERPRLAKLQPSLPMQIPVIDLSMLDETNTYQSQ  
KELSKLAASCRDWGFFQVINHGIDTDLKTIKQVATEFFMLPLAEKQKYPMLPGTVQGYGHAFVFSQK  
LDWCNMLALGVEPFFIRNPKLWPTNPAKFSETLETYSTNIRKLCNLLRFIAMTLGLNQDTFNKMFGEAV  
QAVRMNYPPCPRPDLVGLSPHSDGSALTVLQQTGSSVGLQILKDDKWVPVQPLHNALIINIGDTIEV  
LSNGIYKSVEHRAVTHKKKDRLSIVTFYAPSYEIEIGPLPELIGQNQPCMYRRFNHGEYSKHYINNKLEG  
KKTLDFAKIQTCLSS

>CMADIOX4

MTMEPTILETKTEEKISSESTTYQKGVKHLCECGVSKVPNKYIFPVSERKGEKPKNSGSNLKLPVIDFDQ  
LKGSNRCQVLNLSKACEDFGFFQVINHGIPDDIIQNMIIETSRGFFELPEERSKYMSTDVRAPVRYGTS  
FNQINDSVYCWDFLKLACHSLPDSVPHWSSPADLRDAASTYAEENKSLFKMIMEAILESGLIRTET  
DDDNDVLKEFEDGSHLTVINCYPSCQPELTLGMPHSDYGLTLLLQDEVEGLQIQHKGWVTVEPIPN  
AFVINIGDHLEIFSNGRYKSVLHRAIVNSTKCRTSIASLHSMPPMMNMVKPSPKLINEENPRRYKDTNFAT  
FIDFIASNDLKEKSFLDSRKL

>CMADIOX5

MTPLMETPPKVISLGSLLPVPSVQELVKQPLERVPPRYVQQDQDSSRLVISSDDSLVLPVVIDLQN  
LLSPEIIGDLELEKLDACKEWGFFQVVNHGITNTLVEKVKLEVQDFFKLPVEEKQKYEQIRGEIEGFG  
QAFVISKQKLDWADLFFMVTHPLHLRKPFLPKLPLPLRDTLESYTTLELRNLTMTLLESMAKALRLET  
EMTDLFEDGRQSMRINYPPCPQPELVIGIRPHSDATGLTILLQLNETEGLQIRKEGIWIPIKPLPNAFI  
VNIGDMLEIVTNGVYRSVEHQVTVNKMKERLSIATLYSPGLEREISPLPSLITPQTPTLFFKIEVEKYLK  
ELFNRELNGKSFLDVMRTEGGGKE

>CMADIOX6

MEFSLSGGTSVGVQTLAESGLDHVPSRYIQPPENRPVTSFSCRKTSDSGIPVIDLNFEPKRSDDVLQEL  
RRACRDWGAQVRNHGVPKRLLLEDMIKVLGSLFFKESVVEEKCKYSCDPNSAASEGYGSRMLVKEDTVLDW  
RDYFDHHTFPLSRNPNRWSSESPSNYRGVVEEYSDHIKVLALKLMSMISESLGLQSSCIEDIVGEVYQNI  
TISYPPCPQPELTLGLQAHSDIGAVTLLIQDDVGGLQVLKDDWVTVQPLSDAIVVILADQTEIMTNGQ  
YKSSQHRAITNSHRARLSVGTFFHDPKTRKIAPAAPLIRKDSAPAKYKEVIYGDYVSSWYTKGPEGKRNID  
ALLLHQ

>CMADIOX7

METPPKQVTLGVSLPVPSVQELAKQPLSQVPPRYVRSDDQDPIIYESHHDVSSSTTTVQNVPIIDLKSL  
LSQGPIGDSELERLHFACREWGFFQLVNHVNTSLVEKVKTEIQDFFKLPLEEKKYWQKEGDVEGFGQA  
FVISEEQKLDWADLFFMITLPRDARKSHLFPPLPLRETLESYSSEMKNLAMTILEVMSKALHIETKLM  
TDLFEDGMQNMRMNYPPCPQPELVIGLTPHSDSVGLTILLQLNEMEGLQIKREGKWVPIKPLPNAFIVN  
IGDILEIVTNGIYNSVEHRAIVNSKKERLSIATFHHSIKLGGEGIPCLVTPKTPALFRVTGVAEYKHYR  
YSRTLHGKSYLDFMRIEGNDS

>CMADIOX8

MEGSHLPAEETSSLEKRVQELAINCKEPPRYICKTDNEEENQRPADDHLSYSVPIIDLRFSSRSITE  
KEEEMEKLRSALNSWGLFQAIGHGIPKNLLDDVHNVTQKFFELPIEEKQKYTKADSEIVDLQGYGCDRIV  
SEDQVLDWSDRLYLLVDPEEQRKLKLWPEPPSNFRNTLHEYSAKSSSVAELILKVMAESVGLLENNFLSQ  
IGEQVLTARFNYYPPCSRPRDRVYGIKAHADGGALTILLQDKEVEGLQVLKDDRWINVPSIPYALLVNVA  
DLMEIMSNGLFKSPVHRVVTNTERERISLAMFYSPAFDKEVEPAAGLIDSKPRMFRKVNKNYLEVFFP  
RYLQ GKRAIDWAKV

>CMADIOX9

METPKPVTLGVSLPVPSVQELAKQPLSQVPPRYVRSQDPPPIIYESHHDVSSSTTTVQNVPIIDLKSLLS  
QGPIGDESELERLHFACREWGFFQLVNHEVNTSLVEKVKTEIQDFFKLPLEEKKKYQKEGDVEGFGQAFV  
ISEEQKLDWADLFFMITLPRDARKSHLFPPLSLRDTLESYSSEVKNLAMTILEVMSRALHIETKLMTD  
LFEDGMQTRMNYPPCPQPELVIGLTPHSDSVGLTILLQLNEMEGLQIKKEGKWLVPKPLSNAFIVNIG  
DILEILTNGIYNSVEHRVAVNSMKERLSIATFHNVKLDGAVGPIPCLVTPETPALFKTVGAAEYFKHLFS  
RKLHGKSYLDSMRI

>CMADIOX10

MTAKLQRDSREREREERVRKEASMDQTTKSVRIGTCLLVPSVQELAKQHFVKVPPQYICPNQDPAPIFSQ  
TLETHSLFVPTVPIIDLQRLLSQEPHGDLELGRDLSACKDWGFFQLVNHGINSSLIEQVKSEVQDFFRLP  
MEEKKKFWQNEGDIEGFGQKFFVSKEQKLDWSDMFFMITLPLHSRKPHELLPKLPLPLRVTIYESYSEELKR  
LTMTLVELIAKSLQIEPKLMTLFEEDGRQAMRMNYPPCPQPELVMGIPPHSDSVGLTILLELNEIEGLQ  
IKKEGMWVPIKPIPGALLVNIGDMLEIVTNGIYQSVEHRATVNSLKERLSLATFYSPGLEREISPAPSLI  
TPQTPALFKSIGVGNLYTKTRFNKDQLHGKLLHSLRNVTG

>CTRADIOX1

MKVGSLPVPNVQDLASKKLKEVPDRYIQREPESEHVSFEMSDQVPVIDLERLLDDEPFIIYSDEMAKFHLA  
CKDWGFFQLINHGVD EELLKKMVSNVEEFFKLPLEEKKAYAQLPDDLEGYGQAFVVSEEQKLEWSDILL  
RTL PVSIRNLRWFPEKPSFSETLDKYAFAMEKVTFLLLNLIANKLGVEPKMVTISIFEDGIQGVSSNYYP  
PCPAPEKVLGISPHSDASMITLLIQNNELPGLQIRKNGNWVPIKPIPGAFVNIIGDAIEIMSNGLYKSIE  
HRAVIHPDKERISIAGFQDPRSGVLVGLPELLKKNVGNANYKTVNFDEYLRQYISAKLDGKTMLDLVKL  
EKPEIQEGA

>CTRADIOX2

MDQKAQVTVTLGSSLLVPSVQEMARKALNTIPERYIRDDLEPHFVTISDPTLLPSVPIIDMKALLEGELV  
DSELEELHSACKDWGFFQLVNHVSVGSLVEKVKGVIQEFFNLPIEEKQKYWQKPGVEGFGQAFVVSEEQ  
KLDWGD LFFVLTQPAYLRKPHLFPKLPFRDGLSLELKSAMTLIKVMAKALQIETKVIEELFEDG  
MQSMRMNYPPCPQPEQVIGLTPHSDAVGLTILLQVNEEGLQIRKDGMMWVPKPLPNAFIVNVGDVLEI  
VTNGIYRSIEHRVAVNSKERLSVATFYNPRIDGEMGPAPSLIKSDSLALFRRISVQDYFKGLFARELVG  
KSYLDSMRI

>ECADIOX1

MEITQKEIKLGKSLLVPSVQEMVKQPIAEIPRYLQPDQNTPTSSDVSLPQLSVPIIDLESLLTPGSVG  
DLELDRLDSACKEWGFFQLINHGVSSSLVEKVQLETQDLFRLPMIEKKKYWQTEEEVEGFGQAFVVSEEQ  
KLDWADIFYLTTLP IHGRKPHLFPKLPFRDGLSLELKSAMTLIKVMAKALQIETKVIEELFEDG  
LQSMRMNYPPCPQPDVIGLKSHSDSVALTILLQNEVEGLQVIKDGKWPVKPLSNAFIVNIGDILEI  
LTNGIYRSVHHRAIVNSTKERLSIATFLNPNPEGEISPIGSLITPSTPALFKTVGVKQYLQDLFTRELDG  
KSYLDCMKIDGNTT

>ECADIOX2

MDISQKEVKFRSLLVPSVQEMVEEPIGEIPSRYLQPGQNTPIITTDVSLSVPIIDLESLLTPGSIGDLEL  
EKLDSACKEWGFFHLINHGVS SSMVERVQLETQHFFRLPVVEKKKYWQSEEEVEGFGQTFVVSEEQKLDW  
ADV FYLTTLPVHARKPHLFPKLPFRDGLSLELKSAMTLRVMKALQVETKELEELFDEDGFQS  
MRMNYPPCPRPDLVVGRLPHSDSTALILLHVNEVEGLQVIKDGKWPVKPLSNAFLVNIGDVLEILT  
NIYRSVEHRATVNSTKERLSIATFLNPKLEGEISPIKSLITPNNPALFKTIGVKQFYQDLVRELNGKSH  
LDFMKIESNNTA

>GFLDIOX1

METAKKPIIIGGSLLVPSVQELAKQPLVQVPTRYVRSQDSPTLSDDISTIPTVPVIDLQCLLSPEAIGD

SELEKLHSACQEWGFFQLVNHGVSPSLVEKVKMEIKDFFRLPMEEKKNKYWQEERQVEGFGQAFVVSKEQK  
LDWADLFFMVTPLPHARKPHLFPKLPPLRETLEFYSELKILTMTLLKMMCKALQIGTKEMTELFEDGM  
QSMRMNYYPPCPQPELVIGLTPHSDSTGLTILLQLNEMEGLQIRKDGWVVPVKPLPNAFIVNIGDALEIV  
TNGIYRSVEHRAMVNSMKERLSVGT FHGPRLEDEIGPLPNLINPDRPAMFRRVRVEEYFKKLFTRALDGK  
SFIDSMRIEMGCAEAKPA

>GFLDIOX2

METAKKPIIIGGSLVPSVQELAKQPLVQVPTRYVRSDDQSDPTLSDDISTIPTVPVIDLQCLLSPEAIGD  
SELEKLHSACQEWGFFQLVNHGVSPSLVEKVKMEIKDFFRLPMEEKKNKYWQEERQVEGFGQAFVVSKEQK  
LDWADLFFMVTPLPHARKPHLFPKLPPLRETLEFYSELKILTMTLLKMMCKALQIGTKEMTELFEDGM  
QSMRMNYYPPCPQPELVIGLTPHSDSSGLTILLQLNEMEGLQIRKDGWVVPVKPLPNAFIVNIGDILEIV  
TNGIYRSVEHRATVNSMKERLSIATFHSPGLEDEIGPIANLITPDRPAMFRSVRAEEYFKKRFTRALDGK  
SFIDSMRIEAGCGEGKPT

>GFLDIOX3

METTKMPSSYVPVPSVQELATQIDDLVQIPARYVRSDESSTIFSDEISTNIPSPVIDMQCLLSLETIN  
GVSDDELDKLHFACQEWGFFQLVNHGVSTALVEKVKSEIQDFFKLPMEEKKKYSQKDGVEGFGQVQCVVSE  
EQKLDWADIFFMFTLPLHARHLFPELPLPLRETLESYSELKSITMTLLRMMAKALQIETKDMTKLLEDG  
VQSMRMNYYLPCRPPELVIGLTPHSDATGLTILLQLNEMEGLEIRKDGWVPIKPLPNAFIVNIGDILEI  
GTNGIYRSVEHRATVNSTKERLSIATFHNPQLQDEICPLPNLITSDRPAMFRSIMTEEYNTKLLTRALDG  
KSLDLSLRIEAKCEDDGN

>GFLDIOX4

METAKKPIIIGGSLVPSVQELAKQPLVQVPTRYVRSDDQSDPTLSDDISTIPTVPVIDLQCLLSPEAIGD  
SELEKLHSACQEWGFFQLVNHGVSPSLVEKVKMEIKDFFRLPMEEKKNKYWQEERQVEGFGQAFVVSKEQK  
LDWADLFFMVTPLPHARKPHLFPKLPPLRETLEFYSELKILTMTLLKMMCKALQIGTKEMTELFEDGM  
QSMRMNYYPPCPQPELVIGLTPHSDSTGLTILLQLNEMEGLQIRKDGWVVPVKPLPNAFIVNIGDMLEIA  
TNGIYRSVEHRATVNSLKERLSIATFHNPPEDEICPLSNLITSDRPAMFESIRAEDYTKKLLTRALDGK  
SLDLSLED

>HCADIOX1

MEEPKLSYGSSILVPSVQELAKQALASPPRYIKPHQDPPPIISYSSLIPPIPVIDMQKLLYGEDMDSELE  
TLHSASKEWGFFQLVNHVDVNTILVEKVKHEIQEFFQLPLEEKKAYWQKEGEVEGFGQAFVVSNEQKLDWG  
DMFFMLTLPIYARKPHLLPQLPLPFRDMDTYSLESKNLAMKILEIMEKALKMEVNEMTNLFEDGMQSMR  
MNYYPPCPQPELVIGLTPHSDTAALTILLQVNEVEGLQIRKEGMWIPKPLPNAFIVNIGDMLEIITNGI  
YRSIEHQATVNSEKERLSIATFYSPRHNVEMGPAQSLVTPQTPALFRRIGVEEYSKGLFSRVLDGKSYLD  
VMRTENGKNNSN

>HCADIOX2

MEEPKLSYGSSILVPSVQELAKQALASPPRYIKPHQDPPPIISYSSLIPPIPVIDMQKLLYGEDMDSELE  
TLHSASKEWGFFQLVNHVDVDTILVEKVKHEIQEFFQLPLDEKKFFWQREGELGFGQAFVVSDEQKLDWG  
DMFFMFTLPIYARKPHLFPQLPLPFRDMDTYSLELKNLAMKIIIGMMEKALKMEVNEMTNLFEDGTQSMR  
MNYYPPCPQPELVIGLTPHSDSVGLTILLQVNEVEGLQIRKEGMWIPKPLPNAFIVNIGDILEMVTNGK  
YCSIEHQATVNSVKERLSIATFYSPRHVEIGPAQSLVTPQTPALFKRIGMEGYLKGLFTRQLDGKSYLD  
VMRIENGKNNSN

>HCADIOX3

MEEPKLSYGSSILVPSVQELAKQALASPPRYIKPHQDPPIVSNSTLIPTIPVIDMQKLLYGEDMDSELE  
TLHSASKEWGFFQLVNHVDVDTLLVEKVRHEIQEFFQLPLDEKKFFWQREGELGFGQAFVVSNEQKLDWG  
DIFFMFTLPIYARKPHLFPQLPLPFRDMDAYSLESKNLAMKILEIMEKALKMEVNEMTNLFEDGTQSMR  
MNYYPPCPQPELVIGLTPHSDTAALTILLQVNEVEGLQIRKEGMWIPKPLPNAFIVNIGDMLEIITNGI  
YRSIEHQATVNSEKERLSIATFYSPRHNVEMGPAQSLVTPQTPALFRRIGVEEYSKGLFSRVLDGKSYLD  
VMRTENGKNNSN

>JDIDIOX1

METEMINTWEGGSLPVENVQALAAKELKDIPDRYIRPELQSDHVSIDESREIPVIDLSRLLDEQVSLDE  
LAKFHSACEGWGFFQLINHGVSSEIINKMKIDVQDFFSLPLEEKKACSVATSIQGYGQAFVVSDEQKLD

WADMLFILPLPVRERNMRFWPNTPTSFRETLDKYSLELQRVTVSLIGLMARNLAVEPEKLTNMFENGLQG  
VRINYYPPCPQADKVLGLSPHSDAVALTLIQVNDVEGLQIRKRGNWVPVKPIPGAFIVNIGDIMEIISN  
GKYKSI EHRAIINPKKERLSIAAFHSPNLSTLIGPLADLVNESGEHYKTIMFEDYLKHI VSSKLDGKSTL  
DYLKLD

>JDIDIOX2

MGTEVPMPSVENVQDLATKILDVIPSRYIRPELMTDVVSSIDEESMIPIIDLSKLTDDHVSQAELEEFHL  
ACQNWGFFQLINHGLKEDVLEKLMVDTEFFNLPIEAKKEFSQEPGQMEGYQAFVFSDEQKLDWGDMLY  
LVTQPEAARRMKLFPTCPSTFRDTIANYSLESERVKMVCVLGVMAKNLGIEREKFTNTFEGGIQSMRFNYY  
PPCLEEDKVLGISPHSDATGITLLVQVNVHGLQIRHEGRWVPVVLATDAILVNIQDVLEILTNGKYKSI  
EHRVVINKNERLSVAAFHEVNENATVGPPELVKDGEECYQSFSFDEYAELLIGEKLKSLIERMRLK  
K

>MAQDIOX1

MAPTPISPLQVGHIIQVQLRQVRLKVRKTIPRRYIRAVAERPISAATSTMHIPVIDLSKLIEGNSDQSQMEL  
SKLASACEQWGFQVINHGIDISMMENMEKVGEFFMLPVEEKQKYPMAPGTIQGYGQAFVFSDEQKLDW  
CNMLALGIEPHFIRNPKLWPTNPANFSETLETYSEEVKRLCQNLRFIATSLSLRDETFFNDMFGVPVQAV  
RMNYYPPCQRPDLVGLSPHSDGSALTVLQQAAGSSVGLQILKDDKWVPVQVVPNALVNIQDITLVLTN  
GKYKSV EHRVAVTHKDKDRLTIVTFYAPDYEIELGPLPEFVSENRPCMYRKYNHGEYSRHYVTNKLQGGKT  
LDFARIQTEFSA

>MAQDIOX2

MEVGLAETLQYNVQLLASKKLDVIPSRYIRPELAADIICMDKASVIPVIDFSKLCDDTFSQDELEKFLA  
CQDWGFFQLVNHEVPKEVLEKVKTDLEFFNLPIEEKMACQPGQEEGYGLVVMFSDQKLDWGDMLGIV  
TQPETTRNVNVWPNPLTFRETIAQYSLELQKIKTCILGLMAKNLGIPEKFTNMFEGGMQSMRINYPP  
CQKDDKVLGLSPHSDSNGITFLIQVNDVQGLQIRHEGCWVPVVLSTDAILVNIQDVLEILTNGRYKSV E  
RVVINKNERLSVAAFHEL NENETIEPLQELIKEGEDKCYRSLSFAEYQKLESSHYLSHYLDGKTLIEKM  
KLLK

>MCADIOX1

MSSNTGHFGGSLPVENVQALASQELKEVPSRYVRPELAFDVVSSIDESLQIPVIDLFRITDQRYARDELAK  
LHSACEDWGFQVINPQVPHDMIENMKADTEEFFKLPLEVKKAYSQLPNSIEGYGQAFVVSEEQKLDWGD  
MLFFFQPLNERNMRIWPNHPDSFRETLDKYS AELQRVALLGFLAKNLGLDPEKFINMFENGMQGV  
NYYPPSPQAEKVLGISPHSDADSLTLLQVNEVQGLQIRHNGIWPVPIEPIGALIVNIQDVIEIMSNGKY  
KSI EHRVIVNTKKERLSIAAFHTTKAGTTIGPISDLVKENGANYRTVSD EFLRQVITNKLKDGKSVLDHM  
KLLK

>MCADIOX2

MSSLETMRESTVPLAVENVQVLASKNLKEIPLRYIRPEHELEISSINEITEASSSDVPVINLSRLTDDDE  
QFYQEEMGKFHFACQEWGFFQLVNQGAEDVMEKMIRDVSEFFKLPFEKKACSQDADQMEGYGQSFVFS  
EEQKLDWGDMLFLTQPLLSRNFKESVSRYSEMERTIKILVGMGKNLGINQEEFTNMFNNGVQSMRFN  
YPPCPQASKVLGVSPHSDATGLTVLLQLNQVQGLQIRHDGQWVPVNILPDALLVNIQDILEILSNGRYK  
SIEHRVVINKERMSVAVFHETNKAETGPLPELLNNEGETDKYRSVSFEGFVNLFSRRLKDGKSLVD  
FMKLLK

>MCADIOX3

MADEKAKEAVPVTLGSSLLVPSVQEMARKAISTVPERYVRNDLDPFSTNPTLLPTLPTIDMNSLLDGES  
ADSELEKHLACKDWGFFQLLNHGVSASLVEKVRIGIQDFNMTIEEKQKFWQKPGVEVEFGQAFVVSEE  
QKLDWGDLLFFCTTQPAYQRKPHLPMLPQPFRETLEEYSLELKNLAMTLIEMMAKALKMDIEDMKLLFED  
GMQAMRMNYYPPCPQPDQVIGLTPHSDAVGLTILLQVNEMEGLQISKDGMWVPVKPLPNAFIVNIGDILE  
IVTNGIYRSIEHRATVNASKERLSIATFYNPKFDGEMGPAPSLIKKDSPPFFIRMRVEEYFKGLFARELV  
GKSYLDSMRIRYKSGIV

>MCADIOX4

MTVGPLTVPNVQDLASNKLDIPHRYIQREPESEHVLFEISDEVPLIDLQKILHESFSSDEMAKLHMACK  
DWGFFQIINHGVDEELIKRMLNDVEEFFKLPLEEKKAYAQLPNSFQGYGQELVVSQEQKLDWSDMLVLHT  
LPISRNMKFWP INPASFRETLDKYTMETERVTLCLLSLMAKNLGVAEKVT SIFEDGIQAVRMNYYPPC



SQADKVLGISPHSDASIITLLIQNNQVPGLQIRKDGWVPIKPIPSAFIVNVGDVIEIMSNGLYRSVEHR  
AVIDPEKERISIAGFQDPRNGVLVGPLPELMEGNKGANYKTVSYDEYLRQYLSAKLNGKSVLDLLKLEKC  
EIKERV

>NDODIOX1

MGSEQMDEQRVFGGSLPVDYVQVLAACKLKEIPDRYIRSELEFEVVSIDLSNKIPVIDLGKLLDEQFRR  
DEMAKLHSACEDWGGFFQLINHGVSSEEIIQKMKTNSHEFFNLPLEEKVYANLPSSNEGYGQAFVSEEQK  
LDWVDMFFVTTLPLHERITRLWPNNPTSFRETLDQYSLELQRTISLAGFMANNL GVEPEKLTNMLENGS  
QGITMNYPPCPHADKVI GLSPHSDACAITLLIQVNEVEGLQIRKNGWVPIKPIAGAFIVNIGDTMEIL  
SNGKYKSNVHRAIVHPQKERISVAAFHRPNLSAMIDPLSELVKESGKHYKTILFQDYLKHYFASKLDCKS  
ALDLIKLDN

>NDODIOX2

MESKQVYKSRMLGGSLPVENVQALASKKLQEIPDRYIRPELEFDVSVNLSNEVPVIDLRKLLDEQFGCN  
EMAKLHSACEDWGGFFQLINHEVSEEIIEKMKIDLQGGFFSLPLEEKKAYGQLANSNEGYGQAFVISEEQK  
DWADRLYIVTLPVEERNMRFWPNTPTSFRETLDKYSVELQRVAVCLVGLLASNLGVEPKLTNMFDKGFO  
AVRMSYPPPCADKVI GLSPHSDAVALTLLIQVNEVEGLQIRKNGWVPIEPIPGAFIVNIGDAMEIIS  
NGKYKSI EHRAVIHPQKERISVAAFHGNL NAMIGPLSNL GKESGEHYXEVGGGQNMGKTVAIIVGGVAA  
VGFALICLMFLRSLMKKHDDY

>NDODIOX3

MAPAAIPSLKVGHIHDVQELRKARRRTIPKRYVRDIAERPITSVTSTMHIPVIDLSKLIQGDIDQSQTEL  
LKLASACKDWGFLQVINHGIDVSLLESIEKVTKEFFMLPLAEKQKYPMAPGTVQGYGQAFVSEDQKLDW  
CNMLALGIEPHFIRNPKLWPTKPAEFSETLEMYSTEIRKLCCKNLLRFIAMS LGLKDDVFNMGFGTPVQAV  
RMNYYPPCPRDLVLGLSPHSDGSA LTVLQQAAGSSVGLQIYKDDTWVPVQV PPNALVINIGDTLEVL TN  
GIYKSVEHRAVTHRDKDRLTLVTFYAPSYEMELGPLPEFIDENRPCMYRKYNHGEYSRHYVTNKLEGGKT  
LDFAKIQTKCRLKSPRFNLTL

>NDODIOX4

MESANELGG SIPVENVQALAAKDLKEIPHRYIRPELESDVVSIDKSREIPVIDLGKLLDEQFAPEELAKL  
HSACADWGGFFQLINHGASEEIIIEKMKHDIQE FFRQSLEVKNAFSQLPNSVEGYGQAFVSEEQKLDWADM  
LYLETLPISQRKVN LWPTTPTSFRETLDKYSLELQRLTICLIGLIAKNMEIEPQKMTNIFENGTQGVRMN  
YPPPCPCANQVLGLSPHSDGSGLTLLIQVNEVAGLQIRKNRDWVPVKPIAGAFIVNIGDAVEIFSNKYK  
SIEHRAVINPEKERLSIAAFHDPNLSTMIGPLPELVKENERYKTIKYKDYIKQVMASKLDGKSSLDLKLK

>NDODIOX5

MESEMKAIEVGG SIPVDNVQALATTELKEIPHRYIRPEFESDVVSNDKSGKIPVIDLCKLLDEQFSHDE  
LAKLHSACEDWGGFFQLINHGAAEEIIIEKMKIDIQEFFRQPLEVKKAYSQLPNSMDGYGQAFVASEEQKLD  
WADMLFLTCLPISQRYVTLWPTIPTSFRETLDKYSLELQRTTCLIGMMAKNLGI EPQKLTNIFENGLQG  
VRMNYPPCPQANKVI GLSPHSDGSGLTLLIQVNEVEGLQIRKNGDWVPVKPIAGAFIVNIGDAVEILSN  
GKYKSI EHRAVINPEKERLSIAAFHNP NLSTMVGPLPELVKENERYKTMKYEDYVKQVIASKLDGKSSL  
DAVKLEK

>NDODIOX6

MESETKEPKPLGGSLPVENVQALATKELKEIPHRYIRPEIESSVVSVDKSREIPVIDLGR LVSEQFSSDE  
MAKLQSACEDWGGFFQLSNHGVSSEEIIIEKMKIDLRDFFNLPLEEKKACSQLPNNTEGYGQAFVVSDEQKLD  
WSDMLFIMTLPVPERNMRFPKNPSSFRETMDKYSTELHRVTVCLTSLMAKNL GVEPEKLANMFESGSQS  
VRMNYPPCAHADKVI GLSPHSDAVGLTLLIQANEVEGLQIRKNGWVPIVVKPIAGAFV VNIIGDVLEIISN  
GKYKSI EHRAVAHPEKERLSIAAFHGPNFNAMIGPLSDLVKESREHYKTI IHEDYVKQIFASKLDGKSTL  
DFMKL DK

>NDODIOX7

MNKAKELGG SISVDNVQALATKELKEIPHRYIRPELESDVVSIDESREIPVIDLCKLLDEEFASDELATL  
RSACEDWGGFFQLVNHGASEEIIAKMKINIQE FFRQPLEVKKSFSQLPNSMEGYGQAFVSEEQKLDWADM  
LFLVSSPISERNFTFWPTNPTSFRETLSKYSLELQRTVRLVRFMAKNL GVEPDLANMFANDGSQTIRM  
NYYPPCQRDKVLGLSPHSDGSGLTLLIQVNEVEGLQIRKNGSWVPVKPVAGAFIVNIGDVIEIMSNKY

KSIEHRAVIDPVKERLSIAAFHGPNLNTMTGPLPDLVKKNEQRYMTVNYEDYVEQLVSSKLDGKSALDSM  
KLEK

>NSADIOX1

MATSNPVKYGSSKLVPCVQELAKQPMVTPARYIRLDQEPSFVSALPLDAVPVISMOKLLYGDSMELELQ  
RLHSACKEWGFFQLANHGVPAILVENIKKEIQEFFELPFEKKKFWQSENEVEGFGQAFVVSDEQKLDWA  
DIFFINTQPINSRKPHLFPNLPLPFRRTLDDYSLELKNLAMKILGWMEKALKIEGKEITELFKEGVQSMR  
MNYYPPECSDKVIGLTPHSDSIGLTILLQVNEMEGLQVRKEGKWIPIKPLPNAFIVNIGDILEIVTNGV  
YHSIEHRATVNVKVERLSIATFYSRFEAEMGPAKSLVTDQTPAMYRRIMVHEYFRQFFSRELGGRSFIE  
DMKIENED

>NSADIOX2

MGNKTNMREFGGSLPVQNVQALASQPLNQIPPRYLPELSDTVVTATDSDES LKIPVINFRLLLLDQQQ  
QADDDGSYNEMDKFHAACRDWGFQLINHGVADEVIEKMKMGTEGFFRLPLEEKNVYSQLPNNIEGYGQA  
FVVSDEQKLDWGDMLFFLSQPLHDRTLRFWPNTSSYRETLDKYSAELQKLAVSLVEMMASNLGIIPEKL  
TDMFGIDGSQGLRMNYYPCCPHADKVIGLSPHSDGTGITLLLQVNQVQGLQIRKNGNWLPIPIPGAFIV  
NIGDIIIEIMSN GAYKSIEHRAVINPEQERLSIAAFHGPR LGTPIGPLPCIVKEDEM KYKT VSHEDY LKQM  
INQKLDGKSVLDLMKL

>PBRDIOX1

MFKNQPRNIFLVPDPPSIVFSNSPLFHSINQSM EVFVSGVQTLSETGVTHVPSQYIQPPQNRPHQPTITS  
SSDSLNIPIIDLSNFPQHSNDVRELGRACSDWGAFQITNHGISNSLIKDIIDVGLTFFNECSITEKSK  
YSCDPNSAASEGYGSRMLVNEDSVLDWRDYFDHHTFPLSRRPNRWPDPFTNYRGVVEEYSNQIKELALK  
LMSMISESLGLQSSCIEDIVGEVYQNLTISYYPCCPQPELTLGLQSHSDIGAITLLIQDDVGGLEVLKDD  
KWVTVQPVSDAIVVILADQFEIMTNGKYRS AVHRAVTNSHRARLSVGT FHDPGKIRKIAPAAQLV DKDTL  
ARYKEVVYGEVSNWYSKGPEGKRNIDSLLLNQ

>PBRDIOX2

METPKSIKLGGSLLVPSVQELAQQSFAEVPARYVRDDLEPLTDL SGVSMIDQTI PVIDLQKLQSPVPIIR  
ELESEKLHSACKEWGFFQVNVHGVDILLVEKTKSEIKDFFNLP MDEK KFWQEEGDIQGFQAFVQSE DQ  
KLDWADIFLMTLPRHTRNPR LFPKLPLPLRNTMDSYSSKLSKLASTL IEMMGKALH METSVLAE L FEDG  
RQTM RINYYPPCQPKDVI GLTPHSDGGGLTILLQLNEVDGLQIRKEKIWIPIKPLPNAFV VNI GNILEI  
MTNGIYRSVEHRATI HSTKERLSVA AFHNP KVGVEIGPIVSMITPESPALFRTIEYDDY GKKYFSRKL DG  
KSSLDFMRIGEGDEENKAT

>PBRDIOX3

METPKLIKLGGSLLVPSVLELTKQSPA EVPARYIRNDLEPMTDLSSASLTDQTI PVIDLQNL LSPEPELE  
LEKLHSGCKEWGFFQVMNHGVDILLVEKVKSEIQGFFNLPIDEKNKFWQEEGDLEGYGKAFVHSEDEKLD  
WADMFFILTQPQYMRKPRVFPKLPLRLRETIESYSLELSKLGTL LLDLMGKALQIETGVMSEL FEDGRQT  
MRMNYYPCCPQPEHVIGLTPHSDGGALTILLQLNQVDGLQIRKEE IWPVIKPLPNAFV VNI GNILEIMSN  
GVYRSVEHRATINSSKERLSVAIFQSPKHGTEIGPILSMITPEAPALFKTIPYEDYLRKFFSRKLGGKSF  
VDSMRIGESDEDNNTA

>PBRDIOX4

METQKQENFGASLSVPNVQELAKQSPEQVPDRYIRSDQDSSTNISCPSMTDQIPVIDLQSLSPDPIIGE  
LELERLHSACKEWGFFQVNVHGVDNLLVEKVKSEIQGFFNLP MDEK KFWQEEGDFEGFGQAFV FSEDQK  
LDWGDVFFILTQPQHMRKPR LFPKLPLPFRKTI ESYSLETNKL SMTLLELM EKALKIETGVMTEL FEGGI  
QRM RMTYYPPCQPKHVIGLTPHSDPDALTILLQLNEVDGLQIRKEKIWPVIKPLSNAFV VNI GNILEIM  
SNGIYRSVEHRATVNSTKERLSVATFHSPRKDEIGPILITPETPALFRTSGFEDYFRKFFAHKLNKGSF  
LSSIRIGETDEGNNTA

>PBRDIOX5

MEAPKLIMLGGSFLVPSVQELAKQSLAEV PVRVYVRDDQDTLGNINITPMSMIDQSIPVIDLEKLLSPEP  
IVGELELERLHSACKEWGFFQVNVHGVDNLLVEKVKSEIEGFFKLP MDEK KFWQEEGDIEGFGQV FVHS  
QDQKLDWGDMLMQLTLP RHRKPR LFPNLPLPLRQTIESYSSEL SKLVLTLDLMGKALQMESGVLTELF  
ENGIQRMRMNYYPCCPQPEQVIGLTPHSDVGGTILLQLNEVDGLQIKKDKVWVPIKPLANAFV VNI GNIGDA  
LEIMSNGIYRSVEHRATINSTKERLSIATFHNP RADREIGPIPSMISPETPALFKTTGYEEYFKKFFSRK

LEGKSFLDSLRIREGDEHCGRLDVKGPCN

>PBRDIOX6

MEIPNPIKIGSSLLVPSVQELAKQSFAEVPARYIRNDVDPLITKLSDVSLIDQTVPVIDLQKLLSPEPIV  
GELELERLHSACKEWGFFQVVNHGVDNLLVEKVKSEIQGFFNLPMEEKKKFWQEEGDFEGFGQMFVQSEE  
QKLDWGMFFILTQPQHMRKPRLFSKLPLPLRETIESYSLELIKLGTTIIKLMKALQIDAGVMAELFED  
GIHTMRMNYPPCPQPEHVIGLTPHSDGGGLTILLQLNEVDGLQIRRENIWVPIKPLPNAFVNVIGDILE  
ILSNGIYRSVEHRSTVNATKERLSVATFQNPQKQESVIGPNMITPERPALFRKIVYKDYMKKLF SRKLDGK  
SFLDSLRIEGEDERP

>PBRDIOX7

MGEVDAAFVQALEHRPNPNNIVEAGGIPLIDL SPLNDFCHSN DENSAHDSARHTDLVTKIGRACKEWGFF  
QVFNHGVSSDLQQGVEAAVKKFFDLSS EKRKVKRDEVNPMGYDTEHTKNVRDWKEVDFTVKNPTLLP  
ASHHLEDQELQELRNQWPDYPPRELREVCEEYASALEKLSFELLKLI ALSLGLPEKRLNGYFNDDHTSFIR  
FNHYPPCPEPHLALGVGRHKDAGALTVLAQDDVGGGLDVKRKSDGEWVRVKPIPGSYIVNVGDIIQVWCND  
KYESAHRVTVNSKRERFSIPFFFNPSHHVMVKPLEELVDYQNP SKYKEYNWGKFFKTRKISNFKKLD AE  
NIQIYHFKRSLV

>PBRDIOX8

METLKT VKPGGSLFIPNGQELAKQSLEEVYVGNQDQTM LLIQOTIPVIDLQKLLSPEPITGDMELDKLHS  
ACKEWGFFQVVNHGVDILLVEKVKSEVHDFFNIPMDEKKPFWQEEGDL EGFQV FITSEDQQLDWGDMFF  
MVTLPKHMRKPRLFLKLPLPLRETIESYSLKLSKLGVTLVELMGKALQMEDRIMSEL FDDGRQTMRMNYY  
PPCPQPEQVIGLTPHSDPGGLTILLELNEVNGLIRKENIWVPIIPLPNAFIVNIGDILEIMSNGIYHSVE  
HRATINSTKERLSVAMFNSPKVDTEIGPIHSMITPETPALFRTIGYDEYLKIFFSRKLDGKS LLESMKI

>PBRDIOX9

MSYESLPPKVVVPSVHELIEKITEIPNPYIRTSCVDHEDHHTDQSTADHNIPVIDVQGLLSGESVLADS  
EFEKLHSACQDWGFFQVVNHGISSLVIANLKSEMRNLFELPLEERKKICQEPGDPMAEGFGQLFIVSDDQ  
KRDWSDTFYLTALPTKLRKPQLFAGIPVLMRESLEAYSSGLKDV TMILLGKMAKAIKMSDEMEELFND C  
LQRMGLNYYPPCPKSEQVIGLSPHSDAGALSIVLQLNETEGLQIRKDGKWTVKPIPGALIVNLGDMIEI  
LSNGAYPSIEHRVMVNP AIERLSIATFHATNPDAEFGPALSLIDPPHKPALFRRETVEKFYTNFFANKLN  
GKTTNLD FMRIQNGDQSSRLISGYRP

>PBRDIOX10

MEAPKLIMLGGSLFVPSVQELAKQSLAEVPVRYVRDDQDTLGN NINITPMSMIDQSIPVIDLEKLLSPEP  
IVGELELERLHSACKEWGFFQVVNHGVD SLLVEKVKSEIEGFFELPVDEKKKFWQEEGDIEGFGQIFVHS  
EDQKLDWADM FYMLTLPNMRKPRLFPNLPLPLRQTIDSYSSEL SKLVTLVDLMGKALQMESGVLTELF  
ENGIQRMNYYPPCPQPEQVIGLTPHSDVGG L TILLQLNEVDGLQIKKDKIWVPIKPLRNAFVNVGDA  
LEIMSNGIYRSVEHRATINSTKERLSIATFHNPRADREIGPIPSMISPETPALFKTTGYEEYFKKFFSRK  
LEGKSFLDSLRIEGDEHCGRLXVKGXCN

>PBRDIOX11

METPKLMKLGGS L FVPSVQELAKQSLAEVPARYVRDDRDMVGN IINVT PMSMIDQSIPVIDLEKLLSPDL  
IVGELELERLHSACKEWGFFQVVNHGVD SLLVEKVKSEIEGFFELPMDEKKKFWQEEGDAEGFAQFFVQS  
EDQKLDYSGDMFFMLNLPQHMRKPRLFLKLPLPLRETIESYSLKLSKLGVTLVELMGKALQMEDRIMSEL  
FDDGRQTMRMNYYPPCPQPEQVIGLTPHSDPGGLTILLELNEVNGLIRKENIWVPIIPLPNAFIVNIGDI  
LEIMSNGIYHSVEHRATINSTKERLSVAMFNSPKVDTEIGPIHSMITPETPALFRTIGYDEYLKIFFSRK  
LDGKS LLESMKI

>PBRDIOX12

MGRTVKDLTDTSDLISIPSEYVFPTNPEDLEEAEQQIPIIDYLLTSGSPEQRSLI IENLRSACLEW GFF  
MVINHGVPSQLINEMMNLCLGFFDLSPNEKSDYVGKHLNPIRCGTSFN TSVEKIYFWRDYLKILVHPEF  
HAPLKPHAFRDISYEYCKRSREVAKELLKAISESLGLEEDYIEKALET KSLQILIVNLYPPCPQPELAM  
GMPPHSDHGLLTL LAQNEIGGLQIKHKGWIAANALPNSFMVNI GDHMEILSNGKYKSILHRVAVNTKAT  
RVTVVTANGPSLDAVVTAPDLDVCENYPPLYRGMKYR DYVELQQSNQLDGKSC LDRILV

>PBRDIOX13

METPKLRDFGSFLPVPSVQELAKQVLTEIPPRYIRTDL EALNKLSCASNTDQTVPIIDMQCLLSAEP EME

LEKLHSACKEWGFFRVVNHGVDNLESVKSEIESFLNLPVNAKNKYGQKQGDQGFGRFVLSEEQKLDWG  
DFFYMVTRPLYLRKPHLFPELPLPRETIESYSSEVSKLAMALFEMMGKALKIETGVMTEIFEGGMQAMR  
MNYYPCCPRPDLVIGLNAHSDFGGLTILLQLNEVEGLEIRNKGWVSVKPLANAFVNVGDVMEILTNGI  
YHSVEHRATINSSKERLSVATFHYPKLETGIGPLPCMITPKTPALFGRIERYELLRKYARKLNGKSTL  
DCMRIGNGFEDDNTA

>PBRDIOX14

MSYESLPPKVVVPSVHELIEKITEIPNPYIRTSCVDHEDHHTDQSTADHNIPVIDVQGLLSGESVLADS  
EFEKLHSACQDWGFFQVVNHGISSLVIANLKSEMRNLFELPLEERKKICQEPGDPMAEGFGQLFIVSDDQ  
KRDWSDTFYLTALPTKLRKPQLFAGIPVLMRESLEAYSSGLKDVMTILLGKMAKAIKMSDEMEELFNDC  
LQRMGLNYYPPCPKSEQVIGLSPHSDAGALSIVLQLNETEGLQIRKDGKWTVKPIPGALIVNIGDMLEI  
LSNGAYPSIEHRVVVNPTMERFSIATFHSTNPDAEIGPAHSLIDPPHKPALFRRETLLKYYQNFFAHKLN  
GKTTNLDFMRIRNGDLSS

>PBRDIOX15

MSSSPMVVPLVRELVKENITEIPNRYIRPTSDLDHEYHHSDDDSTAAYNIPIVIDVEGGLLSGESVLADS  
ELHKLHSACQHWGFFQVVNHGISSLVIANLKSEMRNLFELPLEERKKICQEPGDPMAEGFGQLFIVSDDQ  
KRDWSDTFYLTALPTKLRKPQLFAGIPVLMRESLEAYSSGLKDVMTILLGKMAKAIKMSDEMEELFNDC  
LQRMGLNYYPPCPKSEQVIGLSPHSDAGALSIVLQLNETEGLQIRKDGKWTVKPIPGALIVNIGDMLEI  
LSNGAYPSIEHRVVVNPTMERFSIATFHSTNPDAEIGPAHSLIDPPHKPALFRRETLLKYYQNFFAHKLN  
GKTTNLDFMRIRNGDLSS

>PBRDIOX16

MSSSPMVVPLVRELVKENITEIPNRYIRTTCLDHEEDHSHRDDYDSAAKYDIPVIDVQGLLSGESVLA  
DSELEKLHSACQHWGFFQVVNHGISSLVIDKLEIHNLFELPLEEKKIWQEPGDMEGFGQQFVVSNEQ  
KLDWSDMFYITALPTKMRKPQLFSRIPLSREALEAYSWGKLNLMILLGKMATALKMSDEMEDLFSDC  
LQRMKMNYYPCCPKSQVIGLSPHSDAGALSIVLQLNETEGLQIRKHGKWVPKPIPGALVVNVGDMIEI  
LSNGAYTSIEHRVMVNPTIERLSIATFHSINPDAEFGPACSLIDPPHKPALFRRETVKYYKNFFANKLN  
GKTTNLDFMRIQNGDQSSRLISG

>PBRDIOX17

MSSFGSSLIVPSVQELVKKEITEIPDRYIRTSSSNLSLDNEIHYSDSAHEIPVINIGRLLSGEQTLADN  
ELDKLHSACKDWGFFQVVDHGVSLSTIEKIKLETHNLFELPLEEKKLWQTPGDHEGFGQLFVVSDEQKL  
DWDMMFFITMLPTILRKPPLFAGMPSPLREALEYALGLEKLTMTILEQMAKALKMSDNEMRELFSGCYQ  
TMRLNYYPPCPKAEQVVGISPHSDADALTIVLQLNETEGLQIRKDGKWIPIVPIHNAFVNVNIGDIMEIVS  
NGVYRSIEHRAVVNSTKERLSVAAFHSANLDAEIGPAHSLISPPHKPALFRRESVETYFKNFFARKLDGK  
SYLASMRIKDVHGEQSS

>PBRDIOX18

MEAPKLIMLGGSLFVPSVQELAKQSLAEVARYVRDDQDTLGNINIPMSMIDQSIPVIDLEKLLSPEP  
IVGELELERLHSACKEWGFFQVVNHGVDLSLLVEKVKSEIEGFFELPVDEKKKFWQEEGDIEGFGQIFVHS  
EDQKLDWADM FYMLTLPPNMRKPRLFPNLPLPLRQTIDSYSSELSKLVLTLDLMGKALQMESGVLTELF  
ENGIQRMNYYPPCPQPEQVIGLTPHSEVGGLTILLQLNEVDGLQIRKEKIWVPIKPLSNAFIVNIGDI  
LEIMSNGIYRSVEHRATVNSTKERLSVATFHSPRKDTEIGPILITPETPALFRTSGFEDYFRKFFAHKLN  
GKSFLSSIRIGETDEGNAT

>PBRDIOX19

MSMIDQSIPVIDLEKLLSPEPIVGELELERLHSACKEWGFFQVVNHGVDLSLLVEKVKSEIEGFFELPVDE  
KKKFWQEEGDIEGFGQIFVHSEDQKLDWADM FYMLTLPPNMRKPRLFPNLPLPLRQTIDSYSSELSKLVLT  
LVDLMGKALQMESGVLTELFENGIQRMNYYPPCPQPEQVIGLTPHSDVGGLTILLQLNEVDGLQIRK  
EKIWPVIKPLSNAFIVNIGDILEIMSNGIYHSVEHRATINSTKERLSVAMFNPKVDTEIGPIHSMITPE  
TPALFRTIGYDEYLKIFFSRKLDGKSLLESMKI

>PBRDIOX20

MMSAQDSWPEPITRVQAISESGSSVIPDRYVKPPSERPNTSTTSSTELLGLSIDTETSSNVDASDLNIPL  
IDFQGLLDDDEDNHLVLPDTILDQVCMASKNWGFFQIVNHGVSPELMDQVRDVWRQFFHLPFEQKQVYAN  
TPATYEGYGSRLGVEKGAILDWNDFYLYLHYPQLQDPNKWPALPLSCREVIAEYCKQLVKLSKKIMKIL

SITLGLEEDYLQNAFEGGEEFGACMRVNFYPKCPQDLALGLSSHSDPGGMTLLL PDDDVVGLQVRKDDT  
WITVKSAPNSFIVNIGDQIQVLTNAIYKSVEHRVTVNSMNERLSLAFFYNPRGDLIIQPAKELVTLERPA  
LYSPMTFNEYRRFIRTMGTRGKLQLESMKSPR

>PBRDIOX21

METPKLVKSSGSSLFLSTSVQELAKQSLPEVPARYIRTNLEPLSNVSGDSQSVVIDLQKLLSSEPIIGE  
LELDKLSACKEWGFFQVVNHGVDNLVMEKIKTEIQGFFNLSLDEKQKFWKKEGDAEGFGQNFIESEDQK  
LDWGDTFGMFTLPIHMRNPRLFPELPLPLRETIESYSLDVRKLALALIGLMEKALKIKTSAMSEL FEDGG  
QAMRMNYYPPCPQPEHVIGLTPHSDAGGLTILLQLNEVDGLQIKKDKIWVPIKPLPNAFVVNIGDILEIM  
TNGIYRSVEHRATINSSKERLSVAAFHSPKGDTLIGPMVSLITPETPALFRTIGYQDYMKKFMRSRKL D GK  
SLVNSMRIGEGDEDK

>PSODIOX3

METPILIKLGNLSIPSVQELAKLTLAEIPSRYTCTGESPLNNIGASVTDDETVPVIDLQNLLSPEPVVG  
KLELDKLSACKEWGFFQLVNHGVDALLMDNIKSEIKGFFNLPMEKTKYGGQDGDGFEFGQPYIESEDQ  
RLDWTEVFSMLSLPLHLRKPFLPELPLPFRETLESYLSKMKLSTVVFEMLEKSLQVEIKGMTDLFED  
GLQTMRMNYYPPCPRPELVGLTSHSDFSGLTILLQLNEVEGLQIRKEERWISIKPLPDAFIVNVGDILE  
IMTNGIYRSVEHRVVNSTKERLSIATFHDSKLESEIGPISSLVTPETPALFKRGRYEDILKENLSRKL D  
GKSFLDYMRM

>PSODIOX2

METAKLMKLGNGMSIPSVQELAKLTLAEIPSRYICTVENLQLPVGASVIDDHETVPVIDIENLISSEPV  
EKLELDRLHSACKEWGFFQVVNHGVDTSLVDNVKSIDIQGFFNLSMNEKIKYQKDG DVEGFGQAFVASED  
QTLDWADIFMILTLP LHLRKPFLFSKLPPLRETIESYSSEMKKLSMVLFEKMEKALQVQAVEIKEISEV  
FKDMTQVMRMNYYPPCPQPELAIGLTPHSDFGGLTILLQLNEVEGLQIKNEGRWISVKPLPNAFVVNVGD  
VLEIMTNGMYRSVDHRVVNSTKERLSIATFHDPNLESEIGPISSLITPNTPALFRSGSTYGELVEEFHS  
RKLDGKSFLDSMRM

>PSODIOX1

MEKAKLMKLGNGMEIPSVQELAKLTLAEIPSRYVCANENLLLPMGASVINDHETIPVIDIENLISPEPII  
GKLELDRLHFACKEWGFFQVVNHGVDAASLVDSVKSEIQGFFNLSMDEKTKYEQEDGDVEGFGQAFVASED  
QTLDWADIFMMFTLPLHLRKPFLFSKLPVPLRETIESYSSEMKKLSMVLFNKMEKALQVQAAEIKGMSEV  
FIDGTQAMRMNYYPPCPQPNLAIGLTPHSDFGGLTILLQINEVEGLQIKREGTWISVKPLPNAFVVNVGD  
ILEIMTNGIYHSDHRVVNSTNERLSIATFHDPNLESEIGPISSLITPETPALFKSGSTYGDLVEECKT  
RKLDGKSFLDSMRI

>SCADIOX1

MEKTQPILGTSLIVPSVQELAKQPLVEVPPRYLRPDQDPPIISQSDSLVPITTVPVIDLQCLLSPEPIG  
DSELEKFHSACKEWGFFQLINHG VNSSLVEKVKSEIQDFFRLPIEEKNKYWQEEGEVEGFGQAFVSTEQ  
KLDWGDMMFFMATLPLHLRKPFLFPKLPPLRDTLESYSSELKCLTMALLVLMARALQIETKVTELFE D G  
MQSMRMNYYPPCPQPEHVIGLTPHSDSSGLTILLQLNEMEGLQIRKEGRWVPVKPLPNAFIVNIGDILEI  
VTNGIYPSVEHRATVNSMKERLSVATFHSPNLTKETGPAPSLITPYRPALFRRVGNEEFWRERFRRELNG  
KSFLDFMKIGGGDGNTA

>SCADIOX2

MNSSSDSSVPKQQQEEVVKFGRTL LVPVSVQELAKEQNT EIPHRYIRSGLDDEDCPANIVCDPTSSSFP  
TVPVIDIQTL LSGDISADSELETLHSACKDWGFFQVVNHGVSSSLIEKIKLEIHDLFELPFEKRKLWQQ  
PDDLEGFGQMFVVSEEQKLDWSDMFFIFTRPTTIRKSDLYTKLPLSLRETLEAYSLELKE LAITILGRMA  
EALKMDSTEMRGLFNNGFQTMRLNYYPPCSQADKVLGFTPHSDADALTILLQLNETEGLQIRKDGKWI PV  
KPIPNAFVVNVGDIMEIVSNGVYRSIEHRVVNSTKERLSIATFFSTNLDAELGPAHSLIDPPHKPALFK  
RVTVVKYEDFFSQKLDKKS YIDFMRIENGQDNHSN

>SDIDIOX1

MEALPKPPVLGNMIVPSVQELASKSLVKVPPQYIQMLDHQDPPFIINEVLTVTSALPIIDLQTL LSHPE  
TNNNNFDSSELVKLHSACKKWGFFQLVNHGVNTSLLDKVKSEIESFFKLPMEKKKYWQDEENFEFGQAF  
VFSEEQKLDWADM FYMITLPRQARKHHLFPKLP GALRDALESYTSSELQNIAMKLVEFIGRALEIETKVMN  
EFFKDGLQTMRMNYYPPCPQPELVMGLASHSDAIGISILFQLNEIEGLQIKNEGIWIPVKPLPNTFVVNL

GDILEVTAYSNKWALS

>SDIDIOX2

MEALPKPPVLGNMIVPSVQELASKSLVKVPPQYIQMLDHQDPPFIINEVLTVTSALPIIDLQTLSSHPE  
TNNNNFDSELVKLHSACKKWGFFQLVNHGVNTSLLDKVKSEIESFFKLPMEKKKYWQDEENFEGFGQAF  
VFSEEQKLDWADM FYMITLPRQARKHHLFPKLP GALRDALESYTSELQNIAMKLV EFIGRALEIETKVMN  
EFFKDGLQ TMRMNYPPCPQPELVMGLASHSDAIGISILFQLNEIEGLQIKNEGIWIPVKPLPNTFVVNL  
GDILEILTNGLYRSVEHRVTVNSMKERLSVATFYSPKLEEVIGPLPCLINPHNPALFKTVGVEEYFKKRY  
SLKLNGLTIDFMRIEGDTA

>TCODIOX1

MDKAEGRAPVTLGKSLLVPSVQELARKPLATVPQRYVREDHQDDPSLLKHTCAPTSPLPSLPVIDLKCLL  
DSQSAGSELEKLHFACKDWGFFQLVNHGVSTWLVEKVKSTQDFFNLSIEEKQKFWQQPGEIEGFGQAFV  
VSEEQKLDWADMFFMTTLPKYL RKPFLPMLPLHFRETMEEYSLELKNLAMTILEMMAKALKIETEELKL  
LFDDGLQAMRMNYPPCPQPEQVIGLTPHSDAVGLTILLQVNEMEGLQIRKDGMMVVPVNL PNAFVVNIG  
DILEVTTTYIYLYIYNI III

>TCODIOX2

MTSKAGEHGSLPVPNVQELASNDLKGVP SRYIRPELETHQVLSDESLEIPVINLQKLLNQQQMGTSADG  
DDDNEMCRLHKACRDW GFFQLINHGVPEEII EKMKSDTVEFFKLPLEEKKAYA QEPGNI FGYGQTFVVS  
DQKLDWSDILVLLTLPVSDRIMKFWPTKPSSFRGTLDKYAKEMEKL TICLLDLIEKNL GIESGKLRNVYK  
GGLQRVRMNYPPCPVADKVLGLSPHSDASLITLLTQVNEVEGLQIKKNGHWVSIKAIPGAFIVNLGDLL  
EILSNGMYKSIEHRGVIHPEKERLSIAGFQGA KSGVVIGPFPELLGENGANYRAIEHDAYLKQFFSSKLD  
GKRVLDLMLK

>TCODIOX3

MKSLSLPVPNVQELASKSVKDEVPDRYIRRELESEHVSDESSDEIPVIDLQKLFSSDDEMTKLHIACKDW  
GFFQLINHGV EELIKKMVKNVEEFFHLPLEEKKAYAQQPGDSQGYGQAFVLSDDQKLDWSDMLSLTTLPI  
SERNLRVWPKNPPSFSETLEKYVTEMQQLTFKLLSLIAKNLGV EEEKVTSVFDEGLQGVRSNYYPPCPRA  
DKVIGISPHSDASIIITLLIQNNEVPGLQIRKCGNWVPVKPIQGA FVVNVGDVLEILSNGLYRSIEHRAII  
HPEKERISIAGFQDPNLGTVIGPIADLLDDKNFANYKTIRFDDYWGHYFSAKLDGKSVLNLMLKENNHA

>TCODIOX4

MTSKAGEHGSLPVPNVQELASNDLKGVP SRYIRPELETHQVLSDESLEIPVINLQKLLNQQQMGTSADG  
DDDNEMCRLHKACRDW GFFQLINHGVPEEIIKMKDDTVEFFKLPLEEKQAF AQEPESFHGYGQAFVVS  
EQKLDWSDMLVILTLPVSDRVMKFWPTNPPFRGII EKYA EEMEKL TICLLGLIETNLGIEGGKLINTYKD  
GGLQWMRMNFYPPCP EADKVIGISPHSDASLITLLIQVNEVEGLQINKSGKWVPIKAIPGAFIVNFGDAI  
EVL SNGMYKSIEHRAVIHPEKERLSIAGFQDPKRGIVVGPPELL EDGAKYKTVEYDEYLTQYFSRKL DG  
KSALDLIKLSEM

>TCODIOX5

MEGKVTGKIGEYRSLPVPNVQEF AKNNLKEIP SRYIRPELETHQVSNIDESLEVPVINLLKLLDQQLLGT  
NDDDDDEMGRFHKACRDW GFFQLINHGVPEEII EKMKSDTVEFFKLPLEEKKAYA QEPGNI FGYGQTFVVS  
EDQKLDWSDILVLLTLPVSDRIMKFWPTKPSSFRGTLDKYAKEMEKL TICLLDLIEKNL GIESGKLRNVY  
KGGQRVRMNYPPCPVADKVLGLSPHSDASLITLLTQVNEVEGLQIKKNGHWVSIKAIPGAFIVNLGDL  
LEILSNGMYKSIEHRGVIHPEKERLSIAGFQGA KSGVVIGPFPELLGENGANYRAIEHDAYLKQFFSSKL  
DGKRVLDLMLK

>TFLDIOX1

MEGSKQVSFASKLVPNVQELAKQPIDSIPPRYVRTDLDNPTIVSVPASTPTIPVIDMEKLLDGDNDMSE  
TDKLHTACKDWGFFQLVNHGVDTTLVEKAKHEIQEFFGLPIEEKRKFQKENEVEGFGQVHVVSDEQKLD  
WGMDFMYALPINARKPHLFPKLP LPPFRDIIDAYSQEMKLLAMKILGMIEKVLKMDAKEITQLFEDGRQS  
MRMNYPPCPQPEKVI GLTPHSDAGGLTILLQINEIEGLQVRKNGIWIPIKPLPNAFIVNIGDILEIGTN  
GIYRSVEHRATVNSTKERLSIATFHNP SLQDEICPLPNLITSDRPAMFRSIMTEEYNTKLLTRALDGKSL  
LDLRIEAKCEDDGN

>TFLDIOX2

MEGSKQVSFASKLVPNVQELAKQPIDSIPPRYVRTDLDNPTIVSVPASTPTIPVIDMEKLLDGDNDMSE

TDKLHTACKDWGFFQLVNHGVDTTLVEKAKHEIQEFFGLPIEEKRKFQKENEVEGFGQVHVVSDEQKLD  
WGMDFMYALPINARKPHLFPKLPFRDIIDAYSQEMKLLAMKILGMIEKVLKMDAKEITQLFEDGRQS  
MRMNYYPPCPQPEKVIGLTPHSDAGGLTILLQINEIEGLQVRKNGIWIPIKPLPNAFIVNIGDILEIVTN  
GICRSIEHRATVNLKERISVATFYSPKFDREMGAHSLVTEKNPALFRRIVVEDYMKGFFARKLVGKSN  
LDVMRIDN

>TFLDIOX3

MSTTVMQAEWPEPIVRVQSLAESGLSVIPERYVKPPSQRPKLDLVVDHEINIPIIDLSGLEGDDQLRKT  
ILNQISVACRDWGGFFQVNVHGVPKLMHEAREAWRDFHLPVEEKQIYANSPKTYEGYGSRLGVEKDAIL  
DWCDYFFLHYRPQLLDHNNKWPAPFVSLRNLIEEYNSELVKLSGRLMKILSVNLGLDEEYLQNAFGGENI  
GVMCRVNFYPKCPQPDALGLSSHSDPGGMTLLLPDHSVSGLQVRKGDKWVTIQPAPDAFIINIGDQIQV  
LSNAIYKSIEHRAIVNSVKERISIAFFYNPKSDLLLEPASELVTQDQPALYLPMTFDQYRLEIRTRGPRG  
KAYMESLKSPR

>XSIDIOX1

MTKNLNNLGGSLPIDNVQSLAGTELKDVPERYVRPELEYDNDVVSTDKEDVEIPVIDLSRLLNQKFASDE  
LAKFHSACLWGGFFQLINHGVSSEVIEKMKVDMEDFFRLPLEEKNVYGQLPNSTEGYGQSFVKSDEQKLE  
WADMHLLITKPVQERNMRFWPNTPTSFRATVDKFSTDVQKVAMCLIGMMAKNLGLSQVLTKPFENCIOC  
VRMNYYPPCPNFDKVLGLTPHSDASSLTLQLQVNVQVGLQIKKHGKWFPIKPILGAFVNVNIGDILEIMTN  
GIYKSIEHRVVINPDKERLSIAIFHDPEFAAIIGPVQDLVRKYGARYKSISHADYLNQSINNKLDSKTF  
LKFKLINNRE

>XSIDIOX2

MEAREVVSFGSSLIVPSVQELAKEQIDLISPRYIRSDQQDHPIFLDPSLLSTVPVIDMKILLAHDSAESI  
HSELEKLHYACKHWGGFFQVNVHGIDSILIEKMKSEIQDFFKLPYDEKKLWQPGNHEGFGQLFVVSEEQ  
QLDWSDMFYITTL PNSLKQPSLFAKIPLPLRETLEAYSLELKTARTILGKMAEALEMDTEEMKELFSDG  
VQSIRFNYYPLCAQPEQVLGFTPHSDADALTILLEVNETEGLQIRKDGKWI PVKQVPNALVNVGDIMEI  
VSNGVYRSIEHRAIVNSVKERLSVATFYSTNVDAEIRPAPSLITAKNPASFRTVPVEKYFKELYARKLDG  
KSYLDFMRIENC

FADOX

>CSATHCAS

MNCSAFSFWFVCKIIFFFLSFHIQISIANPRENFKCFSKHIPNNVANPKLVYTQHDQLYMSILNSTIQN  
LRFISDTPPKPLVIVTPSNNSHIQATILCSKKVGLQIRTRSGGHDAEGMSYISQVPFVVVDLRNMHSIKI  
DVHSQTAWVEAGATLGEVYYWINEKNENLSFPGGYCPTVGVGGHFGSGGGYGALMRNYGLAADNIIIDALV  
NVDGKVLDRKSMGEDLFWAIRGGGGENFGIIAAWKIKLVAVPSKSTIFS VKKNMEIHGLVKLFNKWQNI  
YKYDKDLVLMTHFITKNITDNHGKNTTVHGYFSSIFHGGVDSLVDLMNKSFPGLGKKTDCKEFSWIDT  
TIFYSGVVNFNTANFKKEILLDRSAGKKTAFS IKLDYVKKPIPETAMVKILEKLYEEDVGAGMYVLYPYG  
GIMEEISESAIPPHRAGIMYELWYASWEKQEDNEKHINWVRSVYNFTTPYVSQNPRLAYLNRYRDLDLG  
KTNHASPNNYTQARIWGEKYFGKNFNRLVKVKT KVDPNNFFRNEQSIPPLPHHH

>PSOFADX5

MMMSSSNILPLVTLVLFVFFSSGSAANNSLNGDFLQCIKKNEYSSIPPIPIFTPDNSSFTTIFRSSARNL  
RFLTPNSTQTPQFIITPTHESHVQSAVVC SQKHGFDLKVRSGGH DVEGLSYVSDTPYVLVDL INFRNIIV  
DLKEKTAWIQAGASLGEVYYQAANKSNNTLGF PAFGFCPTVGVAGHISGGGFGALVRKYGLASDQVIDARI  
VTVDGKIYTKETMGKDLWAIIRGGGANFVLLSWKVKLVVTPVVTVATISRTLEQGATDLVHKWQFVA  
DRLHEDVYIGLTF SVANSSRAGGKT VSVQFAFLFLGGSDRLELMEESFPELGLKRNETTEMKWVESHVY  
FYARGRPIELLWDRDHATKSFLKIKADYVREPISKSGLEAIWRRFVGGDSPAMLWTFPFGGRMNEISEFET  
PYPHRAGNIYNYIMYVGNMMNETESEKQIDWMRRFYNSMARYVSKNPRSAYINYKDLDLGVNRNNVSEAVG  
YVQARSWGRKYFKSNFERLVKVKSMVDPGNFFKNKQSI PPVSTWGKQ

>CJASTOX

MMGISSLVFPFLVFI AIANSLVPLASSSSEYEGFLQCLDLRSNSSIPIYNPSSTSYTSILHASIYNLRF  
ISPTTPKPNFIITPMRESHVQATVVC SREHGLLIRTRSGGHDFEGSSFVATVPFVLLDLIHLRTISVNI

DETAWVQTGATIGELYYRIA EKSRTHAFPAGLCPSVGVGGHISGAGYGILMRKYGLSADHVIDARLV DVN  
GRILDKESMGEDYFWAIRGGGGASFGVILAWKIRLVPVPPTVTTFFVPRVLEQGATALVHKWQIIADKLD  
DDLFLGLSVQALHLDPDHPEKKTIVISFLGFYLGAPKTLQLMEE SFPELGLMKEDCIEMSWIKSALYFG  
IFQLETDLSLLLERNPIPPKNRYMSKSDYVHEPVSEAVLEGIWKRFNEVDEPEIIMSPYGGKMNEIEES  
AIAFPHRKG NMYKINYL VSWKELGEEAEK HASWIRELYNYMTPYVSKNPRCSYLNFKDNDLGHKKNGTA  
TYLEAKVWGSKYKNNFDRLVSVKTKVDPDDFFTNEQSIPPLRSLAEAKK

>BWISTOX

MSKMASSIFATFSLSSLLPTSLASSDANYEDFLQCLDLYSQNSIPVYTRNTSSYTSILESTIKNLVFLS  
PTTPKPNFIVTPMQESHVQTSVICCRMHGLQMRIRSGGHDFEGLSYVSNVPFVVDLIHLKTINVDIEEN  
SAWVQTGATIGELYYRIA EKVG VHAFFAGLCPTVGVGGHISGAGYGLMRKYGVSADHVIDARIVNVDGE  
ILDRESMGEDLFWAIRGGGGASFGVILAWKIRLVPVPPTVTIFIVPKTLEEGATALLHKWQFIGDNVHED  
LFIGLSMRSV IISPKGDKTILV SFIGLFLGGSDKLVQHMEQSFPELGVKPHDCIEMSWIKSTVVFVGF SN  
DASLSVLLDRKNPFPKSYHKVSDYVTEPLPISVLEGICHRFLKNGVNKAEIIMSPYGGRMNEISESEI  
AFPHRKG NLYKINYIAEWEEAGSMENHLSWIRELYRYMTPYVSKSPRSSYLNFKDIDL GQTKNGTATYSQ  
AKAWGSKYFKNNFKRLMQVKTVPNNFFCNEQGIPPFSS

>AMEFADX1

MKKMIPNSSSSSILSVLVLLL FSTSSWAANSIHEDFLNCLSIYKSSFPIPIYTSKNSSFNTLFRSSARNL  
RFLSPNSTQKPEFIITPTLESHVQTTVVCSKKHGLDLKVRSGGH DVEGLSYVSDSPYVMIDLVD FRNITV  
NVKNATAWIQAGSSLGEVYYKVGNESKNTLGFPA GFCPTVGVGGHISGGGFGSLVRKYGLASDQVIDARI  
VTVNGEILNKKTMGKDL YWAIRGGGANFVLLSWKVKLVPTPIVTVATIDRTLEQGATNLVHKWQFVA  
DRLHEDVYIGLTMVTANTS RAGEKT VVAQFSFLFLGNTDRLLQIMEESFPELGLKRNDDTEMSWVESHVY  
FYRRGQPIEFLWDRDHLTKSFLKVKSDYVREPI SKLGLGIWKRYVGGDSPAMLWTPFGGRMNQISEFES  
PYPHRAGNIYNYIMYVGNWLNENESEKQLNW MRSFYSYMGRYVSKNPR SAYLNYKDLDLGVNDNNVSEYIR  
YLKARSWGRKYFKNNFEKLVKVKSMVDPDNFFKNRQSIPIRSWGKELEAINIVI

>CMAFADX1

MMRISSSVTL SFLSFFVLL FSTSSLAATSNSDHGDFLQCLALHKPSTPIPIYTPS NSNFTTLFRSSARNL  
RFLSPNSTQPQFIITPT HESHVQA AVVCCRKHGLDLKVRSGGH DVEGLSYWSDAPFVIVDLVNF RNITVD  
VKAKTAWVQAGASLGEVYYKAANASNTLGFPA GFCPTVGVGGHISGGGIGALVRKYGLASDQVIDARIVT  
VDGKILDKKTMGKDLFWAIRGGGASNFGVILSWKVKLV DVTPIVTVGTVSRTLEQGATDLVYRWQFIADR  
LHEDLYLASTMTVANGSRAGGKT VLVNFFFVFLGTD RLLRLMEESFPELGLNRSDCNEMSWVESHVFLY  
APGRPVEYLWDRDHETKSFLKIKTDYVREPI SKAALEGIWIRFMGGQSPAMLWTPMGARMNEISESEL PY  
PHRAGNIYNYIMYVGNWQOESESEVMLDWMRRFYRHMGRYVSKNPRSGYLNYKDLDL GQSESGDSEAMSYI  
RARSWGRKYFKGNFERLVKVKSMVDPGNFFKNKQSIPIKSWGKN

>CCHFADX1

MGISRIRVVVVSSLLSILVLSNISLATSAA SVNENFLECLSLQKTPPIPIPTYSPNNFSYSTIFNSSARN  
LRFLSPTSEKPRFVITPLHESHVQA AVVCCCKKHLEL KVRSGGH DLEGLSYTSETPFVIADLVNYRNISI  
NVEDKSAWIQAGAQLGEVYYRIA EKSKTLGFPA GFCPTVGVGGHISGGGFGGLVRKYGLASDQVIDARMV  
DANGNILDKESMGEDLFWAIRGGGASNFGVILSWKVKLV DVTPIVTVVAIVDKTLEQGATSLVYKWKQIAD  
KLHEDLYISPTMSTVNASRGGQRTVLVQFSILFLGGIDRLLQLTQQSFPELGLQRKDCTEMSWVESHVYF  
YARGRPLELLLD RDHVTKSFLKVKTDYVKEPI SITGLEGIWRKFLEGDAPVMLWTPFGARMNEISESESP  
YPHRAGNMFNIMYIANWQDDRESQKHIDWIRRFYSYMGSYVSKFPRAAYLNYKDLDL GEHRYGPLINSLT  
ARNWGNKYFKSNFERLVYVKSVDPSNFFKNKQSIPTF

>ECAFADX1

MKMGISSSPSSSSTLSLLSLLL VFFISLTSSWATHSNLHGDFIQCVLSQHLYSSIKVPIYTPQSSNFTS  
LFRSSARNLRFLSPNLT KPQFIITPT HESHIQAAIICCKKHGLDLKVRSGGH DVEGLSYVSDTPFVIVDL  
VD FRNITVDVKSKTAWVQAGASLGEVYYAVANKSKTLGFPA GFCPTVGVGGHISGGGFGALVRKYGLASD  
QVIDARFINAEGKILDKRTMGDDLFWAIRGGGAANFGIIVSWKVKLV DVTPIVTVATVNRPLEQGATNLV  
HRWQFIADRLHEDVYIGLTLIVANGSRAGGKT VIAQFSFMFLGRTDRLLSLMEESFPEL DLKRTDCNEMS  
WVQSHVYFYAPNRTIEFLWDRDHVTKSYLKIKADYVREPI SKAGLEGIWKIFMTG DSPAMLWTPMGARMN  
EISEFETPYPHRAGNIYNYIMYVGN SAQATESENQVNW MRFRYQYMTYVSKNPR SAYLNYKDLELGQNRK



NDSEAMAYIRARNWGRKYFKGNFERLVKVKSMVDPNSNFFKNKQSIPLHWSGKH

>GFLFADX1

MGISSFATLSFSLVLFVLSIGSSAANSNSVHGDFLQCLSSLNQTSTPITIYTPSNSNFTELEFRSSARNLR  
FLSPNSTQPQFIITPTHEYHVQAAVLCRKHGLDLKVRSGGHDVEGLSYWSDVPFIIIVDLVNYRNITVDV  
KAKTAWVQAGASLGEVYYQVANASKTLGFPAGFCPTVGVGGHISGGGFGALVRKYGLASDQVIDARIVTV  
DGRILDKRNMGKDLFWAIRGGGASNFGVILSWKVKLVEVTPIVTVATVGRGLEQATDLVHKWQFIADRL  
HEDIYIGLTMTVANGSRAGEKTVLAQFSFMFLGGTDRLRLMHESFPELGLNRSDCSEMSWVESHVYFYA  
PGRPVEYLWDRDHVTKSFLKIKADYVREPIKSGLEGIWRRFMGGQSPAMLWTPMGARMNEISEFELPYP  
HRAGNIYNIMYVGNWVEENESEKQIDWMRRFYNYMGRYVSKNPRSAYLNYKDLDLGQENSDSEAMRYIK  
ARTWGRKYFKGNFERLVKVKSMVDPGNFFKNKQSIPIKSWGIEAGD

>SACFADX1

MGISSSATLSFISFLVLLFSSTASLAANSTSVHGDFLQCLSIHNSVPIPIYTPNNSNFTTLFRSSARNLR  
RFLSPNSTQPQFIITPTRESHVQAAVCCRTHGLDLKVRSGGHDVEGQSYWSDVPFVIVDLVDYKNITVD  
VESKTAWVQAGASLQVYYEVANKSKTLGFPAGFCPTVGVGGHISGGGFGALVRKYGLASDQVIDARIVT  
VDGKILDKETMGKDLFWAIRGGGASSFGVILSWKVKLVDTPIVTVATVGRGLEQATDLVHRWQFIADR  
LHEDVYIGLTMTVANGSRAGEKTVLAQFSFMFLGGTDRLRLMGESFPELGLNRSDCKEMSWVESHYFY  
APGRPIELLWDRDHLTKSFLKIKADYVREPIKDGLEIWIWIRFMGGQSPAMLWTPMGARMNEISESELPY  
PHRAGNIYNIMYVGNWLQESESEQQIDWMRRFYNSMGRYVSKNPRSAYLNYKDLDLGQENGESEAMRYI  
KARTWGRKYFKSNFERLVKVKSMVDPDNFFKNKQSIPIKSWGKN

>SDIFADX1

MGISSSATLSFVSVFLVLIFFSTSSLAANSSVHDDFLQCLSLHQPSTPTPIYTPSNSNFTTLFRSSARNLR  
LSPNSTQPQFIITPTTHESHVQAAVCCRKHGLDLKVRSGGHDVEGLSYWSDAPFVIVDLVNYRNITVDVK  
AKTAWVQAGASLGEVYYKVANASNTLGFAGFCPTVGVGGHISGGGIGALVRKYGLSSDQVIDARIVTV  
GKILDKKTMGKDLFWAIRGGGASNFGVILSWKVKVVDVTPIVTVGTVSRGLEQATDLVYRWQFIADRLH  
EDLYLASTITVTNGSRAGGKTVLVNFFFMFLGDTDRLLRLMEESFPELGLNRSDCNEMSWVESHVYFYAP  
GRPVEFLWDKDHETKSFLKIKTDYVREPIKAALEGIWERFMGGQSPAMLWTPMGARMNEISESELPYPH  
RAGNIYNIMYVGNWQEESESEQQIDWMRRFYRHMGRYVSKNPRSGYLNYKDLDLGQSESGDSEAMSYIRA  
RSWGKKYFKGNFERLVKVKSMVDPNSNFFKNKQSIPIKSWGKN

>TFLFADX1

MKISKFQLLSIIMFMTTCSISLLDLASSPNYESFLQCFTYSNFSIPIHSPTSSSYTSILHASIYNLKF  
KSPTIPKPKFIITPMHESHVQVTVVCCRQHGLQIRTRSGGHDVEGLSYVSDVPFVLLDLIHLRKISVNIE  
DNTAWVQTGATLGELYYRIAIEKSRTHAFPAGLCPSVGVGGHISGAGYGILMRKYGLSADHVVDARLV  
GRILDKESMGEDLFWAIRGGGASSFGVILSWKIKLVVPVQTVTFFIVPRTLEQGSALVHKWQFIGDKLT  
EDLFLGLSIQAMHLDDGHDNGKKTILISFLGHYLGPMKLLQLMEENFPQMQLKKEDCIEMSWIKSAVYFG  
VFTLESNLNILLERKNPFPKGRYLTKSDYVQEPMSNALEGIWKRFEIDEPEIIMSPYGGRMNEIEES  
AIAFPHRKGMYKINYIALWKEEGDEAERKHASWIRELYSYMTPYVSKSPRCAYLNFKDIDLGHKRN  
GTATYLEAKVWGNKYFKNNFDKLVNVKTRIDPDDFFTNDQGIPLPSLAEDK

>HCAFADX1

METSSFLMISFLVFTTFCVPSASIHENFLQCLDLHSNSSIPIYTPNPSYLSILHASIYNLKFSPSTP  
KPNFIITPMQESHVQAAVCCCKYNLQLRTRSGGHDVEGLSYVSYVPFVLLDLIHLRSINVNIEDNSAW  
QTGATLGELYYRIAIEKSRTHAFPAGLCPTVGVGGHISGAGYGALLRKYGLSADHVIDARLVN  
GRILDKESMEEDLFWAIRGGGASFGVILAWKLRLLPVPPTVTIFILPKTLEQATSLVHKWQFVADNLHEDLFLG  
LSIQTMNIDDDRRKGEKTIIVSFFCLYLGGVENLVQMMKQSFPELGLKDDCLEMSWIRSAVYFGVYSNE  
RSLSVLLERKNPVPPKMHYMVKSDYVKEPFSENVLEGIWKFYEVDMPEIIMSPYGGKMSEISETAIAFP  
HRKGNLYKINYLVSWNEEGDEVSEKNANWIRELYKYMTYVSKNPRASAYLNFKDIELGHKNGSATYLEA  
KVWGSKYFMKNFDRLVSVKTKVDPDDFFTNEQGIPLSS

>XSIFADX1

MGISSFVFLFPFLVFIALASSSSSQDEGFLQCLDLHSNSSIPVYNPSSSSYTSILHASIYNLKFISPATP  
KPYFIITPMRESHVQATVCCREHGLQIRTRSGGHDVEGLSFAHVVPFVLLDLIHLRTISVDIETA  
WVQTGATLGELYYRIAIEKSRTHAFPAGLCPSVGVGGHISGAGYGIILLRKHGLSADHVIDARLVN  
GRILDK

ESMGEDYFWAIRGGGGASFGVILAWKIRLVPVPPTVTTFIVPRVLEQGATALVHKWQFIADKLDDDLFLG  
LSVQAMHLDPDHPEKKTVVISFLGFYLGAAEKVLQLIDESFPELGLMKADCIEMSWIRSAVYFGIFQLEN  
NLSLLLERRNPIPPKNRYMTKSDYVQEPVSEDVLEGIWKRFYEVDEPEIIMSPYGGKMNEIEESAIAFPH  
RKGNYKINYLVSWEKELGEEAEKKHASWIRELYNYMTPYVSKSPRCSYLNFKDIDLGHKNGTATYLEAK  
VWGSKYFKNNFDRLVSVKTKVDPDDFFTNEQSIPLPLSLAEPKK

>NSAFADX1

ATSSMVAVLALLLTFSLATSASVHESFLQCLGSEPSTPLYTPNTSSYTSVLQFSVRNFRFSTSSTPKPDL  
IVTPLDESQVQAVVCSRKHGLMMKIRSGGHDFEGLSYVSDVPFIILDLINLDSISVDANKGTAWVQSGA  
SIGQLYYRIAIEKSRTYGFPAGVCTTMGVGGHFSGGGYGSLMRKYGVAADHIIDARIVNVDGKILDRRTMG  
KELFWAIRGGGGSSFGVLSWKIRLVPVPPTLTVFRLFKTLEQGATLLERWQYVAHKLPREIFFQVLVR  
TENSTDGKNTRRIQASFSQSVFLGKAELVPIMEQHFPELGLKQDDCIEMSWIQSTLWLLGLPADGSLEVL  
LNRSSLTFDFTKAKTDYVTEPISVAGIEGVWKFVLEQNRPLLLL TAYGGRMSKIPESSIPFPHRKGNYK  
LAQVYWEGEGTEEINWIRRLNRYLTPYVSKSPRATYVNYNDLDLGQSKNGTSSYSAARAWGNKYFKNNF  
DRLVKVTKVDPDNFFRNAQSIPTSVK

>MAQFADX1

PKPNFIVTPMQESHVQTSVICCRKHGLQMRIRSGGHDFEGLSYVSNVPFVLDLIHFRTIRVDIEDNSAW  
VQTGATIGELYRIAIEKSRVHAFAPAGLCPTVGVGGHISGAGYGVLRKYGVSADHVIDARIVNADGEILD  
RESMGEXLFWAIRGGGGASFGVILAWKIRLVPVPPTVSIFIVSKTLEEGANALLHKWQFIGDNVHEDLYI  
GISMRREIISPKGDKTILVSFIGHFLGGSEKLVQHMEQSFPELGVKPNDCVEMSWIKSAVVFVGFVSNDA  
LNVLLDRKNPFPKSYHKVKS DYVAEPLVTVLEGILKRFLKNGIDKPEIILSPYGGRMNEISESEIAFP  
HRKGNLYKINYIAEWEEAGSMEKHLWIRELYEYMTYVSKSPRSSYLNFKDIDLGMKNGTATYSQAKA  
WGSKYFKNNFKRLVQVTKVDPNFFNEQGIPIPFHHRAN

>NDOFADX1

MGSSNFATLSFLCIFLLLVSTSSCADEENFLQCLDFHSQNSIPVYTPNTSSYRSILESPIYNLRFSSSTF  
RKPLFIVTPMQESHVQTTVTCKKHGLQLRVRSGGHDFEGLSSISTVFPVILDLVHHRINVDIEDNSAW  
VQAGATIGELYRIAIEKSKVHAFAPAGLCPTVGVGGHISGAGYGVLRKFGVSADYVLDARIVNADGEILD  
RKSMGEDLFWALRGGGGASFGVILAWKIQLVHPPTVTIFIIIPKTLEQGATSILHKWQFIADNVDEDLFI  
GISIRPEDKVDPKGKTILVSFIGLFLGGPEELLQHMDHSFPELGLKRHDCIEMSWIKSAVVFVGFSTEV  
PLNALLDKKNPFPKSFHRVKS DYVKEPLSVTVLEEIWRRFLEMVHKPEIIMSPYGGRMNEISESAIAF  
PHRKGNIYKINYIEWFDEETNTAKKHTSWIRDLYKYMTYVSKSPRASYNFKDIDLGHKNGTATYSYSE  
AYKAWGSKYFKNNFKRLTQIKAKVDPNFFWNEQGIPLSS

>BTHFADX1

MFVVVASSIFTTFLSLLSLLPTSLASSDANYEDFLQCLDLYSQNSIPVYTRNTSSYTSILESTIKNLVFL  
SPTTPKPNFIVTPMQESHVQTSVICCRKHGLQMRIRSGGHDFEGLSYVSNVPFVLDLIHLKTINVDIEE  
NSAWVQTGATIGELYRIAIEKSRVHAFAPAGLCPTVGVGGHISGAGYGVLMRKYGVSADHVIDARIVNVDG  
EILDRESMGEDLFWAIRGGGGASFGVILAWKIRLVPVPPTVTIFIVPKTLEEGATALLHKWQFIGDNVHE  
DLYIGLSMRSVIIISPKGDKTILVSFIGLFLGGSDKLVQHMEQSFPELGVKPHDCIEMSWIKSTVAFGVFS  
NDAPLSVLLDRKNPFPKSYHKVKS DYVTEPLPISVLEGICERFLKNGVDKPEIIMSPYGGRMNDISESE  
IAFPHRKGNYKINYIAEWEEAGSMENHLWIRELYKYMTYVSKSPRSSYLNFKDIDLGQTKNGTATYS  
QAKAWGSKYFKNNFKRLMQVTKVDPNFFSNEQGIPIPFSS

>JDIFADX1

MAFSDSSTVTLTSMILTFTISWAASDSSHENFLQCLDVHSQNSIPVYKPNTTSYTSILKSSVYNLKFSS  
TTAKPLFIITPMHEAHVQTTVVCCRKHRLHIRIRSGGHDFEGLSYVSSAPFVILDLFHLKSIDVDIEDNS  
VWVQAGANIGELYRIAIEKSKVHAFAPAGLCPTVGVGGHISGAGYGVLRKYGVSADYVVDARIVNVDGEI  
LDRKSMGEDLFWAIRGGGGASFGVILAWKLQLVHVPANVTIFIVPKTLEQNATALLHKWQFIGDNIHEDL  
FIGISIRPEEVAPNGEKTILVSFLALFLGGTEKLLPLMEESFPELGLKPEDCIEMSWIKSAVTFGVFSNE  
ASLNVLLDRKNPFPKSFHKIKSDYVKEPLPIAALEEIWRKFLEVGVEKPEIIMSPYGGIMNEIPESAIA  
FPHRKGNIYKINYIVEWLEEGTEATNKHETWIRELYSYMTYVSKSPRASYNFKDIDLGQTKNGSASYS  
QAKGWGNKYFKNNFKRLVHVTKVDPNFFWNEQGIPIPFSS

>MCAFADX1

MSTSIPSIFTLFCVLLISISRASSSSAHQNFLOCLSLHSDQSPIPVYTPNTSSYSSILQYSIQNLRFITP  
TTPKPQLIVTPSHDQSHVQAAVICCRKHGLQIRVRSGGHDYEGLSYMSDVPFVIVDLITFQSIDVDLEDGS  
AWVQAGATIGQVYYRIAETRAYGFPAGGCPTLVGGHFSAGGFGSLFRKYGLAADNIIDARLVNADGQI  
LDKESMGEDLFWAIRGGGAASFGVILSWKIKLVPVPPTVTIFSIGKSLEQGATALVHRWQYIAYELPKDL  
LLAVFMRRVNASQEREGTVQATFLSVFQGRTEQLLHIMDQRFPELGVKSEDCMEMSWIQSSLYLAGFPID  
GPADVLLQRNQSRRFFKAKSDFVKEPIPETALEGIWKRFYEVETPEMILVPYGGRMSEIPESELPHYSHRK  
GNMYSIQYLAWWEQEGPKADTKNVNWRWRYRYMAPYVSKSPRSAYLNYRDLDLGQSKNGTASYSQARVW  
GIKYYNNNFDRLVQVKSVDPNFFRNEQSIPSPARKEK

>CTRFADX1

ISSTLLVSIHFILVFSISFSASNSPNYESFLSCLSNHSLDHSHPYIPLNTSSYNSILNSSIRNLRFFSSP  
QTPKPHLIIKPLHESHVQAAVICSKKHSFQIRTLSSGGHDYEGLSFTSHLNLPFVILDLFNFQSIDVDVKD  
ETAUVQSGATLGQLYYKIAEKSLIHGFPAGICTTIGVGGHFSGGGYGTLKRKYGLAADNIIDARIVNSNG  
EILDRESMGEDLFWAIRGGGAASFGVILSWKIKLVPVPPTVTVFAISKTVEQGAISLXHKWQYIAHKLXE  
DLMLLVQLRRANSTTQASFRSLFLGRKEQLLQIMQXSFPELGLKREDCIETSWIRSTLFFFDPQFNGSXS  
ILLDRNSIPKVFIAKIKSDFVKKPISEAGLQGIWRRYSEVDDPVTLITPYGGKMVEIAESAIPFPHRNGNI  
YLIGYEVDTWTKGGAEASTKHIGWIRNLYEYLTYPYVSKSPRASAYLNYRDLDLGENRIDGXASYEEAKVWGV  
KYFKSNFDRLVEVKSVDPNFFSYEQSIPPLPNKGASTAYXTFVYLCXKX

>TCOFADX1

MILLSHIFLFSISWSSVLAQENFLQCLSLHSDQPPIPVYTPNTILLNSINPPIIPIQNLRFISSDTPKP  
QVIITPSHESHVQAAVICCRKHGLQIRVRSGGHDYEGLSYTSVDPFVVVDLANFESIVVDVEDRSAWVQA  
GATIGQVYYRIAETSAYGFPAGACPTLVGGHFSAGGYGGLFRKYGLAADNIIDARIVTVDGKISDKES  
MGEDLFWAIRGGGGSGFGVILSWKIRLVPVPPVMTLSTVSRRELGATELVYKWQNIHKLPELDFAVF  
IRRVNGSEETNDKIQAIFLSVFQGRTKQLLQIMEQKFPELGLKSEDCIEMSWIQSALYLAEFPFDGPRDV  
LLNRNQRRLFKAKSDYVKETIPEIGLKIWTFNEVDIPEMILSPYGGRMSEISESALPFHRKGNLKF  
IQYIAWWEKAGAEESKKNINWIRRLYKYMTPYVSKSPRSAYLNYRDLDLGHSNGTASYDQARVWGIKYF  
GNNFDRLVHVKSVDPENFFRNEQSIPSPPEMIMNTES

>CMUFADX1

MGISIWRLSLFQILLFIISSAASAGRENIFQCLSNHSTQSPIPLYVSNTPSYSLILQSSIQNLLFLSPKT  
PKPLFIIAPLHESHVQAAVICCRKHGLQIKIRSGGHDFEGLSYISYVPPFVILDLFNLKSIDVEDQTAW  
VQAGATLGELYKIAEKPTLGFAGICTVGGHLSGGGYGLMRKYGLAADNIVDAQIVNVEGEVLN  
RESMGEDLFWAIRGGGGANFGVILSWKIKLVPVPPTVTIFRVPKTLDQGANGLVHKLQYIAHKLPKDLML  
EVLTVGRANASQAGKKTILIIFQALFLGGREQLLRIMEQSFPELGLKVEDCAEISWFQSALNFSGLPMNAT  
LSTLAVNPFKGSYKIKSDYVKDPISEGLQGIWKNLLEADRLNVLITPYGGRMSEIAAETPFPHREGNI  
YQISYLVSWNKEEAESIGWLRKLYKMEPYVSKSPRSAYLNYRDLDLGHEFKNGTSSYARAKVWSSSY  
FGNNFDRLVQVKSVDPNFFRNEQGIPPVN

NCS

>BPEBETV1

MGVFNYTEATSVIPAARMFKAFILDGDKLVPKVAPQAISSVENIEGNGGPGTIKKINFPEGFPFKYVKD  
RVDEVDHTNFKYNYSVIEGGPVGDTLEKISNEIKIVATPDGGCVLKISNKYHTKGNHEVKAEQVKASKEM  
GETLLRAVESYLLAHSDAYN

>PBRNCS1

MMRKVIKYDMEVATSADSVWAVYSSPDIPRLLRDVLLPGVFEKLDVIEGNGGVTVDIAFPFGAVPRSY  
KEKFNVIDRVKRLKEVIMIEGGYLDMGCTFYLDRIHVVEKTPNSCVIESSIIYEVKEEFADKMAKLITTE  
PLQSMAEVISGYVLKRLQVFGFEIKPNLRFNLLLCLIIICLVIAGGMLIGRVP

>TFLNCS1

MMKMEVVFVFLMLLGTINCQKLILTGRPFLHHQGIINQVSTVTKVIHHELEVAASADDIWTVYVSWPGLAK  
HLPDLLPGAFEKLEIIGDGGVGTILDMTFVPGFEPHEYKEKFIKVDNEHRLKVKQMIIEGGYLDLGVTYYM  
DTIHVVPTGKDSCVIKSSTEYHVKPEFVKIVEPLITTGPLAAMADAISKLVLEHKSNSNSDEIEAAIITV

>PS0NCS1

MSKLITTEPLKSMAEVISNYAMKQQSVSERNIPKKQSLRKEITYETEVQTSADSIWNVYSSPDIPRLLR  
DVLLPGVFEKLDVIEGNGGVGTVLDIAFPLGAVPRRYKEKFKINHEKRLKEVVMIEGGYLDMGCTFYMD  
RIHIFEKTPNSCVIESSIIYEVKEEYAGKMAKLITTEPLESMAEVISGYVLKKRLQVFGFEIKPKLRFNL  
LLCLIIICLVIAGGMFVAGVPL

>PS0NCS2

MSKLITTEPLKSMAEVISNYVIQRESFSARNILNKNSLVKKEIRYDLEVPTSADSIWSVYSCPDIPRLLR  
DVLLPGVFEKLDVIEGNGGVGTVLDIVFPPGAVPRSYKEKFNINHEKRLKEVIMIEGGYLDMGCTFYMD  
RIHIFEKTPNSCVIESSIIYEVKEEYAGKMAKLITTEPLESMAEVISGYVLKKRLQVFGFEIKPKLRFNL  
LLCLIIICLVIAGGMFVAGVPL

>CJANCS1

MRMEVVLVVFVLMFIGTINCERLIFNGRPLLHRVTKEETVMLYHELEVAASADEVWSVEGSPELGLHLPDL  
LPAGIFAKFEITGDGGEISILDMTFPPGQFPHHYREKVFVFDHKNRYKLVEQIDGDFDLGVTYMDTIR  
VVATGPDSCVIKSTTEYHVKPEFAKIVKPLIDTVPLAIMSEAIKVVLENKHSSE

>PBRNCS2

MMRKVIKYDMEVATSADSVWAVYSSPDIPRLLRDVLLPGVFEKLDVIEGNGGVGTVLDIAFPPGAVPRSY  
KEKFNIDRVKRLKEVIMIEGGYLDMGCTFYLDRIHVVEKTPSSCVIESSIVYEVEVEEYADAMSKLITTE  
PLKSMAEVISNYVIQESVSARNIFNRQSVVKEIHYDLEVPTSADSIWAVYSNPDIPLLLRDVLLPGVF  
EKLDVIEGNGGVGTVLDIVFPPGAVPRCYKEKFTMDHQKRLKEVIMIEGGYLDMGCTSYLDRIHVIEKT  
SKSCIIKSSVYEVKQECAEAISKLITTEPLKSMAEVISNYVLKKQSVSDTNIAKKQSVLRKEITYETE  
VQTSADSIWNVYSSPDIPPTT

>PBRNCS3

MDIIEGDGGVGTVLDVVFQPGAVPQSYKERFETVDHEKRILEVRIIQQGYLEMGCTSYLNRMHVIEITSK  
SCVIKSSVIYDVKEECADAMSKLITTIQLESMAKVVADYVLKKQASDTSIPKKQSLMRKEITHEMEVQT  
SADSIWDIYSSPDIPRLLRDVLLPGAFKLVHVIQNGGVGTVLDIALPLGAVPRNYKEKFKINHEKRLK  
EAVMIEGGYADMGCTFYMHRIHVLEKTPKSCVIESSIVYEVEVEEYADKMSKLITTEPLQSMAEAISSYVL  
KKQFQVFGLEVKPKLVLSLFLCLIIIFLAIVGGFLIGGLKA

>PBRNCS4

MIEGGYLDMGCTFYLDRIHVVEKTPSSCVIESSIVYEVKQECAEAISKLITTEPLKSMAEVIANYVLKKQ  
SVSDTNIPKKQSVLRKEITYETEVQTSVDSIWNVYSSPDIPRLLRDVLLPGVFEKLDVIEGNGGVGTVLD  
IAFPLGAVPRRYKERFVKINHEKRLKEVVMIEGGYLDMGCTFYMDRIHVFDKTPNSCVIESSIIYEVKEE  
YADKMAKLITTEPLQSMAEVISGYVLKKRLQVFGFEIKPNLRFNLLLCLIIICLVIAGGMLIGRVPL

>PBRNCS5

MMRKVIKYDMEVATSADSVWAVYSSPDIPRLLRDVLLPGVFEKLDVIEGNGGVGTVLDIAFPPGAVPRSY  
KEKFNIDRVKRLKEVIMIEGGYLDMGCTFYLDRIHVVEKTPSSCVIESSIVYEVEVEEYADAMSKLITTE  
PLKSMAEVISNYVIQESVSARNIFNRQSVVKEIRYDLEVPTSADSIWAVYSNPDIPLLLRDVLLPGVF  
EKLDVIEGNGGVGTVLDIVFPPGAVPRRYKEKFNINHEKRLKEVIMIEGGYLDMGCTFYLDRIHVVEKT  
SKSCIIKSSIVYEVKQECAEAISKLITTEPLKSMAQVIANYVLKKQSVSDTNIPKKQSVLRKEITYETE  
VQTSVDSIWNVYSSPDIPRLLRDVLLPGVFEKLDVIEGNGGVGTVLDIAFPLGAVPRRYKEKFKINHEKRL  
LKEVIMIEGGYLDMGCTFYMDRIHVLEKTPNSCVIESSIIYEVKEEFADKMAKLITTEPLQSMAEVISAY  
VLRKRFEVFGLEIKQLRYNLLLCLIIICLVIAGGMLIGRVPL

>SCANCS1

MRKELTHEMEVPASADAIWAVYSSHDIPRLLKEVLLPGVFEKLDVIEGNGGVGTVLDIAFPPGAVPRRYK  
EKFKINHEKRLKEVIMIEGGYLDMGCTFYMDRIHVVEKGNPNSCVIESAIIYVVKDECADVVPPLITTEP  
LASMAEVISNYVLRKQIRLFGYVIKPKLGLSILLSLILCLVILGVLLIGGVPL

>CMANCS1

MIEGGYLDMGCTFYMDRIHVVKGNPNSCVIASAIIYEVKEEFVDVVVPLITTEPLASMAEVISNYVLKKQ  
RRVRKELTYEMEVPASADSIWAVYSSHDIPRLLKEVLLPGVFEKLDVIEGNGGVGTVLDIAFPPGAVPRT  
YKEKFKINHEKRLKEVVMIEGGYLDMGCTFYMDRIHVLEKSPNSCVIESSIIYEVKEEFADVGVPLITT  
EPLASMSEVISNYVLKKQIRMGYVIKPKLGLSLLLCFILCLVLLGVLLIGGVPL

>SDINCS1

MRKEVRYEMEVPTSADSIWAVYSSHDIPRLLKEVLLPGVFEKLDVIEGDGGVGTVLDIAFPPGAVPRTYK  
EKFVTINHEKRLKEVIMIEGGYLDMGCTFYMDRIHVLEKGPKSCIIASAIIEVKEEFADVVVPLITTEP  
LASMAEVISNYVLKKQRRVRKELTYEMEVPTSADSIWAVYSSHDIPRLLKEVLLPGVFEKLDVIEGDGGV  
GTVLDIAFPPGAVPRTYKEKFKINHEKRLKEVVMIEGGYLDMGCTFYMDRIHVLEKGPNSCVIESAIIEY  
EVKEEFADVVVPLITTEPLASMAEVISNYVLKKQIHVFGYVIKPKLGLSLLLCFILCLVLLGVLLIGGVP  
L

>ECANCS1

MIGGFDMGCTFYMDRIHVVAKGPNSCIIKSTLIYEVKEEYADAMASLITVEPLASMAEVVANYVLHQV  
RVLGSKVSRKELTHELEVAAPADAIWGVYSSPDIPRLLRDVLLPGVFEKLEVIQNGGGVGTVLEIVFHPGA  
IPRRYKEKFVTINHHKRLKEVVMIGGYLDMGCTLYMDRIHVVSJKGPNSCVIKSTLIYEVKAESADAMAST  
ITIDPLASMAQVISNYVLKNQMQLGSKVSRRELTHELEVAASADAIWGVYGSKRYSKASQGCASFACFRK  
VRSH

>ECANCS2

MIGGYLDMGCTLYMDRIHVVEKGPNSCVIKSTLIYEVKAHEYADAMASLITVDPLASMAQVISNYVLKNQG  
QVLGSIKRRRELKHELEVAVSADAIWGVIGSKDIPRLLRDVLLPGVFEKLDVIEGDGGVGTVLEIVFPPGA  
VPRKYREKFKVDHEKRLKEVIMIGGYLDMGCTFYMDRIHVVAKGPNSCIIKSTLIYEVKEEYADAMASL  
ITVEPLASMAEVVANYVLHQVVRVLGSKVSRKELTHELEVAASADAIWGVYSSPDIPRLLRDVLLPGVFEK  
LEVIQNGGGVGTVLEIVFHPGAIPRRYKEKFVTINHHKRLKEVVMIGGYLDMGCTLYMDRIHVVSJKGPNS  
CVIKSTLIYEVKAESADAMASTITIDPLASMAQVISNYVLKNQMQLGSKVSRRELTHELEVAASADAIW  
VYGSKDIPRLLRDVLLPGVFEKLEVIQNGGGVGTVLEIVFPPGAIPRRYKEKFKVDQKLRLKEVIMIGG  
YLDMGCTFYMDRIHVVPKGLNSCVIKSTLIYEVKDEYADAMSSLITVEPLASMAEVSANYVLNKKKLMIT  
RKELTHELEVAASADAIWSVYSSPDIPRLLRDVLLPGVFEKLEVVQNGGGVGTVLEIVFPKGSVPRRYKE  
KFKINDEKRLKEVIMIEGGYLDGCTFYMDKIHVLPKGPNSCVIESLIYEVKEENAKAMASLITVEPL  
ASMAEVVANYVLKKQIRVLGYVVKPRVGYSVLVGLLLCLVLLGVLLLSGVNI

>AMENCS1

MRKEVVYELEVPTSADSIWAVYSSNIPITLLRDVLLPGVFEKLDVIEGNGGGVGTVLEIVFPPGAVPRXYK  
EKFINIDNKKRLKEVIMIEGGYLDMGCTFYMDRIHVIAETPNSCVIKSSIIYDVKKEYAEAMSKLITTIP  
LKSMEVIANYVLKNQSVIRKEVTYELQVPTSD

>AMENCS2

MKFELVNELEVPASANDVWAIYSSPDFPKLLTKLVPGILESVEYVEGDGHLGTVIHLVYVPGSVPLSYKE  
KFVTIDHEKRLKEAVHVEGGFLEMGTFFYMNSFEIIEKGSDDCIIRSMKCEIEDKEIMNLISHISVANV  
TVLAMTISKYVQQHKK

>TFLNCS2

MKMEVVFVFFMILGTINCQKLILTGRPFLLNRQGIINQVSTVTKGVHHELEVAASADDIWSVYVSWPGLAKH  
LPDLLPGAFEKLEIIGDGGVGTILDMTFTPGFEPHEYKEKFIIVDNEHRLKQVQMIIEGGYLDLGVTYYM  
TIQVIPTGTNSCVIKSSTEYHVKPEFVKIVEPLITTGPLAAMAEAISKLVLVLEHKYKSNSEIDASKNNLK  
MVINM

>TFLNCS3

MKMEATVVFVFLMFLGTINCQKLIMAGRPFLLHHQGIINQVSTVTKVLHHELEVAASADDIWGVYSSPHLVF  
HLTDLLPGAFEKQVIGDGGVGTILDMTFAPGEPHEYKEKFIIVDNEHRLKQVQMIIEGGYLDLGVTYYM  
DTIQVPTGTNSCVIKSSTEYHVKPELLKIVEPLITTGPVAAMAEAISKLVLVLEKYKSHSDEIHAGLNNN  
LKMVINNI

>TFLNCS4

MRKELTHEMEVPASADAIWAVYSSPDIPRLLKEVLLPGVFEKLDVIEGDGGVGTVLDIAFPPGAVPRAYK  
EKFMKVNHEKRLKEVEMIEGGYLDMGCTFYMDRIHVVEKGPNSCVIESAIIEVKEDEFADVVVPLITTEP  
LASMAEVISNYVLKNQFRVFGYVIKPKLGLSLLLCFILCLVLLGGLLIGGVP

>TFLNCS5

MRKELTNEMEVAASADEIWAVYSSPNLPLKIVQLLPAVFERIYILEGDGGVGTVLYILSPPGSVPRSYKE  
KFITIDHEKRLKEVQEIIEGGYLDMGVTFYMDTFYILEKGPNSCVIKSMTTYEIKDELADKVASLISIDSL

VGMAKAITKYVLDQKKAADVSSA

>BTHNCS1

MVVAASADDVWAIYSSHDLPKLIVKLLPSVFKSIEIVEGDGGLGTVLDVKYPPGSIPLHYREKFITIDNE  
KRLKEVRQIEDGLLALGCTFYMDSFHILEKDCHHEFFHIHEKNCHKKCIKSTTVYEVPELAYKIEPLV  
TIDSLVGMHAISKYVLDKSC

>CCHNCS1

MYFFLEFFEKLDVIEGNGGVTVDIAFPPGAVPRSYKEKFKVDHKNRLKEVVMIEGGYLDLGCTFYMD  
RIHVLPKGANSCVIKSTLIYEIPDELVDVSGSLMSTEPLASMAKVISDYVLKQRKMTANKILRKELKTEM  
EVATSADSIWAVYGSPDIPRLLRDVLLPGVFEKLDVIEGNGGVTVDIAFPPGAVPRTYKEKFKVDHK  
NRLKEVVMIEGGYLDLGCTFYMDRIHVLPKGPNTCVIKSTLIYEVPEFADAVGSLISVEPLASMAEVIS  
GYVLKQKKEAKKILRKELTHELEVPTSADSIWAVYGSPDIPRLLRDVLLPGVFEKLDIVEGNGGVTVD  
IAFPPGAVPRSYKEKFKVDHDKHLKEVVMIEGGYLDLGCTFYMDRIHVLPKGPNSCVIESLIYEVREE  
LADVVGSLISIEPLASMAEVISSYVLKQQLRVFGVVVQPRVGLSLLLCLILCLVILGGLLIGVSI

>CCHNCS2

MRKELRHELEVATSADSIWAVYGSPDIPRLLRDVLLPGVFEKLDVIQNGGVTVDIAFPPGAVPRTYK  
EKFKVDHKNRLKEVVMIEGGYLDLGCTFYMDRIHVLPSPGNTCVIKSTLIYEVPELAYSVASLISVEP  
LASMAEVISGYVLRQRKMTTNKILRKELTTEMEVPTSADSIWAVYGSPDIPRLLRDVLLPGVFERLDVIE  
GNGGVTVDISFPPGAVPRSYKEKFKVDHKNRLKEVVMIEGGYLDLGCTFYMDRIHVIPKGPNSCVIK  
STLIYEIPGELVDVSGSLMSTEPLASMAAVISDYVLKQRKMTANQILRKELTTEMELATSADSIWSVYGS  
PDIPRLLRDVLLPGVFERLGCH

>CCHNCS3

MMRKELVHEKEVCASADAVWGVYSSNIPPTLLRDKLLPGMFKRLEILEGDGGVTILLLEFNNPAIIPHT  
YLEKFMKLDHEKRLLEVEVVKGGYLDLGCTFYMSRIHILEKGPNSCVIESTLIFEAPEELMEYVSQYANL  
ESLISMAEVIISKYVLEQQFRVFGVVVKLKLGLSTIVLLCIFIFLVIVLGLWIEGVSI

>CCHNCS4

MRKHLVNELEVVPADTLWAIYSTTQFPKLIVQLLPIVVQNIIEIDGDGSLGTVLNVIFVPGSVPLSYKEK  
IVTIDHEKRLKEVVQIEGGYLDLGCSFYMSSFQILEKGRDSCIIKSMVTYELAKDADPSVADLVITIAAHA  
AIAQVISKYVLDKQVAAAP

>CCHNCS5

MRKELTNELEVAAPADAVWAVYSSPDLPKIIVELLPSVFEKIEIVEGDGGVTVLYVVFPPGSVPLTYKE  
KFVTIDHEKRLKEVLQIEGGYLDLGCTFYMDSFHILEKDCDSCIIKSITAYEVRDDVDNVSSLISIDSL  
ANMAEAISKYVLEKQEAATKHGHGDDRERTGLCWPFNCLG

>NDONCS1

MRKGIVFLFLVFLGCEVSQGRQLLESRLFRKSTIQKVLHHELPVAASAQEVWDVYSSPELPHLPEILPG  
AFEKVVVTGDGGVTVLEMFVPPGEVPRSYKEKFKVLIDDEQLLKKVEMIEGGYLDMGCTFYMDTIQIVPT  
GPDSCIIKSSTEYVVKPEFADKVVPLISTIPLQAMAEAISNIVLANKAKNKSIIIEI

>NDONCS2

MVFPPGEVPRSYKEKFKVLIDDEQLLKKVEMIEGGYLDLDCVHIKRTSHVQISTFNHFDMGCTFYMDTIQ  
IVPTGPDSCIIKSSTEYVVKPEFADKVVPLISTIPLQAMAEAISNIVLDKTKDQRNKEVINTNTKNNKIH  
HRYVATIVIIR

>NDONCS3

MRSIVFLVFLFLGCEISQGRQLLESRLFRKSTIRKVLHHELPVAASAQEVWDVYSSPELPHLPEILPG  
AFKVVVTGDGGVTVIEMVFPVPPGVPHRYKEKFKVLIDDEKFLKKVEMIEGGYLDMGCTFYMDTIQIVPT  
GPDSCIIKSSTEYVVKPEFADKVVPLISTVPLQAMAEAIKIVLEFKAKHKGFIIEI

>NDONCS4

MEVAASAGDIWAVYSSPDLRPLIVQLLPTVFEKIDIVEGDGGVTVLHITFPPGSVPLTYKEKFKVTIDNA  
NRLKEVLQIEGGYLELGCTFYMDSFQIFEKGIDSCIIKSMTTYEVPELADKVAPLISIDSLVPMAEAIS  
KYVIEKRH

>CTRNC1

MIKKELKHEMRVAASADDIWAVYSSPDLPNLILRLLPSVFDNIEIVEGNGGVTVLHLTFPPGSVPLSYK

EKFVTINGNKRLKEVKQIQGGYLDMGCTFYMDSFHIEEKGCDSVCVIVSKTEYEVPNEEIANQVELYISID  
SLASMAQGHGLCS

>HCANCS1

MKMAILFVFLMFLGKMNSEGLHLSGRPLLRAIISDKPNVIKVLKHELAVPASADKVWAVYSAPTLAFHLS  
DLLPGAFEKVEVFGDGGVGTIIDMTFAPGEFPHEYKEKFIIDGKQRLKKVQMIIEGGYLDLGVTYYMDTI  
HVVP TGSNSCIKSSTEYHVKPEAAKLEPLITTEPLAAMA EVITKIVLENKSKSSEENQSSEAI

>NSANCS1

MVQFSRESKQISIIISDEEEEGEEETKEKKMMKVQVALAFLILGAASCQELILQGRPLLGGARAWGTSI  
KKELKHEFKVAASADEVWSVYSAPELCKHLTDLLPGAFEDVEIIGDGGVGTILHMIFFPPGEFPHEYKEKFI  
VVIDDKQRLKKVEMIEGGYLDIGVTYYMDTIHVVP TGSNSCVIKSSTEYHVKPEFEKIVEPLITTVPLAA  
MAEAIKIVLDNKTHSITI

>NSANCS2

MVKIQLVLAACLLLVGAVNCQKLILQGRPLLGAWACGTIKKVLKHEFKVAASADEVWSVYSSPELCKHLT  
DLLPGAFQDLEIIGDGGVGTILHMTFPPGEFPHEYKEKFLVLDKRLKKVEMIKGGYLDIGVTYYMDTI  
HVVP TGSNSCVIKSSTEYHVRPECEKIVEPLITTEPLAAMA EAVSKIVLDAKIHSIITI

>MCANCS1

MIKKELKHELEVATSADEIWEVYSSPDLPI LIVKLLPSVFEKIEILEGDGGVGTALRLTFPIGVSPLTYK  
EKFVTINDWKRLKEVKQIEGGYLDMGCTFYMDSFHILRKGPKSCVIVSKTEYEVPNKEIASKVEPYISID  
SLRKMATAISDYVLRATRKEVKHELEVAASADDVWEGYRSPDVGSLICPHVFEKIELVEGDGGVGTILQ  
ITHPPGYVPHTYKEYVTLDHKLLEVEQIEGGYLEMGCTFYMDSIHVVKKGDNSCVIVSKAKYEVPE  
LASQVEPYIAADAVANMARIISNNVLEKKKS

>XSINCS1

MRMEVVLVVFLLFIGTVNCERMIFSGRPLLHRVTNEETVILYHELEVPASVDELWSVEGSPELGKNLPDL  
LPGIFADFKITGDGGEISILDMTFPPGQFPHHYREKVFVFDHKNHYKLVQ MIDGDFDLGVTYYYMDTIRV  
VATGPDSCVIKSSTEYHVKVEFAKIVKPLIDTVPLAIMSEAIKVVLEKKYKRSE

NMT

>MTUMMA2

MVNDLTPHFEDVQAHYDLSDDFFRLFLDPTQTYSCAHEREDMTLEEAQIAKIDLALGKLG LQPGMTLLD  
IGCGWGATMRRRAIAQYDVNVVGLT LSKNQA AHVQKSFDEM DTPRDRRVLLAGWEQFN EPVDRIVSIGAFE  
HFGHDRHADFFARAHKILPPDGVLLLHTITGLTRQQMVDHGLPLTLWLARFLKFIATEIFPGGQPPTIEM  
VEEQSAKTGFTLTRRQSLQPHYARTLDLWAEALQE HKSEAIAIQSEEVYERYMKYLTGCAKLF RVGYIDV  
NQFTLAK

>AMENMT1

MCLFFAEKMLMAEANNQQQLKEDLLKNMELGLIPDEEIRKLIRVQLEKRLNWGYKSTHEQQLS QLLHL  
VHSLKKMKIATEMENLDL KLYEAPFSFVQIQHGSTIKESSGLFKDESTTLDEAEIAMLDLYTKRAKIEDG  
QSVLDLGCGLGAVTLVVAQFKNCYVTGITSSVEQKDFIEGRCKELKLSNVKVIADITTYETE EKYNRI  
FAVELIEHMKNYELLRLKISEWMKQDGLL FIEHVCHKT LAYHYEPLDEEDWYTNYIFPAGTLTLSSATLL  
LYFQDDVAVVDQWTL SGKHYSRSHEEWLKRIDGNI EEVKEIMKSITKSEEEAKLLNFWRIFCMCGAELF  
GYKNGE EMMTHILFKKK

>AMENMT2

MDNCKVEGMMKKETRAAEEILGRLLKGEIKDEELRKL IKFQFQKRLEWGYKSTHHQQLSFNLD FIKSLKNM  
DMSGEIETM NKETYELPTEFLEAAF GKTMKQSGCYFKHESTTIDEAEEASHELYCERAQIKDGQTVLDIG  
CGQGGLVLYIAEKYKCHVTGL TNSKAQVNYIEMQAKKLGLSNVDVILADVTKYDSDKTYDRLLMIEAIE  
HMKNIQLFMKLSTWMTKDSLLFVDHICHKTF SHPFEAVDEDDWYSGFIFPPGCVTILSSDALLYFQDDV  
SVVDHWVINGMHMARSVEAWRKKLDKNMKA AKEILLPGLGGNHEAVNQIVTHIRTF CMGGYEQFSYNGE  
EWMVAQMLFKKK

>AMENMT3

MALKKIMEMPYAATVRVMLASLERNLLPDAVIRQLTRLLLSTRRLRGYAPSAHLQLAQLLQFAHSLRDMP

IAIKTEDPKVQHYELPTSFFKFLVGENLKYSCCYFNDSSTLDDAEKAMLETYCERSGLEDGHTVLDVGC  
GWGSLSIIFIAKKYSKCKITGICNSTTQKAFIEERCRLDLHNVEIIVADISMFDMEASYDRIFSIEMFEH  
MKNYKELLKMISRWMKPDSELLFVHHFCHKTFAYHFEDINEDDWITRYFFSGGTMPANLLLYFQDDVSVV  
NHWLVNGKHQAQTSEEWLKRMDKNMSSVRPIMESTYGKDSSVKWTVYWRTFFIAVAELFGYSNGEEMVA  
HFLFKRK

>BTHNMT1

MEVKQAGKEGVTPELLVKRMELGLVPEEEIRRLMRIQIQKRLDWGYKPTHEEQLAHLTKFIQNIRGMKAD  
EIDALDAKMYEIPLPFLQITCGKTLKFSPGYFKDESTTLDSEETLMDLYCERAQVKDQGSILDLGCGHG  
GFVLHLAQKYRNSVVTGVTNSVSETEYIKEQCKKLGLSNVEIIIADVTKFEPEVTVYDRVFAIALIEHMKN  
YALVLNKISKWVAQDGYLFVEHHCHKVFPYKYEPLDEDDWYTNIFPGGTLILPSASILLYFQEDVTVLN  
HWSLSGKHPSRGFIEWLKRLDENIDVIMGIFEPFYGSKEEATKWINYWRVFCMTHSEMYAYNGEEMVLS  
QVLLKRK

>BTHNMT2

MDSKQAKKASVVELLERLEEGLVSDEELKKLHVHVKLEKRLQWGYKPTHQEQLAFHLDIFIKSLKQMDIAGD  
MEMMNSSEYELPISFLKTMFGKTLKQSACYFESESVTIDEAEIAMNALHCERARLKDQGRILDIGCGQGS  
LIFHIANKYKNCLLTGITNSCTQKTYIEEQCKNLKLSNIKVLADVTKYETEDKFDRIVIEALEHMKN  
ELFLKRTSKWMKEDGLLFVDHVCHKVFPDKFEELDEEDWYSEYIFPKGSVIVNAASTLLYFQDDVSVIDH  
WIINGKNMARSHEEMKNLVKNVDVAKDILKVAMGSEEAERICIHCNRFHLSMSELSFYQNGEEMVSH  
VLFKKR

>BTHNMT3 TRANSLATION OF A FRAGMENT OF BTMT3

MGGALIEVSGQKLSKAELLKNIIEGLIPDDELRLMRGELAKRIQWGYKPTHEQQVAQAINFAHSLRMMK  
IANEAETLVEEVYEMPMSFLRLMLGPTLKLSCLYFKNEFTTLEQAEIDTMDMYCKRAGIQDGMISLDLGC  
GQGSLLTHIAHKYKNCRITALTNSASQKGNIEDQCKLQNLPNVKVILADIANFDMDETFRVMVIELFEH  
MKNYALLLKKMAKWMSSDGLLFVDTLQKTFPYHFDPIDEDDWYTNLLFTPGETSILPSASFLLYFQDDVS  
IANHWTISGKHFSRTNEEWLKRIDGQVNEIRAVLKSFLGTEKGVKELINYWRGFCLSGMEMFGYDNGEEM  
MTAHYLFRKK

>CCHNMT1

MATSDQEVKTSKMEMIADLLKRLEAGLVPDEIRSLIRVELERRLKWGYKSTHQEQLDQLLNLAHSIKKM  
KIASTEMDGLTSTMYEVPISLVQIQLGSHLKESCLYFKDETTTVDEAEIAMMDLYLERAQIKDQGSILDL  
GCGLGAVSFHIAQKYTSCNITAVTNSVRQKEFIEEKSKTLNPNVKVLLADITTEMEHTFDRLFAISLI  
EHMENYELLRLKLEWMMKQDGLLFIHCHKTLSTYHFEPMDEDDWYTNLLFPAGTLTLVSASFLLYFQDD  
LSVVNQWVMSGKHFSRANEWLNMDAKMDEMREIFESITDSEEEVVKLINHWRFICISSAEMFAYNDGE  
EWMNSHVLFKKKKQIQ

>CCHNMT2

MAGSGANKEMIADLLKRLEAGLVPDEEIRSLIRFQLKRRLKWGYKTTHQEQLQLLSLAHSIRKMKIATE  
MDALNSTMYEVPISFMQIVFGSTLKECLYFKDEATTVNEAEIAMMDLYLERAQIKDQGSILDLGCGMGS  
LCFHIARKYTNCNITAVTNSVSQKEFIEEKSKTLNPNVKVILADITTEMDDTYDCLFAIGLIEHMKNY  
ELLLRKLNSWMKQDSELLFIDHVCHKTLAYHYEPIDEDDWYTNLLFPAGTLTLVSASFLLYFQDDLSVDH  
WSMSGKHFSRTNKEWLNIDGKMDKIREIVKSITDSEEEVVKLINHWRLCINSSEMFGFNDGEEWMNSH  
VLFKKKKQI

>CCHNMT3

MIKKSKIMAFSDHHHEVKNHSHKEMIADLLKRLEAGLVPDEEMRNLRFELERRLQWGYKSIHQEQLSQ  
LLKLAHSTKEMTIVAEMDALNSSMYELPISFLQIQLGSNLKQSSLYFKDELTTVDEAEVAIMDLYLERAQ  
IEDGQSILDLGCGLAGFSFHVARKYTNCNITAVTNSLTQKEFIEKSKILNIQNVKIVIFADVTTVEMETT  
FDRVFAIGLIEHMKNYELFLKLSKWMKQDGLLFIHFCHKTLAYHYKPIDEDDWFTNLLYPNGTVISSS  
LLLYFQDDVSVVDHWSLSGKHFSRASEESLKRMDAKMDEMKEIFESITDSKEEAMKLINQWRIFCISCAE  
MFGYNNGEEMTSHFLFKKKL

>CCHNMT4

MAVEEGGIGATTEISTKKPEIAELLRKLELGLIPDEEIRRLIRIELGRRLKWGYKPTYEQQLAEVQKLAH  
SLRDMNIAKEIDTLDEQMYEVPISFLQIMFGSTIKGSCCYFKEDSMTLDEAEIAMLDLYCERAQIKDQGS



VLDLGGCGGALTLHVAKKFKNSRVTAITNSVSQKEFIEEQARNLNL TNVTVTLADITKHEMEDRFDRILV  
IELFEHMKNYELLRLKISNWMTKDGFLEHCHKTFAYNYEPIDEDDWYTEYIFPAGTMIIPSASFFLY  
FQDDLTIANHWTLSGKHFSRTKEEWLKRDLANKDAVMAIMEEFSGSKEDAVKWTNYWRGFCFSGMEMYGY  
NNGEEMACHVLFKKD

>CCHNMT5

MEVVATSSARNPKKEIVDLWKRMEGLIPDEEIRDLMKIGLEKRLKWGYKPTHEQQLSOLLHFAKSLRSM  
KMASEMETLDDQMYETPTAFQQLMCGSTIKESAGFFKDESTTLDEAEIKMLDLYCEKARIEDGQKILDG  
CGHGAVMLHIAQKYKNCNVTGVTNSISQQQFIVQRSKELNLSNVNMILADVTMLEMDATYDRIFIIGLIE  
HMKNFELFLRKISKWITKEGLLLEHYCHKTFAYQCEPVEDDWYMMFIFPPGTLILPSASFLLYFQDDL  
IVVDRWTLNGNHARTQEEWLKRIDANVDGVKQMFESVCDGNKEEAVKLMNFWRIFCISGAEMLAYNNGE  
EWMISHYLFKKRN

>CCHNMT6

MGSSTASDHMVMENDSKNKQVVIADLLKRLVGGGLVPDEEMRNMFRFELEKRLKWGYKSTHQQQLSOLL  
NLVELNKGIAKIAPEMDALNSAMYEVPIPYLKLMLGSTLQKQSLYFKDESTTLDEAEIEMMDLYLERADI  
QDQGSILDLGCGGLGFHIAQKYISCNITALTNSLTQKEFIEEKCKTLNIPNVKVLADVTTVEIETTF  
DRLFAIGLVEHMENYELFLRKLKSKWMKQDGLLLEHCHKTLAYHYKPIDEDDWYSNLLYPTGTLTSASF  
LLYFQDDL SVVDHWSLSGKHFSRATEEWLKMIDANMDKIREIYESVTESKEEATRSINQWRIFCISCAEM  
FGYNDGEEWMISHFLFKKKQIE

>CCHNMT7 CCHRT1PF\_ASSEMBLED CCHRT1PF\_REP\_C216

MGINFLERLKGREVSDEELKKQIRIWEKRLQWGYRSTHEDQLKSNLDFVKSLKEMKMSGDIDTFNNESY  
ELPSEFLESFQKTIKQSAKYFKHESMTIDEAEDASHELICERAQIKDGQTVLDIGCGHGLLVLYIAQKY  
KNCHVTGLTNSRAQVNYIEMQSKLNL TNVEAILADVTKEHFKTEKTFDRIILIEAIEHMKNIELFMKKL  
STWMTESLLFVDHICHKTFNHHFEAMDEEDWYSGYIFPKGCVTILSSSALLYFQSDVSVDHWVNGNH  
MARSVQEWLKKLDDNMETVRGILEPAMGGSKEAVDQVITHSRTFCMGAYEQFSFNNGEEMVAQILFKKK

>CCHNMT8

MAVVNILERFRKREIGDEEFKQHRSIWKRLQWGYRSTHEEQLNSNLDLFIKSLKKMDMSGDIDKYNTQE  
YELPSEFQKIIFGKSIKQSGCYFKEESKTKLDEATDDSHELYCERAQIKDGQTVLDIGCGNGGLLVLYIA  
QKYKNCHVTGLTNSKAQVKHIELQTKLNL TNVEVILADVTKHVFKTEKTFDRIILIQVIEHMKNIELFM  
RKLSTWMTESLLFVDHICHKTFNYHFEPMDENDWYSGHIFPEGCVTILSSSALLYFQKDVSVLDHWVWN  
GKHMARSAQEWLKSLDDNMEKVRILEPSMGGNKEAVDQVLTQSRFFCMGAYEQFSNNNGEEMFAQLLF  
KKK

>CCHNMT9

MEMEKGSSSGVKILERLKKGEISDEELKHIRVHWEKRLQWGYKPTFQEQLQSNLDFVKSLKEMEMSGEV  
EIPLNIGESDEVSNYQKKRKSSELSEYL GAMFGKTLKQSAKYFKDESMTLDEAEAAAYELICERAQIKD  
GQTVLDIGCGHGLLVLYIAQKYKTVGLTNSKTHVNYIEMQCKKLQLSNVDVILADVTKYDTEKTFDR  
IVVVGTEIEMKNIGLFMKKLSWMMKKEGLLFDHTCHTSFNYHFAMDEDDWYSGYIFPKGSVTLSSSA  
LLYFQEDVSVDHWL LSGMHMARSMEWMMKIEQNMDTLRSLLEQTMEGGSNEAVNQVVTHLRTFCIGAY  
ETFSYNNGEELMMAQFLFKKK

>CCHNMT10

MAGEKREMERLQLPYDATVRMMLNALERNLLPDLVIRKLRLLLSRRLRWGYKSISDLQLSHLLQFAHS  
LEEMPIAIKTDAAKTQHYELPTSFVKLVLGKNMKYSCCFDKSNTTLEDAEIAMLELYCERAQIKDGHTV  
LDIGCGWGSLSLFIKSKYKCKITGICNSTTQKTHIQDQCRDMNLQNVIIIVADISTFDMESTYDRLVSI  
EMFEHMKNYKELKKISKWMMKQDSLFFVHHFCHKTFAYHFEDTNEDDWITRYFFTGGTMSANLLLYFQE  
DVSVVNHVNLVNGKHYALTSEEWLKRMDKNLDSIKPIMESTYGKDSAVKWTVYWRFFISVAELFGYNNGD  
EWMVAHLLFKKK

>CMANMT1

MGSIDEVKKESAGETLGRLLKGEIKDEELKKLIKQFEKRLQWGYKSSHQEQLSFNLDLFIKSLKKMEMSG  
EIETMKNKETYELPSEFLEAVFGKTVKQSMCYFKHESATIDEAEAAHELYCERAQIKDGQTVLDIGCGGQ  
GLLVLYIAQKYKNCHVTGLTNSKAQVNYLLKQAEKGLTNVDAILADVTQYESDKTYDRLLMIEAIEHMKN  
LQLFMKKLSTWMTKESLLFVDHICHKTFAHFFEAVDEDDWYSGFIFPPGCATILAANSLLYFQDDVSVD

HWVVNGMHMARSVDIWRKALDKNMEAAKEILLPGLGGSHEAVNGVVTHIRTFMGGYEQFSMNNGDEWMV  
AQLLFKKK

>CMANMT2

MEDQQTLLCVFLCKLKKMQLMAKEELLQNMELGLIPDQEIRQLRVELEKRLQWGYKETHEEQLSQLLDL  
VHSLKGMKMATMENLDLKLYEAPMEFLKIQHGSNMKQSAGYYTDESTTLDEAEIAMLDLYMERAQIKDG  
QSVLDLGCGLGAVALFGANKFKKQFTGVTSSVEQKDYIQGKCKELKLTNVKVLADITTYETEERFDRI  
FAVELIEHMKNYQLLLKKISEWMKDDGLLFVEHVCHKTLAYHYEPVDAEDWYTNVFPAGTLTLSSASML  
LYFQDDVAVVNQWTLGSKHYSRSHEEWLKNMDKNIVEFKEIMRSITKTEEEANRLNFWRIFCMCGAELF  
GYKNGEEMLTHLLFKK

>CMANMT3

MGVEITESNAKKAEVAELLRKLELGLLPYDEIRRLMRIELGRRQLQWGYKPTYEEQLAQVVKLARSLRSM  
NIATEIDTLDEQMYEVPPIFLQLMFGSTIKGSCCYFKDESTTLDEAEIAMLDLYCERAQIQDQSVLDLG  
CGQALTLHVANKYKNCRVTAVTNSVSQKEFIEEKSRKLNLNKNEVMLADITTHEMEDTFDRILVIELFE  
HMKNYELLLRKISKWMSNDGLLFIHICHKTFAYHYEPIDEDDWYTEYIFPAGTMIIPSASFLLYFQDDL  
SVVNQWTLGSKHFARTKEQWLKRLDANVDEVMKIMESFSGTKEGAVKWTNYWRGFCLSGMEMYGYNNGEE  
WMASHVLFKK

>CMANMT4

MASGKVVDLLKRLDSGLVSDLEELRRVIRFELERRLKWGYKPTHEQQLAELNLAHATKQMEIATKIDTLN  
STMYEVPNSFLEIQLGSTLKESCLYFKDESTTVDEAEIAMMDLYLERAQIKDGGIILDLGCGLGALAFHI  
AQKYTNCNVTSTNSVKQKEFIEEKCKILNVSNVKVIILTDICTLEMEATFDRIFAIGLIEHMKNYELLLR  
KFSAWMKQDGLLFIHLCHKTLGYHNEPIDEDDWYTAFFPAGTLTFIPSSFLLYFQDDVSVVNHWTLSG  
KHFSRSNEEWLKRMDNKIDEVKEIYKAAASETKDDDIMKLIRLWRFLSISAAEMFGYKDGEEMISQVLF  
KKK

>CMANMT5

METGKNNQNMKTTIDDLWNQMMLGIVPDKEIRRLMKIELKKRLDWGYRPTHQQQLSQLLDFAKGLCNYCW  
TALRCMKMSAEFDTLDSKVYETPKSFQQIMCGTTIKESSGLFMNESTTLDQAQISMLDLYFDKAKIKDGO  
SILDLCGCGHALILYLAQKYQNCNITGVTNSLSQKEFIVEKCKKGLSNVEILLADVTKLEMEDMFDRVF  
VIGLIEHMKNFELFLRKISEWMKPDGLLFLHYCHKSFAHQWEPIDEEDWFSKYIFPPGTVIIPSASFLL  
YFQEDVKVIDHWTLGHNHFARTQEEWLKGIDGHIDEVEKTFESFYGISKEEAVKLINFWRVFLSGVEMF  
GYNNGEEMISHLLFKK

>CMANMT6

MGSSEAPSVIGSSKAGEIMGRMLKGEIGDEELSKLVRHQWERRLQWGYKPTHEQQLACNFDIFIKSLKDMD  
MSGEIDTMNEETYELPSAFLEATFGKTIKQSGCYFKDETTTLDEAEAEASHELYCERAQIKDQGTILDIGC  
GQGLLVLYIAQKYKNCHVTGLTNSKAQMNYILMQAKKLQLSNVDVISADVTKFDNDKTYDRILVIEAIEH  
MKNIQLFLKLLSTWMMKDSLLFVDHISHKKFNHHEALDEEDWYSGFIFPKGCVTILSSSTLLYFQDDVS  
VVDHWVVNGMHMARSMEEWRKLDKNMEAAAREILEPGLGSKEAVNQVITHIRTFCLGGYEQFSFNNGEEW  
MITQMLFKK

>CMUNMT1

VDPVEQKNDKKAELLRKLELQVQPYDEIKRLIKVELDRRIQWGYKPTFEQQTADVLSFAHSLRKLNIATA  
VDTLDSEMYEVPISFLKIMFGNTIKGSCCYFKDSDVTLDEAEIAMLDLYCERSQIKDQQRVLDLGCQGA  
LTMHVARKFRNCHVTGITNSVSQKEYIEEQCKINNLNVEIKLADITTHEMEDRYDRILVIELIEHMKNY  
ELLLRKISEWLTDPGLLFIHICHKTFPYHYEPLDEDDWFTEYIFPAGTMIIPSANFLLYFQDDVTVVNH  
WTLGSKHYSRTHESWLKNIDANAEEAVKKIMVSFTGSEDAALKQMNYWRGFNLSGMELYKYRNGEEMASH  
VLFKKK

>CMUNMT2

MAAGGGEFGDRVEQKLNKKGEVAELLRKLELGGELPDDEIRRLIKLQLDLRRIRWGYKPSHEQQVAYLLDF  
ANSLRKLNIATAVDALDSEMYEVPPIFFKFMFGSTVKASCCYFKDDFVTLDEAAIAMLDLYCERSQIEDG  
QRVLDVCGVGLTMMHVARKYKNCHVTGVTNSVAQKDYIEEQCKINSLTNVEIKLVDISSHEMEEKYDRI  
LAIAFIEHMKNYELLLRKISKWLAPEGLLFDHVCQKTFPYHYEPIDEEDWYTEYIFPAGTMIIPSANLL  
LYFQDDVTITNHVLSGKHFSRTHMWLKNLYANAKAMKEIMVSFTGSEAAAKQMNYWRGFALSGMELF

GYENGEEMASHLLFKKK

>CMUNMT3

MANMGGFNGEAPSLSNRGEVAELLRKLGLGLIPDEEIRNLMRVQVQRRLQWGYKPTFEQQLAQVVHFAHS  
LKQMPISLEAEAMESQVYEIPNSFMKLLHGSSMKASWCYFINDSTTLDEAEIAMLELYCERSQIRDGDRV  
LDLGC GFALSTYIARKYPNCQVTGVTNSTFQKEFIEDQCKKDNLVNVEVILADVTTHEMDREFDRIMAI  
GVIEHMKNYKLLLRKISKWMKQDGLLFVDHICHKAFAYHFEPLGAEDWIEEYIFPGGVMTIPSANLLLYF  
QDDVYVNVHWMVNGKHYSRTNEEWLKRDLGNANVARAILEGSIGSKEEAMKMLNYWRTFCLYGIELCKFN  
NGEEMSSHVLFKKK

>CMUNMT4

MEVKQSKGDELRSRVAELLERPELGLVPDEEIRRLAKARLEKRLKWGYKATHGEQLSSLLQFVESLPSLN  
MASEDDSPKAWLYETPTSFLQLIYGDIIKESGSYYKDESTTLEEAMIHNMNLCCERANIKEGQSVVDLGC  
GYGAFILHVAQKYKTCRVGTITSSISQKHIMEQCKLNL SNVEVILADVATIKLDATFDRVFAAGMFEH  
VNDYKSF LRKITNWMKPDGRLFVEHLCKNTFPYQNKPLDDGDNWGEYVFPSSGLIIPASLLLYFQEDVS  
IVNHWTFSGKHAANKFEELLKRIDAKIDAIRIFNECYGSKDSIRFINYWRVFLITAAEMFGYNNGEEM  
GVHLLFKKK

>CMUNMT5

MEAKQHESSNNIDEELKNRVNIGEQEERPGFEDEEIRRLAKAQLAKRLKWGYKPTHEQQLSHLLQFLQSL  
PSLNMASEDESSKAWLYETPTSFLQLLFGNVIKFSGYYYKHESSTFEESMIHNMNLCCERANIKEGQNV  
DLGCGYGAFVLHVAQKYKSCSVTGITCSITQKHHIMEECKLNL CNVKVILADVATIELGTAFDRVFAFG  
MFEEINDYKILRKISNWMKPDGLFFVEHLCHKTLAYQNKLIDDQDWYEEYIFPSGGLIIPASLLLYFQ  
DDL SVVYHWTYNGKHGARSFEKMLERTDANIDTIKDMFTEFYGSKEKAIFINYWRVFFITAAEMFAYND  
GEEWMCSQLLFKKK

>CMUNMT6

MTSEALKATKAEVLEKLGGLIPDEEAKRLIRDQLERRVQWINTHDCEQRLAHLHNYVQSLRQADLDTTN  
GFNPDTYEMPIAFMKLIQGRMLKLCYFKNKSTTLEDAEEEMLDLYCERAQIRDGDQILDGSGYGLA  
IYVARKYPHCHVTAITNVKSQTKFVKEQCKNYKLNVEVVLGDITKVELNKEFDRVMAIEVFHEIKNYEL  
LLKKISKWMKQDGLLFVENMCHKNHSYQMKPLHEDDWIEEYIFPDEIVTIAADLLLYFQKNVSIANHWV  
LNGKHISRSEAWLNRLLDDNANA AAVLKDFLGSEDEAVKWINQFRLSFIHGIMQGEFNNGEEMIAHFL  
FKKK

>CMUNMT7

MEALFQVPYNTVKMLLGS LERALLPDMVRRRLTRLLLAARLRQGYKPSSQLQLSDLLHFAQSLQDMP  
IRTDPKEQHYELPTSF FKLVLGKNMKYSCCYFLDKSSLEDAENAI LELYCERAHLKDGHVLDVGGW  
GSLSLYIAQKYPNCRVGTICNSTTQKACIEERCRELQVNNVEIIVADISTLEMEGTFDRVFSIEMFEHMK  
NYKELLKKISKWMTQEGLLFVHYFCHKTFAYHFEDLSDDDWITRYFFTGGT MPSANLLLYFQEDVSILNH  
WLVNGKHYAQTSEEWLKRMDCNLASIKPIMESTYGKAEAVKWTVYWRVFFI AVAELFGYNNGEEMVAHF  
LFKKK

>CMUNMT8

MEHKIEDIRKLSRVEEQLERPELGLVKDEDIKTLAKAKLEKRLKWGYKPTYAEQLSNLLQFAQSLPSLK  
MENVDDQGSSKQWLYGVPSEFLQIIYGGIIKMSGSYEDESTTLEESMIKMDSCCEKANVKEGHSVLDI  
GCGYGSLIIHIAKKYRTCNTVTGINTFVEQKQYIMEECKLNL SNVEVIVGDGTTINLNTTTFDRVFTGM  
LEEINDYKFLKSVSDWMKPDGLLLVTHFCHKTFAYQNNKALDDEDWHNEYIFPSGNLIVPSASLLLYFQ  
EDLSVVS HWATNGTHTGRTCKLVERIDANIEKIKEIFSEFYGSKEDAIRMINYWRVLCITGAEMYTCKD  
GEEWMDVYYL FKKK

>CMUNMT9

SEFLEAVFGKTVKQSMCYFKHESATIDEAEEAAHELYCERAQIKDGQTVLDIGCGQGGLVLYIAQKYKNC  
HVTGLTNSKAQVNYLLKQAEKLG LTNVDAILADV TQYESDKTYDRLLMIEAIEHMKNLQLFMKLLSTWMT  
KESLLFVDHICHKTF AHFFEAVDEDDWYSGFIFPPGCATILAANSLLYFQDDVSVVDHWVNGMHMARSV  
DIWRKALDKNMEAAKEILLPGLGGSHEAVNGVVTHTIRTF CMGGYEQFSMNNGDEWMAQLL FKKK

>CTRNMT1

MAVGAGDNRDLVEPKNDKKEEVAELLRKLLELGHVPDDEIKRLIKVELDRRIQWGYKPTYEQQTADVNF

HSLRKMSIATEMDTLDSEMYEVPISFFKLMFGSTIKASCCYFKDDSTTLDEAEIAMLDLYCERSQIKDGO  
RLLDLGCQGALTMHVGRKYKNCRVTVTNSVVSQKEYIEEQCKINNL TNVDVILADITTHVMDDRYDRIL  
VIGLFEHMKNYELLRLKMSSEWMTPEGLLFIEHACHKTFAYHYEPLDEDDWFTEYIFPSGTMIIIPANFLL  
YFQDDVALVNHWTLSGKHYSHTHEWWLKNIDANAEAVKKIMESFTGSEEAQVQLNYWRGFNLSGMELFK  
YRNGEEMASHVLFKKK

>CTRNMT2

GLKSSVAELLERPELGLVPDGEIRKLTKTRLAKRLEWGYKATHEDQLSHLLRFIHSPLSLNMASEDDSPK  
AWLYETPTSFLQLIYGDIKESGTYKDESSTLEEAIHNMDLCCERARIKEGQSVLDLGCYGAFTLHV  
AQKYKSCSVTGITSSISQKDYIMEQCKLNL SNVEVILADVATIKMNTTFDRVFALGMFEHINDYKFLR  
RISNWMKHDGLLFVEHL CNKTFAYQNKPLDDGDDWFNEYVFP SAGLIIPSASLLLYFQEDVSI VHHWTF S  
GKHAAYKFEELLERIDAKIEAIKEIFIECYGSKEDAIRFINYWRVFLITAAEMFAYRDGEEWMSGHVLFK  
KK

>ECANMT1

MVDLKVKEEELLKSMELGLVPDEDIRKHIRSQLEKRLKWGYKPNHEQQLAQLLDVIHSLKMKISKEYES  
FDLRLYEAPFDHFKIQLGTHLKESCSYKDESTTLDEAEGAMLDLYTQKAKIEDGQSILDLGCYGAFTLHV  
FVANKYKNCKVTGITSCQWQKDFIENKCKELNL TNVRVIGDVTAYEMEETFDRIFAIELIEHMKNYELL  
LRKISKWMMKDDGLLFIEHVCHKILAYPYEPIDEEDWFTEYIFPGGTLTLSSASLLLYFQDDVSVVEHSSL  
NGKHYSRSHGEWLKNIDANIDEVKGIMRSITKTEEEAVRLVNFWRIFCMGIELFGYNNGEEMVSHILL  
KKK

>ECANMT2

MAADLVVKKWNNKELIDEMELGLVGDEEIRELIRNDLEKRLKWGYKSNHEQQLAQLLHFVHSLRGMKIA  
ADEVESFNKIVYEAPFSFNKIQLGSSLKESCYKHDETTLDEGEIAMMELYTEKAQIKDQSVLDLGCY  
LGSALTLYVANKYPNCKVTGTTASLWHKDFIESKCKEQELTNVKIVLGDATTHEMEERFDRILAIGLIEHL  
KNYGLLLGRISKWLKDDGFLFIQHVCHKTAYPLVPVDEEDWIGEYIFPGGTLT MPSASLLLYFQDELSV  
VDHSTLNGKHF SRTHEEWLKNIDAKIDEVKEILKSVTKTEEEVRLTNFWRIFCMFGVEMFGYNEGEEWM  
LSQILFKKK

>ECANMT3

MASLVEEGSFVNNKESVKERVSELVKRLKNGLVSDLELRKLMRVELEKRLEWGYKSTHEQQLSQLIDLAH  
SMKKMEIAMEIDALNSTVYEVPLSFLQIIHGTTIKESCLYFKDESTTVDEAEIAMMDLYLERAQIKDQGS  
ILDLGCGLGGFSFHIAASKFTGCNITAVTNSVKQKEFIEEKCKTLNVPNIKVILADICTTEIENVFDRIIA  
IGLIEHMKNYELLLKFKSKWMTQDGLLFIEHLCHKTFGYHNEPLDEDDWYTTYFFPAGTLTFIPSSFLLY  
FQDDVSVVDHWT LNKHFARSNEEWL KRMDEKMDVQKIFRSNLKSENEVTKTIGEWRF LMSAAEMFGY  
NNGEEMVSQLLFKKK

>ECANMT4

MALEQEDSMSVPERNEGVADLIKRMELGLVNDEEIRRLMRIQIENRLKWGYKPTHDQQLAQLHLHFINSK  
EMKMATEMDSLDSQVYESPNSFQQIMCGRSMKESAGLFMDVTTVEEAHIRMMMDLYCDKATFEDGQKILD  
LGCYHGSVVLHVAQKYKGCQVTGVTNSSAQKQYILEQCKKLDLSNVEIILADVTTLEMEEFDRV IIGL  
IEHMKNFKLFFQKVS KMKEGGLLFLENYFHKDFAYHCEKIDEDDWDYGYIFPPGSLLMPSASTLLYFQE  
DLTVADHWLPGTHFAKTFFFLKIDLRIEEVREIFEAFYGISKEEAMKLSNYWRNFCISAMEIFNYNN  
GQEWMI SHLLYTKK

>ECANMT5

MDALIQVPYNATVKVMLSSLERNLLPDVVIRKLT KLLLASRLRLGYKPTSDLQLSDLLQFLHSLEEMPIA  
IKTDTAKTQHYELPTSFFNLVLGSHMKYSCCYFTDESKSLEDAEEAMLELYCERAQIKDGHVLDVVGCGW  
GSLSLYIAQKYSNCKITGICNSVTQKAHIEEQSRELNLNNVEIIVADISTHEMEASYDRILSIEMFEHMK  
NYKELLLKISNWLKQDSSLFVHHFCHKAFAHYFEDTSEDDWITRYFFTGGMPSANLLLYFQDDVSVVNH  
WLVNGKHYAQTSEEWLKRMDKNLNSIKPIMESTYGGESAVKWTVYWRFFISVAELFGYNNGEEMVAHF  
LFKKK

>ECANMT6

MGSSAGEIMGRMLKGEIEDEELKKLIRHQWDRRIEWGYKPTHEKQLAFNLDFIKGLKEMVMSGEIDTMNK  
ETYELPTAFLEAVFGKTVKQSCCYFKDENSTIDEAEEAAHELYCERAQIKDQGTVLDIGCGQGGLVLYIA

EKYKNCHVTGLTNSKAQANYIEQQAELKELTNVDVIFADVTKFDTDKTYDRILVVETIEHMKNIQLFMKK  
LSTWMTEDSLLFVDHISHKTFNHNFEALDEDDWYSGFIFPKGCVTILSSSTLLYFQDDVSALDHVVVNGM  
HMARSVEAWRKKLDEIEAAREILEPGLGSKEAVNQVITHIRTFICIGGYEQFSYNNGEEWMITQILFKKK  
>ECATNMT

MGSSAGEIMGRMLKGEIEDEELKCLRIRHQWDRRIEWGYKPTHEKQLAFNLDFIKGLKEMVMSGEIDTMNK  
ETYELPTAFLEAVFGKTVKQSCCYFKDENSTIDEAEEAAHELVCERAQIKDGQTVLDIGCGQGLVLYIA  
EKYKNCHVTGLTNSKAQANYIEQQAELKELTNVDVIFADVTKFDTDKTYDRILVVETIEHMKNIQLFMKK  
LSTWMTEDSLLFVDHISHKTFNHNFEALDEDDWYSGFIFPKGCVTILSSSTLLYFQDDVSALDHVVVNGM  
HMARSVEAWRKKLDEIEAAREILEPGLGSKEAVNQVITHIRTFICIGGYEQFSYNNGEEWMITQILFKKK  
>GFLNMT1

MDLMATSKQVKKKEELLKNMELGLVPDEEIRRLIRIELEKRLKWGYKPTHQQQLAQLLDLVHSLKMKMIA  
TEMESLDLKYEAPFSFVQIKHGSTIKESSYFKDESMTLDEAEIAML DLYVERAQIEDGQSVLDLGCGL  
GAVTLHVAKKYKNCHVTGLTNSVEQKDFIEGKCKELNLSNVKVLADVTSHEMEDKFDRIFAVELIEHMK  
NYELLLRRISKWMDGGLLFIHVCHTFAYHYEPIDEDDWYTEYIFPAGTLTSSASLLLYFQDDVSVV  
NHWTLSGKHYSRSEEWLKRIDGNMDAVKEIMKSITKTEEEAVKLINFWRIFCMCGAELFGYKDGEEWMM  
SHVLFKKKQLLQCC  
>GFLNMT2

MGSNEAQVKKESIGEIMGKLMQGEIGDEELSKRIKEIFGKRLQWGYKPTHQQQLAFNLDFIKSLKEMDMS  
GEIDTMNEETYELPSAFLEAAFGKTIKQSGCYFKDETTTIDEAEEASHELYCERAQIKDGQTVLDIGCGQ  
GGLVLHIAQKYKNCHVTGLTNSKAQKNYILMQAEKLQLSNVDVILADVTKHESDKTYDRILVIETIEHMK  
NIQLFMKKLSTWMTEDSLLFVDHICHKTFSSHFEAIDEDDWYSGFIFPKGCVTILSASALLYFQDDVTIL  
DHVVVNGMHMARSVDAWRKKLDKNMELAREILLPGLGSKEAVNGVITHIRTFICMGGYEQFSYNNGEEWV  
AQMLFKKK  
>GFLNMT3

MDSKEVGIMKKESAEIILGRVMKGQIEDEELRELKIFQFERLLQWGYKPTLQQQLAFNLDFLKSLELEM  
SGETEAMNKETYELPTAFLEAIFGKTIKISACYFKDELMTLDEAEAEACHELYCERAQIRDGQTVLDIGCG  
QGSLILHIAQKYKNCHITGITNSNGQKNYITTAQAEKLQLSNVDVILADVTKFDMKTFDRVSVIGTIEHM  
KNMALFMKKVSSWMDGGLLFDHVCNKTFSHHYALDEDDWYSGYKFPKGSVTILWANALLYFQDDVSV  
VDHWLLNGMHMARTQVEWGKLNKNIEAVKEILEAGLGSKEAANQVITHMRTCGIGGYEQFSYNNGEEW  
ISHVLFKKK  
>GFLNMT4

MTMEANNAKKEAIEENLWEQMMMGLVPDHEITRLMKSELQKRLNWGYKPTHQQQISQLLDFAKSLRRMEMS  
LDFDNLELDTKMYETPESFQLIMSGTTLKESSGLFTDETATLDQTQIRMMDLYLEKAKIKDGQSILDLGC  
GHGALILHVAQYRNCNVTVTNSIAQKEFIFKQCKLGLSNVEMVLADVTKCEMKAATFDHIFVIGLIEH  
MKNFELFLRKVSEWMSDGLLFMEHYCHKSFAQWEPMDDDDLFSKYVFPFGSAIIPASFLLYFQDDLT  
VVDHWTLSGNHFARTHQEWLKRIDSQSDEIKGIFESFYGISKEEAVKLINYWRVFCFLFGVEMFGYNNGEE  
WMISHLLFKKK  
>GFLNMT5

MGSNETNGELKTKEMVPDLLKRLESGLVADEELRKLIRFELERRLKWGYKPTHEQQLAELLKLAHSTKQM  
KIATETDSLNSTMYEVPPIFLQLQFGSAIKESCCYFKDESTTLDEAEVAMMDLYLERTQIKDGQSILDLG  
CGLGALAFHIVQYPCNVLAITNSVEQKEFIEEKCKIRKVENVKVSLADICTLEMKTTFDRIFAIGLLE  
HMKNYQLLLKFSNWMKQDGLLFIHLCHKTLAYHYEPLDEDDWYTEYFFPAGTLTISSSFLLYFQDDV  
SIVNHWSLSGKHFSRSNEEWLKRMDMKIDEVKEILEAAFENKDHITKLIHWRFLAINATEMFGYNNGE  
EWMVSQVLFKKK  
>GFLNMT6

MGVEITESSTTMANKKAEVGEILLRKLHGLLPYDEIRRLMRIELGRRLQWGYKPTHEQQLSQVLKLARS  
LRTMNIATEIDTLDEQMYEVPPIFLQLMFGSTIKGSCCYFKDDSTTLDEAEIAML DLYCERAQIKDGQSV  
LDLGCQGALTLHVANKYKNCRVAVTNSVSQKEFIEEQSRRNLKNVEVMLADITTHEMEDTYDRILVI  
ELFEHMKNYELLLRKISKWLSKDGFLFIHICHKTFAYHYEPIDEDDWYTEYIFPAGTMIIPASFFLYF  
QDDLTVAQWTLSGKHFAARTKEEWLKRNLNANVDEVMKIMESFSGSKEGAVKWTNYWRGFLSGMEMYGYN

NGEEMACHVLFKK

>HCANMT1

MAVEAQPKKAAIVELLKKLELGLVPYDEIKKLIRIQLERRLQWGYKSTYEEQVADVLDLAHALRKMTIA  
REVETLDSQLYEVPEFLKIMNGNTLKGSCCYFKDDSTTLDEAEIEMLDLYCERAQIKDGQSVLDLGGCGQ  
GALTLHVAQKYKNCRVTAVTNSVVSQKEYIEEQSRNQNSNVEVILADITTHKMDDRFDRILIIELFEHMK  
NYELLRKITEWMAQDGLLFVEHICHKTFAYHYEPLDEDDWFTEYVFPAGTMIIPSASFLLYFQDDVSVV  
NHWTLSGKHFSRTNEEWLKRDLANIDTIKPMFESLTGSEEEAMKLINYWRGFCLSGMEMFGYKNGEEMMA  
SHLLFNKK

>HCANMT2

MSEIAMEGKQAKKESIVELLKKLELGLVPDNEIKQLIRIELARRLQWGYKSTYEEQVAQVLNLAHSLRHM  
KIANEVDTLDSQVYEVSMSFLNIIFGSTMKESCCYFKDDSVTLDDAEVAMLDLYCERAQLQDQGRVLDLG  
CGQGTVTLFVAEKYKNCHVTAIPNSVSQKEYIDEQCRIRNLVNVEVILADITTFEMDDTFDRIFVIGLFE  
HMKNYELLLKISKWMTQDGLLFVDHICHKTLAYHYDPLDEDDWFTEYVFPSTTTIIPSASFLLYFQDDV  
SVVNHWILSGKHLRSTHEEWLKRDLANIGAIRIMFKSLLGKEEAVLKL VNYWRGFCLSGIELFGYNNGEE  
WMVSHVLFKKK

>HCNMT3

MESKQIKKIGSAMEILERLDKGLIPDEELRELVKIQWGRRLKWGYKSTHVQQLFNLDVFKSLKQMDMSG  
KMEVINSESYELPVAFLRAMFGKTLKQSCCYFEDESMTLDEAETAHELICERAQIKDGQRVLDIGCGQG  
SLIIHIAQKYKNCHVTGITNSNAQKNIIEEECRNLKLSNVEVILADVTQYDTKDTFDRILIEAVEHMKN  
IDLFLKKISKWMKDDGLMFIDCICHKTFGHHFEAIDEDDWYSGYIFPKGSVTLQAASLLYFQEDVAVVD  
QWAVSGKHMARTVEEWLKKLDKNIDVAREILEPSLGSKEAVEKVITHSRTFCIGTSEQFSYNNGDEWMIS  
HVLFKKK

>JDINMT1

MSKGVAKLVERMELGLVSDDEVRRMLRILIEKRLKWGYKPTHEEQLYLTNFIQGLKGMKIAEEIDALDA  
KMYEIPAFMQILCGYSLKFSPPGFESTTLDESETIMMDLYCERAQVQDQGSILDLGCGHGGFVLHVA  
QKYKNCKVTGVTNSVSETEYIMEQCKKLGLSNVEIIIADVTKFEPEVYDRVFAIALIEHMKNYELVLQK  
LSKWVAQDGFVFDHCHKVFYPKYEPIDEDDWYTYIFPGGTLVLPASILLYFQEDVSVVNHWTLSGN  
HPARGFKEWLKRLDDNMEIKAI FEPFYGSKEEAMKWITYWRVFCITHSEMYAYNGGEEWMISQVLFKPK  
>JDINMT2

MDVGEANKKESKNAELLKKLELGLVPDNEIKKLIGIQLERRLKWGYKPIYEQQIAQVLNLAHSLQNMNIA  
DEIETLDEHMYEVPISFLKIMNGSMLKGSSSYFRDSSMTLDEAEIAMLDLYCERAQIKDGQSVLDLGGCGQ  
GALTLHVAQKYKNCHVTAITNSVVSQKEYIEDQCKSNLSNVEVILADITKHESDETYDRILVIELFEHMK  
NYALLLRKISKWISKDGLLFVEHICHKTFAYHYQPLDEDDWFTDFVFPAGTMIIPSASFLLYFQDDVSVV  
NHWTLSGKHFSRTNKEWLKRLDAEIDTVKEIFKSSLGTEEAAVKFINYWRGFCLSGMELFGYNNGEEMT  
SHLLLLKKK

>JDINMT3

MDSNQPKKNESVIELLERLDGGQVSLHELKLVLIQLQKRLQWGYKPTFEQQQAFHVDFIKSLKQMDISG  
DMERINAEAYELPISFLKTMFGKTLKQSAFYKDESPTLDEAEMVMNLCERARLKDGTILDIGCGQG  
SLVFHIAKKYKNSLVGMTNSSEQKNYIEEQCRKLSLSNIKVILADVTKYEMEDRFDRVVFIEAIEHMKN  
IQLFLNKVSKWMKEDGILFVEHVCHKVFPEHFEELDNEDWYAEIFPKGSVTVHAASLLYFQDDVTVLE  
HWIMNGKHMGRTHEKWHKNLVKNIDIADKVLQLAFGSKEAAEKINHCLNLFAMSEQFLYNNGEEWMIS  
QIMFKKS

>JDINMT4

MEGLIEMPYNASVKMMLSLLEARNLLPDTMVRKLTCLLAGRLRSCYKPSSELQLSDLLHFVHSLQDMPAIA  
IKTDEPKSQHYELPTSFQVLVGLQNMKYSCCYLDKSNTLEDAEKAMLELYCERAQIKDGHTVLDIGCGW  
GSLALFIAQKFNCKITGICNSTTQKGYIEEQCRHRQLQNVIEIIVADITTFEMEASFDRIFSIEMFEHMK  
NYKELLKISKWQDSSLFVHHFCHKAFAYHFEDTSDDDWITRYFFTGGTMPAANLLLYFQDDVSVVNH  
WLVNGKHYSLTSEEWLQRMDQNMETIKPIMVLTYGKDSAVKWTAYWRTFFISVAELFGYNNGEELVTHF  
LFTKK

>MAQNMT1

MAAVEAETNYNNTTTTCDDTKQEQHKDELLKKWENGSI PDHEIKQLIRAQLERRLRWGYKPTYEQQIAQ  
LLDLAHSRLRKM KIAEVDTLDSQMYEVPISFLRIMNGARLKGSCSYFKDDSTTLDEAEIAML DLYCERAQ  
IQDGHSVLDLGCQGGAFTLHVAQKYKNCRVTAITNSVSQKEFIEDEAKKSNLSNVEVLLADITKHETNDT  
YDRIVVIELFEHMKNYELLRLKISKWISEDGFLFIEHICHKTFAYHYEPIDEEDWFTTFVFPAGTMLIPS  
ASFFLYFQDDVSVVKHWTL SGKHF SRSCETWLKRIDANLDTVKAIFESFLGNKEAATKYLN YWRGFCFSG  
MEMFGCKNGEEMTTHLLLKKK

>MAQNMT2

MKKAEMVKRLEDGLIPDEEIKKL IKVELKRRLELGYKPTHEQQLAQLLHFAHSRLRKM EIANEIEALDSHV  
YEIPVSFLEIFHGPALKQSSCYFKDESMTLEQAEIAML DLYCERAQIQDGM SVLDLGCGLGSLALHIAQK  
CKNCRVTATTNSMSQKYIENRCKSHHLSNVEVILADVATQNMDDTFDRIMVVGLFEHMKNYELLRLKMS  
KWLSDGLLFVDHACHKAFVSHFQPLDDDDWFTEYVFP AETFIIPSASFLLYFQDDVSVVNHWILSGKHF  
SR SHEEWLKKLDTEVDAVKLLFKSFLSEEEAVTKL INYWRGFCFFGMELFAYNNGEEMSSHVLFK KNE

>MAQNMT3

MELGLVPEKEIRRLMRIQIQKRL EWGYKPTHEEQ LAHLTKFIQNIRGMKMADEIDALDAKMYEIPLPFLQ  
TICGKTLKFSPGYFKDESTTLDESETLMM DLYCERAQVKDQGSILDLGCGHGGFVLH LAQKYRNSIVTGV  
TNSVSETEYIKEQCKKLGLSNVEIIIADVTKFEPEV TYDRVFAIALIEHMKNYALV LNKISKWVAQDGYL  
FVEHHCHKVFPYKYEPLDEDDWYTN YIFPGGTLILPSASILLYFQEDVTVLNHWSL SGKHPSRGFIEWLK  
RLDENIDVIMGIFEPFYGSKEEATKWINYWRVFCITHSEMYAYGN GEEWMLSQVLLK RK

>MAQNMT4

MDKANERELKRAELFKKLEDDLVTYDEIKQVMRTELAKRLEWGYKPTHQQQLAHL LDFAHALEGMKIANE  
VETLASEVYETPLPFXEIVLGP AKKXSSCLFEDESTTLEQAEIAML DLYFERAQIRXGMSVLDLGCXGS  
VGLHIARKYKNCXVTCITNSISQKQYIENQCKLYNLSNVKIILADIVAHDTDDTFDVVLVIGVIEHMKNY  
ALLLNKISKWMAKDGLL FVEHLCHKTFPYHFEPLDEDDWYSNFVFP TGTLTMP SVSFLLYFQADVSILNH  
WILSGKNFSRTXEEFLKRIDANVDAIKDGLKPSL GSEGVAKLISYWRGFC LTGMEMFGYNN GEEWMSVQ  
L FKNK

>MCANMT1

MAVSGDMEDKKARVAELLKKLELGLVPYDEIRRL IKVELERRLRWGYKPTYEQQTADV VNFARSLRKMS  
IATEIDTLDSQMYEVPISFLKLMFGNTIKGSCCYFKDDT VTLDEAEIAML DLYCERSQIKDQQRVLDLGC  
GQGALTMHVARKFRNCRVTGVTNSVAQKEFIEEQCKINNL PNVEIVLADITTHKMDDRFD RILVIELFEH  
MKNYELLRLKISEWMPDGLLFIEHICHKTFPYHYEPLDEDDWFTEYIFPAGTMIIP SANFFLYFQDDVS  
VVNHWTLSGRHYRSTHEAWLKNIDANEDAVKAIMESFTGSEEA AVKLMNYWRGFNL SGMELYKYKNGEEW  
MASHVLFKKK

>MCANMT2

MASVDGKALKPKKAEIVELLKKLELGVVPDEEIKHLVRIQLERRLEWGYKSTYEQQISHVLNLVHSLRQM  
SIMTEEVETFDSEFYELPISFWKIKLGRAMKQSCCYFKDEL TTLDEAEIAML DLYCERAQIEDGQRVLDL  
GCGYGS LTLYIARKYPNCHVTGLTNSISQKQFIEEQCKDSNLSNVNIILVDVATHETDETFDRIMVVGLL  
EHMKNYELFLRLLKWMKQDGF LFIDHVCHKALAYIYEPVDEDDWLPECTFPSGTIVIPSAHFLLYFQDD  
ASVVNHWIINGKNYRRTSEEWLKRIDANANALKAIMGVS SRKEDEAVRLTNYWRTLLL FHIELFKYNNGE  
EWMVAHILFKKK

>MCANMT3

MAEEAKSAIEVVELLKKVELGLIPDDEMKS FIRIELERRLQWGYKPTHHQQLS QVLNFADSLRGM DIAMD  
VSSVDWQLYNAPISFLNIIHGRIIKESCCYFEDDSVTVEEA AVAMMDLYCERAKIEDGQRVLDLGCGLGA  
LTMHIAGKYNNCRVTGITTSPSQKFIEDQCLKHNLNVEIILADVITL EMDQTFDRILAIELFEHMKNY  
ELLRLKISKWMTSDGFLFVEHLCHKAFPCHEPLDETDWITNYAFPAGTITMPSAHFLLYFQDDVSI ANH  
WTISGNHCSRTHEELLKRMDKANAVEAIIESFLGSKESARKWISYCRVLHLLSIELFKYNN GEEWMISH  
VLFKRKTVHNSM

>MCANMT4

MDAKEAKKESCVAELLERPELGLVPDEEIRKLTRTQLEKRLRWGYKATHEDQLSHLLQFIQCLPSLNMES  
EGDKPKSWLYETPTSFLQLIYGDTIKESSTYYKDEWSTLEEAITHILDLC CERAKIQEGQRILD LGCYGG  
ALT VHVANKYKSCSVTGVTTSISQKQYITEQCKLNL SNVEVILEDVATMKMETTFDRIFALGIFEHMND

YKFLGRISKWMKQDGLLFVEYLCNKTFAYQNKPLDDGDDWYNEYVFPSSGLIIPSSSFLLYFQDDVSIL  
NHWTFSGKHSARTFEKLLKRIDSKIDAIQEIFNECYGSKEDAIKYINYWRVFLITGAEMFSYNDGEEWVG  
SHFLFKKK

>NDONMT1

MAVMEDGNSDKTVISNKNKAELIKKLELGLVPYDEIKRLMGIEMERRLRWGYKPTHQEQLAQLLNLAHSL  
RKMKIADDEVETLDSQMYEVPISFLRIMNGSRLKGSYFRDDSTTLDEAEVAMLDLYCERAQIKDGQSVL  
DLGCGQALTLHVAQYKRCRVTAITNSISQKKYIEDQCKYNNLLNVEVILADITKHETNDTFDRIMVIE  
LFEHMKNYELLRLKISQWMSQDGLFIEHICHKTFAYHYEPLDEDDWFTDYVFPAGTMIIPSASFLLYFQ  
DDL SVINHWTL SGKHF SRTNEEWL KRLDANVD TVKAI FEESL GSEEAAMKF INYWRGFCLSGITMFGYNN  
GEEWMTSHLLLLK

>NDONMT2

SSKLHRPKKEEILEKLDGGLVSEELKKL VHLQLQKRLQWGYKPSNQQQLAFHLHF IKS LTQMDISGDME  
IINSEYELPISFLKTVFGKTLKQSACYFKNESMTIDDAEIAMNDLHCERAMLKDGLRILDIGCGGSLI  
FHI AKRYRNLVTGITNSFVQKNFIEEQCRNLKLSNIK VILADVTKYEMEDTFDRVLIIEALEHMKNVRL  
FLNKISKWMKADGILFVDHVCHKIFPEHFVGLDEEDWYSEYIFPKGSVTIHAAS TLLYFQDDVKVMDHWI  
VNGKNMARTHEKWLKNLVKNMDVARDILPIALGSKEAAERCINHF RNFH LAMMEQFSYNNGEEWMIS

>NDONMT3

MESVTKVPYNASVRMMLSLLEARNLLPDTIVRRLTRLLLLAARLRLGYKPSSDLQLSDLLHFLHSLQDMP  
IAIKTDKPKAQHYELPTSFQVLVGLGNMKYSCCYFLHKSDTLEDAEKAMLNLYCERAEIKDGHTVLDVGCW  
GSLCLFIAQKYRNCQITGICNSLTQKAYIEEQCRHLQLQNV EIIIVADMSTFEMDASFDRILSIEMFEHMK  
NYKELLKKISKWMKQD SLLFVHHFCHKAFAYHFEDTSEDDWITRYFFTGGT MPSANLLLYFQEDVSVNH  
WLVNGKHYALTSEEWLKRMDKNLGTIKPIMELTYGRDSAVKWIAYWRTFFISVAELFGYNNGDEWVTHF  
LFRKK

>NSANMT1

MEVERKQAKKANIAELLKKLEQGLVPYDEIKRLMRVELEKRLQWGYKPTYEQQLAHLQLAHSLRHMSIA  
HEVDTLDSQLYEVPIEFLKIINGSRLKGSYFENDSTSLDEAEVAMLELYCERAQIKDGQSVL DLGCGQ  
GALTLYFAQKYKNCRVTAVTNSVSQKEYIEEESKKGGLTNVEVVLADITTHEMAHKYDRILIIELFEHMK  
NYELLRLKISKWMAKDGLLFVEHICHKTFAYHYEPLDEDDWFTDYVFPAGTMIIPSASFLLYFQDDVSVV  
NHWTL SGKHF SRTNGEWFNRIDANLDVIKPMFEAL TGSKEEAMKL INYWRGFCLSGMEMFGYKDGEEWMA  
SHVLFKRK

>NSANMT2

MEATQITKKQVAELIKRIENGQVPDEEITRMMKIQIQKRLKLGKSTHEQQLAQLLHFVHSLQKMEMAE  
EVDTL DSELYEIPLPFLHIMCGKALKFSPGYFKDESTTLDSEVNMLDLYCERAQIEDGQTILD LGCGHG  
SLTLHVAKKYRGCKVTGITNSVSQKDFIMEECKLNL SNVEIILEDVTKFETGTTYDRIFAVALIEHMKN  
YELFLKKVSAWMAQDGLLFVEHHCHKVFAYKYEPIDDDWYTEYIFPTGTLVMSSSILLYFQEDVSVV  
HWTL SGKHPSLGFKQLKRIDDNIDEIKEIFESFYGSKEKATKFITYWRVFCIAHSEMYATNGGEEWMLS  
QVLFKRK

>NSANMT3

MGILQSLHEANLIPDVILRKRISLSSWLRDACKPTFQQQLSDELNFARSLEKMPIAAVSDKPNSSQYE  
APTELFLLAFGKQAKFSCSYFADESTPLDDAEAMLELYCERAQIKDGHTILD LGCLGSLCLYIAQRYK  
NCKITGLSYSTTQKAYIEQICRDRMLDNVEI IHADISTYEMEATFDRVFSIEMFEHMRNYKALLKKIAKW  
MKD SLLFVEHCCHKSFYSYFEGTNEEKDISLLESHAHEWYGRYFFTGGTFPSANLLLYFQENVSVKDH  
WLVNGKHF SKTCNEWLKVDKNSSAMEPI MRSLYGKDLAIKWTVYWR TYLIFMGELFGYKNGEEMIAHYL  
FKKN

>NSANMT4

MTMIDGLVQAPYNATVRVMLSSLERNLLPDAVVRKLTRLLL SARLRSGYKPSTEEQLSDLLQFAHSLQDM  
PIAIKTDEPKAQHYELPTSFNLVLGKHMKYSCCYFLDNSNTLEEA EKAMLDLYCERAQIKDGHTVLDV  
CGWGLSALFIAQRYSNCKVTGICNSTTQKAYIDEQCRDRKLQNV EIIIVADISTYEMDASFDRVFSIEMFE  
HMKNYKELLKKISKWMKSDSLLFVHHFCHKSFAYHFEDTSEDDWITRYFFTGGT MPSANLLLYFQEDVSV  
VNQWL VNGKHYAQTSEEWLKRMDKELATIKPIMVTTYGKDLALKWTA YWRTFFISVAELFGYNNGEEWV



VHFLFKKK

>NSANMT5

MGIHDLVQAPQNAITRLLLSFHEANRTPDMVLRAMRSSLAWLNECYKPSYQAQISDLLSFAHSLESMP  
MSTVADEANSQQYELPTEFFELMLGKYLKYSYCNFYVDNSATLDDAEEAMLELYCERAQIKDGHTILDLC  
GWGSLCLYIAQKYKNCKITGISYSKTQKAYVDQLCRDRMLDNVEIVFADICTYETEATFDRIFAVELLED  
MRNYKALLKMISKWMKEDGLLFVHHCGHKAFSYYFEETNKETNISLSETNAREWVGRYFFTGGTLPSANT  
LLYFQEDVSIQVIVSGNHFARTCKEWLKRMNDNLGNIKPMIQRVYGEDSTIKWTAYWRSFLLFLQEMY  
GFNNGEEMITHVLFKKK

>NSANMT6

MGSEQTKKESVAELLERLDRGVVPDEEFIELVKIQLDKRLQWGYKPTAEEQVAFHIGFIDALKKMEISGD  
MEKINSECYEVPISYHSLVFGAALKQSACYFKHDSMTIDEAEIAMHDLYCERSQIKDGQKILEIGCGGG  
LLFHIAHKFKNCNVTGVTNSISQKEFIEEKCRKLEVQNIIEVILADITKYETEDGFDRILLIIGTVEHMKNV  
QLFLKKVSKWMKDDGLFVDHVCHKLFAEQFEALDSDDWYAESLFPKGSVIIHAASLLYFQDDISVANH  
WVLNGKHMAYSHERWLNLLNNRDAAREVLQLSLGSEEAEEKFINHCRMFLAMKEQFSYNNNGEEMVSH  
LLFGRK

>PBRNMT1

MVKGDQFQTTTMEETKISQENDLWTNMEGLIPDEEVRRLMKIEIEKRIEWGMKPTQHQLAQLLDFTKS  
LRGMKMATELDKLDSKLYETPHSFNQIVNGSTLKESGLYTDVTTTMDASIKMMDLYCERANIKDGQTI  
LDLGGCGPLVLHIAKYSNCKITGVTNAFSQREYILEECKKLSLSNVEIILADVTSLDLETTFDRVFI  
GFIEHMKNFELFLRKISKWMKDDAVLFLEHFCHKSFSYHGEPLSEDDWYAKNFFAPGTLVIPSATCLLYF  
QEDLAVIDHWFLSGNHFARTNEEMLKGIDGKIEEIKDIFMSFYGINEAEAVKLINWWRLFCITGAEMFSY  
NNGEEWFISQLLFKKK

>PBRNMT2

MCTTMDTTKISQDDLWKNMELGLISDEEVRRLMKIETEKRIKWGTKPTQQEQLAQLLDNFNKLGRMKMA  
TEVHALENHKEYEIPDSFNQIIGGKESAGLFTDEATTTIEEANTKMDLYCERAGLKDGQTIIDIGCGAG  
LLVLHLAKKYKNCKITGVTNTSWHKEHILEQCKNLNLSNVEIILADVTTVDIERTFDRVFIIGLIEHMKN  
FELFLRKISKWMKDDGLLFLEHLCHKSFSHDWEPLSEDDWYAKNFFPSGTLVIPSATCLLYFQEDVTVKD  
HWLLSGNMFARSNEAILKRIDSKIEEVKIDIFMSFYGIGEEEAVKLINWWRLLCITANELFKYNNNGEEWLI  
SQLLFKKKLMTCI

>PBRNMT3

MGSIEEVRKESAEETLGRLLRGEINDEELKKLIKQLEKRLQWGYKSSHQEQLSFNLDIFIKSLKKMEMSG  
EIETMKNKETYELPSEFLEAVFGKTVKQSMCYFKHESSTIDEAEEAAHELYCERAQIKDGQTVLDIGCGQG  
GLVLYIAQKYKCHVTGLTNSKEQVNYILKQAEKLGRLNVDVMLADVTQYESDKTYDRLLTIELIEHMKN  
IQLFMKKLSTWMTEDSLLFVEHVCHKTFSHFFEAIDEDDWYSGFIFPPGSVTILAANSLLYFQEDVSVVD  
HWVVMGMHTARSFDAWRKKVDKNMEVAKEILLPGLGGSHEAVNAVVTTHIRTFMGGYEQFSLNNGDEWMV  
AHLFLFKK

>PBRNMT4

METLIQVPYNATVRVMLSSLERNLLPDVVIRKLTLLLLASRLRLGYKPSSEIQLSDLIQFAHSLEEMPIA  
IKTESAKEQHYELPTSFFKLVLGKYMKYSCCYFSDKTATLEDAEKAMLELYCERAQIKDGHTVLDVCGGW  
GSFSLYIAQKYKSKITGICNSKTQKEHIEEQCRELQLQNVIIIVADISTFEMEGSYDRIVSIEMFEHMK  
NYKELLKKISKWMKEDSLLFVHYFCHKAFAYHFEDTSEDDWITRYFFTGGTMPSANLLLYFQGDVSIANH  
WLVNGKHQAQTSEEWLKRMDKNISTIKPIMESTYKSDSAVKWTVYWRTFFISVAELFGYNNNGEEMVAHF  
LFKKK

>PBRNMT5

MGSIEEVRKESAEETLGRLLRGEINDEELKKLIKQLEKRLQWGYKSSHQEQLSFNLDIFIKSLKKMDISG  
EIQTVNNETYELPTEFLEAAFGKSIKSSGCYFKHESATIDEAEEAAHELYCERAQIKDGQTVLDIGCGQG  
GLVLYIAQKYKCHVTGLTNSKAQVNYLLKQAEKLGRLTNVDAILADVTQYESDKTYDRLLMIEAIEHMKN  
LQLFMKKLSTWMTESLLFVDHICHKTFHFHFEAVDEDDWYSGFIFPPGCATILAANSLLYFQDDVSVVD  
HWVVMGMHMARSVDNWRKALDKNMEAAKEILLPGLGGSHEAVNGVVTTHIRTFMGGYEQFSMNNGDEWMV  
AQLLFKKK

>PBRNMT6

LKKRGKILERLVNGDIGDEELKLIKIRFEKILQWGYKPTLQDQLTSNIDFIKSLKEMEMSGDLETMNSE  
TYELPTAFLEAALGNTLKQSACYFEDESMTLDEAEIAAYELNSERAKIEDGQTILDIGCGFGGLVLHIAQ  
KYKNCHVTGIANSTAQRNYILSQIEKLLWNVDIILADVTKDFVTEKKFDRILVIEAIEHMKNIQLFMK  
KISKWMKDEGSFLFVEHLCHTAFNHHFEALDEDDWYTSYVLPKGSVTILSLTALLYFQDDVSVVDHWLLN  
GMHMARSQEEWAKKLDKNLDVAKKELKQGLGSEEAANQVITHLRTFFVGGAVQFSFNNGEEMISQLLFK  
KK

>PBRNMT7

MQLMAKEELLRNMEGLIPDQEIRQRIRIELEKRLQWGYKETHEEQLSQELLELVHSLRGMKMATEMENLD  
LKLYEAPMEFLKIQHGSNMKQASAGYYTDESTTLDEAEIAMLDLYMERAQIKDQSVLDLGCGLGAVALFG  
ANKFKNCQFTGVTSSMEQKDYIERKCKELKLTNVKVLLADITTYETEERFDRIFAVELIEHMKNYQLLLK  
KISEWMKDDGLLFVEHVCHKTLAYHYEPVDAEDWYTNVFPAGTLTLSSASMLLYFQDDVSVVNQWTLG  
KHYSRSHEEWLKNMDKNIVKFKIEMKSITKTEEEANKLLNFWRIFCMGAELFGYKNGEEMWMLTHLLFKK  
KLRTPGK

>PBRTNMT1

MGSIDEVKKESAGETLGRLLKGEIKDEELKLIKQFEKRLQWGYKSSHQEQLSFNLDIFIKSLKKMEMSG  
EIETMNKETYELPSEFLEAVFGKTVKQSMCYFKHESATIDEAEEAAHELVCERAQIKDQTVLDIGCGQG  
GLVLYIARKYKCHVTGLTNSKAQVNYLLKQAEKLGLTNVDAIADVTQYESDKTYDRLLMIEAIEHMKN  
LQLFMKKLSTWMTESLLFVDHVCHKTFAHFFEAVDEDDWYSGFIFPPGCATILAANSLLYFQDDVSVVD  
HWVVMGMHMARSVDIWRKALDKNMEAAKEILLPGLGGSHEAVNGVVTHIRTFMGGYEQFSMNDGDEWV  
AQLLFKKK

>PBRTNMT2

MGSIEEVKKESAETLGRLLRGEINDEELKLIKQLEKRLQWGYKSSHQEQLSFNLDIFINSLKKMMSG  
QVEAFTNEVYELPTECFEAYGKSMKLSGCYFKHESSTIDEAEEASHHELVCERAQIKDQTVLDIGCGQG  
GLVLYVAQKYKNCHVTGLTNSKEQVNYILKQAEKLGLRNVDAIADVTQYESDKTYDRILVIGVVEHMKN  
MQLFIKKLSTWMAEDSLLFVDHSCHTFNHFFEALDEDDWYSGYIFPPGCATFLSADSLLYFQDDVSVVD  
HWVVMGMHFARTVDAWRKKLDKNMEAVKEILLPGLGGNHEAVNGVITHIRTCVGGYVQFSLNDGDEWV  
AQLLFKKK

>PSOCNMT

MQLKAKEELLRNMEGLIPDQEIRQLIRVELEKRLQWGYKETHEEQLSQLLDLVHSLKGMKMATEMENLD  
LKLYEAPMEFLKIQHGSNMKQASAGYYTDESTTLDEAEIAMLDLYMERAQIKDQSVLDLGCGLGAVALFG  
ANKFKKCQFTGVTSSVEQKDYIEGKCKELKLTNVKVLLADITTYETEERFDRIFAVELIEHMKNYQLLLK  
KISEWMKDDGLLFVEHVCHKTLAYHYEPVDAEDWYTNVIFPAGTLTLSSASMLLYFQDDVSVVNQWTLG  
KHYSRSHEEWLKNMDKNIVEFKEIMRSITKTEKEAIKLLNFWRIFCMGAELFGYKNGEEMWMLTHLLFKK  
K

>PSOTNMT

MGSIDEVKKESAGETLGRLLKGEIKDEELKLIKQFEKRLQWGYKSSHQEQLSFNLDIFIKSLKKMEMSG  
EIETMNKETYELPSEFLEAVFGKTVKQSMCYFTHESATIDEAEEAAHELVCERAQIKDQTVLDIGCGQG  
GLVLYIAQKYKNCHVTGLTNSKAQVNYLLKQAEKLGLTNVDAIADVTQYESDKTYDRLLMIEAIEHMKN  
LQLFMKKLSTWMTKESLLFVDHVCHKTFAHFFEAVDEDDWYSGFIFPPGCATILAANSLLYFQDDVSVVD  
HWVVMGMHMARSVDIWRKALDKNMEAAKEILLPGLGGSSETVNGVVTHIRTFMGGYEQFSMNNGDEWV  
AQLLFKKK

>SCANMT1

MASDHEVSNKELKKKKEVITELLKRLESGLVSDEELRGLIRFELERRLRWGYKPTHEQQLAQLLNLAHSM  
KOMKIATEIDALNSTMYEVPPIFLQIQLGSTLKESCCYFKDESTTVDEAEIAMMDLYLERAQIKDQSVLDL  
DLGCGLGALAFHIAQKYTNITAITNSVRQKEFIEEKCKILNVSNVKVSADICTLEMEATFDRIFAIG  
LIEHMKNYELLLKFFSEWMKQDGLIFIEHLCHKTLAYHYEPLDEDDWYTEYFFPAGTLTLISSSFLLYFQ  
DDVSVVDHWTLGSKHFSRSNEEWLKRMEKIDEVKEIFESVSDSKDDVTKLINHWRFFCISSEMFGYN  
NGEEMISQVLFKKK

>SCANMT2

MEMIADLLKRLEAGLVPDDEIRSLIRVELERRLKWGYKSTHQEQLDQLLNLAHSIKKMKIASTEMDGLTS  
TMYEVPISLVQIQLGSHLKESCLYFKDETTTVDEAEIAMMDLYLERAQIKDQGSILDLGCGLGSVCFHIA  
RKYTSCNITAVTNSVSQKEFIEEKSKTLNVPNVKVLADITTELEMDDTFDCLFAIGLIEHMENYELLLRK  
LSDWMKQDGLLFIDHVCHKTLSYHFEPMEDDDWYTNLLFPAGTLTLVSASFLLYFQDDLSLVDHWSMSGK  
HFSRTNKEWLKNIDGKMDKIREIVKSITDSEEEVVKLINHWRMLCINSSEMFGFNDGEEWMNSHVLFKKK  
KQI

>SCANMT3

MGGSNEEGKKKINGGLSARAGEIMGRLMKGEIGDDELKKLIRNMWERRLQWGYQPTHHQQLSFNLDLIRS  
LKKMDMSGEIETMNEETYELPTAFLEAAFGTKIKQSACYFKDKSTTLDEAEEASHELICERAQIKDQGTV  
LDVCGCGGLVLHIAQKYKNCRVGTITNSKAQMNYIVMQAEKQLSNVDVILADVTKFSDQTYDRILVI  
ETIEHMKNIQLFMKKLSTWLKDSLLFVDHICHKTFSHHFETLDEEDWYSGFIFPKGCVTLPSASALLYF  
QDDVSVVDHWVNGMHMARSVEEWGKKLDKNMEAREILEPGLGSKEAVNQVITHIRTFICGGYEQFSFN  
NGEEMVAQMLFKKK

>SCANMT4

MSTVEITETSPPLAKKAEVAELLRNLELGLLPYDEIRRLMRIELGRRRLQWGYKPTHEQQLSQVLKLARSL  
RTMNIATEIDTLDEQMYEVPPIFLQLMFGSTIKGSCCYFKGDSTTLDEAEIAMLDLYCERAQIKDQSVL  
DLGCGQALTLHVANKYKNCRVTAVTNSVSQKEFIEEQSRKLNKNVEVMLADITTHEMEDTFDRILVIE  
LFEHMKNYELLLRKISKWMSKDGFLFIEHICHKAFAYHYEPIDEDDWTYEIFPAGTMIIPSASFLYFQ  
DDLSIANHWTLSGKHFAARTKEEWLKRLDANEEVVKIMEPFGSGSKEGAVKWINYWRGFCLSGMEMYGYNN  
GEEWMASHVLYKK

>SCANMT5

MGGVADLLKKMELGLVPDEEIRRLMRIIEKRELEWGYKPTHAEQLDHLTNFIQCLRGMKMADEIDALDAK  
MYEIPLPFMQTICGSTLKFSPGYFKDESTTLDESEIHMMDLICERAQIKDQGSILDLGCGLGGFVLHVAQ  
KYKNSIVTGVTSVAEKEFIMTQCKKCLSNVEIILADVTKFEPETTYDRVFAIALIEHMKNYELVLEKL  
SKWVAQDGFVFEHHCHKVFPYKYEPLDEDDWYTEYIFPGGTIVLPSASILLYFQKDVSVVNHWSLNGKH  
PARGFKEWLKRLDENMDAVKAIPEFPYGSKEEAMKWITYWRVFCITHSEMYAYNNGEEMLSQVLFKRK

>SCANMT6

MAALIQVPYNATVRLMLTSLEKNLLPDVVIRKLTKLLLASRLRLGYKPTSELQLSDLLQFAQSLEDMPIA  
IKTDKPKVQHYELPTSFFKLVLGKYMKYSCCYFSDKSKSLEEAQAMLELYCERAQIKDGHVLDVCGGW  
GSLSLYIAQKYSNCKITGICNSATQKAHIEEQCRDLQLQNVEIIVADISTFAMEATYDRIVSIEMFEHMK  
NYKELLKKISKWMNHSLLFIHFFCHKAFAYHFEDTNEDDWITRYFFTGGTMPSANLLLYFQEDVSIVNH  
WLVNGKHIALTSEEWLKRMDQNLDISIKPIMESTYKDSALKWTAYWRTFFISVAELFGYNNNGEEMVTHL  
LFKKK

>SCANMT7

MDRSSEWISEKRISAKEMEKKAEIRKLELGLIPDDEIKRLLGIQMENRLRWGYKPTHEQQLAQLLDFAH  
SLRKMKIADIELESQLYEMPVSFMKIMNGSKLKISSSYFKDSDMTLDEAEVAMLDLYCERAQIKDQGT  
ILDLGCGMGAFTLHVAEKYKSCRVTISITNSVSQKEYIEDQCRSNLLNVEVILADITKYEMYDITYDRIMA  
IGLLEHMKNYELLLSKISKWMSQDGFVFDHICHKTLAYQYEPLNEDDWFTDYIFPPGTFMIPSATFLY  
FQDDVSVVNHWTLSGKHFERTHEEWLKRIDANIDTVKVILEEALGNKEAMKFINYFRNLCLFGITMFGY  
NNGEEMMSHLLKK

>SDINMT1

MQLMAKEELLRNMEGLIPDQEIQRIRIELEKRLRWGYKETHEEQLSQLELVHSLRGMKMATMENLD  
LKLYEAPMEFLKIQHGSNMKQASAGYYTDESTTLDEAEIAMLDLYMERAQIKDQGSVLDLGCGLGAVALYG  
ANKFKNCQFTGVTSSMEQKDYIERKCKELKLTNVKVLADITTYETEERFDRIFAVELIEHMKNYQLLLK  
KISEWMKDDGLLFVEHVCHKTLAYHYEPVDAEDWYTNVFPAGTLTLSSASMLLYFQEDVSVVNHWTLSG  
KHYSRSHEEWLKNMDKNIVKFKIEMKSITKTEEEANKLLNFWRIFCMGAELFGYKNGEEMMLTHLLFKK  
K

>SDINMT2

MGEVITESSNAKKAEVAELLRKLELGLLPYDEIRRLMRIELGRRRLQWGYKPTHEEQQLAQVIKLARSLRSM  
NIATEIDTLDEQMYEVPPIFLQLMFGSTIKGSCCYFKDESTTLDEAEIAMLDLYCDRAQIQDQGSVLDLG

CGQGALTLHVANKYKNCRVTAVTNSVSQKEFIEEKSRKLNLNKNEVMLADITTHEMEDTFDRILVIELFE  
HMKNYELLLRKISKWMSNDGLLFIEHICHKTFAYHYEPLDEDDWYTEYIFPAGTMIIPSASFLLYFQDDL  
SVVNQWTLSGKHFAARTKEQWLKRLDANVDEVKIMESFSGSKEGAVKWTNYWRGFCLSGMEMYGYNNGEE  
WMASHVLFKK

>SDINMT3

MGSNEAPSVNGSSNAGKIMERLMKGEIGDEELSKLVRHMWERRLQWGYKPTHEQQALFNDFIKSLKHMD  
MSGEIDTMNEETYELPTAFLEAAFGKTIKQSGCYFKDETTTLDEAEAEASHELYCERAQIKDGQSVLDIGC  
GQGGLVLHIAQKYKNCHVTGLTNSKAQMNYILMQAEKLQLSNVDVISADVTKFDTDKTYDRILVIEAIEH  
MKNIQLFMKKLSTWMKEDSLLFVDHISHKTFNHHEALDEEDWYSGFIFPKGCVTILSSSTLLYFQDDVS  
VVDHWVNGMHMARSVEEWRKKLDKNMEAAAREILEPGLGSKEAVNQVITHIRTFCLGGYEQFSFNNGEEW  
MITQMLFKKK

>TCONMT1

MAVTKREKVEAILKKLELGLIPDGEIRKIRVELERRLEWGYKPTHEQQTAEVVNFQAQSLRKLSIAMEMD  
TLDTEMYEVPISFLKIMFGNTIKGSCCYFKDENTTLDEAEVAMLDLYCERSQIKDGQRVLDLGCQGALT  
MHVARKYKNCYVTGITNSVSQKEYIEEQCRINNLPNVEVILADITTHETEDKFDRILVIELIEHMKNYEL  
LLRKFSQLTPDGLFIEHICHKTLAYQYDPVDEDDWFTEYVFPSTMIIVPSANFLLYFQDDVTVVNHWT  
LSGMNYSRTHEAWLKNIDANAEEAVKEIMVSFTGSEEAQVQMNWYWRGFNLSGMELYKYKNGEEMACHIL  
FKK

>TCONMT2

MAPGANKGEIAADLRKKMDMGLIPDEEIRRVIKMELGKRLQWGYKPTYQEQTALVDFAHSLRKMSMAIE  
IDALDSKMYEVPISFYKFTSGSMIKQSCCYFKDDFMTLDEAEIAMLDLYCERAQIQDGEKVLDLGCAGAGA  
LVFYVAQKYSNCEVTGVTNSVSQKEFIEEQCRNNNISNVKIILADVTTTHETDKKFDRIMAIGLIEHMKNY  
ELFIRKISQWMTPNGLLFIHYCHKVIPYHYEPLDEDDWLTEYIFSVGTLTFPSANLFLYFQDDVSVVSH  
WIVNGKHPSTRHEEWLKKIDANVGTMKIEMTRFTGSDEAMKQVNYWRALNLFGIELFKYNNNGEEMVSH  
LLFKKK

>TCONMT3

MEDNNLLQEEMNVVELLQRPELGLVPDEKIRKLRQLQKRLKWGYKPTHEAQLSHLFQFIHSLPSLNM  
ESEDENPKSWLYETPTSFLQLLYGDCIKESDYYKEDATLEEAVINMLELYCERARITEGLSVLDLGC  
YGALTLHVAQKYKCKVTGVTSSISQKQYIMEKCKKLNLTNVEIILADVATIEIEAASYDRIFALGIFEH  
VNDYKFLFLGKLSKWMKQDGLLFVEYLCHKTFPYQNKPLDKGDKWYNEYVFPSSGLIIPSASFILYFQNDV  
SVVRQWTQGGQHSARTFEELLKRIDGNIDKIKEIFIESYGSKEDAVRFINYWRVFLITGVEMFSYNDGEE  
WMGAHFLFKKKFIMQE

>TFLCNMT

MAVEGKQVAPKKAIIIVELLKKLELGLVPDDEIKKIRIQLGRRLQWGCKSTYEEQIAQLVNLTHSLRQMK  
IATEVETLDDQMYEVPIDFLKIMNGSNLKGSCCYFKNDSTTLDEAEIAMLELYCERAQIKDGHSVLDLGC  
GQGALTYVAQKYKNSRVTAVTNSVSQKEFIEEESRKRNLNVEVLLADITTHKMPDITYDRILVVELFEH  
MKNYELLLRKIKEWMAKDGLLFVEHICHKTFAYHYEPIDEDDWFTEYVFPAGTMIIPSASFLLYFQDDVS  
VVNHWTLSGKHFSRTNEEWLKRLDANVELIKPMFVTITGQCRQEAMKLINYWRGFCLSGMEMFGYNNGEE  
WMASHVLFKK

>TFLNMT1

MGSNEAQVKKESIGEIMGKLMQGEIGDEELSKRIKEIFGKRLQWGYKPTHQQALFNLDLFIKSLKEMDMS  
GEIDTMNEETYELPSAFLEAAFGKTIKQSGCYFKDETTTIDEAEAEASHELYCERAQIKDGQTVLDIGCGQ  
GGLVLHIAQKYKNCHVTGLTNSKAQKNYILMQAEKLQLSNVDVILADVTKHESDKTYDRILVIETIEHMK  
NIQLFMKKLSTWMTEDSLLFVDHICHKTFSSHFEAIDEDDWSGFIFPKGCVTILSASALLYFQDDVTIL  
DHWVNGMHMARSVDAWRKKLDKNMELAREILLPGLGSKEAVNGVITHIRTFMGGYEQFSYNNGEEMI  
SHVLFKK

>TFLNMT2

MIVGGKQELFKKLELGLIPNDEVKLMRIQLARRLQWGYKSTYEEQIAQVLDLTHSLRHMNIAMEVDTL  
SNMYEVLDFLIMNGSALKMSSCYFKDDSTTLDEAEIAMMDLHCERAQIKDGHSVLDLGCGHGSLTFYV  
AQYKKSHTAVTNSVSQKEYIEEARRRNLNVEVLLADIATHEMADTYDRILVVGLFEHMKNYGLLLK

KISEWMAKDGLL FVQHVCHKTFAFHCEPIDEDDWLSEYAFPAGTMIIPSASFLLYFQDDASVNVHWTLSG  
KHFSRTTEEWLKRDLANVKVIIPMFATITGSEEEAVKLLNYWRGLCFFGVELYGYNNGEEMESHVLFKK  
K

>TFLPAVNMT

METKQTKKEAVANLIKRIEHGEVSDEEIRGMMKIQVQKRLKWGYKPTHEQQLAQLVTFAQSLKGMEMAE  
VDTLDAELYEIPLPFLHIMCGKTLKFSPTYFKDESTTLDSEVYMMDLYCERAQIKDQGSILDLGCGHGS  
LTLHVAQKYRGCKVTGITNSVSQKEFIMDQCKKLDLSNVEIILEDVTKFETEITYDRIFAVALIEHMKNY  
ELFLKKVSTWIAQYGLL FVEHHCHKVFAYQYEPLDEDDWYTEYIFPSGTLVMSSSSILLYFQEDVSVVNH  
WTLGKHPSLGFKQWLKRLDDNIDEVKEIFESFYGSKEKAMKFIYWRVFCIAHSQMYSTNNGEEMLSQ  
VLFKKK

>XSINMT1

MLKKLELGLVPYDDIKQLIRSELARRLQWGYKPTYEEQIAEIQNLTHSLRQMKIATEVDTLDSQLYEIPI  
EFLKIMNGSNLKGSCCYFKEDSTTLDDEAEIAML DLYCERAQIQDQGSVLDL GCGQGALTLHVAQKYKNCR  
VTAVTNSVSQKEYIEEESRRRNL LNVEVT LGDITTHEMAETYDRILVIELFEHMKNYELLRLKISEWIAK  
DGLLFLEHICHKTFAHYHEPLDDDDWFTEYVFPAGTMIIPSASFLLYFQDDVSVVNHWTLSGKHFSRTNE  
EWLKRDLANLDVIKPMFETLMGNEEEAVKLINYWRGFCLSGMEMFGYNNNGEEMASHVLFKKK

NOS

>ATHBEN1

MVREEQEEDDGGGERKLLVADETVPSSLDETGLVCVTGGSGFVASWLIMRLLQRGYSVRATVRTNSEGK  
KDISYLTEL PFAERLQIF TADLNPEPESFKPAIEGCKAVFHVAHPMDPNSNETEETVTKRTVQGLMGILK  
SCLDAKTVKRFFYTSSAVTVFYSGGNGGGGGEVDES VWS DVEVFRNQKEKRVSSSYVSKMAAETAALF  
GGKNGLEVVT LVIPLVVGPFISSLPSSVFISLAMLFGNYKEYLFDTYNMVHIDDVARAMIFLLEKPVA  
KGRYICSSVEMKIDEVFEFLSTKFPQFQLPSIDLNKYKVEKRMGLSSKLLKSAGFEFKYGAEEIFSGAIR  
SCQARGFL

>PSONOS

MHGQKNISERYQKFKEMEGTGKIVCVTGGAGYLASWLIMRLLERGYSVRTTVRSDPKFREDVSHLKALPE  
ATEKLQIFEADLENPEPESFDDAINGCVGVFLVAQGMNFAEYTTLEKI IKTCEVGLRILQ SCLKSKTVKKV  
VYTSSADAAMMISNLKAVKEIDETI WSEVDNFISKPEQVIPGLPSYVVS KVLTERACLK FSEEHGLDVVT  
ILPPLVVGPFITPHPPSVSIALSIISGDVSMMLGVRL ENAVHIDDVALAHIFVFECEKAKGRHICSSVD  
FPMHDLPKFISENYPEFNVPD LLLKDIEEQEPVHLSSDKLLSMGFQFKYDFAEIFGDAIRCAKEKGFL

>AMENOS1

MEGEKIVCVTGGAGYLASWL IKRLLQHGYTVRRTTVRSDPQFKEDISHLKS LPEASKNLQVY EADLDKPK  
SFDDVINGCIGVFHVAHPIDFEGNKMSQDKAIKISIEGTLGILKACLKSKTESRTAVKR VVYTSSVAAV  
FISNKKDVEEINENI WTEVETLKKNEFTRNGYLISKTLTERSALKFAEEHDLDLV TLLPSMIVGPFLTSN  
LPFSLTISQALVLDNKENCKILKNLNNAVHIDDVASAQIYLFECPEAKGRHICSSVDITIHDI AKLMSIK  
YPELQLPTDLLMEIEEEKPVHISSKLLNLGFKFKYGFEDMYSDAIQCCKDKGFL

>AMENOS2

MAEYCVTGGTGFIASYIVKALLEKGHKVRATVRDPDNEKVGYLWEMPGAKERLKLVKADLMVDGSFDDA  
VNGVDGVFHTASPVLVPYDNDVQATLIDPTIKGTRNVLKSCSKASSV KR VVYTSSCSAVRYRYDVQVSP  
LNESHWSDPQYCKNHNLWYAYAKTLAEEEA WKIAKESGIDL VVVNPSFVVGPLIAPQPTSTLLLILGIVK  
GLRGEYPNLTVGFVHIDDVVA AHILAMEETKAAGRLICSSVAHFSEIIGMLKSKYPSYPYENKCGDQKG  
DNNPHSMSSNKIQQLGLPPLKNLNEMFEDCIKSFQNGFL

>BTHNOS1

MENGGEKGSVCVTGGAGYLASWLIMRLL ENGYSVRATARLDPKFNE DVTHLKA FPHASEKLQIFDADLNK  
PDSFNDVIEGCVGVFHVAHPIDLEGRPEASVTKTAVD GALGILKACLQAKTVKKVYSSSMAAAVISKL  
NVQEIDESQWTDVDFCRTLDVPGISYVISKVTERESIKFAKEHGLQLVTMLPALIVGPFSSPRIPESVA  
IALSLFNGDPEKPLPAWNTNLVH VDDVAAQIFLFESPKAEGRYVCCSTNTTVPELAKFITGKYPELKVR  
PELLSDVGS ENIVRLSSNKLLGLGF EFKHGLEGIFDGAIQCCKEKNLL

>BTHN0S2

MDVKGKVCVTGASGYMASWLKRLLLSGYHVCVTVREPGNSKKVAHLWQLEGAKERLQLLKADLMEDGSF  
DDAVMGCHGVFHTATPVLTPNMVKS DPKAKILAPAIKGT LNVLRSCCKNPYLKRVVLTSSSTAIRVRDEV  
DPNIPLDEMSWSSVERCQRLQIYWALSKVLAEKAAWEFAEEEGIDLTVLPSFIIIGPSLPLDLSLTASDI  
LGLLNGVSRFTQLGRMGYVHIDDVALCHILVYEESQAQGRYLCSSVVLNNDLASFLALRYPSLPIPKR  
FEQLDRPSFDFNTSKLKSLGFNFKGIEEMFDDCVASLKEQGHISQT

>BTHN0S3

MPEFCVTGGTGFI AAYLVKALLEKGYNVRATVRDPEDVEKVKFLWEMNGAKERLKLVKADLMVDGSFDDA  
IQGVDGVFHAASPVLPQDDHIQETLIDPIIKGTINVLSSCSKSRTVKRVVLTSSCSSIRYHYDVQNVSP  
LNETHWSDPEYCKHYNLWYAYAKTLGEKEAWRLAEEKGINLVVINPSFVVGPLIAPQPTSTLLMILRIIK  
GKLGEYPNTALGFVHIDDVSAHMLAMEESEASGRFICSSKVAHWSDIIKMLKAKYPSYPIETKCAKKKG  
DDKLHSMDSKIEQLGLRAFKTLPQMFDDCIKSFQDKELL

>CCHN0S1

MEGGGEKEKGTVCVTGGAGFLASWIIIMRLLQHGYTVRRTFRSDPEFKEDVSHLNALPGASEKLEIFEADL  
GKPGSFTEAINGCIGVFHVAHPNDFTGKTTQDQMVKLSVEGTLGILKACLDSKTVKRVVYTSSIAAAGLM  
NDAKDVKEMTEQIWTEVDAFRTLNI PGISYAVSKLTERAAIEFAEENGLDLVTLLPSMVVGPFGMSNLP  
TSVSLGSLVFGDEELLKAIKPCSSVHVDDVASAEIFLFECPEAKGRYICSAAGENTIHDLVKFLTVKYP  
ELQLHTHLLKEIGEAKPGHVSSKKLMSMGFKFKYGFEEYDEAIKCKKAKGLI

>CCHN0S2

MGVQRERGI VCVTGGAGFLASWIIKRLLERGYSVRTTIQSNPDFKEDVSHITSLPGASKKLQIYEADLGK  
PDSFSEAINGCIGVFHVAHPDFTGKTSQEEMIRISVEGTLGILRSCLDSKTVKRVIIYTSSTVAAGLGTS  
IEDTKVINEQMWTNVDFAKSTLNAPGISYAVSKLTERAAIDFAHERGLDLVTLLPSMIVGPFGLSYLPM  
SVSFALSLIFGNEELLKHKMPTSVDIDDVASAQIFLFESSEAKGRYICSAEKTIHEVARFLQKKYPEL  
QMQTEILKEIEEEEPVHTSSKKL TSLGFNFKYGFEEYDNTIKCKKQKGLL

>CCHN0S3

MGVQLEGGIVCVTGGAGFLASWIIKRLLEQGYSVRTTIQSDPEFKEDVSHITSLPGALEKLIKIFEADLGK  
PDSFSEAIDGCIGVFHVAHPIDLSGKTSQEQMIKLSVEGTLGILKSCLDSKTVKRVIIYTSSTLAAGLGTS  
FEDTKEINEQMWSNIDALINSTDNAPGTSYAISKLTERAAIDFAEEHGLDLVTILPSMIVGPFICPNLP  
NSIAYALS FVFGNEELLKYLTPTSVVHVDDVASAQIFLLECSEAKGRYICSVGEKTIHEVTKFVQTKYPE  
LKVQTQVLKEIEDEQPVHTSSKKLISMGFKFKYGLEELYDETIQCCKEKGFL

>CCHN0S4

MGGQREREIICVTGGAGFLASWIIKRLLEHGYSVRTTVQSNPEFKEDVSHITSLPRASKKLKIYEADLEK  
PDSFFDAINGCTGVFHVVAHPDFTGKTSQEQMIKISVDGTLGILKSCLDSKTVKRVIIYTSSTVAAGLGLS  
INDTEAINEQMWTVDVDTFKNTLNAPGISYAVSKLTERAAIDFAEHGLDLITLLPSMIVGPFGLSNLPM  
SVSFALSLIFGNEELLKHKMPTSVDIDDVASAQIFLFECSEAKGRYICSNGEKTIHEVARFLQKKYPKL  
KIQTEILKEIEEEEPVHTSSKLLSLGFNFKYGFEEYDETIKCCEENGFL

>CCHN0S5

MGATVIDQENTDDQEMVMRGPVVVTGAAGYIGSWLVMRLLQHGYTVRATVRDPTNVGKTKHLVELPGAK  
ERLTIWKADMDEGSFDDVVRGCTCFFHLATPMDFESNDPENEVIKPAINGVLNVMRSCKKSTTLKRVVF  
TTSAGTVNVEEVQKPSYDET NWSIDIDFCRRTQMTGWMYFVSKTLAEKAAWDFAKENNM DLITIIIPPLVVG  
PFIMNSMPPSMITALALITGNEAHYSILKQIQLIHLDDL CNAHIFLYEHPKAEGRYICSSADPTIYELAK  
MLKEKYPEYNIPTKFE GIDESIKRVHFSKKLTDLGFQFKYTMEDMFDGAIQTCREKNLLPLQS

>CCHN0S6

MSITRKKTVCVTGGTGYIAGVLIKLLLEKGYAVNTTVRNPDEKKISPLLKLQGYNDLKIFKADLTIEG  
SFDEAIACCHFV FHVATPIHVHSEDPENDMIKPAVQGT LNVLNSVTKAETVKRVVLTSSATTL SINKLNG  
VGYVIDEKSWTDVEFLTSEKPPNWGYAAMKTLVEKAAWKFAEENKIDLITIIILPLVTGQSLTPEHEPPSM  
PFAMALLTGNNDLINVMKDLQMLLGSVAMIHLEDAVECHI FLAENESAYGRYNCCPINTGLVELGKFFEN  
RYPQYNVHTDFGDFPAQAKLSISSEKLINAGFKFQHIGLEEIYDESVEYYIALGLLQK

>CMAN0S1

MEGEKGTVCVTGGAGFLASWIIIMRLLQYGYSVRTTIRSDPKFKEDISHLKARPKAQEKLQIFEADLEKPE

SFDEAIDGCVGFHVAHPIDFEGKISQDKMIKTSVEGTIGILKSCLKYKTVKRVVYTSSMGAAMFVSNIL  
DVKEVDENMWTEVDNFKNIPLPGVPYAMSKTITERAAIEFAEEHGLDLVTLPLGMIVGPFLLGNLPLISLS  
LALSMVFGNDEYTKIMRQTNVVYIDDIACAQIFLLECPNAKGRHICSAIDITIHVAKFISFKFPELQLP  
ISLLKEIQEEKPIHVSSEKLLSLGFKFKYGFEDMYDGAIKCCKEKGFLR

>CMANOS2

MEGGSDEKKGTVCVTGGAGYIGSWLIMRLLERGYSVRATVRLDPGLNRDISHLTNLPGASDKLQIFNADL  
KNPQSFDTAIEGCIGVFLVAYPGNMDQIEIDDVANEMLEEVTELLRACLKSKTVKRVVYTSSAAAVLVN  
DKGLMEMDESSWSDVEFCRNVKLRGSSYIITKTLEQAALKFAEENGLDLVSIIPPMVVGPFICPHLPDS  
VSMALSIILGNRHPYFAVMQMVHIDDIVSGHIFLFECPNKGRYICSSMETSVDHIAKFFTTTHYPEFELP  
MNLISEMKEEKPIHLSPKKLLSLGFKFKYDFKDMFDGAIQSCCKEKGFL

>CMANOS3

MAEYCVTGGTGFIASLVKALLEKGRVRATVRDPENVEKVGFLWEFTGAKERLKLVKADLMMEGSFDDA  
VNGVDGVFHTASPVNVPYDNDVQATLIDPSIKGTMMNLKSCAKASSIKRVVLTSSCSAVRYRYDVQVSP  
LNESHWSDEYCKSYNLWYPYSKTLAEHAWKWAKESGIDLVVVNPSFVVGPIIAPYPTSTLLMILGIIK  
GMQGEYPNFRLLGFVHIDDVVAHILAMEESKASGRLICSSVAHFSEIIEMLKSKYPSYPFENKCCDRKG  
DDNPHSMDTSKIRQLGLPAFKTIPEMFEDCVKSFQEKGF

>ECANOS1

MEGEKKVVCVTGGAGYLASCLIMKLIQRGYVVRATIRSDPKFNEDVSHLKAIPGAQEKLEIFDADLEDPE  
SFDNIMEGCVGFHVAQPIAFGGSKKEILEKIIKTSLEGTGLILKACLKSKTVKVVYTSSKAAALDFKNE  
AKEIDENTWTDVETLRKNEVGDGWYPISKTLSENAALDFAEHGLDLVTILPSMIVGGFLSSTLPLALRL  
SLALVLGTEVECRLLAQAGNVVHIEDVVAHIFLFRPEAKGRYICSSNDITIHVAKFISVKYPELKL  
TELLEFGKEKAIHYSSKLLDLGFKFKYGFEDMYTDAIECCKEKGFL

>GFLNOS1

MEGGGGEKGTVCVTGGAGFLASWLKRLQLQHGYSVRTTVRSDPKFKEDITHLQVLPQAQEKLEIFEADLE  
KPDSFDNAIDGCVGFHVAHPIDFEGKISQDTMIKTSVEGTGLILKSCLKAKTVKRVVYTSSMGAAMFIR  
NIKDVKEIDESMWTEVDIFKHFEGYGMYSYAVSKTLTERAAIEFAEEHGLDLVTILPGMVVGGPFDGPNLPV  
SLSMALALILGNEELAKLMRQANVVHIDDIASGQIFLMCEPEAKGRHICSAIDITIHVAKLISIKFPEI  
QLPIDLLKEIEEEKPIHVSDDKLLSLGFKFKHGFEDMYEGAIRCCCKEKGFL

>GFLNOS2

MHIYKNEPSRYTSSQYKGERRMEGEKIVCVTGGAGHLASWLIMRLLQHGYSVRTTVRSDPKFKEDISH  
LKSLPEAAEKLEVFADLEKPESEFSEAINGCIGVFHVAHPMEYEQKVSQETIIKISVEGTGLILKSCLKS  
KTVKRVVYTSSIAAAISMSNDIKEINENVWTEVDIVKNLEGPTVSYAVSKTLTERAAIEFAEEHGLDVVT  
ILPSIIVGPSISNNLPVSTALALSSILDQEEYKTLKAPKPPAAVHIDDIVSAEIFLFESPKAKGRYICS  
TVDITARDVAKFIATKYPELLLLSTDLSKEFKEEEEEKPVHISSDKLLSIGFKFKYGFEDMYDDAIQYCKE  
KGFL

>GFLNOS3

MEGGRDDEKIVCVTGGTGYIGSWLIMRLLERGYTVRATVRLDPGHNRDISHLTSLPGALEKLQIFNADL  
QNPQSFNAIDGCVGFVFLVAYPINLDQIEVDDAANGKIVLGTLELLKACLKSKTVKRVVYTSSAATLMVN  
DKGLMELDESSWSDVEFCRTVKAYGSSYIIPKTLIEQAALKFSEENGLDLVSIIPPMVVGPFICSHLPGS  
ISMAMALILGNRYPRVPITQMVHIDDIVSGHIFLFECPEAKGRYICSSLETSIHVDVAKFFTIHYPEFEMP  
MNLISEMKEKQPFHLSPKKLLSLGFKFKYGLKDMFDGAIQSCREKGYL

>GFLNOS4

MGSLSTTSEDQKMMSKGPVVVTGAAGYCGSWLVMRLLQQGYTVRATVRDPTKIEKTRHLLDLPGAEEERLT  
IWKADLEDEGSFDEVIDGSIYVFLATPMDFESIDPENEVIKPTIHGVLNVMKSCCKAKTVKRVVFTTSA  
GTVNVEEHQKPVYDETSWSDIEFCRRVKMTGWMYFVSKSLAEQAADFVAKKNNIDLISVIPTLVVGGPFIM  
NSMPPSMLTALALVTGNTAHYSILKQIQLVHLDLCAHIFLAHPNAKGRYICSSSEDPTIFQLANMLKD  
RYPEFDIPTKFEGIDESIKPVHFSSKLLKDLGFQFQYTMEDMYDGAIQSCREKCLFPPGLEKDRQNEKKE  
VTSKVVKEENEKITSVHAVSHAKPAIMA

>HCANOS1

MEEEEKIVCVTGGAGCVASWLIMRLLQHGYSVRATVRSDDPKFKEDTSHLLNLPEAPEKLQIFDADLENPE

SFEAAINGCIGVFHLSHPMDFEGKIPLDTLIKTSIEGTLGILKACLKSKTVKRVVYTSSISAAMCISNMN  
ETGQIDESMWSLDMVRSHNFPVSYIVSKTLTESAVLEFSKEHGLDVVTILPSAIAGPFLTSYLPVAFS  
QSLPLIFGKEVQLINMTNTNLVHIDDVASAQIFLFECPAIEGRHICSTIDLSIHGLAKLLSNKYPELELQ  
IPTDDLKMEETKPLHLSSKLLNLGFKFKYDLEEMFDGTIQCCKEKGFL

>HCAN0S2

MVAEGDSVCVTGAAGFIGSWLVMRLLERGYMKATVRDPDNIKKVKHLLDLPNAKTSLTLWKADLVDEGS  
FDDAIKGCTGVFHVATPMDFESKDPENEVIKPTIEGMLNVMRSCVKAKTVRRLVFTSSAGTVNVHQHPQQ  
PKYDENCWTDVEFCRNKMTGWMYFVSKTLAEKAAWEFAKDNNDLDFISIIPTLVVGPFLMSSMPPSLITA  
LSPITGNEAHYSILKQIQLVHLDDLNAHIYLFHPEANGRYICSSYDSTIIDVANVLRQKFPEYNVFNK  
FKDV DENLKAFAVSSKRLIDLGFYKYKSKEDMFVEAIVSCREKGLLPLCSETQVNDKSMCEKREARSEG  
GSD

>HCAN0S3

MERVCVTGAGGFQASWLVNLLL SKGYMVHGTVRNPDDEKNAHLKELEKASENLKLFKADLLDYDSLFAAI  
NGCSGVFHVASPVPSGAVPNPEVELIEPAVTGTSNVLKACSMKIKKVVYVSSIAAVMLNPNWPKDKLMD  
ESCWSDFCKT TENWYCLSKTEAESQALDYAKKSGLEVTVCASIIIGPMLQSKMNASSLLLLRMLKDG  
LETLDNKIRMFVDVRHVAEALLLVYKKEAEGRYICSAFTLTMKDLNEKLTMYPNYNYPKQIVGVDEAW  
DISSEKLLNLGWKYRPLEDTLIDSIKNYQEKGLLHKV

>JDIN0S1

MEGKTGTMCVTGGAGYLGSWLVMKLLKRGYSVRATVRLDPEHKKDLSHLKNLPGASEHLKFFNADLNKPD  
SFDAAIEGCDGVFVHAHPLDFQNEADPARISMAVEGTLGILKACVNSKTVKRVVYTSSVAAVLNTTGL  
MEMDENSWDLELVETIKAPGSSYIVPKTLAEQAAIKFAQEHGLDLITVAPSLIVGPFICPHFPTSVFLA  
LAVLMGKTDKFQYISITSMVHIEDIVA AHIFLLECPNAKGRFICSALDTTIHDLAKFLSSKYEDFEMPID  
SLKEIEERKPLHLSSKLLDLGFTYKYGLDEIYDGAIQCCKEKGLM

>JDIN0S2

MPKKA AVDQKMDFKGKVCVTGASGYLASWLVKRLLLSGYHVKGTVRDPGNSKLAHLWQLDGAKELELV  
KADLMEDGSFDDAIMGCCGVFHTASPVLPESDPKAEILDPAVNGTLNLRSCRNPGPKRVILTSSSAA  
VRVRDDFDPNIPLEDETSWSSVEICERFQIYWALSKILAEKAAWEFAKENGIDLVTILPSFLIGPSLPHDL  
CSTASDV LGLLTGGPNKFSFHGRMGYIHIDDVALCHILLFEEAKAHGRYLCSSFVMDNNDLASFLAQRYP  
YLPITKRFEPLDRPCYEFNTSKMKSLGFKFKGIEEMFDDCVASLKEQGYILQK

>JDIN0S3

MSIGAGKVVCVTGASGYIASWLVKLLL ERGYTVKASVRDPNDYNKTVHLRALSRANERLQLFKANLLEEG  
SFHSVIDGCEGVFHTASPFHNVTDPAELIDPAVNGTLNVLGSCAKIPTVKRVVVTSSAAAVVYNGKPR  
TPEVVVDETWFSDAELCKNLKLWYVVSKT LAEESA WKFAEKNGIDMVAINPAMVIGPLLQPTLNTSAEAI  
LNI IKGETFPNRTL GWVHVKD VANAHILAFENSSATGRYCLFESVAHYSELVRILRELYPGLKLEKSE  
DDKPFAPTYQVSREKAKGLGIDFIPLEIGLKETVESLKEKKFVSFEV

>MCAN0S1

MSSGAKKVVCVTGGSGYIASWLVKLLL ERGYTVKASVRDPNDPKKIGHLLALPGANERLKLKADLLEEG  
SFDSVIDGCEGVFHTASPFHAVTDPQTELIAPAVKGTNLVLSCAKTPSVKRVVVTSSMAAVLYYGKPR  
TPEVVVDETWYSDFEFCESKLWYVVSKT LAEEAAWKFAKENGDLIVTINPAMVIGSLLQPTLNTSAAAV  
LNLINGSETFPNYTFAWVHVKD VATAHILAFETPSASGRYCLVERVAHYSDVVKVLHDLYPNLSLPQKCA  
DDKPFVPTYQVSI EKAKGLGIDFIPMEVSLKETVEGLKEKNMISF

>MCAN0S2

MEGANERVCVTGAGGFVASWLVKLLL SKGYTVHGTVRDPRDKKNAHMLKLEGEYKQLQFQADLMNYSSL  
CAAITGCNGVFHVATPVPPGSDAVLEAELVEPAIVGTNLV LKACSEAKVKRVVVVSSAAVEMNPNWPKD  
QVMDETCWSDKEYCKQTKNWFYFVSKTVAENEAL EYSKGTGLDVTVCP SIVIGPMLQSTVNGSSLVLKI  
LKDGIDRVENKVRMLVDVREVAEALLTYKKPEAQGRYLCVSYMIRMKDLVEKLRVYPNYNYPKNFTEV  
EEEDKLSSAKLQSLGWKFRPLEETLADSVKSYQEAGILDKD

>NDON0S1

MEGGDKGTVCVTGGAGFLASWLITRLLRHGYSVRATVRSDPKFKEDTTHLMNLPEAQEKLAIFDADLEKP  
GTFEPVVEGCIGVFHVAHPMDMEGKTPQETITKISVEGTLGLLNACLKSKTVKRVVYTSSTAAMCVSNL



KELQEIDENMWSDVEMLKGLSLPGLSYSISKTLTERAAIEFGAKNGLDVVTLTPAAIVGPFHTPNIPIGV  
ALALALVFGNELACQLAKQLNIVHIDDVASAQIFLLECPKAVGRHICSSADTTIHGLAKFFSARYPEFQM  
PIDLLSKMEEKPIHLSKKLLDLGFKFNNGIEKMYDGAIESCKQKGF

>NDONOS2

MEMEGEKSGSRVVCVTGGGGYIASWLIMRLLQLGYSVRATARLDPKLLKDLSHLTNLPRASQNLKIFNA  
DLNQPDSFTAIEGCDGLFHVAHPLDLEDCEVDDAKVNMLVEGTLGVLKACVKSKTVKRVVYTSVATVV  
ANKTGLMEMDESIWSDIDFVKAYKFPGSSYVAAKTLSEQAAIKFAEEHGLELVTVISSMVAGPFICPSLP  
SSVCMALALIMGKSDQYINLVKANLVHIDDIVAAHIFLLECPKAKGRYICSAIDTTIHAKYLSFKYPE  
FEMPMSLKGPEMQPIHVSSKKLMDLGFKFYGLDEIFDGAIQSCKEKGF

>NSANOS1

MADEEQPSTKLKACVIGGTGYLASFLIKHLLQKGYHVNSTAKDPGNPETISHLLELQNLGELKIFRADLT  
DEGSFDEAVSGCLVVFHVAATPVHFDSEDPENDMIKPAIQGTLNVLKACTKAQTVKRVTSSAAVSVINN  
INNTDPMDEEWTDVQYLSSEKPFAGYVSKALAEKAAWYAENNEMDLITVIPSVIAGPSLTPNVPN  
SVSLAMSLTGNESLINGLKMQITSGSISLLHIEDVVRHIFVAKQSATGRYICSAVSTSVPELAKFL  
SKRYPQYVVLSEACSCVVS

>NSANOS2

MSSSTTEGAGKTVCVTGGSGYIASWLIKLLLQRGYTVKATVRDPNDPRQTMHLRELCGAGERLSLKFAD  
LLSEGVDIVNDCDGVFHTASPCYFEAKDPQAEIVEPAVKGTNLVLRSCSKSPSVKRIVTSSIAAVLN  
NGKLRTPDVVDETWFSDPEVCKELKLWYPLSKTLAEESAWKFAKDHGIDMVSINPAMVIGPLLQPTLNS  
SSSIILNLINGAKTYTNAAYGLVDVRDVANAHILAFEVPSATGRICLAEKVCHFSEMVEILHELYPDIQL  
PTKATDEPFVQPYQLCTEKARSLGINFTPIGVSLKETVESLKAKKFVNL

>NSANOS3

MPEYCVTGGTGFIYAAYIVKELLHKGYNVRATVRDPGDAEKVGFLEMDGAKERLKLKADLLEDGSFDDA  
VQVDGVFHTASPVLPYDENIQETLIDPCIKGTNVNLSKSCASSVSRVLTSSCSSIRYCDEAQKAPL  
NESHWSDEYCKSYNLWYAYAKTLGEKEAWRLSKELGIDLVVVNPSYVVGPLIAPQPTSTLLMILGIITG  
VTDEYPNTMIGFVHIDDVVRHILAMEESRAAGRLICSSSVVHWSEIIKMLKDKYPSYMPPTKCSDKKGD  
DTPHSMDSKINELGLPAFKTVPQMFDDCIKSFQEKGF

>SCANOS1

MEMEGEKSGSRVVCVTGGGGYIASWLIMRLLQLGYSVRATARLDPKLLKDLSHLTNLPRASQNLKIFNA  
DLNQPDSFTAIEGCDGLFHVAHPLDLEDCEVDDAKVNMLVEGTLGVLKACVKSKTVKRVVYTSVATVV  
ANKTGLMEMDESIWSDIDFVKAYKFPGSSYVAAKTLSEQAAIKFAEEHGLELVTVISSMVAGPFICPSLP  
SSVCMALALIMGKSDQYINLVKANLVHIDDIVAAHIFLLECPKAKGRYICSAIETTIIHELAKYLSIKYPE  
FEMPMSLKGPEMQPIHVSSKKLMDLGFKFLMVMKYLMEQFKVAKKKGLCRCLLVLELP

>SCANOS2

MGSTTHDQDDQMMVMIKGPVVVTGAAGYCGSWLVMRLLQQGYTVRATVRDPTKIEKTKHLLDIPGAKERL  
TIWKADLEDEGSFDEVIIEGSIYVFLATPMDFESTDPENEVIKPTIDGVLNVMKSCKAKTVKRVIPTTS  
AGTINVEKQKPIYDETSWSDLEFCRQTKMTGWMYFVSKTLAEQAADF AKENNIHFISVIPTLVVGPFI  
TNNMPPSMLTALALITRNEAHYSILKQIQFVHLLDLCNAHIFLAEHPKAEGRYICSEDPTIFQLANMLS  
ARYPEFDIPTKFEGIDESIKPVHFSSKLLKDLGFQFKYTMEDMFDGAIQSCREKCLFPSDLEKNNQHFY  
QKEIIDLAAAKEKIQISSVPAPEKPTIMA

>SCANOS3

MDWKVIGKKTVCVTGGTGYVASLLIKNLEKGTAVNTTARNPEDQKKVAHLLILQADHSDLKIFRADLT  
DEGSFDTAIAGCDIVFHVATPVNFNSQDPENEMINPAIHGTNLVNLNACVKSKTVKRVTSSAAVSVINN  
QNGTGFVMDGCVTDVEFLASAKPPIWGYVSKTQAEKAAWFAEENKIDLITVIPSMLGPSLTLAVPS  
SIFLGMSLLTGNELINTLKGMLSGSISITHVEDVNAHIFLAEKESASGRYICCNISSSLPELAKLL  
SNRYPQYKVPDFRDFPTKAKLSLSEKLINEGFSFKYGIEEYDQTMEEYKSVLELQK

>SCANOS4

MAEYCVTGGTGFIYAAYIVKALLEKGRVVRATVRDPKVEKVGFLWEFTGAKERLKLKADLMVEGSFDE  
AIDGVDGVFHTASPVLPYDIDIQATLIDPSIKGTMNVLRSKSSSLKRVLTSSCSAVRYRYDVQVVS  
PLNESHWSDEYCKSYNLWYPYAKTLAEEQAWKLANESGIDLVVVNPSYVVGPLIAPYPTSTLLMILGII

KGVQSEYPNLAVGFVHIDDVVAHILAMEESKASGRLICSSSSVAHFSEIIEMLKSKYPSYPIVNCNDKK  
GDDIPHSMDTSKIRQLGFPAFKTIPEMFEDCIKSFQEKGFL

>SDINOS1

MGSINIDPTMMKKGPVVVTGATGYCGSWLVMRLQLQEGYIVRATVRDPSKIEKTKHLLGLPGAKERLTLWK  
ADLEDKGSFDEVIEGSIYMFHLATPMDFESTDPENEVIKPTINGVLNVMKSCCKSKTKVSRVIFTTSAGTV  
NVEEHLKPVYDETSWSDVEFCRRIKMTGWMYFVSKTLAEQAAWDFAKENNIHLISVIPTLVVGPFIIMNSM  
PPSMITALALITGNKAHYSILKQIQVLVHLDDLNAHIFVATHPKAEGRYICSSSEDPTIFQLANMIRDRHP  
EFDIPTKFEGIDEAIKPIHFSSKLLKDLGFQFKYTMEDMYDGAIQSCREKCLFPPELEKNKKQYDHQKEV  
LVKEKKISTAVPNAVLQEIEKNIN

>SDINOS2

MAEYCVTGGTGFIAASYLVKALLEKGRVRATVRDPENVEKVGFLWEFTGAKERLKLKADLMMEGSFDDA  
VNGVDGVFHTASPVNVPYDNDVQATLIDPSIKGTMNVLKSCAKASSIKRVVLTSSCSAVRYRYDVQVQVSP  
LNEHWSDEPEYCKSYNLWYPYSKTLAEHAWKWAKESGIDLVVVNPSPFVVGPLIAPYPTSTLLMILGIK  
GMRGEYPNFRLLGFVHIDDVVAHILAMEESKASGRLICSSSSVAHFSEIIEMLKSKYPSYPFENKCCDRKG  
DDNPHSMDTSKIRQLGLPAFKTIPEMFEDCIKSFQEKGFL

>SDINOS3

MAKGTVCVTGASGFLASWLKRLLLSGYHVVGTVRDPGNDTKLAHLWNLQAKERLRLVKAELTEEGSFD  
DAIKGCEGVFHMASPVLGQPTDQDILKPAIDGTLNVLRSCKKNPSLRRVLTSSSSTIRVREKLDPKNP  
LDESSWSSVELCSKLIWYVLSKMAEKAAWFCNENGINLTVSPSFVVGPSLPPALCSTASDILGLLQ  
GETERFYWHGRMGYVHIDDVALCHILVYEREEAEGRYLCSSTVVDNDELVSILSARYPTLPIPKRFEQHE  
RPYYDFNTNKIKSLGFTFKSIPMFDDCITSLVAQGHSIP

OAT

>RSEVS

MAPQMEKVSEELILPSSPTPQSLKCYKISHLDQLLLTCHIPFILFYPNPLDSNLDPAQTSQHLKQSLSKV  
LTHFYPLAGRINVNSSVDCNDGSGVPFVEARVQAQLSQAIQNVVELEKLDQYLPSAAYPGGKIEVNEDVPL  
AVKISFFECGTAIGVNLSHKIADVLSLATFLNAWTATCRGETEIVLPNFDLAARHFPPVDNTPSELVP  
DENVVMKRFVFDKEKIGALRAQASSASEEKNFSRVQLVVAYIWKHVIDVTRAKYGAKNKFVVVQAVNLR  
RMNPLPHYAMGNIATLLFAAVDAEWDKDFDLIGPLRTSLEKTEDDHNHELLKGMTCLYELEPQELLSF  
TSWCRLGFYDLDFGWGKPLSACTTTFPKRNAALLMDTRSGDGEAWLMAEDEMAMPLVELLSLVDSDFS  
K

>AMEOAT1

MSDIMKVEVVSREIIKPLSPTPNHLKTFNLSFLDQLSPPIYVPIILFYPIDCKNDCKSTIESIRGNLKK  
LAHTLTKYYPLAGRIKDGSFVECNDDGVDYVEANVYDINGGISEI IQNPDGDILKLLPFDPYGVGYNT  
KVLISIRINVLEENCGGIVIGICISHKIGDGSSLTTFINDWAAAARKNPSEIQKGPQFDLPSLFPLRDLK  
GYIPPSAGAEMVEEIVTKKFVFEKSKITELKKKGIVNGGNDDDDVKKYPSRVEAVSAFIWRRVIGLDQA  
KKQGGDSNNEAPVTVYGS LHAVNMRSRMPPLPSNSFGNMYTTTMAFSIINNHADEEEKLGHYQLPNLVE  
KVKESIKKIDSEYVKKVQTTDELLNSMKHLATGHQMVLFSFSSWCRFPPIYEADFGWGKPIWVTTSTFPFK  
NVVVFMDDTKSGDGEAWVNMKDDMAAFERDQELLQYVS

>BTHOAT1

MKMKVQVISRESIKPSSPTPPYLKTFNLCFLDQIAPPFYIPIFLFYADNSPNDIENAGLHCRQKRSLSET  
LTSFYPLAGRINGNTSVCNDEGANYVEARVSGLLSEVIVQPNVADVLKMFSPCDEPHFDDADTAHGPKF  
GSKVLLAIQVNVFDCGGIMICVCLSHKISDAYSMSKFINCWAAKTHNCKEEILPISELSSIFPQRDLLGY  
IPSAFIHRGKGKIVTKRFVFDASKIASLRATGANSSHVSYPTRIEAVSALIWRRFMESTRAKNGLLKEYV  
AIHAVNFRRRMDPPLKVEGLENTLGNVFGSTFTASQDLGKKEPHILVSKLRDAISKIDGKYLRRLICGN  
AYLESFLGGLAGVAKGETGLAIFSSWCRFPWYETDFGWGKPTWVSISGFPCRDLIILMDTRTGDGIEAWV  
NMLDEDMAEFEQDEKLLEYVSTTPSA

>CCHOAT1

MEGSSPITTASKAGNKLEMADSKSSSVVEVISKETIKPSIPTPEHLKTIKISLLDQLSPPLYVPIILFYT

AAAATDDDDKEIYENLEYKSNILKKSLSSETLTHFYPLAGRMKDNMVIDCNDEGVDFEARVSGNMSEFMK  
PDAVPQFLPYDVSCNYSNGKIQLGVQVNFDCGGIAIGVCISHKTADASSMSAFINGWASTARTGATES  
PTFDLVHLYPPSCVQIPSENSFTTQVEGEKVVTKRFVFDASKIANLRAKLGDDDDDKKTTITRVQAVTGLI  
WKCAMSKWAHTSSSTSSKLSIANLAVNIRWRMDPPLDQLSYGNLLTLATAASTTEGGSLEELVGQLKVAL  
SKIDAETIKYIQGEGGFMRLLQELLGRVHEMFAKGDEVEVYMFSSWCRFPVYEADFGWGRPTWVSCSSQPY  
KNTVILMDTRSGDIEAWVNLVEDDMTLFQQNQELLEFSYTDI

>CMAOAT1

SFDSTSLFPPSEQLASQVSYPTQDSTSVDKLVSKRFVDAAKITSAREKLQSLMHDKYKCHRPRTRVEVVS  
ALIWKSAVKSAPPGSISTVTHAMNFRKKMDPPLQDASFGNLCVVVTAVLPATTATTTNPATKKVSSTSNE  
EQVALDELSDFVALLRREIDKVKGDGKCEKIIQKFIYGHDAVAKDSVEDKVTALFMTSWCKFGFYEA  
DFGWGTPVWVTTVPLIEPKYKNMFMNDMKCGEGIEVWVNFLEDDMTKFEHHLREILQLF

>CMAOAT2

MIKMDPKIKVVLISNETIKPSSPTPHHLRNFNLSLIDQFSSPIYIPIILFYDQVIDSNIDDDHRSNRLKR  
SLSETLTRFYVAGRINGVNSIDCNDEGVDFETRIQGMDSFMVRPELYNHLLPSHIVSNIFATDAQLA  
VQVNVFDCGGLAICFCMSHKIADASSMTTFINDWAATTRGSMAESVGPIFESASLFPARDILKTSIEPVP  
DTAGVDVVTKRFVFDASMI AALRAKIQGTTVTSVGKYPTRVEAVSGLIWKSTIEMSKVKLESGSSTKPLK  
AMVVHHSVNLKRMDPPLADVSFGNIITLTSAVASSTMIMSQEVELEELVGKLRAAISRNISDYINKML  
GCDDDDDEEFVRLKVSNRFAKEVNDDHVDGEDNTDADSNADDDDDVYWMSSWCRFPVYESDFGWGKPT  
FVCTKQSYKNVILMDTRCGGGIEAWVSLVEDDMAIFERNPNLLQFVSTIN

>CMAOAT3

MVLKVEIISKETIKPSSPTPIHLRSFKLSFLDQITPPIPNILFFYPASDGSFDNVKRSRDLKKSLSSETL  
TYFYPLAGTIGDNITVQCDDNGVQFLETQVNCQLSKVLKHPEAQVMKQFLPDPGMMCNELGKGLQLAIQV  
NMFDCGGMVIGMTVLHKIIDAGSLSTFINAWARTARGETLGRPRFDSASLFPNEVP GTTFLPMKMNP  
SAEKIVTKKFVFDASNIAALRAKASHSEHVKNPTRVESVSALLWKCAWNAKSKSSVANVIVNFRSRIVPP  
LPENSFGNLIGMSTTKITNHEEAELHYLARNLRDAIRKINNDYMKELQNDGSLRSTLEAPHEEFNNDVEVE  
VYTMTSWCRFPFYEVDGFWGKPIWISTVNLVKNGFMLMDTRCGSGIEAWVTLDEQKMAEFESDLDRASQ  
IHFSQSQ

>CMUOAT1

MEVQIISRENISPSTPVDPHRENSLKL SLLDHLATSNYVTIILFYPSGCGVGNHEDHISKRSQDKTSLS  
ETLTHFYVAGRIRDGAAVDCDGGQVEFSEAKAGVRLAEFLKRPNIDDLKLLPCAPYVTNEELPAKALL  
GVQANYFDCGGMALGVCFSHKIADGAAMATFIRFWADAANGSSKNALPNPSFDLPSLFPKDSGDATPSG  
RGGVGEVSNIVTRRFVFKGEKVAALRGTEVEHPTRVEAVSAFIWERAIAATRAKAGERASIAVHAVNLR  
GRMVPPPLPSNAFGNASRPTITKCVFEGSDTRSDRHVLVKHLRDAMRRVDGDYVRKLCQGEEGFMNSIEEI  
QKQFSKGEVAMNFNSWCRFPFYDANFGWGRPIWVSTTKTPGKNLVILIDSKFGDIEAWLNMVEEDLVE  
LEKDEEFLSFSVNT

>CTROAT1

MSTLIKKNLSSSFWFQVVVELGESVAMDQKSSNGNVFELSVKVGEP TLVPPAEDTPKGLYFLSNLDQNI  
IIRTVYCFKSEEKNERAGEVLKDALAKVLVHYYPMAGRLTISSEGKLIHVCTGEGGVFVEAEADCKMED  
IGDITKPDVTLGKLVYDIPGAKNILEMPPLVAQITKFKCGGFVGLCMNHCMFDGLGAMEFVNSWGETA  
RGEPLTVPPFLDRSILKARIPPKIEFTHQEF AEIEDISXTSSLYEEEMLYRSFCFDTQKLEQLKKKAMED  
NVIKCTTFEALSAFVWKARCEALMKPDQIKLLFAVDGRPRFEPPLPKGYSNGNIVLTNSLCNAGEVL  
ENPLSFTVGLVQRAVKMVTDSYMRSAIDYFEVTRARPSLAATLLITTWSRSLSFHITDFGWGEPILSGPVT  
LPEKEVILFLSHGKERKSINVLGLPASSMKIFQELMEI

>ECAOAT1

MAVMMDKLVRVISKEIIPSSSTPSHLSPYKLSLLDQVIYPVYVPVVLFFESNHTNSFESESNYHLLKK  
SLSNVLTRYYP LAGRIKDNIFVECNDLGVDFEAKVNGNITEFRSADLLNQLIPTLDMASRTPLI IQVNM  
FDCGGIAISMCM SHKLF DASSIATF INCWAATARGETEFVIPNFDAHSLFSVRQVSFPVDP TPVELKDGT  
IENKLVAKRFFDAANIASLRARIAKTSNGKYPTRVEAVSALIWKSLMNPEAESMSILNQAVNLRKMDP  
PLTQESFGNIVTLATTTLIPKNSYSLDELVGHLRVSIIHKIDEDYVRKLRGDSGEEFIKWTKEAGLMNED  
GKNMYMMSSWCRFPFYESDFGWGKPVWVTYSVGQALAKNGIVLMDTRDGEIEAWVKLEEKDMTAFECNE

NLLEFAYVTK

>GFLOAT1

MTYAALPYPLRPCPFTPLDQFSSPHYVPIILFYAAAAPLGDCPTEGNQVDDIDHRSNRLKRSLSETLTQF  
YPVAGRIKSSSSVDCNDEGIDYYETRIHGKMSAFMTRPREHHLLPCHIASNILAKDAQLAVQVNVFACG  
GTAISFCMSHKIADASSMTTFINDWAATNRGSKTLSPTFKSAFLFPPREILNTLAVPGPDTHGIDNRTI  
GDVNAKAVVTKRFVFDASMI AALRAKI QNTSTPRVGYFPSRVEAVSALIWKSFMEMSKVKKLKI ESSSLRK  
PVKCMVVHHTVSLRKRMDPLLADRSFGNMITLATAVASPTMLMAKQVDVEELVRQLRAAIS KINGDYIKK  
LQSGGDDDEEFLRLVNESGRFAKKVNNNGDEVTDHNDSDDDHEVYWMGSWCRFPLYESDFGWGKPVVMVSS  
YQSYKNVIMIDTSCGDGIEAWVSLVEDDMAVFERDAQLLEFASTIC

>GFLOAT2

MKMKEVVSREMIKPSPTPHHLRTFNLSFLDQLAPPIYVPLVLFYKSDEYDNDNNSHFPDI IKKSLSAS  
LTRFYPLAGRIQDEGSVDCNDEGV DYLETKVTNGELSQIIQHPEVHVLQQFLPCDSYSTNQSTPVT SKVL  
LAVQVNVFEDCGGIVIGICISHTLADASSLSTFINDWAACARGATDQIMDPCFELPTLFPKVDLMGYNTL  
GSIKKNKQQIVTKRFVFEASKITELKKQSVVETNATNINGDGHRECPTRVEALS AFVWKR FMKLNQAKEE  
ASARVYRVTA VNL RKRMPQLPTNAFGNMYSPTFALLVDAEGKGDHPYPTLIVKIGEAIKRIDGDHVRK  
LQHTDAYFNFYKQ MENAASNQTSNMLHFSSWCRFGIYEADFGWGKPTWAATAPLPFKNVVVFMDTRS  
GDGIEAWVNMTKEDMDEFECDFEFLKFAS

>HCAOAT1

MDQTQQFHLLRVTFQKILGKMTLNVEVISRETIKPSSPTPHHLKNFKLSHLDQYTPPIGVPIILFY SANH  
FEKTKMSDRLKKTLSKLTDFYPLGGKIKDNNSIDCDDSGVEYLETQVKAQLYQFLNCP EADELNQLIPL  
NLNCTGMSSEIQLAIQVNVFECGGIAIAACISHKVADASSLCTFLSNWAANARGANHVFPQFDSAPLFP  
PREVSSLQLSTEGPTHNVVTKRFIFDSSNIAALKAKSANYVENPTRVEAVATFLWRCFMNVASLKP GSIK  
SFMVNI AVNLR SRMPPLPDHSFGNL IMAAMPSSTADSKAELHCLVGLREAIRRYDGDYMKNLQDGDGV  
SMFYDSMRQAIELFAKGEMGYTITSWCRFPFYEIDFGWGKPIWASSLNMVHKNVVILMDTKYGDGIEAL  
VTLDEEDMARFECEEEELLAFTSPKNIAYVQELHDFTNPIKMAYEQEVLASTSPNGMAYEKRS LISLG

>JDI OAT1

MSIQVEIMSRESIKPSTPTPHHLRTFKLGLFDLLAGFDRVSILLFYDNKDTKKIEFS DISRRLKTSLSSET  
LSSFYPIAGRMNGYIAIECNDEGV DYE ARVKAQLEDVIKHRNVDQVLELLSPGDDQEPQLSLKVLLAIQ  
VNLFE CGGIVISVCLSHKISDAYS MITFINSWAAKTSDSNQLIHPISQQLSSLYPPSGLDLNSAPFQSTI  
PNLVTKRFVFDSSNIA SLRAEVINNNSSCVSPTRVELVSALLWRCF MELTRKKNGLFKECAAMHIVDLR  
KRMDGKGL ENALGNLCAPTFTTSRELASENELYVLV GELRDAIRKMDSEFVTKIRRDGEYIQHLEDEYSK  
GISTGKTGLIMFTSWCRFPLYKANFGWGKPVWATGISARND FKNVVALMDTRS GDGIEALVRMAEEDMAE  
FEQDEQLLSFLSSTHCVDC

>MAQOAT1

MIVNIKETTMRPSEPTPKRSLWNSNVDLVVPRMHTPSVYFYRPN GSSNFFDANVLKEALSKALVPFYPM  
GARLKRDEDGRIEIDCDGQGVLFVEAETVSVIDDFGDFAP TLELRQLIPTVDYSGDISSYPLLVLQITHF  
KCGGVSLGVGMQHHVADGASGLHFINTWSDMARGLDLTIPPFI DRTL LRARDPPRPAFEQVEYLPPPAMK  
TPLSTPTDSTVAIFKITREQLNILKAKSKEGGNTINYSSYEMLAGHVRSACKARGLPYDQETKMYIAT  
DGRSRLRPALPPGYFGNVIFTTTPIAVSGDLSAKPLTYAASVIHEALGRMDDEYMRSALDYELQLPD LAA  
LVRGAHSFRCPNIGITSWSRLLPIHDADFGWGRPIFMGPGGIAYEGLAFLLPSPINDGSLSLAISLQSEHM  
KVF EKILYEF

>MCAOAT1

MKKMMKYMKVQVVSKETIKPSSPTPHHLRTYNFSLIDQHIPQLLYIPFILFYSPNIHHKHDDDHHRQLI  
NIQTQSLDRKTSLSSETLTYPLAGRIKND SIICCEDEGV E FVHTKVIDSPLLELVNKAEPENLAQLLP  
RHDHQRNEK PPLLSIQFNAFECGMAIGLWFSHKVADSSSLCTFLHNWASIARGSLSSSTEILCPRFDCAT  
HFPPKQLMSPLQHVKTKEGVSSRRYIFDASMI AALKAKASTTINRNSSSSISPSRVLAVIAFLWRTVIAM  
DREKQLG SIRPLNMGIAVSLRSKME LTPELSFGNLVAIGMTSAFHEQEVVERIGDLFGKFN RDYVKKLQ  
SGEEYLKLMESLGELEEQICRGEAERYGVTSWCRFPFYEVD FGWGKPVWANVA AFEDNFFVLM DTRFGE  
GIEVWVSLGEDDMARFQRQLDRELLVLFNSFSSVGS A

>NDOOAT1



MFYFSLQRGLTQHIKSGNVLVNNNQEDMATMSSAAVEVISKEIIPATPPPYQLTNFNISLFDQYMPPSY  
TPVILFYPAAVADSTGGSKLHDDLGGLLKRSLSQLVHFYPMAGRLKDNMVDVDCNDQGVDFYQVKIKAKM  
CDFMMKPDEFPLSLLLPAADVSVNFVKEAQVIVQVNMFDCCGTAISLCISHKIADACTMSTFTRNWAATT  
NTARLGGAIIPPNTNPLFLPSFDSASLFPNEQLASQSAMPSTVYPTEDSRRRHIVVSKRFVFDVAVKLKSV  
REKLQVLMHDKYRSRKPTRVEVVSALIWKAAMKSAPSGASSTVNHAVNFRKKMDPPLQDVSGNLCQVVA  
ALLPATTPETTVNSDNKTVNSTSNEVQVALDELNDFVAQLRGEIDKVKGDKGCMERMFLNFMNGYVTKDS  
DVEDEVIAFWMTSWCNFLYDADFGWG

>PS00AT1

MATMSSAAVEVISKETIKPRNPTPYQLRNYNMSLLDQYSSLVYVPIILFYPAASDANSTGSKHHDDLHLL  
KRSLSETLVHFYPMAGRMKDNMTVDCNDEGIDFFEVRIKGRMCDFMMKSDAHLSSLLPSEVASTNFVKEA  
QVIVQVNMFDCCGTAICFCISNKIADACTMITFIRSLAGTTNIARRGSSIAAPTTNQNLPVPSFDSTSLFP  
PSEQLASQVSYPTQDSTSVDKLVSKRFVFDAAKITSAREKLQSLMHDKYKCHRPTREVVVSALIWKS  
SAPPGSISTVTHAMNFRKKMDPPLQDASFGNLCVVVAVLPATTATTTNPATKKVSSSTSNEEQVALDELS  
DFVALLRREIDKVKGDKGCKMEKIIQKFIYGHDAVAKDSDVEDKVTALFMTSWCKFGFYEADFGWGTPVW  
VTVPLIEPKYKNMVMFMDMKCGEGIEVWVNFLEDDMTKFEHHLREILQLF

>PS0SAT1

MATMYSAAVEVISKETIKPTTPTPSQLKNFNLSLLDQCFLYYYYVPIILFYPAATAANSTGSSNHDDL  
LKSSLSKTLVHFYPMAGRMIDNILVDCHDQGINFYKVKIRGKMCDFMSQPDVPLSLLPSEVVSASVPKE  
ALVIVQVNMFDCCGTAICSSVSHKIADAATMSTFIRSWASTTKTSRGGSTAATVTDQKLIPSFDSASLFP  
PSERLTSPSGMSEIPFSSTPEDTEDDKTVSKRFVDFAKITSVREKLQVLMHDNYKSRPTREVVVSLI  
WKSVMKSTPAGFLPVVHNAVNLRRKKMDPPLQDVSGNLSVTVSAFLPATTATTTTNAVNKTINSTSSESQV  
VLHELHDFIAQMRSEIDKVKGDKGSLEKVIQNFASGHDAKINDVEVINFWISSWCRMGLYEIDFGWG  
KPIWVTVDPNIKPNKNCFFMNDTKCGEGIEVWASFLEDDMAKFEHLSEILELI

>SCA0AT1

MNSILWATPTPDHLRTRFRLSLLDQLAHPVFPVPIILFYSSPTTTLDDDHQLGVSQNLKKSLSLSETLTFYPL  
AGRIKDKLLVDCSDEGIEYFESRVNGKISDFMKRDELHLLPYDFQSTLNVIVGNDSHLIVQVNLFDCCG  
IAISVSISHKLADAATLTTFFINTWASITRQAIPESIVSPTFDSAILYPPREGMSSPFGAINKHLTSKVQ  
AGQAEKRVTRRFVFDGTKIATLRARYGNSNDEKKNLPTREAVTALIWKTAMAATSSPKPSIANIIV  
DMRRRLDPPLPEQSFQNLATTVARVAPSITKSTGEMDLLGPMRESIRKINSDSLKVLQDGGGFIKQEFM  
KMALETNGNELELYRFTSWCRFPVYEADFGWGKPNWVAVASLPFKNTSLLMDDRTGDGIEAWICLLEEDM  
ARFERDQELLDVFTLLD

>TC00AT1

MEIQIISRDKVSPSTPTPDHLKSFKLSYLDQQATSNYVTIILFYPPYSTDEDKNQVEHLKRSQDKKSL  
ETLTHFYPVAGRIVNGVTLDCNDKGVFLEARVKNTRLSDFLIRPNIDELSKFLPCDPYVTTNEALCSNS  
LLAIQTTFYFDCCGIALGFCFSHKIADGASMATFINCWASTAINGSTESIPNLFFDLSSLFPAKDSNGLIA  
PSGVGMVDNIVTRRFVFDGKKIDALRGEIIFNNSKKSKEEYPTREAVSAFIWKHAIRAARARAGPLRA  
SAALHAVNLRGRMVPASPNHRFGNASRPAITEIVNLESETESHALVKHLRDAIRGMDGDYVRKLQCGEEG  
FVKSFEARKNFSKEELLVLFNSWCRFPFYEADFGWGKPVVSTTKTLGRNLIILIDTRCGGGIEAWLN  
MLEEDMDELEHDQEFLSFVSF

>TFLOAT1

ELPSLCLLEIFIRNKMTLNVEVISEETIKPSSPTPNHLKTFQLSLVDQYAPPVHVPVLLFYSANENKVE  
NTAHTNRLKESLSEVLTQFYPLAGRITGHEAIDCSDEGVSFSEARISGELKQVLNNPIPQELDQLLPRID  
EFYGLGPKVLLSIQVNIFFSCGGMILAVCTSHKLLDGGSSMSVFLNNWASLSRGDSKLLHPKFNMTSLFPPK  
DIPSPMPPIGSPHKVVSKRFIFDASNIAALRAITKDAIENPTREVVVSALIWRCAVAVRMRTKSLRSSA  
SVVNFVAVNLRGRMDPPLSNDVGNLMIGKSVESSTDIQKQFHSLVSQLRKGLRSIDSGYVKKLQSDNGLS  
ELYDSTIRFFEMDVKGELEAYVITSWCRFPFYEADFGWGKPSWLTSVNLVAKNIIMLMDTNCNGIEAWV  
SLIEEDMASFECEPDIITFTSAKSGLELN

>XSIOAT1

MTLDINVLSQETITPSSSTPNHLRNFKLSLVDQYAPPVHISVILFYPANINDRVKIDERTHRLKRSLSEI  
LTHFYPLGGKINNNQFIDCTDEGVNFFETRVNQRQLSQVLNHPPIPELEQLLNKDDFYRLGPKALLSIQA

NIFDCGMALGVCISHKAADGSSFGLFLNNWAAITREDNGIPQPILGQTSLFPPKDDVFSYVPAGVSSIP  
KVVNKIFVFNAGNIAALKAKASHKLYVEHPTRVEAVSALLWRCARNALRTRPGSANSASVATLAMNLRGN  
MVPALSNLSFGNLMIGTIATSNTESAPELPCLVGELREAKMKVDVDYVRKLQVDDGVSELWNSFMDLNAR  
HIKGELELYTISSWCGFPFYEADFGWGKPMWITSVNLFAPNIFILMDSKCGNGVEACVTLDEEVMARFEC  
EPELIAFTSTTRSA

SALR

>SSCPTCR

MSSNTRVALVTGANKGIGFAIVRDLCRQFAGDVVLTARDVARGQAAVKQLQAEGLSPRFHQLDIIDLQSI  
RALCDFLRKEYGGLDVLVNNAAIAFQLDNPTPFHQAELTMKTNFMGTRNVCTELLPLIKPQGRVNVSS  
TEGVRALNECSPELQKFKSETITEEELVGLMNKFVEDTKNGVHRKEGWSdstyGVTkIGVSVLSRIYAR  
KLREQRAGDKILLNACCPGWVRTDMGGPKAPKSPEVGAETPVYLALLPSDAEGPHGQFVTDKKVVEWGP  
PESYPWVNA

>PSOSALR

MPETCPNTVTKRRCVVVTGGNKGIGFEICKQLSSNGIMVVLTCRDVTKGHEAVEKLNKSNHENVVFHQLD  
VTDPIATMSSLADFIKTHFGKLDILVNNAGVAGFSVDADRFKAMISDIGEDSEELVKIYEKPEAQELMSE  
TYELAEELKINYNVKSVEVLIPLLQLSDSPRIVNVSSSTGSLKYVSNETALEILGDGDALTEERIDM  
VVMMLLKDFKENLIETNGWPSFGAAYTTSKACLNAYTRVLANKIPKFQVNCVCPGLVKTEMNYGIGNYTA  
EEGAHVVRIALFPDDGPGSFFYDCSELSAF

>AMESALR1

MAEIMSYPETKRCAVVTGANKGIGFEICRQLASNGIMVVLTSRDKDKGFEAVEKLNKSSGLSDVIFHQLDV  
MNPTSISSLADFIKTHFGKLDILVNNAGIGGVIVDADRFKALNLGAGELNDNPKLKEVMTETFEESTEECL  
KTNYYGVKAVTEALIPFLQLSNSPIIVNVSSSMGMLKNISNGKALEVLCVDGLTKERIDEVLNMFLLKDF  
KEGLLETGWAARLSAYIITKACVNAYTRILAKEFPTFRINCVCPGYVKTDINFNTGVLVVEEGAKSPVD  
LALLPHNGPSGLFFVRSEISSF

>AMESALR2

MATSVNSSTTKRYAVVTGANKGLGLGICKQLAADHSVNIVLTARNEQRGLEAVEKLNKESAGLSDDQINFH  
QLDVADPASVSSLADFKTKFGRDLILVNNAGIGGVAVYENGFLDQVSKIKNNGTGEVQWDEILTESYEL  
TEQCVQTNYYGAKRMTEALIPLLQLSDSPRIANVSSSMGKLKLNLPNEWAKGILNDEQNLTVEVRVDEVLNE  
YLKDYKEGSIQEKGWPRFMSAYVISKAAMNAYTRILAKKYPTFCINAACPGYVKTDINMNTGKLSVEEGA  
KSVVKLALLPNGGPSGLFFFEGNISSFE

>BTHSALR1

MAEANSTRPTKRVAVVTGSNKGIGYEICRQLACHGGVVVLTARDTKRGGLEAVEKLNKESGLSDVFFHQLD  
VMDSTSIASLAAFIKTQFGKLDILVNNAGIGGATLSDALKAMRLEGKNAKPNWKEIMTETYEGAVECLK  
TNYYGVKQVTEALIPLLQLSNSPRIVNVSSSMGMLKNISHDEAKGVLSADCLTEERVDNMLNDFLTDFK  
EGLLESKGWPIFLSAYTISKASLNAYTRILAKKLPTFRINCVCPGYVKTDNMANTGSLTVEEGALGPVTL  
AFIPDDGPGSGLFFSGTKEATF

>CMASALR1

MAAEIRSDPETRKRCAVVTGANKGIGFEICRQLASNDVLVVLTSRDTKRGTDAVQSLKDSGVSGVVYHQL  
DVTDPPTVASLADFIKTQFGKLDILVNNAGIGGIEVDYDGLIALTRGDGELEDNPKFKEVMTQTFELAE  
CLKTNYYGVKAVTESLIPFLQLSDSARVVNVSSSMGQMKNISNEKAIEILSDVAGLTEERIEELMNEYLK  
DFKEDLIETGWPTKLSAYAISKAALNAYTRILAKKFPTFRINCVCPGFVKTDINYNVTGVLVVEEGAASP  
VRLALLPDDGPGSGLFFFRAEVSDF

>CMASALR2

MAAEIRSDPETRKRCAVVTGANKGIGFEICRQLASNDVLVVLTSRDTKRGTDAVQSLKDSGVSGVVYHQL  
DVTDPPTVASLADFIKTQFGKLDILVNNAGIVGVKIDYEGLTNLIKAGEYNNNDKLLKMTQTFELAE  
LQTNYYGVKSVTEALIPFLQLSDSARVVNVSSSTGKLKNVSNENAKKVLSDVDDLTEERIDEVLNVFRKD  
FKEDMLETNGWPERLAAYTLAKAALNAYTRVAKKFPTFRINSVCPGVVKTINNYTGVLPVEEGAKAPV  
RLALLPDDGPTGVFFFREEVTDF

>CmaSALR3

MAKTCPNTVVTKRRCAVVTGGNKIGFEICKQLSSNGIMVVLTCDVTKGLEAVEKLNKSNHENVVFHQL  
DVTDPVTTMSSLADFIKTHFGKLDILVNNAGVAGFSVDADRFKAMISDIGEDSEELVKIYEKPEAQELMT  
ETYELAEELTINYYGVKSVTEVLIPLQLSDSPRIVNVSSSTGSLKYVSNETALEILGDGDALTEERID  
MVVNMLLKDFKENLIETNGWPSFGAAYTTSKACLNAYTRVFAKKIPKFQVNCVCPGLVKTEMNYGIGNYT  
AEEGAHVVRIALFPDDGPSGFFYDCSELSAF

>CMUSALR1

MAETGATKRCVAVVTGGNKGLGLEVCRLASNGVFFVLTARDEKKGSEAVESLKASGVSDVVFHQLDVADP  
ASVDSLAFIKNRFAKLDILVNNAGISGSVPTVDDAFEKEKLPPEPGQRMVYMMQSITGTYESKECLVT  
NYYGTRVTEALLPLLQLSNSATIVNVSSSAGLLQGIGHKRAIELDDIDENTDKKVEEVLNEFLEDYKE  
GSPEAKGWPSRSLGAYMLSKAAMNAYTRFLAKKFPFRINCVCPCGYVKTDMMNFNTGLLTVEEGAELVKL  
ASLPDDGPTGLFFRNDEVHAF

>CMUSALR2

MEETPTLAEKRYAVVTGGNKIGFEICRQLASNGIVVILTARYEKRGEAVEKLES LGVSNVVFHQLDT  
MDPTSIALLANFVETNFRKLDILVNNAGCNGLVMYSEAYTAFIDAGNHVTDDKVGSLKGIVEQTYEKAEE  
CIETNYFGTKRVTEALLPLLQLSDSPRIVNISSISYQLKFIANEKIRAELNNVECLKDERLDEVVQQFLK  
DFKEDQLLQNGWPLTLSAYKVSKAANAYTRILARKFPKFRINSNHPGYVITDITCNRGLLTPEEGAKRP  
VMLALLPDNGPSGLYFDQMEVSSF

>CTRSALR1

MAETPVSSAATKRCVAVVTGGNKIGLELCRQLASNGVLVLTARDEKRGTEAVEKLGKSGLSDVFFHQLD  
VTNPASVASLADFIKTHFGKLDILVNNAGISGATADFDALNKENLPEEAGPRLFAMQALSENFEMTEK  
LETNYHGTRVTEALLPLLQLSNSARIVNVSSSAGLLQGISHERAKEVFSNIDELTEKNVDELLNEYLKD  
YKEGSPETKGWPARSLAAYMLSKAAMNAYTRFLANKFPFRINSVCPCGYVKTDINFNTGLLSVEEGADSL  
LRLALLPNDGPSGLFFRNKEVSIF

>ECASALR1

MADTRRRYAIVTGANKGIGLEICKQLASNGIFVVLTSRDENRGIEAVGKLNKSGISDVVFHQLDVMNPSS  
ISSLADFIKTQFGKLDILVNNAGISGVTVDADGLKMEYDARKENPGFEEIMIETYEMAEELKTNYYG  
VKAITKALIPFLEQNSARIVNVSSSTGSKLNIPDEKVKEIFSNIDELTEERIDEVLNLFKDFKEGLL  
TKGWPTWSAYTISKAALNAYTRILARKLPSFRVNCVCPGYVKTDITYGTGLLTVEEGAKDPVMAALLPDD  
GPSGVFFFRGKGF

>ECASALR2

MAMETAETKKRFAVVTGANKGIGFEICRQLASNGVFFVLTSRDRNRGMEAVEKLNKSGLSDVVFHQLDVM  
NPTTISSLADFITQFGKLDILVNNAGVGGIIVDVEAFKGMREGHDEHKDKSLKDVMTETYEVEECLKT  
NYYGAKAVTEALIPLLELSNSARIVNVSSSMGQLKNIHNKEAKEILGDAEGLTEEKIDEVLNTFLKDFK  
DSLESKEWPVFSGYTFSKAALNGYTRILAKKFPFLVNSVCPCGYVSTDINFNTGILTVEEGAKSPVRLAL  
LPDDGPSGLFFIRADEVSEV

>GFLSALR1

MAEIRSGSERKRCVAVVTGANKGCGLEICRQLASNGVLVLTSRDIKRGTEAVENLNKNSGLPLVVFHQLDV  
TNPTSIASLADFIKTQFGKLDILVNNAGIIGGIADAEGFRAMAEAYGKPHKQVMTEVMAETNELSEECL  
KTNYYGAKAVTEALLPFLQISDSARIVNIASITGKLENISNEMAKKVLSDIDGLTEEKIDEVLNAYVKDL  
KDNLLETGWPANGCAYRLSKAALNAYTRILAKKFPFHVNSFCPGHVKSDINCNTGVLTAEEGVRKPVS  
LTLQDDGPSGLFFVHGEVSDF

>GFLSALR2

MAEIRSDAERKRCVAVVTGANKGIGFEICRQLASNGFLVILT SRDTKRGTD AVEKLDKSGITDVVFHQLDV  
MDPTSIASLAEFIKTQFGKLDILVNNAGIGGVEVQHDEL RALKQAHGEVKDFSKLGEIMTNVNELTEECL  
KTNYYGVKLT DALIPFLQLSDSARIVNVSSSLGNLKNIPNEKAKDVLSDVDGLTEQRINELLNEFFKDF  
KEDLLETGWPVRI SAYILSKAALNAYTRILARKFPFRINCVCPCGYVKTDITYNTGAFTAEEGAESPVR  
LALLPDDGPTGLFFYRAEVADF

>HCASALR1

MEEIVPSNPSSKRYAVVTGGNKIGLEICRQLASNEILVILTARDEKRGNEAVENLKRSGLSDVIFHQLD



VKDPSSIASLANFIKTHFRKLDILVNNAADGGVIIDGEAFRGLRSGFDTVSDERPELLKGIMEQTNEKAE  
ECLKTNYGKGVTEALLPFLQLSDSARIVNVT SVYGQLTFISNEKVKSELNNVECLREERLDEILQWFL  
KDFKEDKVQVNGWPITVSAYKVSKA AVNAYTRILARKFPNMRINCVHPGYVKTDITCNTGFLTAEEGARP  
LVKLALLPDNGPSGHYFNRM DMSTF

>HCASALR2

MEEIVPSNPSSKRYAVVTGNGKIGLET CRQLASNEIFVILTARDEKRGIEAVENLKRSGLSDVIFHQLD  
VKDPSSIASLANFIKTHFRKLDILVNNAADIGVIIDGEAWSGFGDVSGDERRELLRGIMKETNEKAE ECF  
KTNYGKGVTEALLPILQLSDSARIVNVSS IYGLLKIIIPNEKVKSELNNVDCLTEERLDEILQGFLKDF  
KENKLEANGWPITVSAYKVSKA AVNAYTRILARKFPNMRINCVHPGYVKTDITCNTGFLTAEEGARPLVK  
LALLPDNGPSGHYFNRM DMSTF

>JDISALR1

MYAVVTGANKGIGFEICRQLASNGVVVVL TARDEKRGAEAVENLKESGLSNVVFHQLDLMNPTGLSSLAD  
FIKAKYGKLDILVNNA AISGSIINTDALRVDSQGQSNLMDTLIQTYELSEECLKTNYGKAVTEALLPL  
LQLSSSPRIVNVSSRLGQLENIPNTWAKGVLSDVDILTEEKIDEVLNEFLKDLREGSLETKNWSTAFSAY  
RLSKAALNAYTRILAKKLPKINMYCVC PGYVKTD MNSHTGILTVEEGAEGPVKLALNPNGSSGLFFAHH  
EVVSF

>MCASALR1

MAETVITSPATKRC AVVTGNGKIGLEL CRQLASNGVLVVL TARDEKKGIEAVENLKGCGLPDVVFHQLD  
VTDSASVASLADFIKTHFGKLDILVNNAGIGGFSVDNDALKTTKLSDAVEERAQSFFRAIRETYELAKEC  
LETNYGKRVTEALVPLLQLSNSATIVNVSSSAGLLKNISNERAKELLSNIDELTEEKVDELLNEFLKD  
YKDGLESKGPVVTGSAYKMSKAAMNTYTRFLASKFPSFRINSVCPSYVKTDINFNTGILTVEEGAGSIL  
RLALLPSDGPTGLFFSKMEVSPF

>MCASALR2

MAETISSVAATMKCAVVTGANKGIGFEICRQLASNGVLVVL TARDQNKGLEAVEKLRASGLSDLVVFHQLD  
VMDSASIAALADFIKTHFGKLDILVNNAGIGGVIVDW DALIALKAEVEQKGEQLNLREVTTDGYELAE EEC  
LRTNYGKVKELTEALIPMLQLSSSPRVNVSSSYGQLKIVSNERAKEILSEVDYLTEERVDEV LNGFLKD  
FKEGLETGKWPVTL SAYSVSKAALNAYTRILARKHPTFYINCVCPGHVKTETNRNSGMLSTEEGAESLV  
MLALLPDGGPSGRFFNRKELSSF

>NDOSALR1

MAETNNKNPATKRYAVVTGSNKGIGLEICRQLACHGVFV VSTARDPKRGIEAVEKLEKESGVSDVVFHQLD  
VTDPIASIASLAFIKAQFGKLDILVNNAGIMSAAIVDWDAL AATLGESKDEKPNYKEMMEQTYELAE ECL  
KINYYGKQVTEALIPLLELSDSPRIVNVSSSLG LLKNIPNEEVKVLSDADSLTEEKVDTLLHAF LNDF  
KEDLLEPKGWPVILSAYTVSKAALNAYTRILAKKFPTFRVNSVC PGYVKTDINGNTGTLTVEEGAESAVR  
LAFLPNDGPGSVFFDRKEESSF

>NDOSALR2

MAETVSNSGTRCAVVTGANKGLGLEICRQLASKGVLVVL TARDEKRGVEAVENLRQCGVSDVVFHQLDL  
VNPTSIASLAEFIKDQFGKLDILVNNAGISGSVINNDALRAHQVVISSIHVLDAMVESFESAEECLKAN  
YGGKQVTEELLPLLQLSNSATIVNVSSSIGQLKNITNEWAKEMLSVDVGLTEEKIDEVLNEFVKDYREG  
LLESKSWAPALPAYTL SKA AVNAYTRILAKKFPTIRINCVCPGFVKTDLNSNIGTLTVEEGAEGPVGLAL  
MLDDRSSGQFFSKKEVVSF

>NDOSALR3

MLLSWFLLFRSSPAFLMPTYLFRCAVVTGANKGIGLEICRQLASNGVLVVL TARDEKRGVEAVENLRQCG  
LTDVVFHQLDLLNPTSIASLAEFIKAQFGKLDILVNNA AINGIMINTDPLRVQSDWQTIVREAVVQTYEL  
AEECLKANYGKGVTEALLPLLKLSNSARIVNVSSRYGQLKNICNKWAEVLSVDVSLTEGKIDEVLNE  
FLKDYREGLLESKSWAPA PSAYIVSKSVINAYTRILAKKFPTISINCVCPGFVKTDLNSNIGTLTVEEGA  
EGPVGLALMLDDRSSGQFFSKKEVVSF

>NDOSALR4

MAGISTSSTKRC AVVTGANKGIGLEICRQLPSNGVLVVL TARDEKRGVEAVENLRQCGLSDVVFHQLDLM  
NSTSIASLAEFIQTQFGKLDILVNNA AIHGTTIDNDALKAQSHGNAWSALTGAMVQTYELAE EECINTNYH  
GTKGVTEALLPLLQLSNSARIVNVSSKIGQLENISNEWAKEMLSNVDNLTEEKIDVVLNEFLKDYKEGLL

EIKGWPIAPSAYRISKA AVNAYTRILAKK FPMISINCCTPGFVKTDMSAHIGRLSVEDGAKAVVMIALLP  
DGGPSGLFFVQKEVASF

>PBR SALR1

MAETCPNTVTKMRC AVVTGGNKGIGFEICKQLSSSGIMVVLTCR DATKGLEAVEK LKNTNHENVVFHQLD  
VTDPIITMSSLEDFIKARFGKLDILVNNAGVAGFSVDADR FKAMISDIGEDSEEIEKIYEKPEAQELMSE  
TYELAE ECLKINYYGVKSVTEVLLPLLQLSDSPRIVNVSSSTGSLKYASNETALEILGDGDALTEERIDM  
VVSMLLKDFKENLIEANRWPSFGVAYTTSKACL NAYTRVLAKKIPKFQVNCVCPGLVKTEMNYGIGNYTA  
DEGAKHVVRIALFPDDGPGSGFFYDCSEL SAF

>PBR SALR2

MASKMRC AVVTGGNKGIGFEICKQLASNGITVVLTSRDIKKGLEAVEK LKICNKNVVFHQLDV VNPITIS  
SLADFIKAHFGKLDILVNNAGVSGV SIDVDRFREMTSGIGEGSEETEK LLEQLEKPEMKELLTETYELAE  
ECLKTNYYGVKSVTEVLIPLLELSDSPRIVNITSINGSLKNITNETALEILGDVDALTEERIDMVVMFL  
KDFKEDLIETKGWPSYVTAYKISKTCLNAYTRILARKYATFRVNCVCPGVKSDFN CNIGIFTVEEGAKH  
AVTIALLPDGGPSGFFYERAQLSAF

>PBR SALR3

MLSNETKIRCAVVTGGNKGIGFEICKQLALNGILVVLTSRDIKKGLEAVENLR SCTAKNVVFHQLDV LN  
PLTISSLADFIKTRFRKLDILVNNAGVTGFSINDIDRYVAMQOSIIG EKQKEESSFDGLKGELEKQEIND  
LFIESFELAEHCLKTNYYGVKSVTEILIPLLQLSDSPRIVNLSSMYGN IKNISNKKAMEVLGDVDLLTEE  
RIDEVANMFLKDYKEDALETNGWPGSSSAYKISKACL NAYTRILAKKFSTFCVNSVCPGWVDTDMNYNIG  
IFTAEAAKNAITLALLQDN GRPSGQFFDREVATAF

>PBR SALR4

MLNQKIRCAVVTGGNKGIGFEICRQLASKGITVVL TARDVTKGLKAVEKLNNSFGLANVVFHQLDVMNPI  
IISLSDFIGSQFGKLDILVNNAGVSGVITDVAGFTAVVQALIEKDQNR ENANLKQMIKNRKANLKQMIK  
ETYESAEECLQTNYYGVKSVTKALIPLQLSNSPRIVNVSSLAGQLKNVCNEEALGILSDGDGLKEESVD  
KTVSMFLEDKDDL DIKGWPAYLPAYTLSKASLNAYTRILAREFPTFRINCLCPGYVNSDFNCNTGVVT  
VTEGAKRVVDLALVPDDGPSXLYFIDGEVSPY

>PBR SALR5

MCAVVTGGNKGIGFEICKQLASNGIMVVLTSRDIKKGLEAVEK LKRSNGICSONVFFGQLDV VNPETISS  
LADFIKTQFGKLDILVNNAGVSGV SIDVDRFKVLTSGIGKDSEETEK LLEQLQTP EIKELLTETYELAE  
CLNTNYYGVKSVTEILIPLLQLSDSPRIVNISSIVGSLKNITNETALEILGDVDALTEERINMVAKMFLK  
DFKQGLIETKGWPNYVTAYKISKACLNAHTRMLAKKFAKFVNC LCPGLVKSDFN YNTGIFTAEEGAENA  
VTLALLPDDGPGSGFFYERSEL SAF

>PBR SALR6

MDSETKNRCAVVTGGNRGIGFEICRQLASNGISVVL TARDVTKGLEAVEK LKNSFGLSNVVFHQLDL MNL  
VTLP SLVDFIGSHFGKLDILVNNAGILG AITDAASF KALVEAVEMDKNEEKNLQVITETYESAVECMQ  
TNYHGKSVTKALIPLQLSESPRIVNVSSALGKLFISNQMALEILNDGDGLKEESVDEIVNMFLKDFK  
EDILEIQGWHAYLPAYTISKICLNAYTRILAREFPTFRINCLCPGYVNSDFNCNTGVVTVTEGAKRVVDL  
ALVPDDGPSGLYFIDGEVSPY

>PBR SALR7

MNMAETLLNPEVKRCAVVTGANKGIGFEICRQLASNGIFVVLTSRDRNKGLEAVENL KKSGLSNVTFHQLD  
DVMNLT SVSSLAEFIQTHFGKLDILVNNAGIGGVTIVDEDQLRVLMLEDEKYLENPKLKQIWTEPYDEAE  
KCLQTNYYGVKAVTEAFIPLLELSDSRIIVNVSSAMGMLKNVGNEKAFEVLSNADCLTEERIDVVVNTFL  
NDLKEGCLEAKGWPTLLSAYTISKASVNAYTRILAKKFP TFRINCVC PGFVKTDMMNFNSGVL TVEEGAKS  
PVRLALLPDSGTSGLFFVREEVSSF

>SDI SALR1

MASKMRC AVVTGGNKGIGFEICKQLASNGITVVLTSRDIKKGLEAVEK LKICNKNVVFHQLDV VNPITIS  
SLADFIKAHFGKLDILVNNAGVSGV SIDVDRFREMTSGIGEGSEETEK LLEQLEKPEMKELLTETYELAE  
ECLKTNYYGVKSVTEVLIPLLELSDSPRIVNITSINGSLKNITNETALEILGDVDALTEERIDMVVMFL  
KDFKEDLIETKGWPSYVTAYKISKTCLNAYTRILARKYATFGVNCVCPGVKSDFN CNIGIFTVEEGAKH  
AVTIALLPDGGPSGFFYERAQLSAF

>SDISALR2

MAAEIRSDPETRKRCAVVTGANKGIGFEICRQLASNGISVVLTSRDTKRGTDAFQSLKDSGVSQVYHQL  
DVMPTSVASLADFIKTQFGKLDILVNNAGIGGIEVDYDGLIALTRGDGELEDNPKFKEVMTQTFELAE  
CLTTNYYGVKAVTESLIPFLQLSDSARVVNVSSSTGKLNISNEKAIEVFSVDVGLTEGRIDEVLNEYLK  
DFKEDLIETKGWPTKLSAYTISKAALNAYTRILAKKPFMFRINCVCPCGFVKTDINYNTGVLTVEEGAASP  
VRLALLPDDGPSGLFFFRAEVSDF

>TCOSALR1

MAEMSSVFNQSPAAAKRCAVVTGGNKGIGFEVCRQLASKGVLVLTARDEKRGVEALQKLGSGNADVAF  
HQLDVTNSATIASLVDFIKTQFGKLDILVNNAGISGAIINYDLLKLEEARDEEVGRQLEMLLKAHEETSE  
LVEECVKTNYGKTKVTEALLPLLQLSNSARIVNVSSSLGLLQQISNERAKEVFNNIDEHTEERIDEVLN  
EFLIDHKKGSLQSKGWSNDISAYKVSKAAMNAYTRILARKFPSFCINVCPCGYVKTDITCNTGIFTAEEG  
AESIVELALLPIDGPSGLFFSRNQVSGF

>TCOSALR2

MEENTFSSAEKRCAIVTGANKGIGFEICRQLVSNQVMVILTARNEDRGAKAVETLRESGLSNVVFHQLDI  
KDTTSIAALVSFIESQFKKIDILVNNAENGVIDDFEGFKAYALEYNGMIDANPEKLSQLTVETYEMAE  
CLKTNYGKAVTEALLPFLQLSDSPRIVNISSISGQLNGFSNEKVKAELNNVDCLIEERIDELLQRFLK  
DFKENMLKANGWPLVPSAYRVSKAALNAYTRILARKLPSFRINCVPHPGFVETDMSHHTGALNAEQGAKAP  
VMLALLPQDGPSCYFDQMEMSTF

>XSISALR1

MAEERCAVVTGGNKGIGLEICRQLASNGILVILTARDEKRGTEAVENLKESGFSNVVYHQLDVKDPSSIA  
SLANFINTRFRKLDILVNNAGVGGVIESDAFRALKNGFEDVSDENPKLKGVMQTYEKSEELKTNYY  
GTRVTEALLPALQLSNSARIVNVSSSYGKLMFIHNSVKLELSNFETLTEERIDELILWFLKDFKEDKL  
QENGWPIVTSAYKLSKAAVNAYTRMLARKFPNMLINCVHPGYVKTDINCNTGLLTAEEGAKGPVKMALLP  
DNGPSGHYFNQVMSTF

SANR

>ZMASDR

MADSATS RPTVLVTGAGGRTGQIVYNKLERSEQFVARGLVRTEESKQKIGAAGDVYVADIRDADRLAPA  
VQVDALIIILTSAPKMKPGFDPSKGRPEFYEDGMYPEQVDWLGQKNQIDAAGAAGVKHIVLVGSMGG  
TNPNHPLNSMGNGNILVWKRKAEQYLADSGIPYTIIRPGLQDKDGGVRELLVVGKDELQDTKSI  
DVAEVCVQALQYEEAKFAFDLASKPEGVGTPTKDFRALFSQITARF

>AMESANR1

MAGLVRKVLVTGTAGLTGQIVYKCLRERTEQYIPRGLVRSEERKNKMGGSDDIFIGNIKDVKSLVPAIQG  
IDALIILTSALPKIKPKPGFIPSKGERAENYVREDGSFDEMPECYFEDGGSPVEVDWIGQKNQIDVAKAA  
GVKQIVLVGSGVGTIPNHPLNSLGNQNLVWKRKAEQYLADSGVPYTIIRAGGLEEKPGGLRELLVVGKDD  
ELLQPELVVVSRAEVAECIQALQFEEAKFAFDLGSKPEGIGSPTKDFRDLFSQVTSRF

>AMESANR2

MANSSEKLTVLVTGASGLTGHLAFKCLKERSDKFVVRGLVRSEASKQKLGDDIFIGDVMDPKSLEPAM  
HGIDALIILTSAPKIKPGSLPGADGKRAEDVIDSSFDGPMPEFYEEGQYPEQVDWIGQKNQIDTAKAC  
GVKHIVLVGSMGGSDPNHFLNYMGNGNILIWKRAEQYLADSGIPYTIIRAGGLDNKEGGRELLVVGKDD  
LLPTENGYISRADVAEACVQALQIENVKFAFDLGSKPEGVGEPTKDFKALFASVTPF

>AMESANR3

MASTVIVTGAGGRTGQIVYKCLKERSDQYLARGLVRTEESKEKIGGADDVFGDIRDAESILPAIKGVDA  
LIIILTSAPKMKPGFDPSKGGKPEFYFEDGAYPEQVDWIGQKNQIDAGKAAEVKHIVLVGSMGGTNLNHP  
LNSIGNGNILIWKRAEQYLADSGIPYTIIRAGGLQDKEGGIRELVVGKDELQTEIRITRADVAEVC  
IQALQFEEAKFALDLASKPEGTGEPTKDFKTLFSQISTR

>AMESANR4

MASTVIVTGAGGRTGQIVYKCLKERTDQYVARGLVRTEESKEKIGGADDVFGDIRDAESIAPAIQGVDA  
LVILTSAPKMKPGFDPSKGGKPEFYFEDGAYPEQVDWIGQKNQIDAAGAAGVKQIVLVGSMGGTNLNHP

LNSLGNLILVWKRKAKQYLADSGVPYTIIRAGGLQDKEGGLRELIVVGKDELLEQTDIRTIARADVAEVC  
IQALQFEEAKFKAFDLASKPEGCGEPTKDFKTLFSQISTR

>BTHSANR1

MANSQTVLVTGAAGRTGQIVYKLLKERSDQYVARGLVRTEESKEKIGGKDDVFGDIRDAGSIVPAIQGI  
DALIILTSAPKMKPGFDPTKGRPEFYEEGAMPEQVDWIGQKNQIDAANKAVGVKQIVLVGSMGGTNP  
NPLNKIGDGNILVWKRKAEQYLADSGIPYTIIRSGGLQDKEGGVRELIVAKDELVATDTRSIPRADVAE  
VCIQALQFEEAKFKAFDLASKPEGAGEPTKDFKALFSKITTRF

>CCHSANR1

MATCSQKKTTLVTGASGLTGQIVYKLLKERSDEFVVRGLVRSEASKQKLGDDIYIGDINKPETLVPAL  
EGVDALIIIVTSAIPKIVPGSCAVAGERAEDVIDSSFEGPMPDFYEEGQYPEQVDWIGQKNQVDAKAAG  
VKHVVLVASMGGDPNHFLNYMGNMILIWKRKAEQYLADSGLPYTIIRSGGLDNKAGGRELLVEKDDVL  
LPTESGYIARADVAETCVQAVRHEDLTKFKAFDLGSKPEGTGTPTKDFRALFAPITTTTF

>CCHSANR2

MACKTCCSKIPCFRQKKTTLVTGAAGLTGNMVKLLKERSDLFVARGLVRSEGSKKKIGGHDDVFIGDVM  
DPKSLAPAMKIDALVILTSAPKIKPGSGPNTGKRAEDVIDSSFQGPMPDFYEEGQYPEQVDWIGQKN  
QIDAANKAVGVKHIVLVGSMGGDPNHFLNSLGNLILVWKRKSEQYLADSGVPYTIIRAGGLNKAGGRE  
LLVGNDELLEPTEAGYISRADVAEACVQAVQFEEVTKFKAFDLGSKPEGTGTPTKDFKALFSLVTRF

>CCHSANR3

MVTCSTQKKTTLVTGASGLTGSIVYKLLKERSDKFVVKGLVRSEASKQKIGGGDDVCFDGMKPETLI  
PAMEGVDALIIILSSAVPKIVPGTCAIAGERAEDVIDSSFEGPMPDFYEEGQYPEQVDWIGQKNQVDAK  
AAGVKHVVLVASMGGDPNHFLNYMGNMILIWKRKAEQYLADSGLPYTIIRAGGLDNKVGRELIVGKE  
DELLEPTESAYIARADVAEACIQALQFEEYVKFKAFDLGSKPEGMGTPTTDFGALFTPITTTTF

>CCHSANR4

MAESDRKTTVLLTGAAGATGKFVFKLLKERSEKYVVRGLVRSIESKKKLGENVDDDDVYLGDIQKPETLI  
PALQGVDAALIIILTSIAIKVPGQNPTRGDRAENYFNEDGSLAEDMPEFHFPGPSIPEEVDWIGQKNQIDA  
AITAGVKHIIIVGSGICGTIPEHPLNTIGNDILLWKRKAEKYLTESGVYTIIRAGALDDKEGGVRELLV  
GKDDEVVYQMENIYISRDDVAETCIQALQFEEAKFKAFDLTSKPEGTGTPTKDFKALFSQATARF

>CCHSANR5

MDDSYRKTTLVTGASGATGQIAYNKLKERPEQFVARGFVRSEASKKKIGGGDNVFLGNVMDADSIIPAVE  
GIDALIIILTSAPKMKPGVGFSGNEGERAEDVIDGSFEGPMPDFYEEGQFPEQIDWIGQRNQIDAANKAVG  
VKHIVLVGSMGGSDPNHPLNTLGNLILVWKRKAEQYLADSGVPYTIIRAGGLINKPGLRELLIGKNDE  
LLPTESGYVPREDVAEVCVQALQFEEYVKFKAFDLGSKPEGTGTPTKDFKALFSQVTRRF

>CMASANR1

MEGSSQKITTLVTGASGLTGNLAFSKLLKERSDKFVVRGLVRSEASKQKLGDDIYIGDIKDAESLVPAM  
TGIDGLIILTSAPKIVPGSMPDTEGRSEDVIDGSFEGPMPDFYDEGQYPEQVDWIGQKNQIDTAKSL  
GVKHVVLVASMGGDPNHFLNYMGNLILIWKRKAEQYLADSGLPYTIIRAGGLDNKQGGRELLVDKDDV  
LLPTENGYIARADVAEACVQALQCEETKFKAFDLGSKPEGTGTPTTDFKALFAPITTSF

>CMASANR2

MACKSCCSKVLTAACSTPKKTTLVTGASGLTGRFAFNKLLKERPDKYVARGLVRSEASKQKLGDDIYIGD  
VMDQKSLEPAMKGVDAALIIILTSATPKMVPQGFPEGSGERGEDLIDGSFEGPMPDFYFDEGQTPERVDWIG  
QKNQIHAANKAVGVKHIIILVSSMGSDPNHPLNSLGNLILWKRKSEYLANSGVPYTIIRAGGLDNKDG  
GKRELLVGNDELLEPTEKGYIARADVAEACVQAVLFFDELKNKAFDLGSMPEGTSTPTKDFKALFAPITT  
SF

>CMASANR3

MDDSRKKTTLVTGASGATGKLAYDKLLKERPDQFVARGFVRSENSRKKIGGGDGVFIGDVQNAESIVPAVQ  
GIDALIIILTSAPKIKPGVVPDEGQKAKEYIDSSFESMPEFYDEGQYPEQVDWIGQKNQIDAARAAGVK  
HIIILVSSMGSDPNHPLNSLGNLILIWKRKAEQYLADSGVPYTIIRAGGLIDNPGMRELLIGRNDELLE  
PTEDGYVPRADVAEVCVQATQFEETKFKAFDLGSKPEGKGTPTKDFKALFSKLTDRF

>CMASANR4

MADSDRKKILVTGAAGSTGNLAYKLLKERTEKYVARGLVRSEESKKRIGGADDVFIGNIRDAQTLVPAVE

GIDGLIILTSSLLKIRPGSAAPKGDKAEYYMLEDSFDPDMPFYYEESPEQVDWIGQKNQIDAACAAGV  
KHIVLVGSMGGTDPNQPLNSLGDNGNFIWKRKSEQYLADSGIPYTIIRCGGLDDKEGGKRELLVSKDDE  
MFSQIELIYISRDDVAEVCIQAFECEEAKFKAFLTSKPEGTGTPTRDFKALFAQVTTRF

>CMASANR5

MDNSDRKTVLVTGASGVTGNLAYKLMQRTDKYVGRGFVRSEASKEKIGGTDNVFIGNINDPQTLVPAVQ  
GIDALIILTSSMLKIKPGSAAPKGDKPDNYFNEDGSFDPDMPFYYEDGNSPEEVDWIGQKNQIDAACAA  
GVKHIVLVGTMCGTFPNHPVNILGNGNMLVWKRKSEQYLADSGIPYTIIRAGGLDDKEGGLREIVFSKDD  
EMFADINMIYISRDDVAEVCIQALECDDAKFKAFDLTSNPEGTGPTTDLKALFSQVTTRF

>CMASANR6

MDDSRKTVLVTGASGATGKLAYDKLKERPDQFVARGFVRSENSRKKIGGGDGVFIGDVQNAESIVPAVQ  
GIDALMILTSAPKIKPEFLIPTKGERAENYVTEGASFESVPEFYDEGQFPEQVDWIGQKNQIDVARAA  
GVKHIIILVGSVGGTDPNHPLNSLGNLILWKRKAEQYLADSGVPYTIIRAGGLDPSGGMRELRIGRND  
ELLKTEDGVPREDVADVQATQFEETKFKAFDLGSKPEGKGTPTKDFKALFSQLTDRF

>CMASANR7

MAESQKKMTVLVTGASGLTGQLAFKCLKERSDKFVVRGLVRSEASKQKLGDDIEFIGDILNEESLVPAM  
TGIDGLIILTSAIPRIVPGSMPDTEGKRAEDVVDGSFEGPMPEFYEEGQYPEQVDWIGQKNQIDTAKSL  
GVKHIVLIGSMGGQDPNHFLNYMGNGNLIWKRKAEQYLADSGVPYTIIRAGGLDNKEGGRQLLVGQND  
LLPTEDGYIARADVAEACIQALQIEESKFALDLGSKPEGVGLTKDFKPLFASVTTRF

>CMUSANR1

MADLPRTTVLVTGAGGRTGQIVYKCLKERRDQYAARGLVRTEESKEKIGGADDVFGDIREAERIVPAIQ  
GIDALIILTSAVPMKPGLDPSKGRPEFYFEDGAFPEQVDWIGQKNQIDAADAGVKQIVLVGSMGGTN  
PNHPLNSIGNGNILVWKRKAEQYLADSGVPYTIIRAGGLQDKEGGVRELLISKDDELLSTETRTIARADV  
AEVCIQALQYEESEKFKAFDLASKPEGTGEPTKDFKALFSKITTRF

>ECASANR1

MADSSKKTVLVSGASGLTGSLAFKCLKERSDKFEVRGLVRSEASKQKLGDDIEFIGDISDPKTLPEAM  
EGIDALIILTSAIPRMKPTEEFTAEMISGGRSEDVIDASFSGPMPEFYDEGQYPEQVDWIGQKNQIDTA  
KKMGVKHIVLVGSMGGCDPHFLNHMGNGNLIWKRKAEQYLADSGVPYTIIRAGGLDNKAGGVRELLVA  
KDDVLLPTENGFIARADVAEACVQALEIEEVKNKAFDLGSKPEGVGEATKDFKALFSQVTTPF

>ECASANR2

MEGSCQKITVLVTGASGLTGQLAYKCLKERSEQFEVRGLVRSEASKQKLGDDIEFIGDIMDAKTLEPAM  
KGIDALIILTSAIPKMKPSDEFPAESCSTGRAEDMIDGSFDGPMPEFYFEDGQYPEQVDWIGQKNQIDTA  
KALGVKHIVLVGSMGGSDPNHFLNSLGNLILWKRKAEQYLADSGLAYTIIRAGGLDNKEGGIRELLIG  
KDDVLLPTENGYIARADVAEACIQALKIEEVKFKAFDLGSKPEGTGVPTKDFGALFSPITERF

>ECASANR3

MEGSCQKMTVLVTGASGLTGQLAYKCLKERSEQFVVRGLVRSEASKQKLGDDIEFIGDIMNCQTLEQAM  
KGIDGLIILTSAIPKMKPTDEFPAESLGSRAEDMIDGSFDGPMPEFYFEEGQYPEQVDWIGQKNQIDTA  
KALGVKHVVLVGSMGGSDPKHFLNSLGNLILWKRKAEQYLADSGLAYTIIRAGGLDNKEGGIRELLVG  
KDDLLLPTENGYIARADVAEACVQALQFENVKFKAFDLGSKPEGNGEPTKDFGALFAPISERF

>ECASANR4

MACKTSCSKLMATCCSSKKTVLVTGASGLTGQFANCLKERSDKFVVRGLVRSEGSKKKLGDDIEYIGN  
VMDPKTLEPAMKGVDAIILTSAIPKMKPGQFPENSNGGGAEDMIDGSFEGPMPEFYFDEGQFPEQVDW  
IGQKNQIDVAKACGVKHIVLISSMGSDPNHPLNSLGNLILWKRKSEEYLSNCGVPYTIIRAGGLDNK  
DGGIRQLLVGKNDELLPTEKGYIARADVAEACVQAVQFEELVKFKAFDLGSMPEGTGPTKDFKALFTPI  
TARF

>ECASANR5

MDDSRPKTVLVTGASGATGQIAYNCLKERPEQFIARGFVRSEQSKKIGGGDDVFLGNIMDSNTIVPAVQ  
GIDALIILTSAIPKIKPGVFPNEGEKAKEYIDSSFESMPEFYFDEGQYPEQIDWIGQKNQIDAARAAGVK  
HIILVGSVGGSDPNHPLNSLGNLILVWKRKAEELYAESGVPYTIIRAGGLIDNPGGMRELLVGKDDEFL  
PTENGYVPRADVAEVCVQAVKFEEAKFKTDLGSKPEGKGTPTDFKALFSQVTTRF

>ECASANR6

MAASDLGGKKTVLVTGAAGLTGRLVFKKLERSDKYVVRGLVRSEESKKKIGSGLSDDEEEIFIGDIKDS  
QTLIPAMKGIDALIILTSALPKVKPGPAANRGDRAEYVVEDGSFPDPMPEIYYEQNYPEQVDWIGQKN  
QIDTAIAAGVKQIVLIGSMCGTDPDNFLNKYGNLILVWKRKSEKYLSESGVPHTIIRAGGLDDLEGLR  
ELQVSKDDEMAHIENIMISRADVAEVAVQALEHEEAKFKAFDLTSKPVGTGTPNKDFKALFAQTTVPF

>GFLSANR1

MAESQEKMTVLVTGASGLTGQLAFKKLKERSDKFVVRGLVRSEASKQKLGDDIFIGDILNAESLVPAM  
TGIDGLIILTSVIPKIVPGSFPDGDGKRAEDVVDGSFEGPMPDFYEEGQYPEQVDWIGQKNQIDTAKSL  
GVKHIVLIASMGQDPNHFLNYMGNLILWKRKAEQYLADCGVPYTIIRAGGLDNKEGGRELLVGRNDE  
LLPTENGYISRADVAEACVQALQIEESKFALDLGSKPEGVGEPTKDFKSLFASVTDRF

>GFLSANR2

MDSSSQKMTVLVTGASGLTGSLAYNKLKERSDKFVVRGLVRSEASKQKLGDDIFIGDIMNAESLVPAM  
TGVDGLIILTSVIPKIVPGSFPNADGKRAEDVLDGAFDGPMPDFYEEGQLPEQVDWIGQKNQIDTAKAL  
GVKHVVLIGSMGGQDPNHFLNYMGNMILWKRKAEQYLADSGLPYTIIRAGGLDNKQGGRELLVDKDDV  
LLPTENGYIARADVAEACIQALQCEETKFKAFDLGSKPEGTGTPTDFKALFAPITARF

>GFLSANR3

MACKSCCSKLVAAACSSKKTVLVTGASGLTGQFAFNKLKERSDKYVVRGLVRSEGSKKKLGDDIYIGNV  
MDQKSLEPAMKGVDAIILTSVIPKMKPGQFPEGSGRAEDMIDGSFEGPMPDFYFDEGQYPEQVDWIGQ  
KNQIEAAGAAGVKHIIIVSSMGGDPNHPLNSLGNLILWKRKAEYLAGSGVPYTIIRAGGLDNKQGG  
IRELLVGKNDLLPTEKGYIAREDAEACVQAVLYDEVKFKAFDLGSMPEGTGTPTKDFKALFAPITTSF

>GFLSANR4

MDDSRRTVLVTGASGATGQIAYNKLKERPDQFIARGFVRSENSKQKIGCGEVFIGDIQKAESIVPAVQ  
GIDALIILTSVIPKIKPGLVPDKGEKAKEYIDGSFESMPEFYFDEGQYPEQVDWIGQKNQIDAARAAGVK  
HIIIVGSAGGTPNHPLNSLGNLILWKRKAEQYLAESGVPYTIIRAGGLIDNPGMRELVVGRNDELL  
PTENGYVPRADVAEVCVQATQFEEAKFKAFDLGSKPEGKGTPTKDFKALFSQVSDRF

>GFLSANR5

MVESGRKTVLVTGAAGLTGKLAYKCLKERTEKYVGRGFVRSEESKKRIGGADDVFIGNIKDAQTLIPAVQ  
GIHGLIILTSCSAKVKPGCAAPKGDPRPENYILEDGSLDPDIPEFYFEDGASPEEVDWIGQKNQIDAAKAA  
GVKHIVLVGGMGGMDPYSPLSNFGNGNLVWKRKAEQYLADSGIPYTIIRAGGLEDKEGGRELLVSKDD  
EMFSQMEMAYISRDDVAEVCIQALECEEAKFKAFDLTSKPEGTGKPTRDFKALFSQVTRF

>GFLSANR6

MVGLLRRTVLVTGAAGLTGQIVYNKLRRVVTQYIPRALVRSEERKRKIGGSDDVFIGDITDAKSIIPAIQ  
GIDALIVLTSVIPKIKPGYVPTKGERAENYIEDDGSFDEMPEFYFEDGGEPEQVDWIGQRNQIDAAGAAG  
VKQIVLVGSMCGTIPNHPLNSLGNLILWKRKAEQYLADSGVPYTIIRAGGLEDKAGGLRELIVGQDDD  
LLQQPVLADITRADVAEVCIQALQFEEAKFKAFDLGSKPEGTGFPNTDFKALFCQVTAHF

>JDISANR1

MATLPTVLVTGAGGRTGQIVYKCLKKVDQYVARGLVRTEESKEKIGGADDVFIGNITDAESIVPAFQGI  
DALIILTSVIPKMKPGFDPSKGRPEFYFEDGAYPEQVDWIGQKNQIDAAGVVKQIVLVGSMGGTNLD  
NPLNSLGNLILWKRKAEQYLADSGIPYTIIRSGGLQDKEGGVRELLVGKDELVKTDTRTIARADVAE  
VCVQALQFEEAKFKAFDLASKPEGTGEPTKDFKGLFSKITTF

>MAQSANR1

MADLQTVLVTGAAGRTGQIVYKCLKKERSDQYVARGLVRTEESKEKIGGKDDVFIGDIRDAGSIVPAVQGI  
DALIILTSVIPKMKPGFDPTKGRPEFYFEEGAMPEQVDWIGQKNQIDAAGVVKQIVLVGSMGGTNP  
NPLNKIGDNLILWKRKAEQYLADSGIPYTIIRAGGLQDKEGGVRELIVAKDELVTDTRSIPRADVAE  
VCIQALQFEEAKFKAFDLASKPEGAGEPTKDFKALFSKITTF

>MCASANR1

MANLTRITVLVTGAGGRTGQIVYRKLKERADQYLARGLVRTEESKDKIGGADDVFIGDIRDAESIYPVIO  
GIDALIILSSVIPKMKPGYDPSTGGRPEFIFEDGANPEQVDWIGQKNQIDAAGDAGVKQIVLVGSGGTN  
PNYSLNSMGNLILWKRKAEQYLADSGIPYTIIRAGGLQDKEGGVRELLVGKDELNTETIKIARADV  
AEVCIQALQFEEAKYKAFDLASKPEGTGEPTRNFKALFSQITSRF

>NDOSANR1

MAGLPTVLVTGAGGRTGQIVYKCLKERADQYAARGLVRTEESKEKIGAADDVFGDIRDASSIVPAIQGI  
DALIILTSAPKMKPGFDPKGGRRPEFYEDGAFPEQVDWIGQKNQIDAANKAVGVKQIVLVGSMGGTNDL  
HPLNNGKILVWKRKAEQYLADSGIPYTIIRAAGLQDKEGGVREL VVGKDELLQTETRAIARADVAE  
VCIQALQFEEAKFKAFDLASKPEGTGQPTKDFKALFSKITTRF

>NSASANR1

MAADSSRSTVLVTGAGGRTGQIVYKCLKERTDQYVARGLVRTEESKEKIGGADDVFGDIRDAESLAPAI  
EGIDALVILTSAPKMKPGFDPKGGRRPEFYFEDGAFPEQVDWIGQKHQIDAANKAAGVKQIVLVGSMGGT  
NLNHLNLSIGNGNILVWKRKAEQYLADSGIPYTIIRAAGLQDKEGGLRELIVSKDDELLQTETRTIARAD  
VAEVCVQALQFEEAKFKAFDLASKPEGTGEPTKDFKSLFSQIVSRF

>PBRSANR1

MASTVIVTGAGGRTGQIVYKCLKERTDEFVARGLVRTEESKEKIGGADDVADVADIRDAESIVPAIQGADA  
LVILTSAPKMKPGFDPKGGRRPEFFEDGANPEQVDWIGQKNQIDAANKAAGVKQIVLVGSMGGTNLNHP  
LNSIGNGNILVWKRKAEQYLADSGIPYTIIRAAGLQDKDGGVREL VVGKDELLETDIRTIARADVAEVC  
IQALLLEEAKFKALDLASKPEGTGEPTKDFKTLFSQISTRF

>PBRSANR2

MAESNQKITVLTGASGLTGEIAFKCLKERSDKFVVRGLVRSEASKQRLGGGDEIFLGDVMDKKSLETAM  
QGIDALIILTSAPKIVPGSYPGADGKRAEDVFGESFDNGMPPEFYEEGQYPEQIDWIGQKNQIDTAK  
SCGVKHIVLVGSMGGTDPNNFLNHMANGNILVWKRKAEQYLADSGIPYTIIRAAGLQDKEGGVREL VVGK  
DELLENHFIARADVAEACVQALQIEESKFKAFDLGSMPEGVGEPTKDFKALFAPITTRF

>SCASANR1

MADSRQKLTVLVTGASGLTGQIAFKCLKERSDQFVVRGLVRSEASKQKLGGGDEIYIGDVMNAESLVPAM  
TGIDALIILTSAPKIKPSESFPVVEGQRSEVDVDSFSGMPPEFYEEGQYPEQVDWIGQKNQIDTAKA  
LGVKHIVLVGSMGGTDPNHFLNSMGNGNIIWKRKAEQYLADSGIPYTIIRAAGLQDKEGGVREL VVGKDD  
ELLSTENGYIARADVAEACVQALQIEEAKCKALDMSKPEGVGEPTKDFKGLFASVTTRF

>SCASANR2

MADSRQKFTVLVTGASGLTGHFVAFKCLKERSDQFVVRGLVRSEASKQKLGGGDQIYIGDVMNAESLVPAM  
TGIDALIILTSAPKIKADESFPVAEGQRAEDVIDETFSGMPPEFYEEGQYPEQVDWIGQKNQIDTAKA  
LGVKHVVLVASMGGQDPNHFLNYMGNGNIIWKRKAEQYLADSGIPYTIIRAAGLQDKEGGVREL VVGKDD  
DVLPTANGYIARADVAEACVQALHCEEVKFKAFDLGSKPEGTGTPTKDFKALFAPITTSF

>SCASANR3

MACKSCCSKIMACSTPKKTVLVTGASGLTGQFAFNCLKERSDKFVARGLVRSEGSKKLGGGDEIYIGDV  
MDQKSLEPAMKIDALIILTSAPKMKPGQFPEGGGGGRAEDLIDGSFEGMPPEFYFEEGQYPERVDWI  
GQKNQIDAANKAAGVKHIVLISSMGSDPNHPLNSLGNNGNIIWKRKSEYLANSGVPYTIIRAAGLQDKE  
GGIRELLVGNDELLEPTEKGYIARADVAEACVQAVLFEEVKFKAFDLGSMPEGTGTPTKDFKALFAPITT  
HF

>SCASANR4

MDDSRKTVLVTGASGATGQIAYNCLKERPQFVARGFVRSEHSKQKIGGGDGVFIGDILDPEIAPAVQ  
GIDALIILTSAPKIKPGQFPDTGGKAESYISQSFESMPEFYFEEGQYPEQVDWIGQKNQIDAANKAAGVK  
HIVLLGSMGGTDPNHPLNVLGNNGNIIWKRKSEKYLADSGLPYTIMRAGGLIDNPGMRELLVGRNDEL  
PTENGFVPRADVAEVCVQALLFEEAKFKAFDLASKPEGKGTPTKDFKALFSQVTRF

>SCASANR5

MARLLQSTVLVTGAAGLTGQIVYKCLRERATQYIPRGLVRSEERKKKIGGSDDVFIGDITDAKSIIPAVQ  
GIDALIILTSAPKIKPGFIVPTKGERAENYIGEDGSFDEMPEFYFKDGGSPQVDWIGQKNQIDAANKA  
GVKQIVLVGSMCGTIPNHPLNNGNNGNIIWKRKAEQYLADSGVPYTIIRAAGLQDKEGGVREL VVGKDD  
ELLQPELVDSRADVAEVCVQALQFEEAKFKAFDLGSKPEGTGTPTNDFKALFSQVSTTF

>SDISANR1

MADSDRKTILVTGAAGSTGNLAYKCLKERTEKYVARGLVRSEESKKRIGGADDVFIGNIRDAQTLVPAVE  
GIDGLIILTSSLLKIRPGSAAPKGDKAEEYFLEDGSLDPDMPPEFYEEESPEQVDWIGQKNQIDAANKAAGV  
KHIVLVGSMGGTDPNHPLNLDGNGNIIWKRKAEQYLADSGIPYTIIRCGGLDDKEGGKRELLVSKDDE  
MFSQIELIYISREDVAEVCVQALQAFEEAKFKAFDLTSKPEGTGTPTKDFKALFAQVTTRF

>SDISANR2

MAESQQKMTVLVTGASGLTGQLAFKCLKERSDKFVVRGLVRSEASKQKLGGGDEIFIGDILNTESLVPAM  
TGIDGLIILTSAIPRIVPGSMPDTEGKRAEDVVDGSFEGPMPEFYEEGQYPEQVDWIGQKNQIDTAKSL  
GVKHIVLVGSMGGQDPNHFLNYMGNGNLIWKRKAEQYLADCGVPYTIIRAGGLDNKEGGRQLLVGQNDE  
LLPTEDGYISRTDVAEACIQALQIEESKFALDLGSKPEGVGEPTKDFKPLFASVTTRF

>SDISANR3

MDDSRRTVLVTGASGATGKLAYDKLKERPDQFIAGFVRSRKRKIGGGDGVFIGDVQNAESIVPAVQ  
GIDALIILTSAIPKIKPGLVPDEGQKAEKYIDSSFESMPEFYDEGQYPEQVDWIGQKNQIDAARAAGVK  
HIILVSSMGSDPNHPLNSLGNGNLIWKRKAEQYLADSGVPYTIIRAGGLIDNPGGMRELLIGRNDDEL  
LPTEDGYVPRADVAEVCVQATQFEETKFKAFLDLGSKPEGKGTPTKDFKALFSKLTDRF

>SDISANR4

MANSRDKTVLVTGASGVTGNLAYKMLMERTDKYVGRGFVRSEASKEKIGGTDNVFIGNISDPQTLVPAVQ  
GIDALIILTSSMLKIKPGSAAPKGVKPDYFNEEDGSFDPDMPPEFYEDGNSPEEVDWIGQKNQIDAATAA  
GVKHIVLVGSMCGTYPNHPVNILGNGNMLVWKRKSEQYLADSGIPYTIIRAGGLDDKEGGLREIVFSKDD  
EMFADMMIYISRDDVAEVCIQALECEDAKFKAFDLTSNPEGTGTPTNLKALFSQVTTRF

>SDISANR5

MAESNRSTVLVTGAGGRTGQLVYKCLKERSSEYIARGLVRSEESKSKIGGANDVFIGDVTKPETLAPAIE  
GIDALVILTSGVPMKPGFDPTKGRPEFYFEDGQYPEQVDWEGQKSQIDAATAAGVKQIVLVGSMGGTN  
LNHPLNSLGNGNLIWKRKAEQYLADSGIPYTIIRAGGLQDKEGGIRELLIGKDELLETETKTVARPDV  
AEVCVQALQIEEAKFKAFDLASKPEGTGTPTKDFKALFSQITTRF

>SDISANR6

MTTIIIVTGAGGRTGQIVYKCLKERTDQYVARGLVRTEESKEKIGGADDVFGDIRDADSIVPAIQGADAL  
VILTSAPVPMKPGFDPTKGRPEFYFEEGAYPEQVDWIGQKNQIDAATAAGVKQIVLVGSMGGTNPNHPL  
NSIGNGNILVWKRKAEQYLADSGIPYTIIRAGGLQDKEGGVRELVGKDELLETEIRTIARADVAEVC  
IQALQIEEAKFKALDLASKPEGTGEPTKDFKSLFPQVSTRF

>TCOSANR1

MADLPRTTVLVTGAGGRTGQIVYKCLKERADQYVARGLVRTEESKEKIGGADDVFGDIRDAESILPAIQ  
GIDALIILTSAVPMKPGFDPSKGRPEFYFEEGAYPEQVDWIGQKNQIEAANKAGVKQIVLVGSMGGTN  
PNHPLNSLGNGNILVWKRKAEQYLADSGIPYTIIRAGGLQDKEGGVRELLVVGKDELLEQLDTRSIARE  
AEVCIQALQFEEAKFKAFDLASKPEGAGEPTKDFKALFSKISTRF

>TFLSANR1

MSATDRSTVLVTGAAGRTGQIVYKCLKERVDQYVARGLVRTEESKEKIGGADDVFLGDIRDAGSITPAIQ  
GIDALVILTSGVPMKPGFDPSKGRPEFYFEEGAYPEQVDWIGQKNQIDAATAEAGVKQIVLVGSMGGTN  
LNHPLNSLGNGNILVWKRKAEQYLADSGIPYTIIRAGGLQDKEGGLRELIVGKDELLETETRSITRADV  
AEVCIQALQFEEAKFKAFDLASKPEGTGEPTKDFKALFSQVATRF

>XSISANR1

MAPSTVLVTGAGGRTGQLVYKCLKERVDQYVARGLVRTEESKEKIGGADDVFGDIRDTASIAPAIQID  
ALVILTSAVPMKPGFDPSKGRPEFFEDGAYPEQVDWIGQKNQIDSAKAAGVKQIVLVGSMGGTNPNH  
PLNSLGNANILVWKRKAEQYLADSGIPYTIIRAGGLQDKEGGLRELIVGKDELLETETRGIPRAEVAE  
VCIQALQFEEAKFKALDLASKPEGTGEPTKDFKALFSQVTTRF
