# Supplementary material for: Transcriptome analysis of 20 taxonomically related benzylisoquinoline alkaloid-producing plants
Source: PubMed Central journal article supplement (PMC4575454; doi:10.1186/s12870-015-0596-0), 2015-09-18

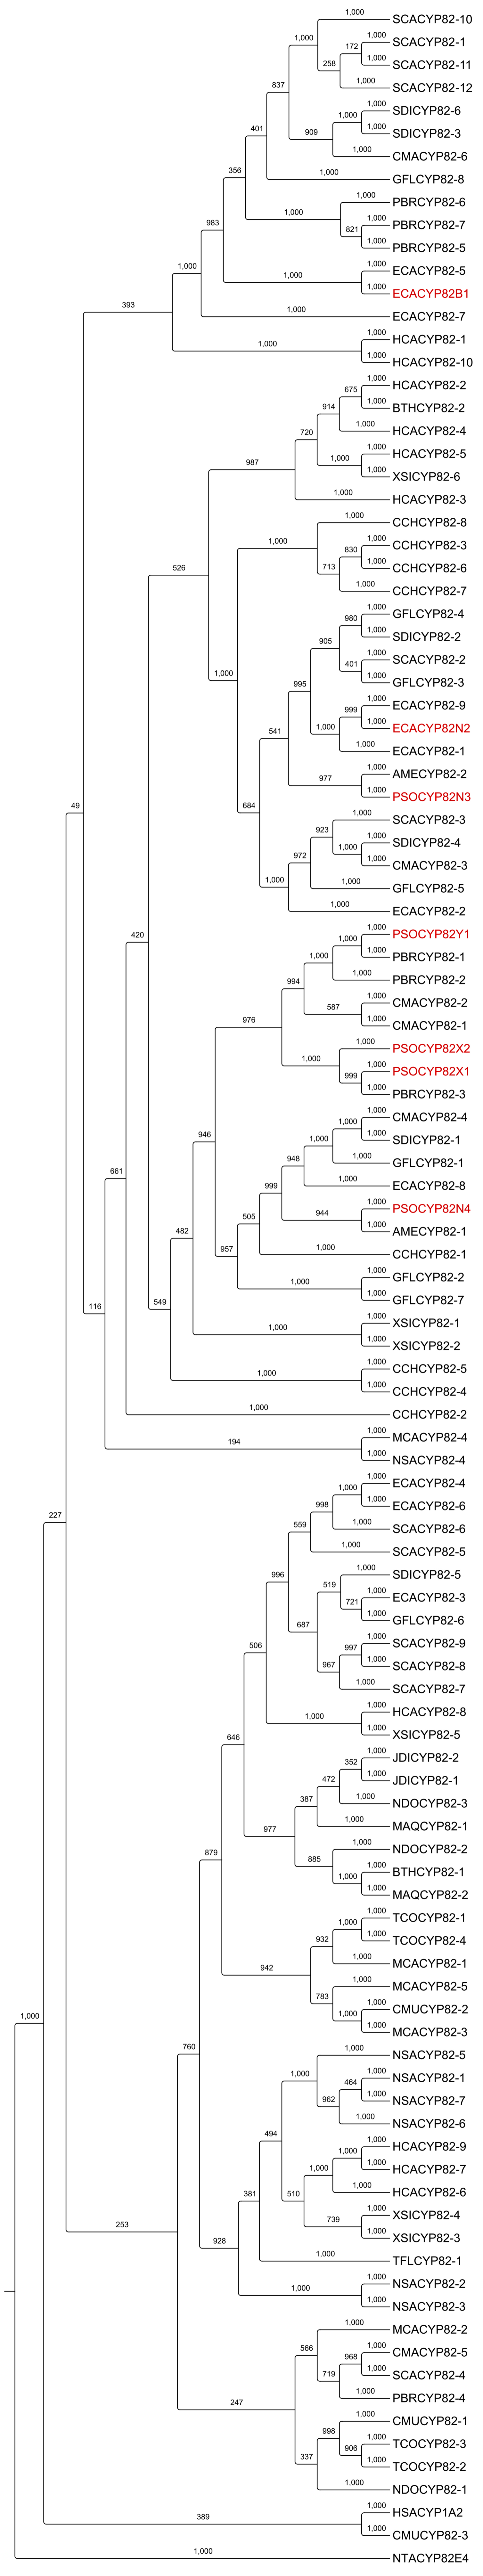

Supplement: 12870_2015_596_MOESM17_ESM.pdf [file 12870_2015_596_MOESM17_ESM.pdf]
